# Supplementary material
Source: publisher figshare collection journal article supplement (https://acs.figshare.com/ndownloader/files/4076650)
Supplement: Supplementary file 1 [file 4076650]

# Multiple Rhodium-Catalysed Cleavages of Single C–C bonds

## SUPPORTING INFORMATION

Christophe Aïssa,\* Damien Crépin, Daniel J. Tetlow, and Kelvin Y. T. Ho

*University of Liverpool, Department of Chemistry, Crown Street, L69 7ZD, United Kingdom.*

e-mail: *aissa@liverpool.ac.uk*

**General.** Otherwise noted, all reactions were carried out in flame-dried glassware under dry nitrogen atmosphere. The solvents were purified either with the solvent purification system Pure Solv MD-6 (THF, Et<sub>2</sub>O, CH<sub>2</sub>Cl<sub>2</sub>, benzene, toluene, hexane). Dry acetone was purchased from VWR. Flash chromatography: Merck silica gel 60 (230-400 mesh). NMR: Spectra were recorded on a Bruker DRX 500 and a Bruker DPX 400 spectrometers in CDCl<sub>3</sub>; chemical shifts ( $\delta$ ) are given in ppm relative TMS. The solvent signals were used as references and the chemical shifts converted to the TMS scale (CDCl<sub>3</sub>:  $\delta_{\text{C}}$  = 77.0 ppm; residual CHCl<sub>3</sub> in CDCl<sub>3</sub>:  $\delta_{\text{H}}$  = 7.24 ppm). IR: PerkinElmer Spectrum 100 FT-IR spectrometer, wavenumbers ( $\tilde{\nu}$ ) in cm<sup>-1</sup>. HRMS at the University of Liverpool: micromass LCT mass spectrometer (ES+). Melting points: Griffin melting point apparatus (not corrected). Elemental analyses: University of Liverpool. All commercially available compounds were used as received.

|                                                                                                                               |     |
|-------------------------------------------------------------------------------------------------------------------------------|-----|
| Syntheses of compounds <b>1<sub>D</sub></b> and <b>2<sub>D</sub></b>                                                          | S2  |
| Syntheses of compounds <b>4</b> and <b>6</b>                                                                                  | S4  |
| Syntheses of compounds <b>8a–8g</b> and <b>11</b>                                                                             | S8  |
| General procedure for Rh-catalyzed reactions                                                                                  | S26 |
| Description of compounds <b>3<sub>D</sub></b> , <b>5</b> , <b>7</b> , <b>9a–9g</b> , <b>10c–10g</b> , <b>12</b> and <b>13</b> | S26 |
| NMR spectra for <b>1<sub>D</sub></b> , <b>2<sub>D</sub></b> , <b>4</b> , <b>6</b> , <b>8a–8g</b> and <b>11</b>                | S31 |
| NMR spectra for <b>3<sub>D</sub></b> , <b>5</b> , <b>7</b> , <b>9a–9g</b> , <b>10c–10g</b> , <b>12</b> and <b>13</b>          | S61 |

Preparation of compounds **1<sub>D</sub>** and **2<sub>D</sub>**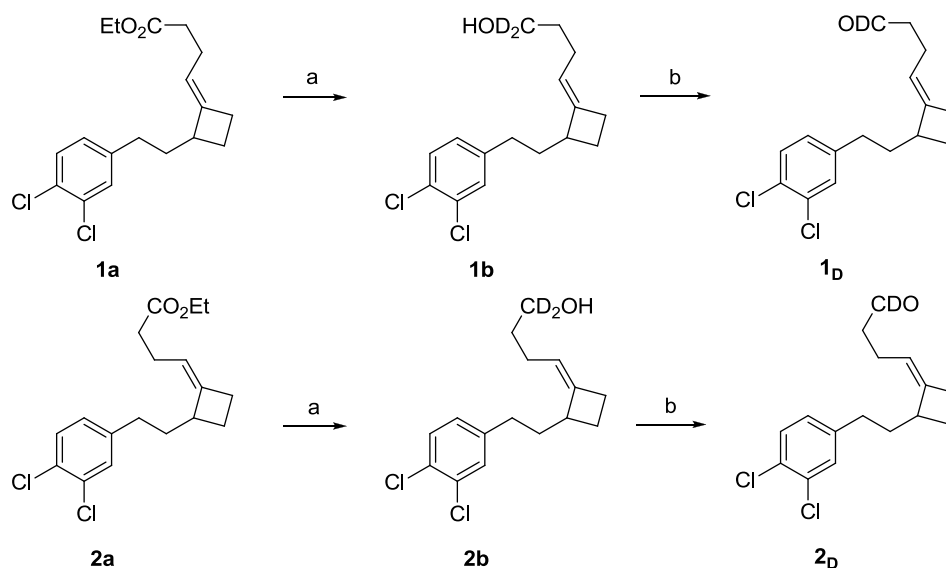

<sup>a</sup>  $\text{LiAlD}_4$ ,  $\text{Et}_2\text{O}$ , 0 °C to r.t.; 69% (**1b**) and 95% (**2b**). <sup>b</sup>  $(\text{COCl})_2$ , DMSO,  $\text{Et}_3\text{N}$ ,  $\text{CH}_2\text{Cl}_2$ , -78 °C; 64% (**1<sub>D</sub>**) and 85% (**2<sub>D</sub>**).

Compounds **1a** and **2a** were described previously.<sup>1</sup>

**Compound 1b.** Ester **1a** (49 mg, 0.144 mmol) in  $\text{Et}_2\text{O}$  (0.3 mL) was added under  $\text{N}_2$  to a suspension of  $\text{LiAlD}_4$  (3.3 mg, 0.079 mmol) in  $\text{Et}_2\text{O}$  (1 mL) at 0 °C (bath temperature). After stirring for 20 minutes at r.t.,  $\text{LiAlD}_4$  (3.3 mg, 0.079 mmol) was added as solid. After stirring for 15 minutes at r.t., few drops of a saturated solution of  $\text{Na}_2\text{SO}_4$  was added until a white precipitate appeared. The mixture was then allowed to stir at room temperature before being filtered through a pad of Celite and concentrated. Purification by flash chromatography (petroleum ether/ $\text{EtOAc}$ , 5/1) afforded **1b** as a colorless oil (30 mg, 69%).<sup>1</sup>  $^1\text{H}$  NMR (500 MHz,  $\text{CDCl}_3$ ):  $\delta$  = 7.30 (d,  $J$  = 8.2 Hz, 1H), 7.23 (d,  $J$  = 1.6 Hz, 1H), 6.97 (dd,  $J$  = 8.2, 1.6 Hz, 2H), 5.10 (tq,  $J$  = 7.3, 2.3 Hz, 1H), 2.91-2.78 (m, 1H), 2.62-2.46 (m, 4H), 2.07 (dtd,  $J$  = 10.7, 9.0, 5.3 Hz, 1H), 1.95 (q,  $J$  = 7.3 Hz, 2H), 1.85 (ddt,  $J$  = 13.1, 9.6, 6.4 Hz, 1H), 1.64 (dtd,  $J$  = 13.5, 9.0, 6.1 Hz, 1H), 1.57 (t,  $J$  = 7.2 Hz, 2H), 1.55-1.49 (m, 1H), 1.35 (s, 1H(OH));  $^{13}\text{C}$  NMR (125 MHz,  $\text{CDCl}_3$ ):  $\delta$  = 144.6, 142.8, 132.1, 130.3, 130.1, 129.5, 127.9, 118.8, 61.9 (quint,  $J$  = 21.3 Hz), 42.8, 36.0, 32.5, 32.4, 26.4, 24.1, 23.6; IR (neat):  $\tilde{\nu}$  = 3324 (br), 2926, 2854, 2198, 2092, 1593, 1562, 1473, 1396, 1258, 1206, 1132, 1098, 1031, 965, 890, 871, 847, 817, 703, 684, 663  $\text{cm}^{-1}$ ; MS (ES<sup>+</sup>):  $m/z$  (rel. intensity): 325 (65), 323 (100) [ $\text{M} + \text{Na}$ ]; HRMS (ES<sup>+</sup>) calcd for  $(\text{C}_{16}\text{H}_{18}^{35}\text{Cl}_2\text{D}_2\text{O} + \text{Na})$ : 323.0914; found: 323.0915; calcd for  $(\text{C}_{16}\text{H}_{18}^{35}\text{Cl}^{37}\text{ClD}_2\text{O} + \text{Na})$ : 325.0885; found: 325.0891.

**Compound 1<sub>D</sub>.** A solution of DMSO (18  $\mu\text{L}$ , 0.259 mmol) in  $\text{CH}_2\text{Cl}_2$  (0.5 mL) was added to a solution of  $(\text{COCl})_2$  (11  $\mu\text{L}$ , 0.130 mmol) in  $\text{CH}_2\text{Cl}_2$  (1 mL) at -78 °C under  $\text{N}_2$ . After stirring for 10 minutes at this temperature, a solution of **1b** (30 mg, 0.100 mmol) in  $\text{CH}_2\text{Cl}_2$  (0.5 mL) was added via canula. After stirring for 15 minutes at -78 °C,  $\text{Et}_3\text{N}$  (69  $\mu\text{L}$ , 0.497 mmol) was added via syringe. After stirring for 30 minutes at r.t., the mixture was quenched with a saturated solution of  $\text{NH}_4\text{Cl}$  (5 mL). The aqueous layer was extracted with  $\text{CH}_2\text{Cl}_2$  ( $1 \times 10$  mL) and the combined organic layers were washed with brine (5 mL), dried over  $\text{Na}_2\text{SO}_4$ ,

<sup>1</sup> Crépin, D.; Dawick, J.; Aïssa, C. *Angew. Chem. Int. Ed.* **2010**, 47, 620.

filtered and concentrated. Purification by flash chromatography (PE/EtOAc, 80/1  $\rightarrow$  60/1  $\rightarrow$  40/1) gave **1d** as colorless oil (19 mg, 64%).  $^1\text{H}$  NMR (500 MHz,  $\text{CDCl}_3$ ):  $\delta$  = 7.30 (d,  $J$  = 8.2 Hz, 1H), 7.23 (d,  $J$  = 2.0 Hz, 1H), 6.97 (dd,  $J$  = 8.2, 2.0 Hz, 2H), 5.06 (tq,  $J$  = 7.3 Hz,  $J$  = 2.4 Hz, 1H), 2.88–2.78 (m, 1H), 2.58–2.46 (m, 4H), 2.43 (t,  $J$  = 7.3 Hz, 2H), 2.20 (q,  $J$  = 7.3 Hz, 2H), 2.07 (dtd,  $J$  = 10.9, 9.0, 5.4 Hz, 1H), 1.83 (ddt,  $J$  = 13.2, 9.5, 6.5 Hz, 1H), 1.63 (dtd,  $J$  = 13.2, 9.3, 5.8 Hz, 1H), 1.58–1.50 (m, 1H);  $^{13}\text{C}$  NMR (125 MHz,  $\text{CDCl}_3$ ):  $\delta$  = 202.3 (t,  $J$  = 25.6 Hz), 145.8, 142.7, 132.0, 130.3, 130.1, 129.5, 127.9, 117.1, 43.6 (t,  $J$  = 3.8 Hz), 42.7, 35.8, 32.5, 26.4, 23.5, 20.7; IR (neat):  $\tilde{\nu}$  = 2917, 2855, 2069, 1713, 1596, 1561, 1473, 1397, 1352, 1259, 1207, 1131, 1094, 1030, 870, 816, 706, 684  $\text{cm}^{-1}$ ; MS (ES<sup>+</sup>):  $m/z$  (rel. intensity): 354 (64), 352 (100) [ $\text{M} + \text{MeOH} + \text{Na}$ ]; HRMS (ES<sup>+</sup>) calcd for ( $\text{C}_{16}\text{H}_{17}^{35}\text{Cl}_2\text{DO} + \text{MeOH} + \text{Na}$ ): 352.0957; found: 352.0941; calcd for ( $\text{C}_{16}\text{H}_{17}^{35}\text{Cl}^{37}\text{ClDO} + \text{MeOH} + \text{Na}$ ): 354.0928; found: 354.0914.

**Compound 2b.** This compound was obtained from **2a** according to the procedure described for the preparation of **1b**. Colorless oil (38 mg, 95%).  $^1\text{H}$  NMR (500 MHz,  $\text{CDCl}_3$ ):  $\delta$  = 7.31 (d,  $J$  = 8.2 Hz, 1H), 7.25 (d,  $J$  = 1.9 Hz, 1H), 6.99 (dd,  $J$  = 8.2 Hz,  $J$  = 1.9 Hz, 2H), 5.05 (tq,  $J$  = 7.2, 2.3 Hz, 1H), 2.99–2.88 (m, 1H), 2.67–2.541 (m, 2H), 2.536–2.42 (m, 2H), 2.08 (dtd,  $J$  = 11.0, 9.1, 7.0 Hz, 1H), 1.98 (q,  $J$  = 7.2 Hz, 2H), 1.95–1.87 (m, 1H), 1.74 (dtd,  $J$  = 13.4, 10.2, 4.9 Hz, 1H), 1.62–1.52 (m, 3H), 1.56 (t,  $J$  = , 2H), 1.33–1.27 (m, 1H(OH));  $^{13}\text{C}$  NMR (125 MHz,  $\text{CDCl}_3$ ):  $\delta$  = 143.0, 142.7, 132.1, 130.3, 130.2, 129.5, 127.8, 120.9, 61.9 (quint,  $J$  = 21.3 Hz), 42.1, 35.7, 32.7, 32.5, 28.0, 24.5, 22.7; IR (neat):  $\tilde{\nu}$  = 3345 (br), 2922, 2851, 2206, 2100, 1593, 1562, 1473, 1454, 1424, 1374, 1290, 1259, 1206, 1131, 1093, 1030, 965, 871, 851, 816, 686, 660  $\text{cm}^{-1}$ ; MS (ES<sup>+</sup>):  $m/z$  (rel. intensity): 325 (65), 323 (100) [ $\text{M} + \text{Na}$ ]; HRMS (ES<sup>+</sup>) calcd for ( $\text{C}_{16}\text{H}_{18}^{35}\text{Cl}_2\text{D}_2\text{O} + \text{Na}$ ): 323.0914; found: 323.0924; calcd for ( $\text{C}_{16}\text{H}_{18}^{35}\text{Cl}^{37}\text{ClD}_2\text{O} + \text{Na}$ ): 325.0885; found: 325.0891.

**Compound 2d.** This compound was obtained from **2b** according to the Swern procedure described for the preparation of **1d**. Colorless oil (26 mg, 85%).  $^1\text{H}$  NMR (400 MHz,  $\text{CDCl}_3$ ):  $\delta$  = 7.31 (d,  $J$  = 8.2 Hz, 1H), 7.24 (d,  $J$  = 2.0 Hz, 1H), 6.99 (dd,  $J$  = 8.2, 2.0 Hz, 2H), 5.00 (tq,  $J$  = 7.2 Hz,  $J$  = 2.4 Hz, 1H), 3.01–2.88 (m, 1H), 2.67–2.55 (m, 2H), 2.54–2.46 (m, 2H), 2.43 (t,  $J$  = 7.3 Hz, 2H), 2.31–2.17 (m, 2H), 2.09 (dtd,  $J$  = 11.0, 9.1, 6.9 Hz, 1H), 2.00–1.88 (m, 1H), 1.75 (dtd,  $J$  = 13.3, 10.1, 5.0 Hz, 1H), 1.63–1.52 (m, 1H);  $^{13}\text{C}$  NMR (100 MHz,  $\text{CDCl}_3$ ):  $\delta$  = 201.9 (t,  $J$  = 26.5 Hz), 144.2, 142.6, 132.1, 130.3, 130.2, 129.6, 127.8, 119.2, 43.9 (t,  $J$  = 3.5 Hz), 42.1, 35.6, 32.5, 28.0, 22.7, 21.0; IR (neat):  $\tilde{\nu}$  = 2921, 2855, 2070, 1712, 1593, 1562, 1472, 1421, 1397, 1355, 1260, 1208, 1132, 1094, 1030, 948, 872, 850, 819, 706, 686, 659  $\text{cm}^{-1}$ ; MS (ES<sup>+</sup>):  $m/z$  (rel. intensity): 354 (65), 352 (100) [ $\text{M} + \text{MeOH} + \text{Na}$ ]; HRMS (ES<sup>+</sup>) calcd for ( $\text{C}_{16}\text{H}_{17}^{35}\text{Cl}_2\text{DO} + \text{MeOH} + \text{Na}$ ): 352.0957; found: 352.0954; calcd for ( $\text{C}_{16}\text{H}_{17}^{35}\text{Cl}^{37}\text{ClDO} + \text{MeOH} + \text{Na}$ ): 354.0928; found: 354.0925.

## Preparation of compounds 4 and 6

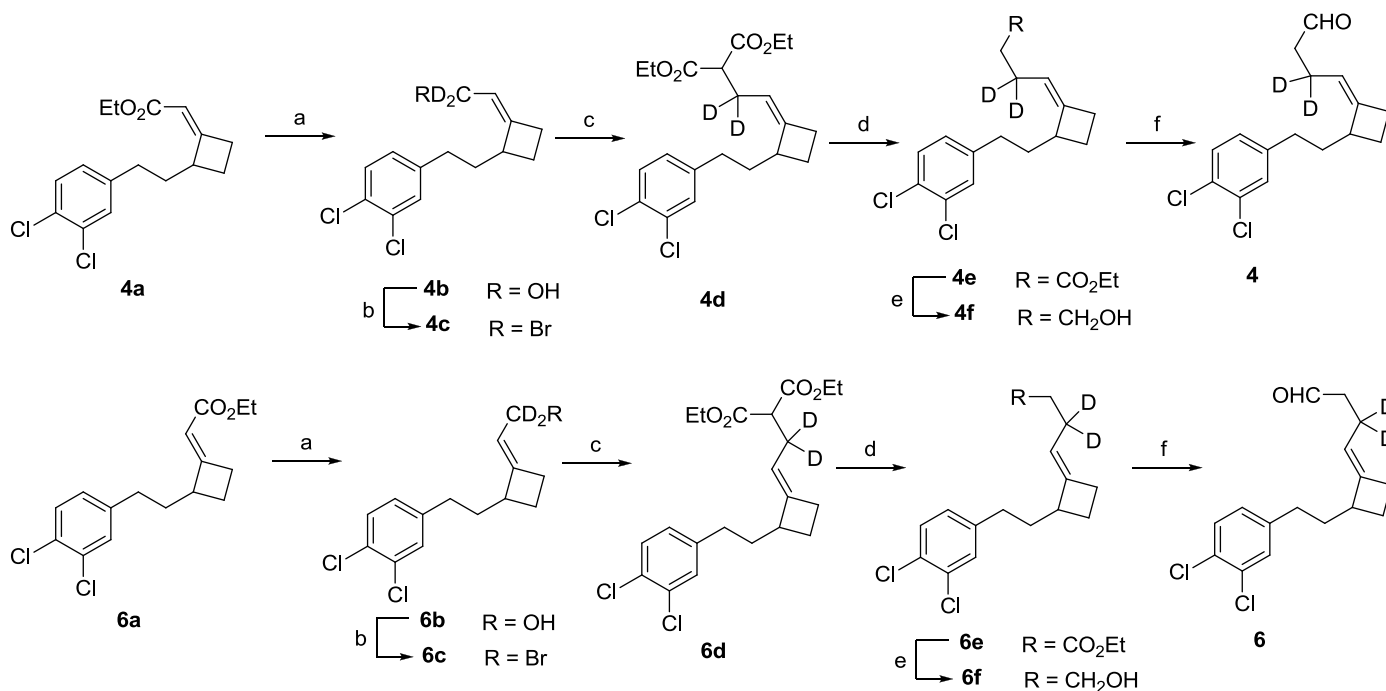

<sup>a</sup> LiAlD<sub>4</sub>, Et<sub>2</sub>O, -20 °C; 61% (**6b**) and 77% (**4b**). <sup>b</sup> PBr<sub>3</sub>, Et<sub>2</sub>O, 0 °C; quantitative. <sup>c</sup> 1) Diethyl malonate, NaH, THF, -78 °C; 2) **6c** or **4c**, THF, 0 °C to r.t.; 75% (**6d**) and 74% (**4d**). <sup>d</sup> LiCl, H<sub>2</sub>O, DMSO, reflux; 79% (**6e**) and 71% (**4e**). <sup>e</sup> LiAlH<sub>4</sub>, Et<sub>2</sub>O, 0 °C to r.t.; 98% (**6f**) and 61% (**4f**). <sup>f</sup> (COCl)<sub>2</sub>, DMSO, Et<sub>3</sub>N, CH<sub>2</sub>Cl<sub>2</sub>, -78 °C; 66% (**6**) and 64% (**4**).

Compounds **6a** and **4a** were prepared as described previously.<sup>1</sup>

**Compound 6b.** Ester **6a** (634 mg, 2.02 mmol) in Et<sub>2</sub>O (2 mL) was added under N<sub>2</sub> to a suspension of LiAlD<sub>4</sub> (46 mg, 1.11 mmol) in Et<sub>2</sub>O (8 mL) at -20 °C (bath temperature). After stirring for 20 minutes at -20 °C, LiAlD<sub>4</sub> (46 mg, 1.11 mmol) was added as solid. After stirring for 35 minutes at -20 °C, few drops of a saturated solution of Na<sub>2</sub>SO<sub>4</sub> was added until a white precipitate appeared. The mixture was then allowed to stir at room temperature before being filtered through a pad of Celite and concentrated. Purification by flash chromatography (PE/EtOAc, 10/1 → 5/1 → 5/2) afforded **6b** as a colorless oil (333 mg, 61%). <sup>1</sup>H NMR (500 MHz, CDCl<sub>3</sub>): δ = 7.32 (d, *J* = 8.5 Hz, 1H), 7.26–7.24 (m, 1H), 7.00 (dd, *J* = 8.5, 2.0 Hz, 1H), 5.38–5.33 (m, 1H), 2.93–2.84 (m, 1H), 2.68–2.45 (m, 4H), 2.09 (dtd, *J* = 10.9, 9.1, 5.3 Hz, 1H), 1.88 (ddt, *J* = 13.4, 9.4, 6.6 Hz, 1H), 1.68 (dtd, *J* = 13.5, 9.1, 6.1 Hz, 1H), 1.62–1.53 (m, 1H), 1.15–1.05 (m, 1H); <sup>13</sup>C NMR (125 MHz, CDCl<sub>3</sub>): δ = 148.8, 142.5, 132.0, 130.2, 130.1, 129.5, 127.8, 118.1, 58.6 (quint., *J* = 21.0 Hz), 42.9, 35.4, 32.4, 26.5, 23.6; IR (neat):  $\tilde{\nu}$  = 3312, 2926, 2857, 2187, 2083, 1693, 1593, 1561, 1472, 1396, 1353, 1312, 1257, 1207, 1131, 1094, 1071, 1030, 953, 905, 870, 816, 704, 684, 661 cm<sup>-1</sup>; MS (ES<sup>+</sup>): *m/z* (rel. intensity): 297 (68), 295 (100) [M + Na]; HRMS (ES<sup>+</sup>) calcd for (C<sub>14</sub>H<sub>14</sub>D<sub>2</sub><sup>35</sup>Cl<sub>2</sub>O + Na): 295.0601; found: 295.0594; calcd for (C<sub>14</sub>H<sub>14</sub>D<sub>2</sub><sup>35</sup>Cl<sup>37</sup>ClO + Na): 297.0572; found: 297.0572.



**Compound 6d.** Under N<sub>2</sub>, PBr<sub>3</sub> (114  $\mu$ L, 1.21 mmol) was added to a solution of **6b** (330 mg, 1.21 mmol) in Et<sub>2</sub>O at 0 °C. After stirring at this temperature for 2.5 hours, the mixture was quenched with brine, and the aqueous layer was extracted with Et<sub>2</sub>O. The combined organic layers were dried over Na<sub>2</sub>SO<sub>4</sub>, filtered and concentrated. Diethyl malonate (0.25 mL, 1.63 mmol) was added to a suspension of NaH (58 mg, 1.45 mmol (60% in oil)) in THF (9 mL) at 0 °C under N<sub>2</sub>. After stirring at r.t. for 30 minutes, this solution was added via canula to a solution of crude **6c** in THF (6.5 mL) at 0 °C under N<sub>2</sub>. After stirring at r.t. for 90 minutes, the mixture was quenched with a saturated solution of NH<sub>4</sub>Cl (10 mL) and diluted with EtOAc (10 mL). The aqueous layer was extracted with EtOAc (2  $\times$  10 mL) and the combined organic layers were washed with brine (10 mL), dried over Na<sub>2</sub>SO<sub>4</sub>, filtered and concentrated. Purification by flash chromatography (PE/EtOAc, 50/1  $\rightarrow$  30/1) gave **6d** as colourless oil (375 mg, 75% over two steps). <sup>1</sup>H NMR (500 MHz, CDCl<sub>3</sub>):  $\delta$  = 7.30 (d, *J* = 8.2 Hz, 1H), 7.22 (d, *J* = 2.0 Hz, 1H), 6.97 (dd, *J* = 8.2, 2.0 Hz, 1H), 5.08–5.01 (m, 1H), 4.21–4.11 (m, 4H), 3.29 (s, 1H), 2.86–2.76 (m, 1H), 2.63–2.43 (m, 4H), 2.05 (dtd, *J* = 10.9, 9.1, 5.2 Hz, 1H), 1.81 (ddt, *J* = 13.5, 9.5, 6.5 Hz, 1H), 1.61 (dtd, *J* = 13.6, 9.2, 6.0 Hz, 1H), 1.55–1.47 (m, 1H), 1.23 (t, *J* = 7.2 Hz, 6H); <sup>13</sup>C NMR (100 MHz, CDCl<sub>3</sub>):  $\delta$  = 169.1 (2C), 147.5, 142.6, 132.0, 130.2, 130.1, 129.5, 127.8, 114.6, 61.2 (2C), 51.9, 42.7, 35.7, 32.3, 26.6 (quint., *J* = 21.1 Hz) 26.4, 23.4, 14.1 (2C); IR (neat):  $\tilde{\nu}$  = 2980, 2937, 2861, 1730, 1590, 1560, 1473, 1394, 1368, 1318, 1210, 1175, 1150, 1131, 1096, 1030, 952, 868, 818, 684, 658 cm<sup>-1</sup>; MS (ES<sup>+</sup>): *m/z* (rel. intensity): 439 (63), 437 (100) [M + Na]; HRMS (ES<sup>+</sup>) calcd for (C<sub>21</sub>H<sub>24</sub>D<sub>2</sub><sup>35</sup>Cl<sub>2</sub>O<sub>4</sub> + Na): 437.1231; found: 437.1215; calcd for (C<sub>21</sub>H<sub>24</sub>D<sub>2</sub><sup>35</sup>Cl<sup>37</sup>ClO<sub>4</sub> + Na): 439.1202; found: 439.1203.

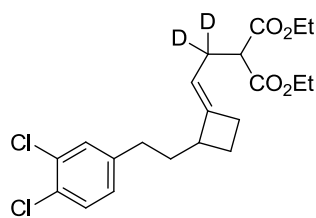

**Compound 6e.** Lithium chloride (73 mg, 1.727 mmol) was added to a solution of **6d** (326 mg, 0.785 mmol) in DMSO (5 mL). Seven drops of water were added via pipette then the mixture was stirred at 155 °C (oil bath temperature) during 16 hours. At room temperature, the mixture was partitioned between brine (5 mL) and EtOAc (5 mL) and extracted with EtOAc (3  $\times$  5 mL). The combined organic layers were dried over Na<sub>2</sub>SO<sub>4</sub>, filtered and evaporated. Purification by flash chromatography (PE/EtOAc, 1/0  $\rightarrow$  90/1) gave **7e** as colourless oil (212 mg, 79%). <sup>1</sup>H NMR (500 MHz, CDCl<sub>3</sub>):  $\delta$  = 7.30 (d, *J* = 8.0 Hz, 1H), 7.23 (d, *J* = 2.0 Hz, 1H), 6.97 (dd, *J* = 8.0, 2.0 Hz, 1H), 5.09–5.04 (m, 1H), 4.10 (q, *J* = 7.0 Hz, 2H), 2.87–2.78 (m, 1H), 2.61–2.46 (m, 4H), 2.28 (s, 2H), 2.05 (dtd, *J* = 10.9, 9.0, 5.3 Hz, 1H), 1.83 (ddt, *J* = 13.4, 9.5, 6.5 Hz, 1H), 1.62 (dtd, *J* = 13.5, 9.1, 5.9 Hz, 1H), 1.57–1.49 (m, 1H), 1.23 (t, *J* = 7.0 Hz, 3H); <sup>13</sup>C NMR (125 MHz, CDCl<sub>3</sub>):  $\delta$  = 173.2, 145.5, 142.7, 132.0, 130.2, 130.1, 129.4, 127.8, 117.2, 60.2, 42.7, 35.8, 34.2, 32.4, 26.3, 23.5, 22.8 (quint., *J* = 19.0 Hz), 14.2; IR (neat):  $\tilde{\nu}$  = 2972, 2931, 2851, 2203, 2106, 1732, 1593, 1562, 1473, 1395, 1369, 1339, 1263, 1182, 1131, 1031, 871, 817, 684, 658 cm<sup>-1</sup>; MS (ES<sup>+</sup>): *m/z* (rel. intensity): 367 (63), 365 (100) [M + Na]; HRMS (ES<sup>+</sup>) calcd for (C<sub>18</sub>H<sub>20</sub>D<sub>2</sub><sup>35</sup>Cl<sub>2</sub>O<sub>2</sub> + Na): 365.1020; found: 365.1012; calcd for (C<sub>18</sub>H<sub>20</sub>D<sub>2</sub><sup>35</sup>Cl<sup>37</sup>ClO<sub>2</sub> + Na): 367.0991; found: 367.0997.

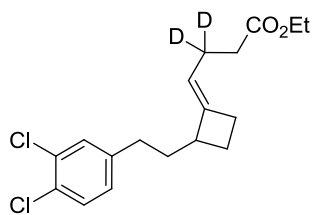

**Compound 6f.** Ester **6e** (250 mg, 0.728 mmol) in Et<sub>2</sub>O (1 mL) was added under N<sub>2</sub> to a suspension of LiAlH<sub>4</sub> (14 mg, 0.364 mmol) in Et<sub>2</sub>O (4 mL) at 0 °C (bath temperature). After stirring for 20 minutes at 0 °C, LiAlH<sub>4</sub> (14 mg, 0.364 mmol) was added as solid. After stirring for 35 minutes at r.t., few drops of a saturated solution of Na<sub>2</sub>SO<sub>4</sub> were added until a white precipitate appeared. The mixture was then allowed to stir at room temperature before being filtered through a pad of Celite and concentrated. Purification by flash chromatography (PE/EtOAc, 15/1  $\rightarrow$  10/1  $\rightarrow$  5/1  $\rightarrow$  3/1) afforded **6f** as a colourless oil (215 mg, 98%). <sup>1</sup>H NMR (500 MHz, CDCl<sub>3</sub>):  $\delta$  = 7.28 (d, *J* = 8.2 Hz, 1H), 7.22 (d, *J* = 1.6 Hz, 1H), 6.96 (dd, *J* = 8.2, 1.6 Hz, 1H), 5.11–5.05 (m, 1H), 3.59 (t, *J* = 6.6 Hz, 2H),

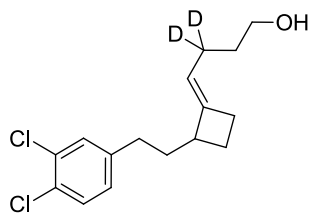

2.87–2.77 (m, 1H), 2.60–2.44 (m, 4H), 2.06 (dtd,  $J = 10.9, 9.0, 5.4$  Hz, 1H), 1.85 (ddt,  $J = 13.1, 9.5, 6.5$  Hz, 1H), 1.64 (dtd,  $J = 13.4, 9.1, 5.9$  Hz, 1H), 1.59–1.50 (m, 1H), 1.57 (t,  $J = 6.5$  Hz, 2H), 1.31–1.24 (m, 1H(OH));  $^{13}\text{C}$  NMR (125 MHz,  $\text{CDCl}_3$ ):  $\delta = 144.6, 142.7, 132.0, 130.2, 130.1, 129.4, 127.8, 118.6, 62.5, 42.7, 35.9, 32.5, 32.3, 26.4, 23.5, 23.4$  (quint.,  $J = 18.8$  Hz); IR (neat):  $\tilde{\nu} = 3323$  (br), 2929, 2859, 2187, 2100, 1593, 1561, 1472, 1396, 1350, 1258, 1207, 1131, 1052, 1030, 906, 870, 816, 684, 658  $\text{cm}^{-1}$ ; MS (ES<sup>+</sup>):  $m/z$  (rel. intensity): 325 (65), 323 (100) [ $\text{M} + \text{Na}$ ]; HRMS (ES<sup>+</sup>) calcd for ( $\text{C}_{16}\text{H}_{18}\text{D}_2^{35}\text{Cl}_2\text{O} + \text{Na}$ ): 323.0914; found: 323.0902; calcd for ( $\text{C}_{16}\text{H}_{18}\text{D}_2^{35}\text{Cl}^{37}\text{ClO} + \text{Na}$ ): 325.0885; found: 325.0884.

**Compound 6.** A solution of DMSO (61  $\mu\text{L}$ , 0.863 mmol) in  $\text{CH}_2\text{Cl}_2$  (0.5 mL) was added to a solution of  $(\text{COCl})_2$  (37  $\mu\text{L}$ , 0.432 mmol) in  $\text{CH}_2\text{Cl}_2$  (3 mL) at  $-78^\circ\text{C}$  under  $\text{N}_2$ . After stirring for 10 minutes at this

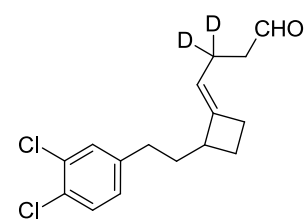

temperature, a solution of **6f** (100 mg, 0.332 mmol) in  $\text{CH}_2\text{Cl}_2$  (1 mL) was added via canula. After stirring for 15 minutes at  $-78^\circ\text{C}$ ,  $\text{Et}_3\text{N}$  (0.23 mL, 1.66 mmol) was added via syringe. After stirring for 30 minutes at r.t., the mixture was quenched with a saturated solution of  $\text{NH}_4\text{Cl}$  (10 mL). The aqueous layer was extracted with  $\text{CH}_2\text{Cl}_2$  ( $2 \times 10$  mL) and the combined organic layers were washed with brine (10 mL), dried over  $\text{Na}_2\text{SO}_4$ , filtered and concentrated. Purification by flash

chromatography (PE/EtOAc, 70/1  $\rightarrow$  30/1  $\rightarrow$  15/1) gave **7** as colourless oil (65 mg, 66%).  $^1\text{H}$  NMR (500 MHz,  $\text{CDCl}_3$ ):  $\delta = 9.73$  (t,  $J = 1.6$  Hz, 1H), 7.29 (d,  $J = 8.2$  Hz, 1H), 7.22 (d,  $J = 1.8$  Hz, 1H), 6.97 (dd,  $J = 8.2, 1.8$  Hz, 1H), 5.08–5.03 (m, 1H), 2.89–2.77 (m, 1H), 2.62–2.44 (m, 4H), 2.41 (s, 2H), 2.06 (dtd,  $J = 10.9, 9.0, 5.4$  Hz, 1H), 1.83 (ddt,  $J = 13.4, 9.5, 6.3$  Hz, 1H), 1.62 (dtd,  $J = 13.5, 9.1, 6.0$  Hz, 1H), 1.57–1.50 (m, 1H);  $^{13}\text{C}$  NMR (125 MHz,  $\text{CDCl}_3$ ):  $\delta = 202.4, 145.8, 142.7, 132.0, 130.3, 130.1, 129.5, 127.9, 116.9, 43.6, 42.7, 35.8, 32.5, 26.4, 23.5, 20.1$  (quint,  $J = 19.8$  Hz); IR (neat):  $\tilde{\nu} = 3027, 2918, 2856, 2820, 2720, 2197, 2111, 1722, 1593, 1561, 1472, 1395, 1350, 1327, 1257, 1208, 1131, 1071, 1030, 872, 817, 705, 684, 660$   $\text{cm}^{-1}$ ; MS (CI):  $m/z$  (rel. intensity): 320 (13), 318 (65), 316 (100); HRMS (CI) calcd for ( $\text{C}_{16}\text{H}_{16}\text{D}_2^{35}\text{Cl}_2\text{O} + \text{H}$ ): 299.0933; found: 299.0937.

**Compound 4b.** This compound was prepared from **4a** (324 mg, 1.034 mmol) according to the procedure described for the preparation of **6b**. Colourless oil (217 mg, 77%).  $^1\text{H}$  NMR (500 MHz,  $\text{CDCl}_3$ ):  $\delta = 7.29$  (d,  $J = 8.2$  Hz, 1H), 7.22 (d,  $J = 1.8$  Hz, 1H), 6.97 (dd,  $J = 8.2, 1.8$  Hz, 1H), 5.32–5.27 (m, 1H), 3.02–2.93 (m, 1H), 2.70–2.61 (m, 1H), 2.60–2.49 (m, 2H), 2.45 (ddd,  $J = 13.8$  Hz, 10.3, 6.8 Hz, 1H), 2.10 (dtd,  $J = 11.0, 9.1, 6.9$  Hz, 1H), 1.94–1.85 (m, 1H), 1.76 (dtd,  $J = 13.4, 10.0, 5.0$  Hz, 1H), 1.69–1.62 (m, 1H(OH)), 1.62–1.56 (m, 1H);  $^{13}\text{C}$  NMR (125 MHz,  $\text{CDCl}_3$ ):  $\delta = 147.9, 142.5, 132.1, 130.3,$

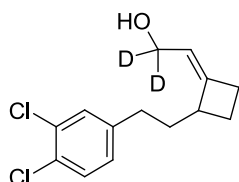

130.2, 129.7, 127.9, 120.3, 58.6 (quint.,  $J = 21.9$  Hz), 42.3, 36.2, 32.5, 28.3, 22.8; IR (neat):  $\tilde{\nu} = 3321$  (br), 2937, 2857, 2187, 2096, 1694, 1593, 1562, 1473, 1396, 1348, 1208, 1131, 1070, 1030, 969, 951, 872, 817, 703, 686, 659  $\text{cm}^{-1}$ ; MS (ES<sup>+</sup>):  $m/z$  (rel. intensity): 297 (81), 295 (100) [ $\text{M} + \text{Na}$ ]; HRMS (ES<sup>+</sup>) calcd for ( $\text{C}_{14}\text{H}_{14}\text{D}_2^{35}\text{Cl}_2\text{O} + \text{Na}$ ): 295.0601; found: 295.0601; calcd for ( $\text{C}_{14}\text{H}_{14}\text{D}_2^{35}\text{Cl}^{37}\text{ClO} + \text{Na}$ ): 297.0572; found: 297.0569.

**Compound 4d.** Intermediate allylic bromide **4c** was prepared from **4b** (315 mg, 1.15 mmol) according to the procedure described for the preparation of **6c**. Compound **4d** was then prepared from **9c** according to the procedure described for the preparation of **6d**. Colourless oil (353 mg, 74% over two steps).  $^1\text{H}$  NMR (500 MHz,  $\text{CDCl}_3$ ):  $\delta = 7.31$  (d,  $J = 8.0$  Hz, 1H), 7.26 (d,  $J = 2.0$  Hz, 1H), 7.01 (dd,  $J = 8.0, 2.0$  Hz, 1H), 5.01–4.96 (m, 1H), 4.16 (q,  $J = 7.1$  Hz, 2H), 4.15 (q,  $J = 7.1$  Hz, 2H), 3.26 (s, 1H), 3.01–2.91 (m, 1H), 2.66–2.54 (m, 2H), 2.52–2.42 (m, 2H), 2.07 (dtd,  $J = 11.0, 9.1, 7.0$  Hz, 1H), 2.01–1.92 (m, 1H), 1.73 (dtd,  $J = 13.4, 10.4, 4.9$  Hz, 1H), 1.61–1.53 (m, 1H), 1.23 (t,  $J = 7.1$  Hz, 3H), 1.22 (t,  $J = 7.1$  Hz, 3H);  $^{13}\text{C}$  NMR (125

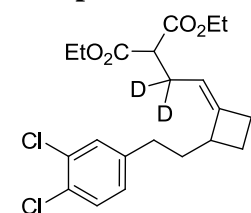

MHz, CDCl<sub>3</sub>):  $\delta$  = 169.0 (2C), 145.8, 142.5, 131.9, 130.2, 130.1, 129.4, 127.8, 116.6, 61.22, 61.16, 52.1, 42.0, 35.4, 32.4, 28.0, 26.9 (quint.,  $J$  = 19.4 Hz), 22.5, 14.0 (2C); IR (neat):  $\tilde{\nu}$  = 2979, 2938, 2856, 1730, 1590, 1562, 1473, 1393, 1368, 1319, 1209, 1175, 1151, 1131, 1096, 1030, 942, 868, 818, 686, 659 cm<sup>-1</sup>; MS (ES<sup>+</sup>):  $m/z$  (rel. intensity): 439 (65), 437 (100); HRMS (ES<sup>+</sup>) calcd for (C<sub>21</sub>H<sub>24</sub>D<sub>2</sub><sup>35</sup>Cl<sub>2</sub>O<sub>4</sub> + Na): 437.1231; found: 437.1215; calcd for (C<sub>21</sub>H<sub>24</sub>D<sub>2</sub><sup>35</sup>Cl<sup>37</sup>ClO<sub>4</sub> + Na): 439.1202; found: 439.1184.

**Compound 4e.** This compound was prepared from **4d** (353 mg, 0.85 mmol) according to the procedure described for the preparation of **6e**. Colourless oil (242 mg, 71%). Under these conditions, partial isomerisation of the C–C double bond was observed (*E/Z*, 4:96). <sup>1</sup>H

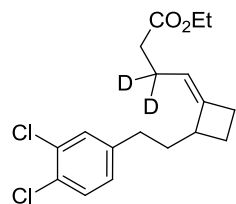

NMR (500 MHz, CDCl<sub>3</sub>):  $\delta$  = 7.31 (d,  $J$  = 8.2 Hz, 1H), 7.25 (d,  $J$  = 2.0 Hz, 1H), 7.00 (dd,  $J$  = 8.2, 2.0 Hz, 1H), 5.03–4.98 (m, 1H), 4.09 (q,  $J$  = 7.2 Hz, 2H), 3.01–2.90 (m, 1H), 2.66–2.54 (m, 4H), 2.27 (s, 2H), 2.07 (dtd,  $J$  = 11.0, 9.1, 6.9 Hz, 1H), 1.99–1.90 (m, 1H), 1.73 (dtd,  $J$  = 13.4, 10.2, 4.9 Hz, 1H), 1.61–1.52 (m, 1H), 1.22 (t,  $J$  = 7.2 Hz, 3H); <sup>13</sup>C NMR (125 MHz, CDCl<sub>3</sub>):  $\delta$  = 173.2, 143.9, 142.6, 132.0, 130.2, 130.0, 129.5, 127.8, 119.3, 60.2, 42.0, 35.6, 34.5, 32.5, 28.0, 23.1 (quint.,  $J$  = 19.9 Hz), 22.6, 14.2; IR (neat):  $\tilde{\nu}$  = 2967, 2937, 2856, 2203, 2106, 1732, 1593, 1563, 1473, 1395, 1369, 1339, 1263, 1182, 1130, 1030, 949, 871, 817, 706, 686, 659 cm<sup>-1</sup>; MS (ES<sup>+</sup>):  $m/z$  (rel. intensity): 367 (67), 365 (100) [M + Na]; HRMS (ES<sup>+</sup>) calcd for (C<sub>18</sub>H<sub>20</sub>D<sub>2</sub><sup>35</sup>Cl<sub>2</sub>O<sub>2</sub> + Na): 365.1020; found: 365.1019; calcd for (C<sub>18</sub>H<sub>20</sub>D<sub>2</sub><sup>35</sup>Cl<sup>37</sup>ClO<sub>2</sub> + Na): 367.0991; found: 367.1001.

**Compound 4f.** This compound was prepared from **4e** (240 mg, 0.699 mmol) according to the procedure described for the preparation of **6f**. Colourless oil (128 mg, 61%, *Z* isomer only). <sup>1</sup>H

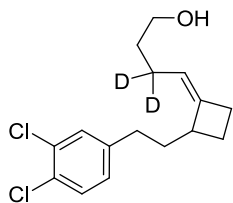

NMR (400 MHz, CDCl<sub>3</sub>):  $\delta$  = 7.31 (d,  $J$  = 8.4 Hz, 1H), 7.25 (d,  $J$  = 2.0 Hz, 1H), 7.00 (dd,  $J$  = 8.4, 2.0 Hz, 1H), 5.07–5.02 (m, 1H), 3.62 (t,  $J$  = 6.4 Hz, 2H), 3.01–2.89 (m, 1H), 2.67–2.55 (m, 2H), 2.54–2.42 (m, 2H), 2.08 (dtd,  $J$  = 11.1, 9.2, 7.0 Hz, 1H), 2.01–1.90 (m, 1H), 1.74 (dtd,  $J$  = 13.5, 10.1, 5.0 Hz, 1H), 1.63–1.51 (m, 3H), 1.28–1.17 (m, 1H(OH)); <sup>13</sup>C NMR (100 MHz, CDCl<sub>3</sub>):  $\delta$  = 143.0, 142.7, 132.0, 130.2, 130.1, 129.5, 127.8, 120.8, 62.5, 42.1, 35.6, 32.7, 32.5, 28.0, 23.8 (quint.,  $J$  = 19.0 Hz), 22.7; IR (neat):  $\tilde{\nu}$  = 3320 (br), 2933, 2861, 2187, 2106, 1593, 1562, 1473, 1396, 1347, 1259, 1208, 1131, 1051, 1030, 949, 907, 871, 816, 732, 686, 659 cm<sup>-1</sup>; MS (ES<sup>+</sup>):  $m/z$  (rel. intensity): 325 (67), 323 (100) [M + Na]; HRMS (ES<sup>+</sup>) calcd for (C<sub>16</sub>H<sub>18</sub>D<sub>2</sub><sup>35</sup>Cl<sub>2</sub>O + Na): 323.0914; found: 323.0916; calcd for (C<sub>16</sub>H<sub>18</sub>D<sub>2</sub><sup>35</sup>Cl<sup>37</sup>ClO + Na): 325.0885; found: 325.0898.

**Compound 4.** This compound was prepared from **4f** (54 mg, 0.179 mmol) according to the procedure described for the preparation of **6**. Colourless oil (35 mg, 64%). <sup>1</sup>H NMR (500 MHz,

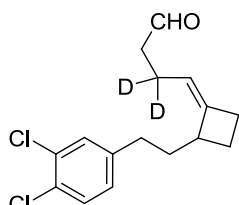

CDCl<sub>3</sub>):  $\delta$  = 9.74 (t,  $J$  = 1.5 Hz, 1H), 7.31 (d,  $J$  = 8.5 Hz, 1H), 7.25 (d,  $J$  = 2.0 Hz, 1H), 6.99 (dd,  $J$  = 8.5, 2.0 Hz, 1H), 5.02–4.97 (m, 1H), 3.00–2.90 (m, 1H), 2.65–2.59 (m, 2H), 2.53–2.43 (m, 2H), 2.42 (s, 2H), 2.09 (dtd,  $J$  = 11.0, 9.1, 6.9 Hz, 1H), 1.99–1.89 (m, 1H), 1.75 (dtd,  $J$  = 13.5, 10.2, 5.0 Hz, 1H), 1.63–1.53 (m, 1H); <sup>13</sup>C NMR (125 MHz, CDCl<sub>3</sub>):  $\delta$  = 202.3, 144.2, 142.6, 132.1, 130.3, 130.2, 129.6, 127.8, 119.1, 43.9, 42.1, 35.6, 32.5, 28.1, 22.6, 20.4 (quint.,  $J$  = 19.7 Hz); IR (neat):  $\tilde{\nu}$  = 2936, 2856, 2820, 2719, 2208, 2106, 1724, 1593, 1560, 1473, 1396, 1322, 1257, 1204, 1131, 1077, 1030, 956, 872, 819, 685, 658 cm<sup>-1</sup>; MS (ES<sup>+</sup>):  $m/z$  (rel. intensity): 355 (60), 353 (100) [M + MeOH + Na]; HRMS (ES<sup>+</sup>) calcd for (C<sub>16</sub>H<sub>16</sub>D<sub>2</sub><sup>35</sup>Cl<sub>2</sub>O + MeOH + Na): 353.1020; found: 353.1022; calcd for (C<sub>16</sub>H<sub>16</sub>D<sub>2</sub><sup>35</sup>Cl<sup>37</sup>ClO + MeOH + Na): 355.0991; found: 355.0997.

## Preparation of compound 8a

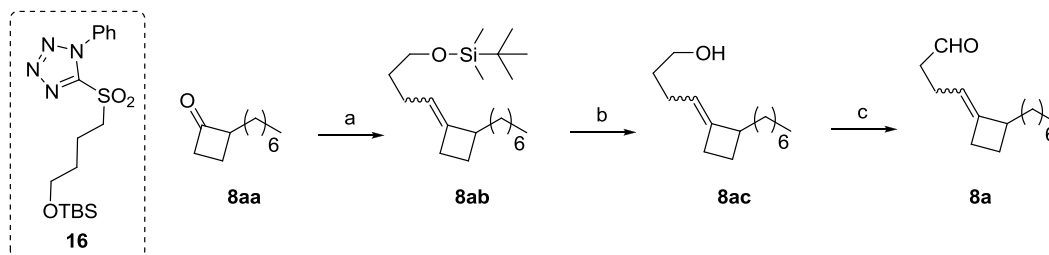

<sup>a</sup> **16**, NaHMDS, THF,  $-78\text{ }^{\circ}\text{C}$  to r.t.; 51%. <sup>b</sup> TBAF, THF; 95%. <sup>c</sup>  $(\text{COCl})_2$ , DMSO,  $\text{Et}_3\text{N}$ ,  $\text{CH}_2\text{Cl}_2$ ,  $-78\text{ }^{\circ}\text{C}$ ; 84%.

**Compound 8ab.** Sodium bis(trimethylsilyl)amide (320 mg, 1.8 mmol) was added as solid in one portion under  $\text{N}_2$  to a solution of **16** (653 mg, 1.65 mmol)<sup>1</sup> and **8aa** (252 mg, 1.5 mmol)<sup>2</sup> in THF (21 mL) at  $-78\text{ }^{\circ}\text{C}$ . The mixture was slowly allowed to warm to room temperature overnight while stirring by maintaining the flask dipped in the dry ice bath. The mixture was quenched with a saturated solution of  $\text{NH}_4\text{Cl}$  (10 mL) and extracted with EtOAc ( $3 \times 15\text{ mL}$ ). The organic layers were washed with brine, dried over  $\text{Na}_2\text{SO}_4$ , filtered and concentrated.

Purification by flash chromatography (petroleum ether/EtOAc, 150:1) gave **8ab** as a colorless oil (180 mg, 51%, partially inseparable mixture of *E/Z* isomers, ratio = 7:3). <sup>1</sup>H NMR (500 MHz,  $\text{CDCl}_3$ ):<sup>3</sup>  $\delta$  = 5.09–5.03 (m, 0.7H), [5.03–4.97 (m, 0.3H)], [3.59 (t,  $J$  = 6.5 Hz, 0.6H)], 3.58 (t,  $J$  = 6.5 Hz, 1.4H), [2.94–2.86 (m, 0.3H)], 2.85–2.76 (m, 0.7H), 2.62–2.40 (m, 2H), 2.07–1.98 (m, 1H), [1.95 (q,  $J$  = 7.5 Hz, 0.6H)], 1.90 (q,  $J$  = 7.5 Hz, 1.4H), 1.69–1.38 (m, 5H), 1.37–1.15 (m, 10H), 0.88 (s, 9H), 0.86 (t,  $J$  = 6.7 Hz, 3H), 0.03 (s, 6H); <sup>13</sup>C NMR (125 MHz,  $\text{CDCl}_3$ ):<sup>3</sup>  $\delta$  = 145.2, [143.7], [120.4], 118.3, [62.8], 62.7, 43.7, [42.8], 34.7, [34.4], [33.4], 33.0, 31.9, [29.75], 29.73, [29.40], 29.35, [28.1], 27.15, [27.11], 26.4, 26.0 (3C), [24.5], 24.0, 23.9, [22.9], 22.7, 18.3, 14.1, -5.3 (2C); IR (neat):  $\tilde{\nu}$  = 2955, 2925, 2855, 1463, 1254, 1099, 834, 773  $\text{cm}^{-1}$ ; HRMS (ES+) calcd for  $(\text{C}_{21}\text{H}_{42}\text{OSi} + \text{Na})$ : 361.2903; found: 361.2915.

**Compound 8ac.** TBAF (1.64 mL, 1.64 mmol (1M in THF)) was added via syringe to a solution of **8ab** (503 mg, 1.49 mmol) in THF (15 mL) at  $0\text{ }^{\circ}\text{C}$  under  $\text{N}_2$ . After stirring for 1h at room temperature, the mixture was quenched with a saturated solution of  $\text{NH}_4\text{Cl}$  (5 mL) and extracted with EtOAc ( $3 \times 15\text{ mL}$ ). The organic layers were washed with brine, dried over  $\text{Na}_2\text{SO}_4$ , filtered and concentrated. Purification by flash chromatography (petroleum ether/EtOAc, 15:1  $\rightarrow$  12:1  $\rightarrow$  10:1  $\rightarrow$  7:1) gave two fractions of colourless oil (150 mg, *E/Z* = 10:1 and 168 mg, *E/Z* = 1:1, 95% combined) which enabled the attributions of peaks to each isomers in the NMR spectra. <sup>1</sup>H NMR (500 MHz,  $\text{CDCl}_3$ ): (isomer *E*)  $\delta$  = 5.08 (tq,  $J$  = 7.3, 2.4 Hz, 1H), 3.68–3.59 (m, 2H), 2.85–2.76 (m, 1H), 2.56–2.42 (m, 2H), 2.03 (ddt,  $J$  = 11.0, 5.4, 8.9 Hz, 1H), 1.95 (q,  $J$  = 7.3 Hz, 2H), 1.59 (quint,  $J$  = 6.9 Hz, 2H), 1.55–1.45 (m, 2H), 1.36–1.12 (m, 11H), 0.86 (t,  $J$  = 7.0 Hz, 3H); characteristic signals of *Z* isomer:  $\delta$  = 5.02 (tq,  $J$  = 7.5, 2.2 Hz, 1H), 2.95–2.85 (m, 1H), 2.63–2.50 (m, 2H), 1.99 (q,  $J$  = 7.3 Hz, 2H); <sup>13</sup>C NMR (125 MHz,  $\text{CDCl}_3$ ):<sup>3</sup>  $\delta$  = 145.8, [144.3], [120.1], 118.0, 62.79, [62.77], 43.6, [42.8], 34.6, [34.4], [33.0], 32.6, 31.9, [29.71], 29.68, [29.4], 29.3, [28.1], 27.09, [27.07], 26.4, [24.5], 24.2, 23.8, [22.8], 22.7, 14.1; IR (neat):  $\tilde{\nu}$  = 3328 (br), 2922, 2853, 1456, 1054  $\text{cm}^{-1}$ ; MS (CI):  $m/z$  (rel. intensity): 242 (39) [ $\text{M} + \text{NH}_4$ ], 225 (25) [ $\text{M} + \text{H}$ ], 207 (12), 85 (100); elemental analysis (%) calcd for  $\text{C}_{15}\text{H}_{28}\text{O}$ : C 80.29, H 12.58; found: C 80.17, H 12.47.

<sup>2</sup> Nemoto, H.; Shiraki, M.; Fukumoto, K. *J. Org. Chem.* **1996**, *61*, 1347.

<sup>3</sup> Underlined chemical shifts are common to the *E* and *Z* isomers. Chemical shifts attributed to the *Z* isomer are given in brackets.

**Compound 8a.** This compound was obtained from **8ac** (224 mg, 1 mmol) using the Swern procedure followed for the preparation of **6**. (Colourless oil, 186 mg, 84%).  $^1\text{H}$  NMR (500 MHz,  $\text{CDCl}_3$ ):<sup>3</sup>  $\delta$  = [9.75 (t,  $J$  = 1.7 Hz, 0.4H)], 9.73 (t,  $J$  = 1.8 Hz, 0.6H), 5.04 (tq,  $J$  = 7.2, 2.4 Hz, 0.6H), [4.97 (tq,  $J$  = 7.4, 2.1, 0.4H)], [2.95–2.87 (m, 0.4H)], 2.85–2.76 (m, 0.6H), [2.63–2.44 (m, 1.2H)], 2.56–2.46 (m, 1.2H), 2.45–2.40 (m, 1.2H), [2.30–2.20 (m, 0.8H)], 2.21–2.15 (m, 1.2H), 2.08–1.97 (m, 1H), [1.70–1.59 (m, 0.4H)], 1.55–1.48 (m, 0.6H), [1.47–1.36 (m, 0.4H)], 1.34–1.14 (m, 12H), 0.89–0.82 (m, 3H);  $^{13}\text{C}$  NMR (125 MHz,  $\text{CDCl}_3$ ):<sup>3</sup>  $\delta$  = 202.7, [202.5], 146.8, [145.4], [118.3], 116.2, [44.2], 43.8, 43.6, [42.7], 34.5, [34.3], [31.9], 31.8, [29.67], 29.64, [29.33], 29.27, 27.0, 26.3, 23.7, [22.7], 22.6, [21.0], 20.8, 14.1; IR (neat):  $\tilde{\nu}$  = 2923, 2853, 2715, 1727, 1465, 1388, 1047, 821, 723  $\text{cm}^{-1}$ ; MS (CI):  $m/z$  (rel. intensity): 240 (100) [ $\text{M} + \text{NH}_4$ ], 223 (74) [ $\text{M} + \text{H}$ ], 205 (31), 95 (25); elemental analysis (%) calcd for  $\text{C}_{15}\text{H}_{26}\text{O}$ : C 81.02, H 11.79; found: C 81.16, H 12.41.

### Preparation of compound 8b

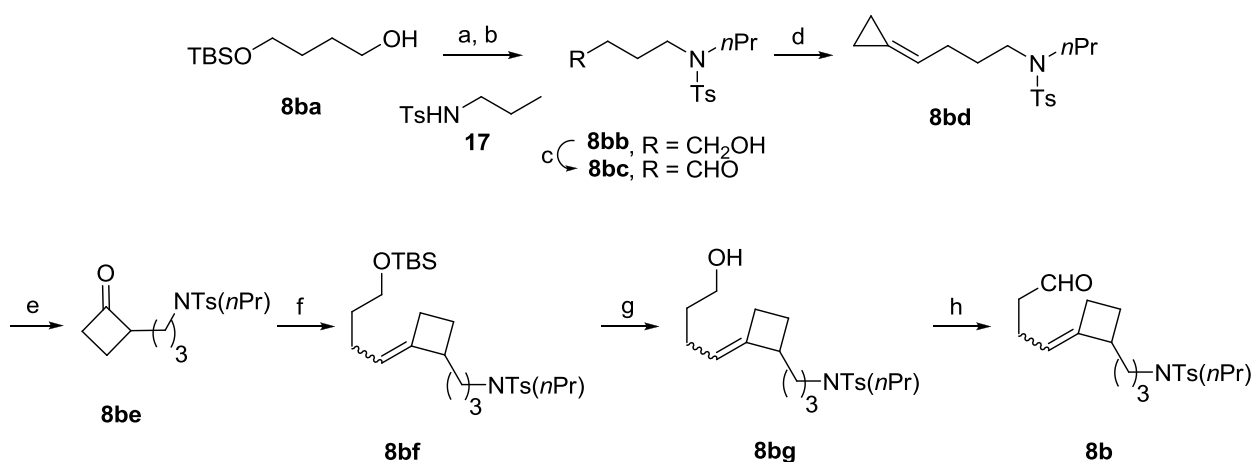

<sup>a</sup>  $\text{PPh}_3$ , **17**, DEAD, THF, 0 °C to r.t.. <sup>b</sup> TBAF, THF; 40% over two steps. <sup>c</sup>  $(\text{COCl})_2$ , DMSO,  $\text{Et}_3\text{N}$ ,  $\text{CH}_2\text{Cl}_2$ , -78 °C; 90%. <sup>d</sup> 1)  $\text{BrCH}_2\text{CH}_2\text{CH}_2\text{PPh}_3$ ,  $\text{Br}$ ,  $t\text{BuONa}$ , THF, reflux; 2) **8bd**, reflux; 45%. <sup>e</sup> 1) mCPBA,  $\text{CH}_2\text{Cl}_2$ , 0 °C to r.t.; 2)  $\text{LiI}$ ,  $\text{CH}_2\text{Cl}_2$ , reflux; 55%. <sup>f</sup> **16**, NaHMDS, THF, -78 °C to r.t.; 50%. <sup>g</sup> TBAF, THF; 93%. <sup>h</sup>  $(\text{COCl})_2$ , DMSO,  $\text{Et}_3\text{N}$ ,  $\text{CH}_2\text{Cl}_2$ , -78 °C; 93%.

**Compound 8bb.** A solution of commercially available **8ba** (1.5g, 7.35 mmol) in THF (5 mL) was added via canula to a solution of  $\text{PPh}_3$  (2.12 g, 8.09 mmol) and **17** (1.73 g, 8.09 mmol) in THF (70 mL) at 0 °C under  $\text{N}_2$ . Then diethyldiazodicarboxylate (DEAD) (1.27 mL, 8.09 mmol) was added via syringe within 2 minutes. After stirring overnight at r.t., all volatiles were evaporated and purification by flash chromatography (PE/EtOAc, 20/1  $\rightarrow$  15/1  $\rightarrow$  10/1  $\rightarrow$  7/1  $\rightarrow$  4/1) gave 1.36 g of colourless oil which immediately dissolved in THF (10 mL) and treated at 0 °C with TBAF (3.6 mL). After stirring for 1h, the mixture was quenched with a saturated solution of  $\text{NH}_4\text{Cl}$  (10 mL) and diluted with EtOAc (30 mL). The aqueous layer was extracted with EtOAc (10 mL) and the combined organic layers were washed with brine, dried over  $\text{Na}_2\text{SO}_4$ , filtered and concentrated. Purification by flash chromatography (PE/EtOAc, 3/1  $\rightarrow$  2/1  $\rightarrow$  1/1) gave **8bb** as a pale yellow oil (828 mg, 40% over two steps).  $^1\text{H}$  NMR (500 MHz,  $\text{CDCl}_3$ ):  $\delta$  = 7.65 (d,  $J$  = 8.2 Hz, 2H), 7.27 (d,  $J$  = 8.1 Hz, 2H), 3.61 (t,  $J$  = 6.3 Hz, 2H), 3.13–3.08 (m, 2H), 3.06–3.01 (m, 2H), 2.39 (s, 3H), 2.06–1.95 (m, 1H(OH)), 1.67 (m, 2H), 1.57–1.47 (m, 4H), 0.84 (t,  $J$  = 7.3 Hz, 3H);  $^{13}\text{C}$  NMR (125 MHz,  $\text{CDCl}_3$ ):  $\delta$  = 142.9, 136.8, 129.5 (2C), 126.9 (2C), 62.1, 50.0, 48.0, 29.5, 25.2, 21.9, 21.4, 11.1; IR (neat):  $\tilde{\nu}$  = 3480 (br), 2935, 2875, 1598, 1494, 1459, 1381, 1331, 1152, 1089, 1002, 845, 727  $\text{cm}^{-1}$ ; HRMS (ES+) calcd for  $(\text{C}_{14}\text{H}_{23}\text{NO}_3\text{S} + \text{Na})$ : 308.1296; found: 308.1291.

**Compound 8bc.** This compound was obtained from **8bb** (800 mg, 2.81 mmol) using the Swern procedure followed for the preparation of **6**. Purification by flash chromatography (PE/EtOAc, 3/1) gave **8bc** as a pale yellow oil (717 mg, 90%). <sup>1</sup>H NMR (500 MHz, CDCl<sub>3</sub>): δ = 9.78–9.76 (m, 1H), 7.65 (d, *J* = 8.1 Hz, 2H), 7.27 (d, *J* = 8.0 Hz, 2H), 3.09 (t, *J* = 7.2 Hz, 2H), 3.06–3.00 (m, 2H), 2.55 (t, *J* = 7.0 Hz, 2H), 2.40 (s, 3H), 1.85 (quint., *J* = 7.1 Hz, 2H), 1.56–1.47 (m, 2H), 0.84 (t, *J* = 7.4 Hz, 3H); <sup>13</sup>C NMR (125 MHz, CDCl<sub>3</sub>): δ = 201.4, 143.1, 136.6, 129.6 (2C), 127.0 (2C), 50.5, 47.4, 40.6, 21.9, 21.4, 21.2, 11.1; IR (neat):  $\tilde{\nu}$  = 2966, 2935, 2876, 2726, 1721, 1598, 1494, 1459, 1333, 1154, 1089, 980, 815, 731 cm<sup>-1</sup>; HRMS (ES<sup>+</sup>) calcd for (C<sub>14</sub>H<sub>21</sub>NO<sub>3</sub>S + Na): 306.1140; found: 306.1140; elemental analysis (%) calcd for C<sub>14</sub>H<sub>21</sub>NO<sub>3</sub>S: C 59.34, H 7.47, N 4.94; found: C 58.70, H 7.42, N 5.46.

**Compound 8bd.** *t*-BuONa (485 mg, 5.05 mmol) was added as solid in 3 portions at room temperature and under N<sub>2</sub> to a solution of 3-(bromopropyl)triphenylphosphonium bromide (1.17 g, 2.53 mmol) in THF (15 mL). Then, the suspension was heated to reflux for 2 hours (oil bath temperature = 74 °C), before adding a solution of **8bc** (650 mg, 2.27 mmol) in THF (2 mL) via canula. After 2.5 hours heating, the crude mixture was quenched at room temperature with H<sub>2</sub>O (5 mL). The aqueous layer was extracted with ethyl acetate (2 × 20 mL) and the combined organic layers were washed with brine, dried over Na<sub>2</sub>SO<sub>4</sub>, filtered and concentrated. Purification by flash chromatography (PE/EtOAc: 200/1 → 10/1 → 3/1) gave compound **8bd** as colorless oil (312 mg, 45%). <sup>1</sup>H NMR (500 MHz, CDCl<sub>3</sub>): δ = 7.65 (d, *J* = 8.2 Hz, 2H), 7.26 (d, *J* = 8.3 Hz, 2H), 5.72–5.66 (m, 1H), 3.12–3.00 (m, 4H), 2.39 (s, 3H), 2.13 (q, *J* = 7.3 Hz, 2H), 1.65 (quint., *J* = 7.7 Hz, 2H), 1.57–1.48 (m, 2H), 1.03–0.94 (m, 4H), 0.85 (t, *J* = 7.4 Hz, 3H); <sup>13</sup>C NMR (125 MHz, CDCl<sub>3</sub>): δ = 142.8, 137.0, 129.5 (2C), 127.0 (2C), 122.0, 116.8, 50.0, 48.0, 29.0, 28.3, 22.0, 21.4, 11.1, 2.1, 1.8; IR (neat):  $\tilde{\nu}$  = 2971, 2934, 2875, 1599, 1494, 1459, 1337, 1154, 1090, 962, 814, 730 cm<sup>-1</sup>; HRMS (ES<sup>+</sup>) calcd for (C<sub>16</sub>H<sub>25</sub>NO<sub>2</sub>S + Na): 330.1504; found: 330.1505.

**Compound 8be.** mCPBA (202 mg, 1.18 mmol) was added as solid in one portion to a solution of **8bd** (300 mg, 0.98 mmol) in CH<sub>2</sub>Cl<sub>2</sub> (5 mL) at 0 °C. After stirring at r.t. for 20 hours, the mixture was quenched with a saturated solution of NaHCO<sub>3</sub>. The aqueous layer was extracted with CH<sub>2</sub>Cl<sub>2</sub> and the combined organic layers were washed with brine, dried over Na<sub>2</sub>SO<sub>4</sub>, filtered and concentrated. This material was diluted in CH<sub>2</sub>Cl<sub>2</sub> (1 mL) and LiI (5 mg, 0.037 mmol) was added under N<sub>2</sub>. After heating at reflux for 3h, the mixture was diluted with CH<sub>2</sub>Cl<sub>2</sub>, washed with brine and concentrated. Purification by flash chromatography (PE/EtOAc, 4/1) gave **8be** as a colorless oil (172 mg, 54%). <sup>1</sup>H NMR (500 MHz, CDCl<sub>3</sub>): δ = 7.64 (d, *J* = 8.2 Hz, 2H), 7.26 (d, *J* = 8.2 Hz, 2H), 3.29–3.19 (m, 1H), 3.12–2.95 (m, 5H), 2.92–2.82 (m, 1H), 2.39 (s, 3H), 2.15 (qd, *J* = 10.6, 5.2 Hz, 1H), 1.67–1.54 (m, 4H), 1.54–1.44 (m, 3H), 0.83 (t, *J* = 7.5 Hz, 3H); <sup>13</sup>C NMR (125 MHz, CDCl<sub>3</sub>): δ = 211.5, 143.0, 136.8, 129.6 (2C), 127.0 (2C), 59.7, 50.1, 47.9, 44.4, 26.6, 26.2, 21.9, 21.4, 16.8, 11.1; IR (neat):  $\tilde{\nu}$  = 2967, 2932, 2875, 1773, 1598, 1494, 1459, 1335, 1154, 1089, 960, 815, 719 cm<sup>-1</sup>; HRMS (ES<sup>+</sup>) calcd for (C<sub>16</sub>H<sub>25</sub>NO<sub>3</sub>S + Na): 346.1453; found: 346.1447.

**Compound 8bf.** This compound was obtained from **8be** (160 mg, 0.49 mmol), using the procedure described for the preparation of **8ab**. Purification by flash chromatography (PE/EtOAc, 15/1) gave **8bf** as a inseparable mixture of *E* and *Z* isomers (6:4) (Colorless oil, 122 mg, 50%). <sup>1</sup>H NMR (500 MHz, CDCl<sub>3</sub>): δ = 7.66 (d, *J* = 8.1 Hz, 2H), 7.26 (d, *J* = 8.1 Hz, 2H), 5.05–4.97 (m, 1H), 3.61–3.53 (m, 2H), 3.10–3.00 (m, 4H), [2.91–2.83 (m, 0.4H)], 2.82–2.73 (m, 0.6 H), 2.60–2.42 (m, 2H), 2.39 (s, 3H), 2.06–1.96 (m, 1H), 1.95–1.85 (m, 2H), 1.63–1.25 (m, 9H), 0.871 (s, 5H), [0.865 (s, 4H)], 0.85 (t, *J* = 7.3 Hz, 3H), 0.02 (s, 6H);

$^{13}\text{C}$  NMR (125 MHz,  $\text{CDCl}_3$ ):  $\delta$  = 144.3, 142.8, [142.7], 137.1, 129.5 (2C), 127.1 (2C), [120.9], 118.8, [62.7], 62.6, [50.0], 49.9, [48.34], 48.25, 43.0, [42.1], [33.2], 32.9, 31.6, [31.3], [28.0], 26.33, [26.30], 26.2, 25.9 (3C), [24.4], 24.0, 23.6, [22.7], [21.99], 21.95, 21.4, [18.30], 18.28, 11.2, -5.3 (2C); IR (neat):  $\tilde{\nu}$  = 2929, 2856, 1599, 1495, 1463, 1341, 1253, 1157, 1091, 1040, 1020, 1005, 959, 834, 814, 774, 724  $\text{cm}^{-1}$ ; HRMS (ES+) calcd for ( $\text{C}_{27}\text{H}_{47}\text{NO}_3\text{SSi} + \text{Na}$ ): 516.2944; found: 516.2956.

**Compound 8bg.** This compound was obtained from 11bf (144 mg, 0.292 mmol) using the procedure described for the preparation of **8ac**. Purification by flash chromatography (PE/EtOAc, 4/1  $\rightarrow$  3/1) gave **8bg** as an inseparable mixture of *E* and *Z* isomers (6:4) (colorless oil, 103 mg, 93%).

OH

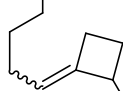
 $(\text{CH}_2)_3\text{NTsPr}$ 

$^1\text{H}$  NMR (500 MHz,  $\text{CDCl}_3$ ):  $\delta$  = 7.65 (d,  $J$  = 8.1 Hz, 2H), 7.26 (d,  $J$  = 8.1 Hz, 2H), 5.08–4.98 (m, 1H), 3.66–3.54 (m, 2H), 3.15–2.98 (m, 4H), [2.95–2.86 (m, 0.4H)], 2.83–2.73 (m, 0.6 H), 2.61–2.40 (m, 2H), 2.38 (s, 3H), 2.06–1.85 (m, 4H), [1.70–1.61 (m, 0.4H)], 1.60–1.39 (m, 8H), 1.34–1.25 (m, 0.6H), 0.89–0.78 (m, 3H);  $^{13}\text{C}$  NMR (125 MHz,  $\text{CDCl}_3$ ):  $\delta$  = 144.6, [143.03], [142.85], 142.8, 136.93, [136.89], [129.46 (2C)], 129.44 (2C), 126.94 (2C), [126.92 (2C)], [120.7], 118.5, [62.4], 62.3, [49.9], 49.8, [48.3], 48.2, 42.9, [42.1], [32.9], 32.5, 31.4, [31.3], [27.9], 26.3, 26.1, [26.0], [24.4], 24.0, 23.5, [22.5], 21.9, 21.3, 11.1; IR (neat):  $\tilde{\nu}$  = 3403 (br), 2932, 2874, 1598, 1494, 1457, 1379, 1334, 1305, 1153, 1090, 1042, 1020, 960, 814, 724  $\text{cm}^{-1}$ ; HRMS (ES+) calcd for ( $\text{C}_{21}\text{H}_{33}\text{NO}_3\text{S} + \text{Na}$ ): 402.2079; found: 402.2075.

**Compound 8b.** This compound was obtained from **8bg** (100 mg, 0.263 mmol) using the Swern procedure followed for the preparation of **6**. Purification by flash chromatography (PE/EtOAc, 10/1) gave **8b** as an

CHO

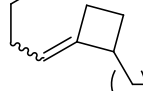
 $(\text{CH}_2)_3\text{NTsPr}$ 

inseparable mixture of *E* and *Z* isomers (6:4) (colorless oil, 92 mg, 93%).  $^1\text{H}$  NMR (500 MHz,  $\text{CDCl}_3$ ):  $\delta$  = [9.73–9.71 (m, 0.4H)], 9.71–9.69 (m, 0.6H), 7.66–7.60 (m, 2H), 7.24 (d,  $J$  = 7.5 Hz, 2H), 5.03–4.93 (m, 1H), 3.12–2.97 (m, 4H), [2.93–2.83 (m, 0.4H)], 2.71–2.59 (m, 0.6H), 2.59–2.34 (m, 4H), 2.37 (s, 3H), 2.25–2.11 (m, 2H), 2.06–1.94 (m, 1H), [1.66–1.57 (m, 0.4H)], 1.56–1.36 (m, 6H), 1.34–1.23 (m, 0.6H), 0.83 (t,  $J$  = 7.3 Hz, 3H);  $^{13}\text{C}$  NMR (125 MHz,  $\text{CDCl}_3$ ):  $\delta$  = 202.45, [202.38], 145.8, [144.4], [142.84], 142.81, 136.9, [129.47 (2C)], 129.45 (2C), 127.0 (2C), [118.9], 116.8, [50.0], 49.9, [48.3], 48.2, [44.0], 43.7, 42.8, [42.0], 31.3, [31.1], [27.9], 26.3, [26.2], 26.1, 23.4, [22.5], [21.93], 21.89, 21.4, [20.9], 20.6, 11.1; IR (neat):  $\tilde{\nu}$  = 2934, 2875, 2722, 1722, 1599, 1494, 1459, 1381, 1336, 1154, 1090, 1041, 1020, 993, 960, 815, 724  $\text{cm}^{-1}$ ; MS (ES+):  $m/z$  (rel. intensity): 432 (54) [ $\text{M} + \text{MeOH} + \text{Na}$ ], 400 (100) [ $\text{M} + \text{Na}$ ]; HRMS (ES+) calcd for ( $\text{C}_{21}\text{H}_{31}\text{NO}_3\text{S} + \text{Na}$ ): 400.1922; found: 400.1905.

Preparation of compound **8c**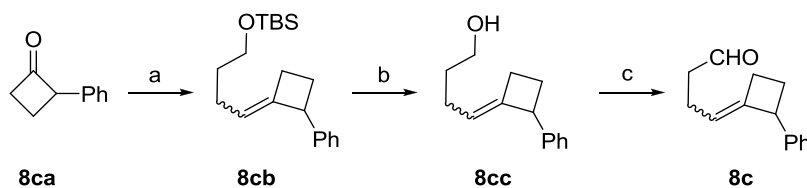

<sup>a</sup> **16**, LiHMDS, toluene,  $-78\text{ }^{\circ}\text{C}$  to r.t.; 66%. <sup>b</sup> TBAF, THF; 90%. <sup>c</sup> (COCl)<sub>2</sub>, DMSO, Et<sub>3</sub>N, CH<sub>2</sub>Cl<sub>2</sub>,  $-78\text{ }^{\circ}\text{C}$ ; 55–63%.

**Compound 8cb.** Lithium bis(trimethylsilyl)amide (327 mg, 2.01 mmol) was added as solid in one portion under N<sub>2</sub> to a solution of **16** (650 mg, 1.64 mmol)<sup>1</sup> and commercially available **8ca** (184 mg, 1.26 mmol) in toluene (12 mL) at  $-78\text{ }^{\circ}\text{C}$ . The mixture was slowly allowed to warm to room temperature overnight while stirring by maintaining the flask dipped in the dry ice bath. The mixture was quenched with a saturated solution of NH<sub>4</sub>Cl (10 mL) and extracted with EtOAc (3 × 15 mL). The organic layers were washed with brine, dried over Na<sub>2</sub>SO<sub>4</sub>, filtered and concentrated. Purification by flash chromatography (petroleum ether/EtOAc, 50:1) gave **8cb** as an inseparable mixture of *E* and *Z* isomers (1:1) (Colorless oil, 265 mg, 66%).

<sup>1</sup>H NMR (500 MHz, CDCl<sub>3</sub>):<sup>3</sup>  $\delta$  = 7.31–7.23 (m, 4H), 7.19–7.14 (m, 1H), [5.20 (tq, *J* = 7.4, 2.3 Hz, 0.5H), 5.03 (tq, *J* = 7.4, 2.5 Hz, 0.5H), 4.13–4.02 (m, 1H), 3.58 (t, *J* = 6.6 Hz, 1H), [3.41 (dt, *J* = 10.2, 6.8 Hz, 0.5H)], [3.35 (dt, *J* = 10.1, 6.6 Hz, 0.5H)], [2.77–2.61 (m, 1H)], 2.68–2.62 (m, 1H), [2.43 (dtd, *J* = 11.3, 9.4, 6.4 Hz, 0.5H)], 2.37 (ddt, *J* = 10.8, 9.3, 6.9 Hz, 0.5H), 2.08–1.93 (m, 1.5H), [1.91 (ddt, *J* = 11.2, 10.1, 6.1 Hz, 0.5H)], [1.76–1.68 (m, 0.5H)], [1.66–1.58 (m, 0.5H)], 1.53 (quint., *J* = 7.0 Hz, 1H), 1.43–1.32 (m, 0.5H), 0.87 (s, 4.5H), [0.82 (s, 4.5H)], 0.02 (s, 3H), [-0.04 (s, 1.5H)], [-0.05 (s, 1.5H)]; <sup>13</sup>C NMR (125 MHz, CDCl<sub>3</sub>):<sup>3</sup>  $\delta$  = [144.5], 143.8, 143.3, [141.7], [128.3 (2C)], 128.2 (2C), 127.4 (2C), [127.2 (2C)], 126.0, [125.9], [122.4], 120.7, [62.8], 62.6, 48.6, [47.7], 32.8, [32.6], [28.3], [27.1], 26.8, 26.4, 26.0 (3C), [25.9 (3C)], [24.1], 24.0, 18.32, [18.28], -5.28 (2C), [-5.33 (2C)]; IR (neat):  $\tilde{\nu}$  = 3062, 3027, 2950, 2929, 2856, 1603, 1494, 1472, 1463, 1388, 1361, 1254, 1097, 1031, 1006, 963, 939, 833, 773, 697, 661, 597, 542, 531, 522 cm<sup>-1</sup>; MS (ES<sup>+</sup>): *m/z* (rel. intensity): 339 (100); HRMS (ES<sup>+</sup>) calcd for (C<sub>20</sub>H<sub>32</sub>OSi + Na): 339.2120; found: 339.2117.

**Compound 8cc.** This compound was obtained from **8cb** (348 mg, 1.1 mmol) using the procedure followed for the preparation of **8ac**. Partial separation by flash chromatography (petroleum ether/Et<sub>2</sub>O, 10/1 → 3/1) and purification by preparative TLC (petroleum ether/EtOAc, 3/1) gave two fractions of **8cc**, both as colorless oil: 1) *E/Z* = 3:1 (147 mg, 66%), 2) *Z* isomer only (54 mg, 24%). This enabled the attribution of NMR signals for *E* and *Z* isomers for **8cc** and the mixture of isomers of **8cb**.

<sup>1</sup>H NMR (500 MHz, CDCl<sub>3</sub>): (*E* isomer)  $\delta$  = 7.25–7.21 (m, 4H), 7.20–7.15 (m, 1H), 5.05 (tq, *J* = 7.4, 2.5 Hz, 1H), 4.10–4.03 (m, 1H), 3.63 (q, *J* = 6.2 Hz, 2H), 2.76–2.62 (m, 2H), 2.37 (ddt, *J* = 11.0, 9.3, 6.9 Hz, 1H), 2.10–1.98 (m, 3H), 1.60 (quint., *J* = 6.9 Hz, 2H), 1.22 (t, *J* = 5.4 Hz, 1H(OH)); (*Z* isomer)  $\delta$  = 7.31–7.26 (m, 4H), 7.20–7.15 (m, 1H), 5.19 (tq, *J* = 7.5, 2.3 Hz, 1H), 4.14–4.08 (m, 1H), 3.38 (q, *J* = 6.0 Hz, 2H), 2.80–2.62 (m, 2H), 2.44 (dtd, *J* = 11.3, 9.4, 6.3 Hz, 1H), 1.95 (ddt, *J* = 11.3, 10.1, 6.7 Hz, 1H), 1.77–1.68 (m, 2H), 1.49–1.40 (m, 1H), 1.39–1.30 (m, 1H), 0.86 (t, *J* = 5.9 Hz, 1H(OH)); <sup>13</sup>C NMR (125 MHz, CDCl<sub>3</sub>): (*E* isomer)  $\delta$  = 143.9, 143.5, 128.2 (2C), 127.3 (2C), 126.0, 120.3, 62.5, 48.6, 32.4, 26.7, 26.2, 24.1; (*Z* isomer)  $\delta$  = 144.5, 142.6, 128.4 (2C), 127.2 (2C), 126.0, 122.1, 62.3, 47.8, 32.2, 28.3, 26.9, 23.8; IR (neat):  $\tilde{\nu}$  = 3343 (br), 3061, 3026, 2938, 2876, 1699, 1602, 1492, 1452, 1047, 1031, 917, 868, 837, 758, 744, 698 cm<sup>-1</sup>; MS (CI): *m/z* (rel. intensity): 220 (100) [M + NH<sub>4</sub>], 203 (15) [M + H], 85 (23); elemental analysis (%) calcd for C<sub>14</sub>H<sub>18</sub>O: C 83.12, H 8.97; found: C 83.57, H 9.11.



The geometry of the olefin in **8cc** was confirmed on a *E/Z* (6:4) mixture by nOe experiments.

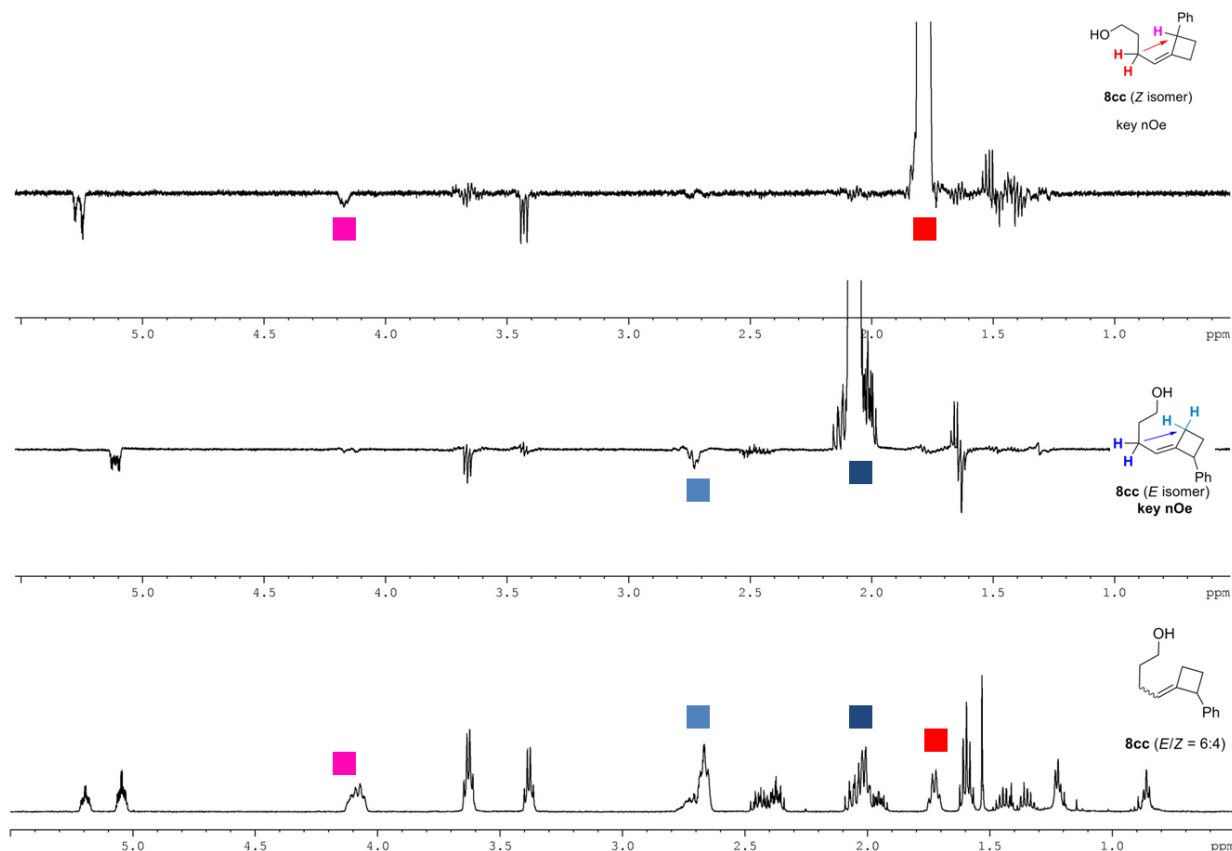

**Compound 8c.** Two batches of this compound were obtained by Swern oxidation of alcohol **8cb**: 1) a *E/Z* (3:1) mixture (pale yellow oil, 81 mg, 55%), 2) the pure *Z* isomer (colourless oil, 28 mg, 63%). <sup>1</sup>H NMR (500 MHz, CDCl<sub>3</sub>): (*E* isomer)  $\delta$  = 9.74 (t,  $J$  = 1.7 Hz, 1H), 7.24–7.21 (m, 4H), 7.20–7.15 (m, 1H), 5.01 (tq,  $J$  = 7.3, 2.5 Hz, 1H), 4.10–4.03 (m, 1H), 2.76–2.62 (m, 2H), 2.44 (td,  $J$  = 7.2, 1.8 Hz, 2H), 2.38 (ddt,  $J$  = 11.0, 9.3, 6.9 Hz, 1H), 2.29–2.23 (m, 2H), 2.06 (dtd,  $J$  = 10.8, 8.9, 8.0 Hz, 1H); (*Z* isomer)  $\delta$  = 9.49 (t,  $J$  = 1.9 Hz, 1H), 7.31–7.24 (m, 4H), 7.20–7.15 (m, 1H), 5.18 (tq,  $J$  = 7.5, 2.2 Hz, 1H), 4.15–4.08 (m, 1H), 2.78–2.62 (m, 2H), 2.44 (dtd,  $J$  = 11.2, 9.4, 6.4 Hz, 1H), 2.29–2.12 (m, 2H), 2.04–1.89 (m, 3H); <sup>13</sup>C NMR (125 MHz, CDCl<sub>3</sub>): (*E* isomer)  $\delta$  = 202.3, 145.2, 143.2, 128.3 (2C), 127.3 (2C), 126.1, 118.6, 48.6, 43.6, 26.7, 26.1, 20.7; (*Z* isomer)  $\delta$  = 202.4, 144.2, 143.9, 128.5 (2C), 127.2 (2C), 126.2, 120.3, 47.8, 43.4, 28.3, 26.9, 20.6; IR (neat):  $\tilde{\nu}$  = 3058, 3026, 2947, 2916, 2851, 2825, 2719, 1724, 1601, 1493, 1454, 1408, 1389, 1078, 1031, 838, 747, 700 cm<sup>-1</sup>; MS (ES<sup>+</sup>):  $m/z$  (rel. intensity): 255 (100) [M + MeOH + Na]; HRMS (ES<sup>+</sup>) calcd for (C<sub>14</sub>H<sub>17</sub>O + MeOH + Na): 255.1361; found: 255.1357.

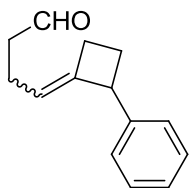

Preparation of compound **8d**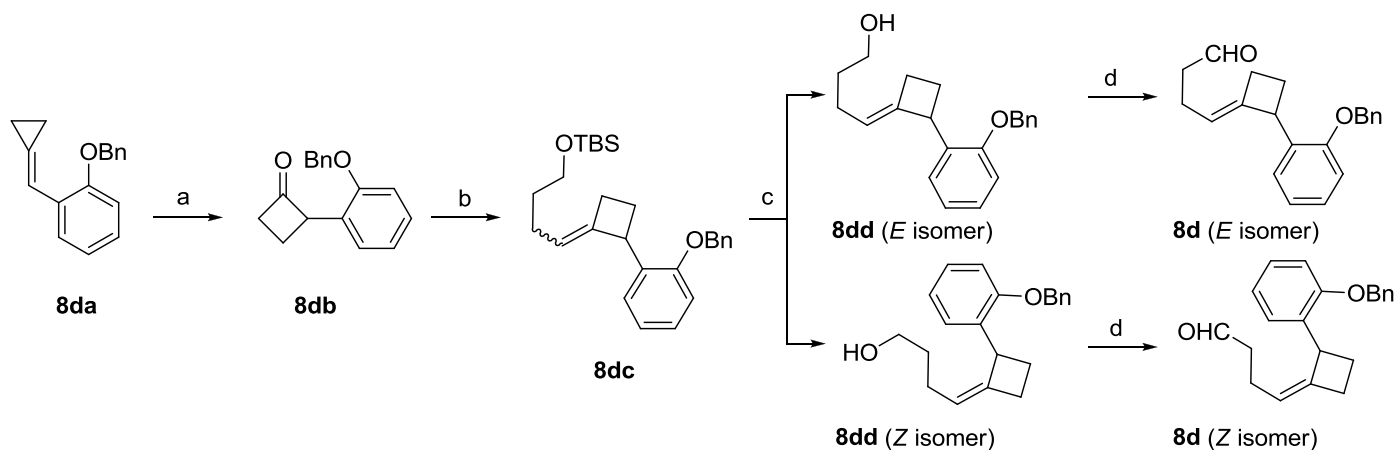

<sup>a</sup> mCPBA, CH<sub>2</sub>Cl<sub>2</sub>, r.t.; 45%. <sup>b</sup> **16**, NaHMDS, THF, -78 °C to r.t.; 39%. <sup>c</sup> TBAF, THF, then separation by preparative TLC; 22% (*E*) + 16% (*Z*). <sup>d</sup> (COCl)<sub>2</sub>, DMSO, Et<sub>3</sub>N, CH<sub>2</sub>Cl<sub>2</sub>, -78 °C; 47% (*E*); 56% (*Z*).

**Compound 8db.** mCPBA (3.35g, 14.7 mmol, 75% w/w) was added in one portion to **8da**<sup>4</sup> (2.89 g, 12.3 mmol) in CH<sub>2</sub>Cl<sub>2</sub> (45 mL). After stirring for 2h at r.t., the mixture was quenched carefully with a saturated solution of NaHCO<sub>3</sub> (30 mL) and diluted with CH<sub>2</sub>Cl<sub>2</sub> (15 mL). The aqueous layer was extracted with CH<sub>2</sub>Cl<sub>2</sub> (15 mL). The combined organic layers were washed with brine (10 mL), dried over Na<sub>2</sub>SO<sub>4</sub>, filtered and concentrated. Purification by flash chromatography after solid deposition (petroleum ether/EtOAc, 15/1 → 10/1) gave **8db** as a white solid (1.38 g, 45%). m.p.: 56–59 °C; <sup>1</sup>H NMR (500 MHz, CDCl<sub>3</sub>): δ = 7.43–7.35 (m, 4H), 7.34–7.30 (m, 1H), 7.23–7.18 (m, 1H), 7.12 (dd, *J* = 7.6, 1.7 Hz, 1H), 6.92 (d, *J* = 8.0 Hz, 1H), 6.89 (td, *J* = 7.4, 1.0 Hz, 1H), 5.02 (s, 2H), 4.46 (ddt, *J* = 10.6, 8.1, 2.5 Hz, 1H), 3.01 (dddd, *J* = 18.1, 10.3, 7.9, 2.3 Hz, 1H), 2.80 (dddd, *J* = 17.6, 9.7, 4.8, 2.8 Hz, 1H), 2.34 (qd, *J* = 10.7, 4.9 Hz, 1H), 2.21 (ddt, *J* = 10.8, 9.7, 8.0 Hz, 1H); <sup>13</sup>C NMR (125 MHz, CDCl<sub>3</sub>): δ = 209.3, 156.5, 136.5, 129.5, 128.6, 128.5 (2C), 128.1, 127.8 (2C), 126.1, 120.8, 111.7, 70.3, 62.0, 44.9, 18.1; IR (neat):  $\tilde{\nu}$  = 3058, 3028, 2997, 2952, 2920, 2886, 1779, 1597, 1583, 1491, 1467, 1454, 1381, 1336, 1295, 1264, 1233, 1211, 1180, 1158, 1117, 1078, 1034, 1009, 960, 918, 882, 854, 811, 765, 747, 730, 695 cm<sup>-1</sup>; MS (CI): *m/z* (rel. intensity): 270 (100), 253 (9); HRMS (CI) calcd for (C<sub>17</sub>H<sub>16</sub>O<sub>2</sub> + NH<sub>4</sub>): 270.1489; found: 270.1488; elemental analysis (%) calcd for C<sub>17</sub>H<sub>16</sub>O<sub>2</sub>: C 80.93, H 6.39; found: C 80.73, H 6.41.

**Compound 8dc.** This compound was obtained from **8db** (504 mg, 2 mmol) according the procedure described for **8ab**. Colorless oil (316 mg, 39%, mixture of *E* and *Z* isomers (7:3)). <sup>1</sup>H NMR (500 MHz, CDCl<sub>3</sub>):<sup>3</sup> δ = 7.47–7.42 (m, 2H), 7.41–7.36 (m, 3H), 7.35–7.29 (m, 1H), 7.14 (t, *J* = 7.2 Hz, 1H), 6.95 (t, *J* = 7.5 Hz, 1H), 6.90 (d, *J* = 8.4 Hz, 1H), [5.27 (tq, *J* = 7.4, 2.3 Hz, 0.3H)], 5.12 (tq, *J* = 7.5, 2.3 Hz, 0.7H), 5.07 (s, 2H), 4.59–4.45 (m, 1H), 3.62 (t, *J* = 6.6 Hz, 1.4H), [3.50–3.42 (m, 0.6H)], [2.77–2.57 (m, 0.6H)], 2.69–2.62 (m, 1.4H), [2.53–2.44 (m, 0.3H)], 2.46–2.35 (m, 0.7H), 2.06–1.94 (m, 2.1H), [1.90–1.82 (m, 0.3H)], [1.81–1.70 (m, 0.6H)], 1.57 (quint., *J* = 7.0 Hz, 1.4H), [1.46 (quint., *J* = 7.0 Hz, 0.6H)], 0.90 (s, 6.3H), [0.84 (s, 2.7H)], 0.052 (s, 2.1H), 0.051 (s, 2.1H), [–0.02 (s, 0.9H)], [–0.03 (s, 0.9H)]; <sup>13</sup>C NMR (125 MHz, CDCl<sub>3</sub>): δ = 156.3, [155.9], 142.5, [141.1], 137.5, [132.7], 132.6, 128.5 (2C), 127.7, 127.67, [127.62], 127.4, 127.1 (2C), 127.0, [122.5], 121.1, 120.7, 111.6, [111.5], 69.9, [69.8], [62.9], 62.8, 42.5, [41.7], 32.9, [32.7], [28.1], 26.6, [26.2], 26.0 (3C), [25.9 (3C)], 25.7, [24.3],

<sup>4</sup> Shi, M.; Liu, L. P.; Tang, J. *J. Am. Chem. Soc.* **2006**, 128, 7430.

24.1, [18.4], 18.3, -5.25 (2C), [-5.31 (2C)]; IR (neat):  $\tilde{\nu}$  = 3064, 3028, 2942, 2929, 2857, 1599, 1583, 1490, 1469, 1451, 1382, 1360, 1285, 1241, 1100, 1052, 1026, 963, 835, 812, 775, 750, 696  $\text{cm}^{-1}$ ; HRMS (ES+) calcd for ( $\text{C}_{27}\text{H}_{38}\text{O}_2\text{Si} + \text{Na}$ ): 445.2539; found: 445.2522; elemental analysis (%) calcd for  $\text{C}_{27}\text{H}_{38}\text{O}_2\text{Si}$ : C 76.72, H 9.06; found: C 76.51, H 9.11.

**Compound 8dd.** This compound was prepared from **8dc** (475 mg, 1.16 mmol) according to the procedure described for the preparation of **8ac**. Purification by flash chromatography (petroleum ether/EtOAc, 5.5/1)

followed by preparative TLC (petroleum ether/EtOAc, 4:1 (2 migrations)) gave 2 fractions (77 mg, 22%, *E/Z* = 20:1) and (56 mg, 16%, *E/Z* = 1:14), both obtained as colorless oils.  $^1\text{H}$  NMR (500 MHz,  $\text{CDCl}_3$ ): (*E* isomer)  $\delta$  = 7.42–7.39 (m, 2H), 7.38–7.34 (m, 3H), 7.32–7.27 (m, 1H), 7.18–7.12 (m, 1H), 6.93 (t,  $J$  = 7.5 Hz, 1H), 6.89 (d,  $J$  = 8.2 Hz, 1H), 5.11 (tq,  $J$  = 7.5, 2.5 Hz, 1H), 5.06 (s, 2H), 4.53–4.45 (m, 1H), 3.62 (q,  $J$  = 6.1 Hz, 2H), 2.69–2.58 (m, 2H), 2.38 (ddt,  $J$  = 10.7, 9.7, 7.2, 1H), 2.06–1.97 (m, 3H), 1.60 (quint.,  $J$  = 6.9 Hz, 2H), 1.21 (t,  $J$  = 5.1 Hz, 1H(OH)); (*Z* isomer)  $\delta$  = 7.44 (d,  $J$  = 7.4 Hz, 2H), 7.39 (t,  $J$  = 7.5 Hz, 2H), 7.36–7.29 (m, 2H), 7.18 (td,  $J$  = 7.8, 1.7 Hz, 1H), 6.95 (t,  $J$  = 7.5 Hz, 1H), 6.92 (d,  $J$  = 8.3 Hz, 1H), 5.24 (tq,  $J$  = 7.4, 2.3 Hz, 1H), 5.08 (s, 2H), 4.56–4.48 (m, 1H), 3.44 (td,  $J$  = 6.4, 2.4 Hz, 2H), 2.77–2.67 (m, 1H), 2.67–2.59 (m, 1H), 2.46 (dtd,  $J$  = 11.1, 9.5, 6.8 Hz, 1H), 1.92 (tt,  $J$  = 10.9, 6.0 Hz, 1H), 1.85–1.74 (m, 2H), 1.55–1.39 (m, 2H), 1.37–1.21 (m, 1H(OH));  $^{13}\text{C}$  NMR (125 MHz,  $\text{CDCl}_3$ ): (*E* isomer)  $\delta$  = 156.2, 143.1, 137.3, 132.3, 128.4 (2C), 127.6, 127.4, 127.04 (2C), 127.01, 120.7, 120.6, 111.5, 69.8, 62.6, 42.6, 32.4, 26.6, 25.4, 24.2; (*Z* isomer)  $\delta$  = 155.8, 142.1, 137.3, 132.6, 128.5 (2C), 127.73, 127.66, 127.13 (2C), 127.10, 122.0, 120.8, 111.6, 69.9, 62.5, 41.5, 32.4, 28.1, 25.9, 24.1; IR (neat):  $\tilde{\nu}$  = 3334 (br), 3063, 3033, 2934, 2866, 1598, 1585, 1489, 1449, 1380, 1330, 1288, 1237, 1161, 1110, 1049, 1024, 914, 848, 813, 749, 695  $\text{cm}^{-1}$ ; HRMS (ES+) calcd for ( $\text{C}_{21}\text{H}_{24}\text{O}_2 + \text{Na}$ ): 331.1674; found: 331.1679; elemental analysis (%) calcd for  $\text{C}_{21}\text{H}_{24}\text{O}_2$ : C 81.78, H 7.84; found: C 81.45, H 7.85.

The geometry of the olefin in **8dd** was confirmed on the *Z* isomer by nOe experiments.

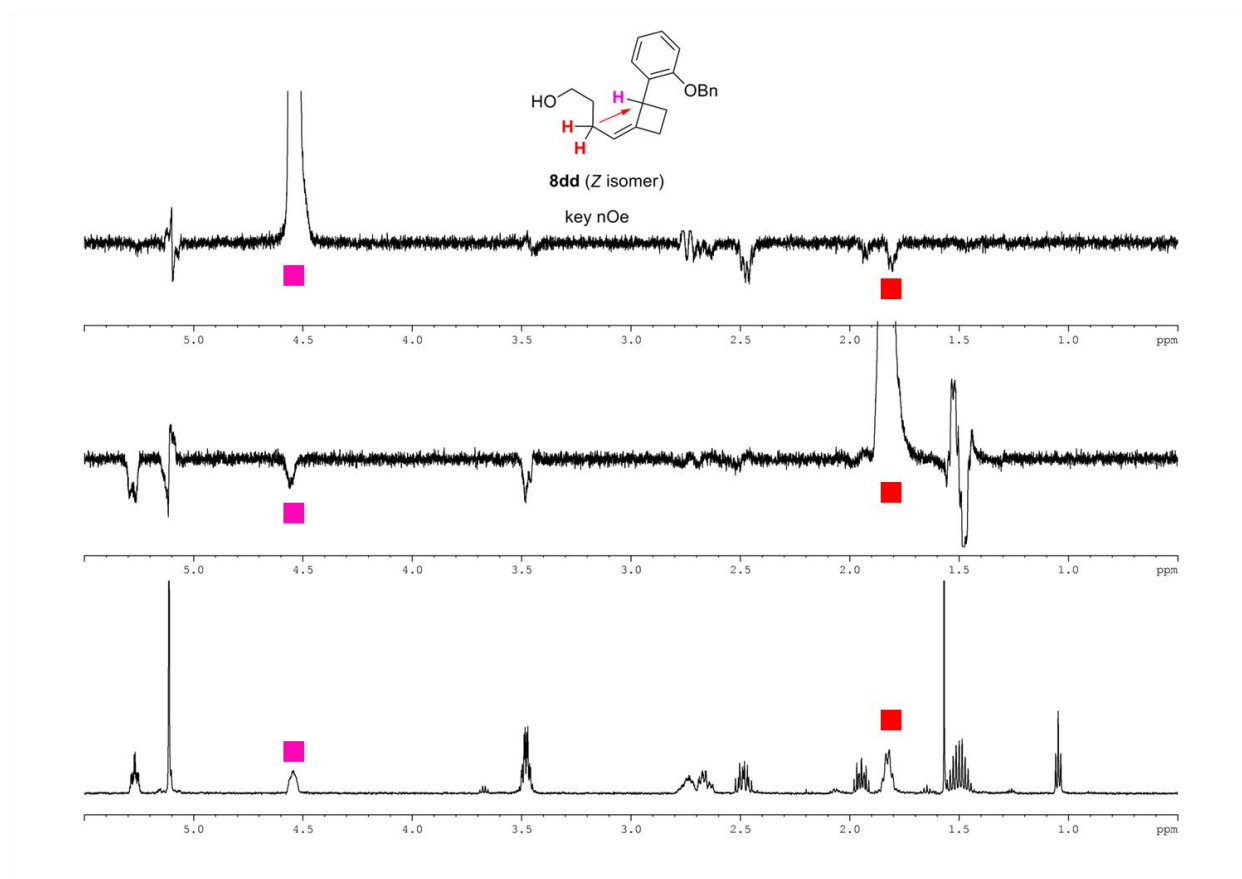

**Compound 8d (*E* isomer).** This compound was obtained from the *E* isomer of **8dd** (77 mg, 0.25 mmol) using the Swern procedure followed for the preparation of **6**. Colorless oil (36 mg, 47%). <sup>1</sup>H NMR (500 MHz, CDCl<sub>3</sub>): δ = 9.74 (s, 1H), 7.40 (d, *J* = 7.6 Hz, 2H), 7.39–7.35 (m, 2H), 7.34–7.27 (m, 2H), 7.15 (td, *J* = 7.8, 1.8 Hz, 1H), 6.92 (td, *J* = 7.5, 1.0 Hz, 1H), 6.89 (dd, *J* = 8.2, 0.8 Hz, 1H), 5.07 (tq, *J* = 7.3, 2.5 Hz, 1H), 5.05 (s, 2H), 4.53–4.45 (m, 1H), 2.69–2.61 (m, 2H), 2.43 (td, *J* = 7.1, 1.7 Hz, 2H), 2.38 (ddt, *J* = 10.9, 9.5, 7.1 Hz, 1H), 2.30–2.23 (m, 2H), 2.07–1.97 (m, 1H); <sup>13</sup>C NMR (125 MHz, CDCl<sub>3</sub>): δ = 202.4, 156.2, 144.3, 137.3, 131.9, 128.4 (2C), 127.6, 127.4, 127.1, 127.0 (2C), 120.6, 118.8, 111.5, 69.8, 43.6, 42.6, 26.6, 25.3, 20.8; IR (neat):  $\tilde{\nu}$  = 3063, 3033, 2941, 2917, 2856, 2825, 2721, 1721, 1598, 1585, 1489, 1450, 1382, 1330, 1289, 1237, 1161, 1110, 1050, 1024, 912, 852, 750, 696 cm<sup>-1</sup>; elemental analysis (%) calcd for C<sub>21</sub>H<sub>22</sub>O<sub>2</sub>: C 82.32, H 7.24; found: C 81.65, H 7.18.

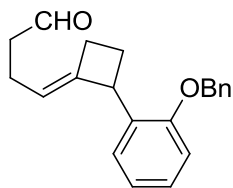

**Compound 8d (*Z* isomer).** This compound was obtained from the *Z* isomer of **8dd** (56 mg, 0.18 mmol) using the Swern procedure followed for the preparation of **6**. Colorless oil (31 mg, 56%). <sup>1</sup>H NMR (500 MHz, CDCl<sub>3</sub>): δ = 9.53 (t, *J* = 1.8 Hz, 1H), 7.44 (d, *J* = 7.3 Hz, 2H), 7.39 (t, *J* = 7.2 Hz, 2H), 7.35–7.29 (m, 2H), 7.17 (dt, *J* = 7.8 Hz, *J* = 1.6 Hz, 1H), 6.94 (t, *J* = 7.4 Hz, 1H), 6.91 (d, *J* = 8.2 Hz, 1H), 5.22 (tq, *J* = 7.4, 2.3 Hz, 1H), 5.07 (s, 2H), 4.58–4.46 (m, 1H), 2.77–2.672 (m, 1H), 2.667–2.57 (m, 1H), 2.46 (dtd, *J* = 11.5, 9.6, 6.8 Hz, 1H), 2.35–2.18 (m, 2H), 2.09–2.01 (m, 2H), 1.92 (t, *J* = 10.8, 6.0 Hz, 1H); <sup>13</sup>C NMR (125 MHz, CDCl<sub>3</sub>): δ = 202.6, 155.8, 143.5, 137.3, 132.3, 128.5 (2C), 127.8, 127.6, 127.21, 127.15 (2C), 120.8, 120.1, 111.7, 69.9, 43.5, 41.5, 28.1, 25.9, 20.8; IR (neat):  $\tilde{\nu}$  = 3064, 3032, 2942, 2918, 2856, 2721, 1722, 1598, 1585, 1489, 1450, 1407, 1381, 1319, 1288, 1236, 1178, 1161, 1108, 1050, 1024, 935, 915, 853, 751, 696 cm<sup>-1</sup>; MS (ES<sup>+</sup>): *m/z* (rel. intensity): 361 (100) [M + MeOH + Na], 329 (33) [M + Na]; HRMS (ES<sup>+</sup>) calcd for (C<sub>21</sub>H<sub>22</sub>O<sub>2</sub> + Na): 329.1517; found: 329.1531; HRMS (ES<sup>+</sup>) calcd for (C<sub>21</sub>H<sub>22</sub>O<sub>2</sub> + MeOH + Na): 361.1780; found: 361.1778.

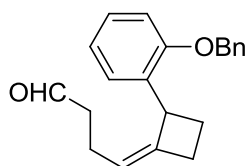

Preparation of compound **8e**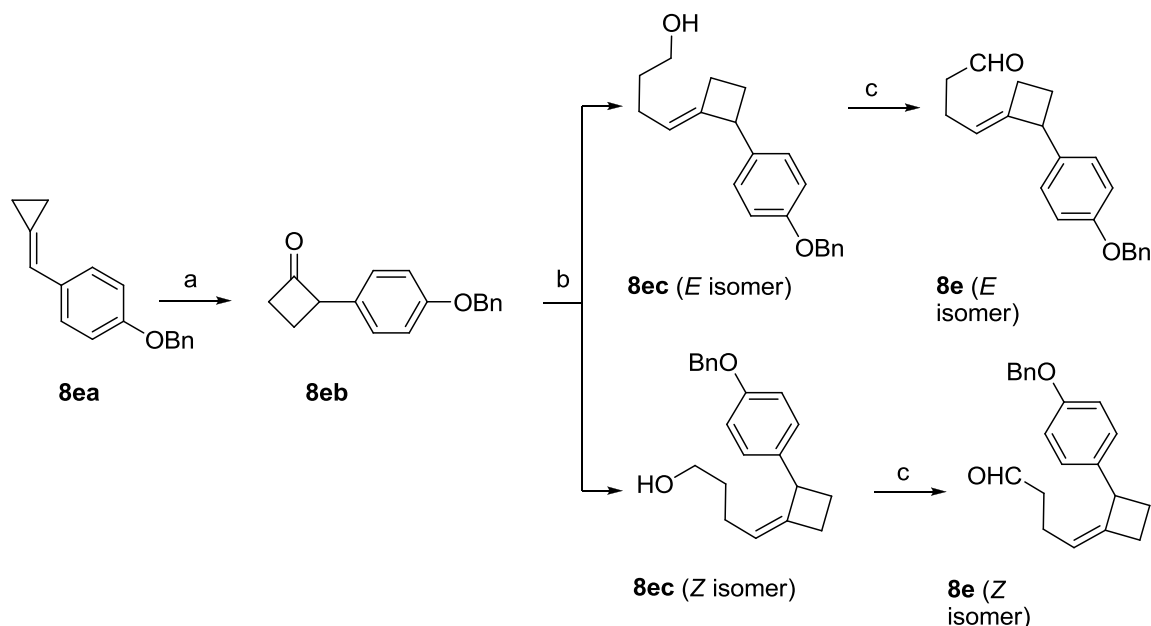

<sup>a</sup> mCPBA, CH<sub>2</sub>Cl<sub>2</sub>, r.t.; 65%. <sup>b</sup> 1) **16**, NaHMDS, THF, -78 °C to r.t.; 2) TBAF, THF, then separation; 43% over two steps. <sup>c</sup> (COCl)<sub>2</sub>, DMSO, Et<sub>3</sub>N, CH<sub>2</sub>Cl<sub>2</sub>, -78 °C; 71% (*E*); 74% (*Z*).

**Compound 8eb.** This compound was obtained from **8ea**<sup>5</sup> (2.75 g, 11.65 mmol) according to the procedure described for the preparation of **8db**. White solid (1.9 g, 65%). m.p.: 40–43 °C; <sup>1</sup>H NMR (500 MHz, CDCl<sub>3</sub>): δ = 7.41 (d, *J* = 7.1 Hz, 2H), 7.39–7.34 (m, 2H), 7.33–7.31 (m, 1H), 7.14 (d, *J* = 8.4 Hz, 2H), 6.90 (d, *J* = 9.0 Hz, 2H), 5.03 (s, 2H), 4.45 (ddt, *J* = 10.6, 8.2, 2.5 Hz, 1H), 3.19 (dddd, *J* = 18.8, 10.7, 8.3, 2.4 Hz, 1H), 3.00 (dddd, *J* = 17.5, 9.8, 4.9, 2.6 Hz, 1H), 2.50 (qd, *J* = 10.7, 4.9 Hz, 1H), 2.16 (ddt, *J* = 11.2, 9.8, 8.3 Hz, 1H); <sup>13</sup>C NMR (125 MHz, CDCl<sub>3</sub>): δ = 208.2, 157.7, 136.9, 128.9, 128.5 (2C), 128.0, (2C), 127.8, 127.3 (2C), 114.9 (2C), 69.9, 63.8, 44.6, 17.9; IR (neat):  $\tilde{\nu}$  = 3057, 3035, 2984, 2904, 2864, 1762, 1610, 1580, 1509, 1469, 1455, 1400, 1378, 1335, 1298, 1243, 1225, 1210, 1175, 1112, 1072, 1014, 993, 970, 929, 916, 906, 857, 821, 759, 743, 695 cm<sup>-1</sup>; HRMS (ES<sup>+</sup>) calcd for (C<sub>17</sub>H<sub>16</sub>O<sub>2</sub> + Na): 275.1048; found: 275.1049; elemental analysis (%) calcd for C<sub>17</sub>H<sub>16</sub>O<sub>2</sub>: C 80.93, H 6.39; found: C 80.76, H 6.42.

**Compound 8ec.** This compound was obtained from **8eb** (400 mg, 1.58 mmol) according to the procedures described for **8ab** and **8ac**. *E* (90 mg, 18%) and *Z* (72 mg, 14%) isomers of **8ec** could be separated by flash chromatography (petroleum ether/EtOAc, 4:1) and were both obtained as white solids. A fraction of mixture of *E* and *Z* isomers was also obtained (57 mg, 11%). *E* isomer, m.p.: 29–31 °C; *Z* isomer, m.p.: 31–34 °C; <sup>1</sup>H NMR (500 MHz, CDCl<sub>3</sub>): (*E* isomer) δ = 7.43 (d, *J* = 7.9 Hz, 2H), 7.38 (t, *J* = 7.6 Hz, 2H), 7.33–7.29 (m, 1H), 7.18 (d, *J* = 8.5 Hz, 2H), 6.92 (d, *J* = 8.6 Hz, 2H), 5.08–5.00 (m, 1H), 5.04 (s, 2H), 4.07–4.01 (m, 1H), 3.63 (t, *J* = 6.5 Hz, 2H), 2.72–2.60 (m, 2H), 2.42–2.31 (m, 1H), 2.08–1.95 (m, 3H), 1.60 (quint., *J* = 6.8 Hz, 2H), 1.50–1.34 (m, 1H(OH)); (*Z* isomer) δ = 7.42 (d, *J* = 7.4 Hz, 2H), 7.36 (t, *J* = 7.6 Hz, 2H), 7.33–7.29 (m, 1H), 7.19 (d, *J* = 9.1 Hz, 2H), 6.91 (d, *J* = 9.1 Hz, 2H), 5.16 (tq, *J* = 7.5, 2.3 Hz, 1H), 5.03 (s, 2H), 4.10–4.03 (m, 1H), 3.41 (t, *J* = 6.4 Hz, 2H), 2.76–2.60 (m, 2H), 2.46–2.37 (m, 1H), 1.95–1.86 (m, 1H), 1.74 (q, *J* = 7.3 Hz, 2H), 1.45 (dq, *J* = 13.7, 6.8 Hz, 1H), 1.37 (dq, *J* = 13.8, 6.9 Hz, 1H), 1.10–0.95 (m, 1H (OH)); <sup>13</sup>C NMR (125 MHz, CDCl<sub>3</sub>): (*E* isomer) δ = 157.2, 144.6,

<sup>5</sup> Fürstner, A.; Aïssa, C. *J. Am. Chem. Soc.* **2006**, *128*, 6306.

137.2, 136.1, 128.5 (2C), 128.3 (2C), 127.9, 127.4 (2C), 120.0, 114.6 (2C), 70.0, 48.0, 32.5, 26.7, 26.5, 24.1; (*Z* isomer)  $\delta$  = 157.1, 143.1, 137.2, 137.0, 128.5 (2C), 128.2 (2C), 127.9, 127.5 (2C), 121.9, 114.8 (2C), 70.0, 62.5, 47.1, 32.4, 28.3, 27.1, 23.8; IR (neat):  $\tilde{\nu}$  = 3340 (br), 3032, 2936, 1609, 1581, 1508, 1454, 1380, 1300, 1278, 1236, 1174, 1110, 1039, 1024, 914, 858, 825, 734, 695  $\text{cm}^{-1}$ ; HRMS (ES+) calcd for ( $\text{C}_{21}\text{H}_{24}\text{O}_2 + \text{Na}$ ): 331.1674; found: 331.1683; elemental analysis (%) calcd for  $\text{C}_{21}\text{H}_{24}\text{O}_2$ : C 81.78, H 7.84; found: C 80.64, H 7.68.

The geometry of the olefin in **8ec** was confirmed on the *Z* isomer by nOe experiments.

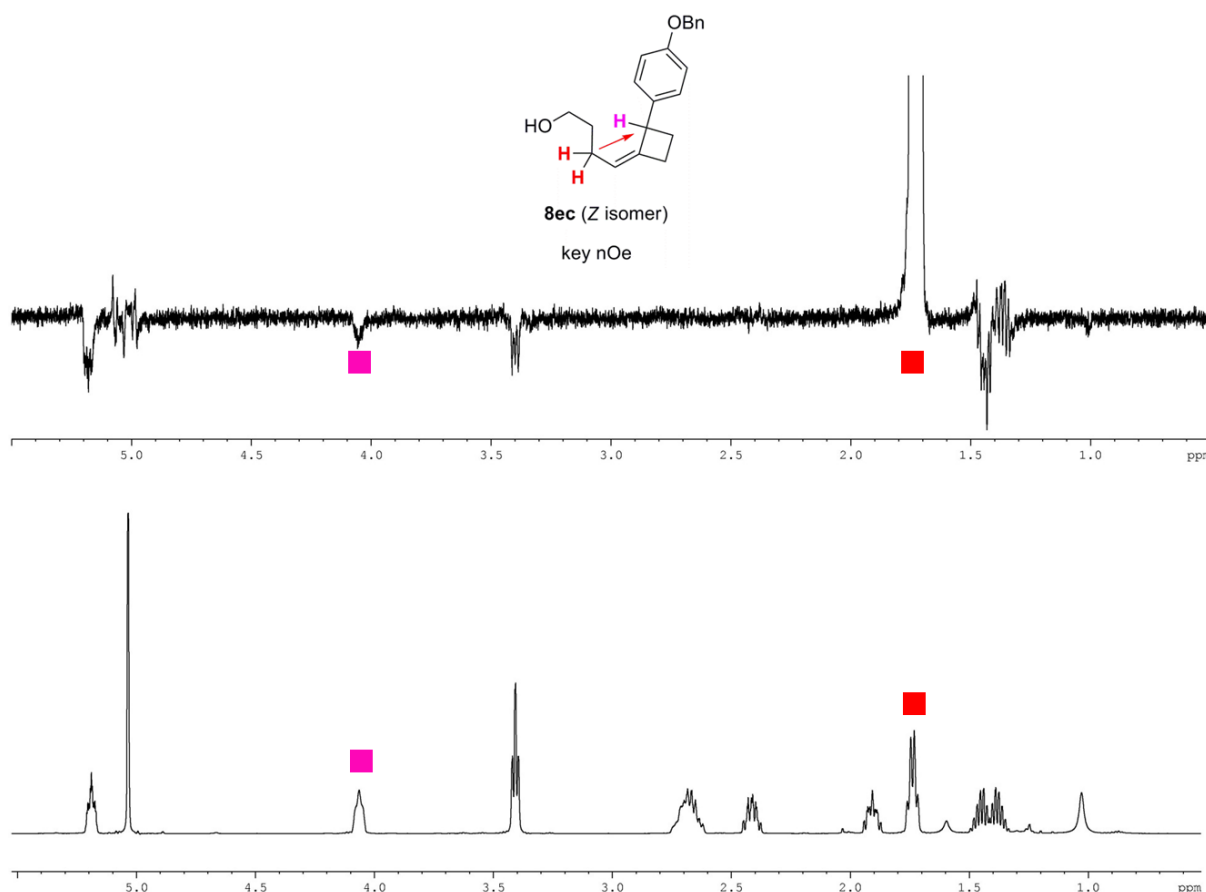

**Compound 8e (*E* isomer).** This compound was obtained from the *E* isomer of **8ec** (126 mg, 0.43 mmol) using the Swern procedure followed for the preparation of **6**. Colorless oil (94 mg, 71%).  $^1\text{H}$  NMR (500

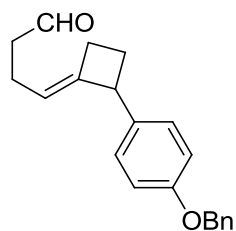

MHz,  $\text{CDCl}_3$ ):  $\delta$  = 9.74 (t,  $J$  = 1.8 Hz, 1H), 7.42 (d,  $J$  = 7.2 Hz, 2H), 7.39–7.34 (m, 2H), 7.33–7.31 (m, 1H), 7.14 (d,  $J$  = 8.8 Hz, 2H), 6.90 (d,  $J$  = 8.8 Hz, 2H), 5.03 (s, 2H), 4.99 (tq,  $J$  = 7.4, 2.5 Hz, 1H), 4.04–3.97 (m, 1H), 2.68–2.61 (m, 2H), 2.44 (td,  $J$  = 7.3, 1.7 Hz, 2H), 2.35 (ddt,  $J$  = 10.9, 9.2, 6.8 Hz, 1H), 2.31–2.25 (m, 2H), 2.10–1.92 (m, 1H);  $^{13}\text{C}$  NMR (125 MHz,  $\text{CDCl}_3$ ):  $\delta$  = 202.3, 157.2, 145.7, 137.2, 135.7, 128.5 (2C), 128.3 (2C), 127.8, 127.4 (2C), 118.3, 114.6 (2C), 70.0, 47.9, 43.6, 26.7, 26.4, 20.7; IR (neat):

$\tilde{\nu}$  = 3043, 2942, 2721, 1721, 1609, 1581, 1508, 1454, 1382, 1301, 1282, 1236, 1174, 1110, 1016, 913, 857, 826, 735, 696  $\text{cm}^{-1}$ ; MS (ES+):  $m/z$  (rel. intensity): 361 (100) [ $\text{M} + \text{MeOH} + \text{Na}$ ], 329 (57) [ $\text{M} + \text{Na}$ ]; HRMS (ES+) calcd for ( $\text{C}_{21}\text{H}_{22}\text{O}_2 + \text{Na}$ ): 329.1517; found: 329.1530.

**Compound 8e (Z isomer).** This compound was obtained from the Z isomer of **8ec** (88 mg, 0.29 mmol) using the Swern procedure followed for the preparation of **6**. Colorless oil (65 mg, 74%).  $^1\text{H}$  NMR (500 MHz,  $\text{CDCl}_3$ ):  $\delta$  = 9.52–9.50 (m, 1H), 7.42 (d,  $J$  = 7.5 Hz, 2H), 7.36 (t,  $J$  = 7.3 Hz, 2H), 7.33–7.29 (m, 1H), 7.17 (d,  $J$  = 9.1 Hz, 2H), 6.90 (d,  $J$  = 8.7 Hz, 2H), 5.16 (tq,  $J$  = 7.5, 2.3 Hz, 1H), 5.03 (s, 2H), 4.11–4.02 (m, 1H), 2.75–2.59 (m, 2H), 2.41 (dtd,  $J$  = 11.1, 9.4, 6.3 Hz, 1H), 2.28–2.13 (m, 2H), 2.05–1.92 (m, 2H), 1.96–1.86 (m, 1H);  $^{13}\text{C}$  NMR (125 MHz,  $\text{CDCl}_3$ ):  $\delta$  = 202.4, 157.2, 144.4, 137.1, 136.6, 128.5 (2C), 128.2 (2C), 127.9, 127.4 (2C), 120.0, 114.8 (2C), 70.0, 47.1, 43.4, 28.2, 27.1, 20.5; IR (neat):  $\tilde{\nu}$  = 3032, 2945, 2721, 1721, 1609, 1580, 1508, 1454, 1382, 1299, 1272, 1233, 1174, 1110, 1023, 915, 858, 826, 734, 695  $\text{cm}^{-1}$ ; MS (ES<sup>+</sup>):  $m/z$  (rel. intensity): 361 (100) [ $\text{M} + \text{MeOH} + \text{Na}$ ], 329 (40) [ $\text{M} + \text{Na}$ ]; HRMS (ES<sup>+</sup>) calcd for ( $\text{C}_{21}\text{H}_{22}\text{O}_2 + \text{Na}$ ): 329.1517; found: 329.1503.

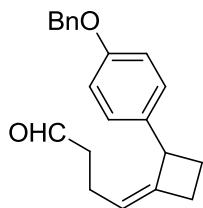

### Preparation of compound 8f

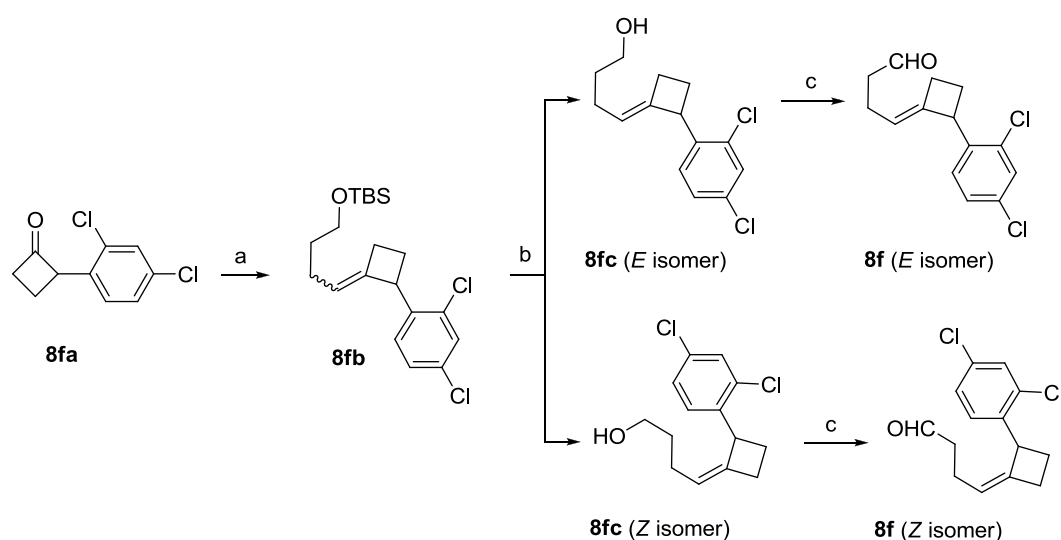

<sup>a</sup> **16**, LiHMDS, toluene,  $-78^\circ\text{C}$  to r.t.; 75%. <sup>b</sup> TBAF, THF; then separation: *E* isomer (48%) + *Z* isomer (34%). <sup>c</sup> ( $\text{COCl}_2$ ), DMSO,  $\text{Et}_3\text{N}$ ,  $\text{CH}_2\text{Cl}_2$ ,  $-78^\circ\text{C}$ ; *E* isomer (71%), *Z* isomer (79%).

**Compound 8fb.** This compound was prepared from **8fa**<sup>6</sup> (271 mg, 1.26 mmol) according to the procedure described for the preparation of **8cb**. Purification by flash chromatography (petroleum ether/ $\text{EtOAc}$ , 200/1

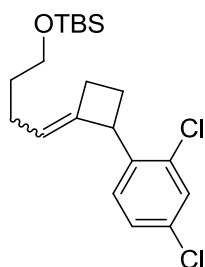

$\rightarrow 150/1 \rightarrow 50/1 \rightarrow 15/1$ ) gave **8fb** as an equimolar mixture of *E* and *Z* isomers (360 mg, 75%). Colorless oil.  $^1\text{H}$  NMR (500 MHz,  $\text{CDCl}_3$ ):<sup>3</sup>  $\delta$  = 7.39 (d,  $J$  = 8.4 Hz, 0.55H), 7.33 (d,  $J$  = 2.4 Hz, 1H), [7.31 (d,  $J$  = 8.4 Hz, 0.45H)], 7.19–7.15 (m, 1H), [5.32 (tq,  $J$  = 7.4, 2.3 Hz, 0.45H)], 5.11 (tq,  $J$  = 7.4, 2.5 Hz, 0.55H), 4.45–4.36 (m, 1H), 3.60 (t,  $J$  = 6.6 Hz, 1.1H), [3.47 (t,  $J$  = 6.6 Hz, 0.9H)], 2.76–2.59 (m, 2H), [2.57–2.49 (m, 0.45H)], 2.51–2.42 (m, 0.55H), 2.06–1.95 (m, 1.1H), 1.91–1.81 (m, 0.55H), [1.78–1.65 (m, 1.35H)], 1.56 (quint.,  $J$  = 6.9 Hz, 1.1H), [1.44 (quint.,  $J$  = 7.1 Hz, 0.9H)], 0.88 (s, 5H), [0.82 (s, 4H)], 0.03 (s, 3.3H), [-0.03 (s, 1.4H)], [-0.04 (s, 1.4H)];  $^{13}\text{C}$  NMR (125 MHz,  $\text{CDCl}_3$ ):<sup>3</sup>  $\delta$  = 140.7, [140.0], [139.9], 139.3, 134.4, [134.0], 132.1, [129.04], 129.01, [128.9], 128.8, [127.0], 126.9, [123.8], 122.6, [62.7], 62.6, 44.9, [43.9], 32.7, [32.5], [27.8], 26.4, [26.2], 26.0 (3C), [25.9 (3C)], [24.6], 24.2, 18.33, [18.27], -5.3 (2C), [-5.4 (2C)]; IR (neat):  $\tilde{\nu}$  = 2952, 2928, 2856, 1588, 1558, 1470, 1384, 1361, 1254, 1098, 1049, 1006, 964, 939, 865, 833, 810, 773  $\text{cm}^{-1}$ ; MS (ES<sup>+</sup>):  $m/z$  (rel. intensity): 409 (72), 407 (100) [ $\text{M} + \text{Na}$ ], 387 (36), 385 (51) [ $\text{M} + \text{H}$ ]; HRMS (ES<sup>+</sup>) calcd for ( $\text{C}_{20}\text{H}_{30}^{35}\text{Cl}_2\text{SiO} + \text{Na}$ ): 407.1341; found: 407.1326.

<sup>6</sup> Schweinitz, A.; Chtchemelimine, A.; Orellana, A. *Org. Lett.* **2011**, *13*, 232.

**Compound 8fc.** This compound was obtained from **8fb** (360 mg, 0.94 mmol) according the procedure described **8ac**. Purification by flash chromatography (petroleum ether/EtOAc, 10/1  $\rightarrow$  5/1) enabled partial separation of *E* (123 mg, 48%) and *Z* (87 mg, 34%) isomers of **8fc**, both obtained as colorless oils.  $^1\text{H}$  NMR (500 MHz,  $\text{CDCl}_3$ ): (*E* isomer)  $\delta$  = 7.37 (d,  $J$  = 8.4 Hz, 1H), 7.34 (d,  $J$  = 8.2 Hz, 1H), 7.18 (dd,  $J$  = 8.3, 2.2 Hz, 1H), 5.12 (tq,  $J$  = 7.4, 2.5 Hz, 1H), 4.46–4.39 (m, 1H), 3.65 (q,  $J$  = 6.0 Hz, 2H), 2.71–2.62 (m, 2H), 2.51–2.43 (m, 1H), 2.09–2.01 (m, 2H), 1.89 (dtd,  $J$  = 11.1, 8.8, 7.5 Hz, 1H), 1.63 (quint.,  $J$  = 7.0 Hz, 2H), 1.21 (t,  $J$  = 5.6 Hz, 1H(OH)); (*Z* isomer)  $\delta$  = 7.35 (d,  $J$  = 2.4 Hz, 1H), 7.31 (d,  $J$  = 8.4 Hz, 1H), 7.18 (dd,  $J$  = 8.4, 2.3 Hz, 1H), 5.32 (tq,  $J$  = 7.4, 2.3 Hz, 1H), 4.46–4.37 (m, 1H), 3.52 (q,  $J$  = 6.1 Hz, 2H), 2.77–2.61 (m, 2H), 2.54 (dtd,  $J$  = 11.3, 9.3, 7.1 Hz, 1H), 1.81–1.72 (m, 3H), 1.57–1.45 (m, 2H), 1.10 (t,  $J$  = 5.3 Hz, 1H(OH));  $^{13}\text{C}$  NMR (125 MHz,  $\text{CDCl}_3$ ): (*E* isomer)  $\delta$  = 141.3, 139.7, 134.3, 132.1, 129.0, 128.7, 122.1, 62.5, 44.8, 32.4, 26.4, 25.7, 24.2; (*Z* isomer)  $\delta$  = 140.0, 134.1, 132.2, 129.1, 128.9, 127.0, 123.4, 62.5, 43.9, 32.3, 27.8, 26.1, 24.4; IR (neat):  $\tilde{\nu}$  = 3318 (br), 2936, 1586, 1557, 1468, 1426, 1381, 1333, 1100, 1048, 916, 865, 841, 819, 809  $\text{cm}^{-1}$ ; MS (ES $^+$ ):  $m/z$  (rel. intensity): 295 (67), 293 (100) [ $\text{M} + \text{Na}$ ]; HRMS (ES $^+$ ) calcd for ( $\text{C}_{14}\text{H}_{16}^{35}\text{Cl}_2\text{O} + \text{Na}$ ): 293.0476; found: 293.0463.

The geometry of the olefin in **8fc** was confirmed on the *E* isomer by nOe experiments.

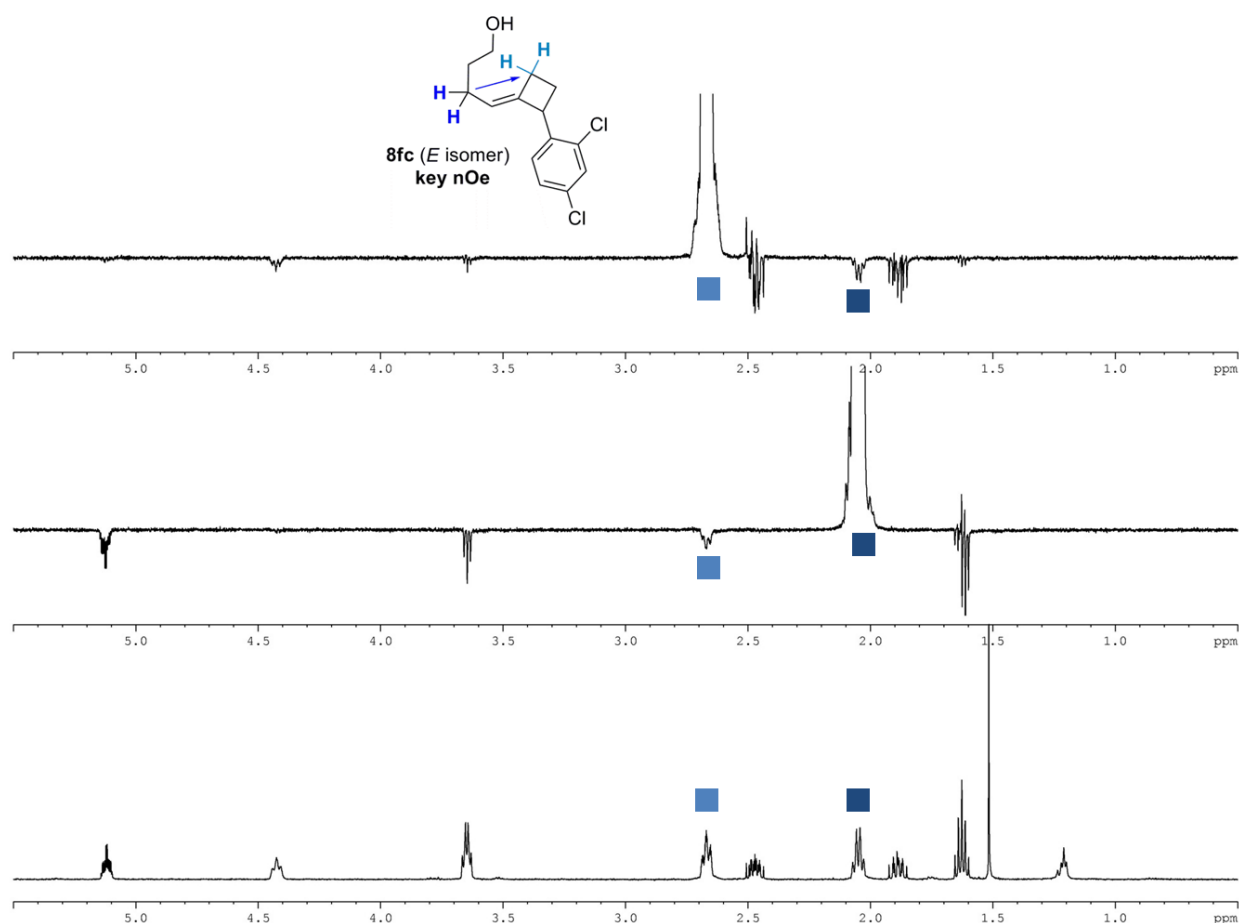



**Compound 8f (*E* isomer).** This compound was obtained from the *E* isomer of **8fc** (123 mg, 0.46 mmol) using the Swern procedure followed for the preparation of **6**. Colorless oil (88 mg, 71%). <sup>1</sup>H NMR (500 MHz, CDCl<sub>3</sub>): δ = 9.76 (t, *J* = 1.6 Hz, 1H), 7.34 (d, *J* = 2.3 Hz, 1H), 7.33 (d, *J* = 8.4 Hz, 1H), 7.18 (dd, *J* = 8.4, 2.2 Hz, 1H), 5.08 (tq, *J* = 7.2, 2.6 Hz, 1H), 4.45–4.38 (m, 1H), 2.73–2.64 (m, 1H), 2.52–2.44 (m, 3H), 2.33–2.24 (m, 2H), 1.90 (dtd, *J* = 11.1, 8.7, 7.5 Hz, 1H); <sup>13</sup>C NMR (125 MHz, CDCl<sub>3</sub>): δ = 202.0, 142.5, 139.4, 134.3, 132.2, 129.0, 128.7, 127.0, 120.4, 44.8, 43.6, 26.5, 25.6, 20.8; IR (neat):  $\tilde{\nu}$  = 2949, 2822, 2720, 1723, 1587, 1557, 1468, 1443, 1407, 1382, 1194, 1141, 1100, 1048, 865, 803 cm<sup>-1</sup>; MS (ES<sup>+</sup>): *m/z* (rel. intensity): 325 (66), 323 (100) [*M* + MeOH + Na], 293 (5), 291 (8) [*M* + Na]; HRMS (ES<sup>+</sup>) calcd for (C<sub>14</sub>H<sub>14</sub><sup>35</sup>Cl<sub>2</sub>O + Na): 291.0319; found: 291.0313.

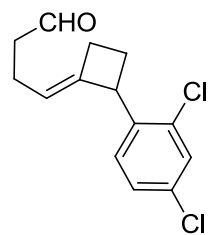

**Compound 8f (*Z* isomer).** This compound was obtained from the *Z* isomer of **8fc** (85 mg, 0.31 mmol) using the Swern procedure followed for the preparation of **6**. Colorless oil (66 mg, 79%). <sup>1</sup>H NMR (500 MHz, CDCl<sub>3</sub>): δ = 9.63 (t, *J* = 1.7 Hz, 1H), 7.36 (d, *J* = 2.2 Hz, 1H), 7.30 (d, *J* = 8.3 Hz, 1H), 7.19 (dd, *J* = 8.3, 2.2 Hz, 1H), 5.28 (tq, *J* = 7.4, 2.3 Hz, 1H), 4.46–4.40 (m, 1H), 2.77–2.60 (m, 2H), 2.54 (dtd, *J* = 11.2, 9.3, 7.1 Hz, 1H), 2.38–2.31 (m, 2H), 2.07–1.95 (m, 2H), 1.78 (dtd, *J* = 11.3, 10.1, 6.0 Hz, 1H); <sup>13</sup>C NMR (125 MHz, CDCl<sub>3</sub>): δ = 201.9, 141.3, 139.6, 134.0, 132.3, 129.2, 128.8, 127.1, 121.6, 43.8, 43.3, 27.8, 26.1, 20.1; IR (neat):  $\tilde{\nu}$  = 2949, 2824, 2720, 1724, 1586, 1557, 1468, 1440, 1407, 1382, 1194, 1143, 1100, 1048, 865, 819, 803 cm<sup>-1</sup>; MS (ES<sup>+</sup>): *m/z* (rel. intensity): 325 (61), 323 (100) [*M* + MeOH + Na], 293 (5), 291 (8) [*M* + Na]; HRMS (ES<sup>+</sup>) calcd for (C<sub>14</sub>H<sub>14</sub><sup>35</sup>Cl<sub>2</sub>O + MeOH + Na): 323.0582; found: 323.0569.

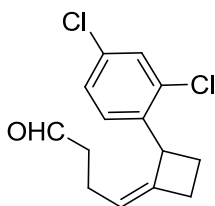

### Preparation of compound 8g

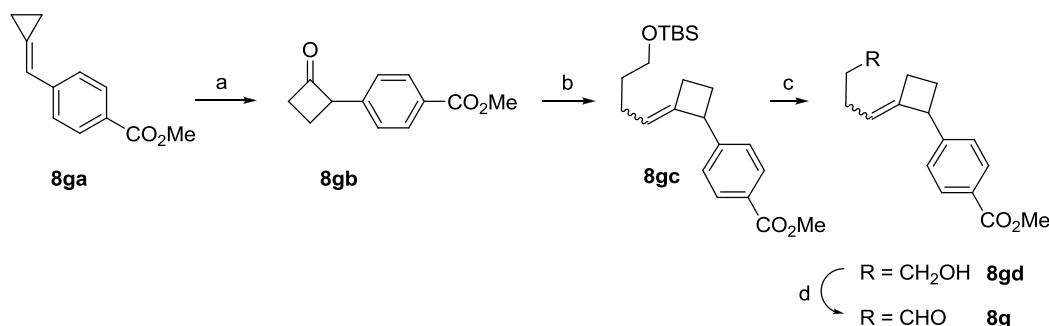

<sup>a</sup> mCPBA, CH<sub>2</sub>Cl<sub>2</sub>, r.t.; 66%. <sup>b</sup> **16**, LiHMDS, toluene, –78 °C to r.t.; 37%. <sup>c</sup> TBAF, THF; 78%. <sup>d</sup> (COCl)<sub>2</sub>, DMSO, Et<sub>3</sub>N, CH<sub>2</sub>Cl<sub>2</sub>, –78 °C; 69%.

**Compound 8gb.** This compound was obtained from **8ga**<sup>5</sup> (0.90 g, 4.78 mmol) according to the procedure described for the preparation of **8db**. Pale yellow solid (0.65 g, 66%). m.p.: 78–80 °C; <sup>1</sup>H NMR (500 MHz, CDCl<sub>3</sub>): δ = 7.98 (d, *J* = 8.4 Hz, 2H), 7.31 (d, *J* = 8.4 Hz, 2H), 4.58 (ddt, *J* = 10.5, 8.2, 2.3 Hz, 1H), 3.88 (s, 3H), 3.30–3.21 (m, 1H), 3.05 (dddd, *J* = 17.3, 9.7, 4.8, 2.4 Hz, 1H), 2.56 (qd, *J* = 10.8, 4.9 Hz, 1H), 2.26 (ddt, *J* = 11.0, 9.8, 8.3 Hz, 1H); <sup>13</sup>C NMR (125 MHz, CDCl<sub>3</sub>): δ = 206.6, 166.8, 141.4, 129.9 (2C), 128.7, 126.8 (2C), 64.2, 52.1, 44.9, 17.3; IR (neat):  $\tilde{\nu}$  = 3000, 2954, 1780, 1717, 1610, 1572, 1509, 1435, 1010, 1313, 1275, 1180, 1108, 1069, 1019, 962, 851, 826, 769, 748, 724, 699 cm<sup>-1</sup>; MS (CI): *m/z* (rel. intensity): 222 (100) [*M* + NH<sub>4</sub>], 205 (10) [*M* + H], 162 (19), 131 (14); elemental analysis (%) calcd for C<sub>12</sub>H<sub>12</sub>O<sub>3</sub>: C 70.57, H 5.92; found: C 69.29, H 6.00.

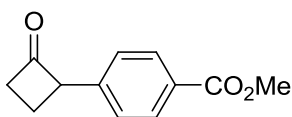

**Compound 8gc.** This compound was prepared from **8gb** (350 mg, 1.71 mmol) according to the procedure described for the preparation of **8cb**. Purification by flash chromatography (petroleum ether/Et<sub>2</sub>O, 100/1 → 50/1) gave **8gb** as an equimolar mixture of *E* and *Z* isomers (242 mg, 37%). Colorless oil. <sup>1</sup>H NMR (500 MHz, CDCl<sub>3</sub>): <sup>3</sup>δ = 7.96–7.93 (m, 2H), 7.33–7.29 (m, 2H), [5.22 (tq, *J* = 7.4, 2.4 Hz, 0.5H)], 5.01 (tq, *J* = 7.6, 2.4 Hz, 0.5H), 4.17–4.09 (m, 1H), 3.89 (s, 3H), 3.57 (t, *J* = 6.5 Hz, 1H), [3.43–3.32 (m, 1H)], 2.78–2.64 (m, 2H), [2.46 (dtd, *J* = 11.3, 9.4, 6.5 Hz, 0.5H)], 2.39 (ddt, *J* = 10.9, 9.3, 7.0 Hz, 0.5H), 2.08–2.00 (m, 0.5H), 1.97 (q, *J* = 7.3 Hz, 1H), [1.91 (ddt, *J* = 11.2, 10.1, 6.6 Hz, 0.5H)], [1.72–1.55 (m, 1H)], 1.55–1.49 (m, 1H), [1.40–1.30 (m, 1H)], 0.87 (s, 4.5H), [0.80 (s, 4.5H)], 0.02 (s, 3H), [-0.05 (s, 1.5H)], [-0.06 (s, 1.5H)]; <sup>13</sup>C NMR (125 MHz, CDCl<sub>3</sub>): <sup>3</sup>δ = 167.13, [167.10], [150.0], 149.2, 142.6, [140.8], [129.8 (2C)], 129.7 (2C), 127.9, [127.8], 127.4 (2C), [127.3 (2C)], [123.1], 121.4, 62.7, [62.6], 51.95, [51.92], 48.5, [47.6], 32.7, [32.4], [28.3], [27.0], 26.8, 26.1, 26.0 (3C), [25.9 (3C)], 24.2, [24.0], 18.31, [18.25], -5.3 (2C), [-5.4 (2C)]; IR (neat):  $\tilde{\nu}$  = 2951, 2929, 2856, 1724, 1610, 1472, 1463, 1435, 1415, 1388, 1361, 1310, 1277, 1255, 1192, 1177, 1101, 1020, 1006, 965, 940, 835, 774, 705 cm<sup>-1</sup>; MS (ES<sup>+</sup>): *m/z* (rel. intensity): 397 (100) [M + Na]; HRMS (ES<sup>+</sup>) calcd for (C<sub>22</sub>H<sub>34</sub>O<sub>3</sub> + Na): 397.2175; found: 397.2186.

**Compound 8gd.** This compound was obtained from **8gc** (242 mg, 0.65 mmol) according the procedure described **8ac**. After purification by flash chromatography (petroleum ether/Et<sub>2</sub>O, 3/1 → 2/1 → 1/1), a first batch of **8gd** (131 mg, 78%) was obtained as colourless oil (*E/Z* = 1:1.3). However, further attempts to separate the isomers led to partial decomposition and contamination by an unidentified compound. The data given below was obtained for a mixture of *E/Z* = 1:4, and this material was also used in the next step. <sup>1</sup>H NMR (500 MHz, CDCl<sub>3</sub>): (*Z* isomer) δ = 7.94 (d, *J* = 8.2 Hz, 2H), 7.33 (d, *J* = 8.4 Hz, 2H), 5.23 (tq, *J* = 7.6, 2.3 Hz, 1H), 4.18–4.13 (m, 1H), 3.87 (s, 3H), 3.40 (t, *J* = 6.1 Hz, 2H), 2.79–2.64 (m, 2H), 2.50–2.42 (m, 1H), 1.92 (ddt, *J* = 11.2, 10.2, 6.6 Hz, 1H), 1.74–1.63 (m, 2H), 1.47–1.32 (m, 2H); characteristic signals of *E* isomer: δ = 7.30 (d, *J* = 8.6 Hz, 2H), 5.02 (tq, *J* = 7.4, 2.5 Hz, 1H), 4.15–4.09 (m, 1H), 3.61 (t, *J* = 6.1 Hz, 2H), 2.11–2.03 (m, 1H), 2.01 (q, *J* = 7.2 Hz, 2H), 1.62–1.53 (m, 2H); <sup>13</sup>C NMR (125 MHz, CDCl<sub>3</sub>): (only *Z* isomer described for clarity) δ = 167.0, 149.9, 141.5, 129.8 (2C), 127.9, 127.2 (2C), 122.6, 62.4, 51.9, 47.5, 32.2, 28.3, 26.8, 24.0; IR (neat):  $\tilde{\nu}$  = 3357 (br), 2947, 1719, 1608, 1571, 1434, 1415, 1309, 1276, 1191, 1177, 1104, 1048, 1019, 965, 918, 851, 826, 771 and 705 cm<sup>-1</sup>; MS (CI): *m/z* (rel. intensity): 278 (100) [M + NH<sub>4</sub>], 261 (43) [M + H], 229 (39), 85 (42).

**Compound 8g.** This compound was obtained from a *E/Z* = 1:4 mixture of **8gd** (27 mg, 0.10 mmol) using the Swern procedure followed for the preparation of **6**. Colorless oil (20 mg, 69% (*E/Z* = 1:4)). This reaction was repeated on similar scale with similar results using several batches of **8gd** (*E/Z* = 1:2 to 1:5). <sup>1</sup>H NMR (500 MHz, CDCl<sub>3</sub>): (*Z* isomer) δ = 9.53–9.51 (m, 1H), 7.95 (d, *J* = 8.2 Hz, 2H), 7.33 (d, *J* = 8.2 Hz, 2H), 5.19 (tq, *J* = 7.4, 2.3 Hz, 1H), 4.19–4.13 (m, 1H), 3.88 (s, 3H), 2.79–2.64 (m, 2H), 2.51–2.42 (m, 1H), 2.29–2.15 (m, 2H), 2.00–1.85 (m, 3H); characteristic signals of *E* isomer: δ = 9.74–9.72 (m, 1H), 7.29 (d, *J* = 8.6 Hz, 2H), 4.98 (tq, *J* = 7.3, 2.5 Hz, 1H), 4.13–4.08 (m, 1H), 2.11–2.01 (m, 1H); <sup>13</sup>C NMR (125 MHz, CDCl<sub>3</sub>): δ = 202.1, [202.0], 167.04, [166.98], [149.5], 148.6, 144.3, [142.8], [129.9 (2C)], 129.7 (2C), [128.1], 127.3 (2C), [127.2 (2C)], 125.3, [120.9], 119.3, 52.0, 48.4, [47.6], 43.5, [43.2], [28.3], [26.83], 26.79, 25.9, 20.6, [20.5]; IR (neat):  $\tilde{\nu}$  = 2950, 2846, 2720, 1718, 1609, 1572, 1435, 1415, 1310, 1277, 1177, 1104, 1019, 965, 852, 825, 773, 705 cm<sup>-1</sup>; MS (ES<sup>+</sup>): *m/z* (rel. intensity): 281 (100) [M + Na]; HRMS (ES<sup>+</sup>) calcd for (C<sub>16</sub>H<sub>18</sub>O<sub>3</sub> + Na): 281.1154; found: 281.1154.

Preparation of compound ( $\pm$ )-**11**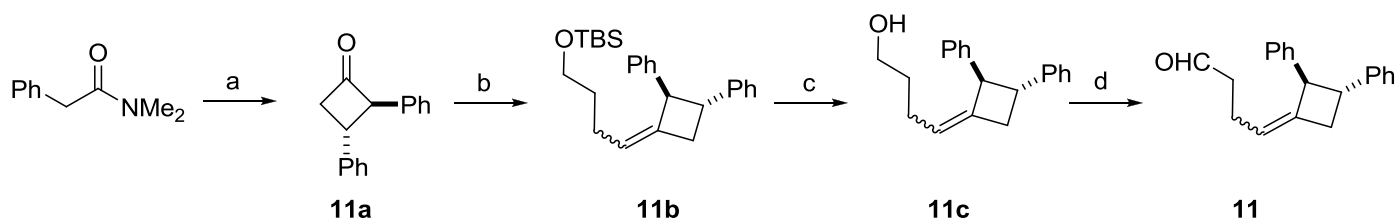

<sup>a</sup> *N,N*-Dimethyl-2-phenyl-acetamide, *sym*-collidine, styrene,  $\text{Ti}_2\text{O}$ ,  $\text{CHCl}_3$ , reflux, 52%. <sup>b</sup> **16**, LiHMDS, toluene,  $-78^\circ\text{C}$  to r.t.; 49%. <sup>c</sup> TBAF, THF; 53%. <sup>d</sup>  $(\text{COCl})_2$ , DMSO,  $\text{Et}_3\text{N}$ ,  $\text{CH}_2\text{Cl}_2$ ,  $-78^\circ\text{C}$ ; 79–84%.

**Compound 11a.** This compound was prepared by slightly modifying the original procedure.<sup>7</sup> To a refluxing mixture of *N,N*-Dimethyl-2-phenyl-acetamide<sup>8</sup> (0.485 g, 2.98 mmol), *sym*-collidine (0.47 mL, 3.55 mmol) and styrene (3.42 mL, 29.8 mmol) in  $\text{CHCl}_3$  (10 mL) under argon was added  $\text{Ti}_2\text{O}$  (0.59 mL, 3.55 mmol) in  $\text{CHCl}_3$  (20 mL) dropwise over 16 hours (*via* addition funnel). The reaction mixture was cooled to room temperature diluted with  $\text{CH}_2\text{Cl}_2$  (50 mL) and water (50 mL). The biphasic mixture was stirred for 30 minutes, separated and the aqueous layer extracted with  $\text{CH}_2\text{Cl}_2$  ( $2 \times 50$  mL). The combined organic layers were dried

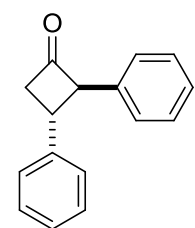

( $\text{Na}_2\text{SO}_4$ ) and the solvent removed under reduced pressure. Purification by flash column chromatography (petroleum ether/ $\text{Et}_2\text{O}$ , 40:1  $\rightarrow$  10:1) gave racemic **11a** as a colourless oil (0.34 g, 52%).  $^1\text{H}$  NMR (500 MHz,  $\text{CDCl}_3$ ):  $\delta$  = 7.37–7.34 (m, 4H), 7.33 (d,  $J$  = 7.5 Hz, 2H), 7.29–7.25 (m, 4H), 4.58 (d,  $J$  = 8.8 Hz, 1H), 3.82 (q,  $J$  = 8.9 Hz, 1H), 3.44 (ddd,  $J$  = 17.2, 8.8, 1.8 Hz, 1H), 3.37 (ddd,  $J$  = 17.2, 9.1, 2.0 Hz, 1H);  $^{13}\text{C}$  NMR (125 MHz,  $\text{CDCl}_3$ ):  $\delta$  = 205.1, 142.4, 135.6, 128.8 (2C), 128.7 (2C), 127.3, 127.0 (2C), 126.9, 126.6 (2C), 71.5, 51.4, 36.8; IR (neat):  $\tilde{\nu}$  = 3028, 2923, 1779, 1670, 1601, 1495, 1448, 1397, 1207, 1170, 1114, 1074, 1030, 953, 747, 697  $\text{cm}^{-1}$ ; MS (CI):  $m/z$  (rel. intensity): 240 (100) [ $\text{M} + \text{NH}_4$ ], 223 (9) [ $\text{M} + \text{H}$ ].

The relative configuration of the stereogenic centres in ( $\pm$ )-**11a** was established unambiguously after its Baeyer-Villiger oxidation into  $\beta,\gamma$ -Diphenylbutyrolactone ( $\pm$ )-**18** and by comparison to literature  $^1\text{H}$  NMR data<sup>9</sup> { $^1\text{H}$ -NMR (500 MHz,  $\text{CDCl}_3$ ):  $\delta$  = 7.35–7.26 (m, 6H), 7.19–7.13 (m, 4H), 5.41 (d,  $J$  = 8.5 Hz, 1H), 3.61–3.54 (m, 1H), 3.05 (dd,  $J$  = 17.5, 8.5 Hz, 1H) and 2.91 (dd,  $J$  = 17.5, 10.7 Hz, 1H)}.

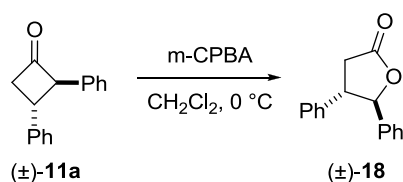

<sup>7</sup> Falmagne, V. J.-B.; Escudero, J.; Taleb-Sahraoui, S.; Ghosez, L. *Angew. Chem.* **1981**, 93, 926.

<sup>8</sup> Prepared according to Pintori, D.G.; Greaney, M.F. *Org. Lett.* **2011**, 13, 5713.

<sup>9</sup> Pippel, D.J.; Curtis, M.D.; Du, H.; Beak, P. *J. Org. Chem.* **1998**, 63, 2. For  $^1\text{H}$  NMR data of the other diastereomer, see: Katritzky, A. R.; Feng, D.; Lang, H. *J. Org. Chem.* **1997**, 62, 706.

**Compound 11b.** This compound was prepared from **11a** (0.27 g, 1.21 mmol) according to the procedure described for the preparation of **8cb**. Purification by flash chromatography (petroleum ether/Et<sub>2</sub>O, 100:1 → 50:1) gave (±)-**11b** as an inseparable mixture of *E* and *Z* isomers (232 mg, 49%, *E/Z* = 45:55). Colorless oil. <sup>1</sup>H NMR (500 MHz, CDCl<sub>3</sub>):<sup>3</sup> δ = 7.32–7.25 (m, 6H), 7.24–7.15 (m, 4H), [5.34 (tq, *J* = 7.5, 2.0 Hz, 0.55H)], 5.14 (tq, *J* = 7.4, 2.5 Hz, 0.45H), 4.13–4.03 (m, 1H), 3.62 (t, *J* = 6.6 Hz, 0.9H), 3.55 (q, *J* = 8.7 Hz, 0.45H), [3.45 (q, *J* = 8.4 Hz, 0.55H)], [3.43–3.33 (m, 1.1H)], 3.16–3.06 (m, 1H), 2.89–2.77 (m, 1H), 2.12–1.98 (m, 0.9H), [1.73–1.59 (m, 1.1H)], 1.58 (quint., *J* = 7.0 Hz, 0.9H), [1.42–1.34 (m, 1.1H)], 0.89 (s, 4H), [0.82 (s, 5H)], 0.04 (s, 2.7H), [-0.04 (s, 1.65H)], [-0.05 (s, 1.65H)]; <sup>13</sup>C NMR (125 MHz, CDCl<sub>3</sub>):<sup>3</sup> δ = [144.9], 144.4, [142.9], 142.1, 139.5, [137.9], [128.5 (2C)], 128.41 (2C), 128.35 (2C), 127.8 (2C), [127.6 (2C)], 126.6 (2C), [126.5 (2C)], 126.4, [126.3], 126.2, [126.1], [123.1], 120.8, 62.8, [62.7], 57.3, [56.9], [45.7], 44.9, [35.3], 34.0, 32.8, [32.6], 25.99 (3C), [25.97 (3C)], 24.4, [24.3], 18.4, [18.3], -5.2 (2C), [-5.3 (2C)]; IR (neat):  $\tilde{\nu}$  = 3061, 3027, 2951, 2927, 2855, 1602, 1494, 1471, 1462, 1452, 1387, 1360, 1254, 1099, 1030, 1005, 960, 938, 909, 835, 774, 734, 697, 662 cm<sup>-1</sup>; MS (ES+) *m/z* (rel. intensity) 415 (100) [M+Na]; HRMS (ES+) calcd for (C<sub>26</sub>H<sub>36</sub>OSiNa): 415.2433; found: 415.2433.

**Compound 11c.** This compound was obtained from (±)-**11b** (219 mg, 0.55 mmol) according the procedure described **8ac**. Purification by flash chromatography (petroleum ether/Et<sub>2</sub>O, 3:1 → 2:1 → 1:1) enabled partial separation of *E* and *Z* isomers, giving two fractions (43 mg, 28%, *E:Z* = 1:8) and (39 mg, 25%, *E:Z* = 3.3:1), both as colorless oils. <sup>1</sup>H NMR (500 MHz, CDCl<sub>3</sub>): (*E* isomer) δ = 7.32–7.25 (m, 6H), 7.24–7.15 (m, 4H), 5.14 (tq, *J* = 7.4, 2.4 Hz, 1H), 4.11–4.15 (m, 1H), 3.66 (t, *J* = 6.6 Hz, 2H), 3.56 (q, *J* = 8.8 Hz, 1H), 3.15–3.08 (m, 1H), 2.88–2.78 (m, 1H), 2.09 (q, *J* = 7.4 Hz, 2H), 1.63 (quint., *J* = 6.9 Hz, 2H), 1.58–1.47 (m, 1H(OH)); (*Z* isomer): δ = 7.40–7.32 (m, 6H), 7.31–7.22 (m, 4H), 5.40 (tq, *J* = 7.5, 2.3 Hz, 1H), 4.18–4.13 (m, 1H), 3.44 (t, *J* = 6.6 Hz, 2H), 3.23–3.16 (m, 1H), 2.97–2.90 (m, 1H), 1.83–1.72 (m, 2H), 1.60–1.47 (m, 1H), 1.55–1.39 (m, 1H), 1.25–0.93 (m, 1H(OH)); <sup>13</sup>C NMR (125 MHz, CDCl<sub>3</sub>): (*E* isomer) δ = 144.2, 141.8, 140.0, 128.4 (2C), 128.3 (2C), 127.7 (2C), 126.5 (2C), 126.4, 126.1, 120.3, 62.5, 57.2, 44.7, 33.9, 32.4, 24.3; (*Z* isomer): δ = 144.6, 142.9, 138.8, 128.5 (2C), 128.3 (2C), 127.6 (2C), 126.4 (2C + 1C), 126.1, 122.6, 62.4, 56.9, 45.4, 35.3, 32.3, 24.0; IR (neat):  $\tilde{\nu}$  = 3340 (br), 3059, 3025, 2932, 1601, 1493, 1451, 1180, 1049, 1030, 924, 844, 746, 698 cm<sup>-1</sup>; MS (ES+) *m/z* (rel. intensity) 301 (100), [M + Na]; HRMS calcd for (C<sub>20</sub>H<sub>22</sub>ONa): 301.1568, found: 301.1570.

The geometry of the olefin in ( $\pm$ )-**11c** was confirmed on the *Z* isomer by nOe experiments

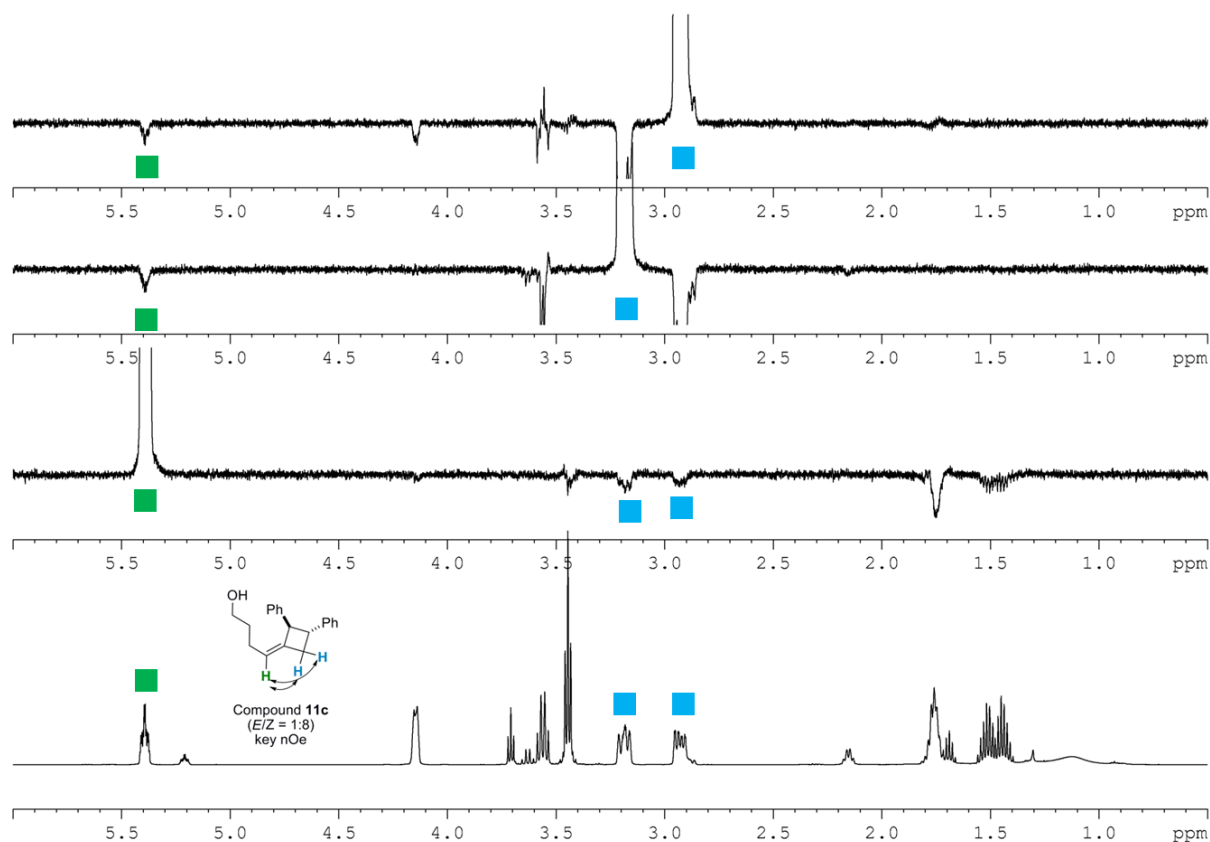

**Compound 11.** Two batches of this compound were obtained by Swern oxidation of alcohol ( $\pm$ )-**11c**: 1) a *E/Z* (3.3:1) mixture (colorless oil, 33 mg, 84%), 2) a *E/Z* (1:8) mixture (colorless oil, 39 mg, 79%). <sup>1</sup>H NMR (500 MHz, CDCl<sub>3</sub>): (*E* isomer)  $\delta$  = 9.78 (t, *J* = 1.6 Hz, 1H), 7.34–7.26 (m, 6H), 7.25–7.18 (m, 4H), 5.12 (tq, *J* = 7.3, 2.5 Hz, 1H), 4.15–4.05 (m, 1H), 3.59 (q, *J* = 8.9 Hz, 1H), 3.19–3.12 (m, 1H), 2.88–2.81 (m, 1H), 2.50 (td, *J* = 7.2, 1.5 Hz, 2H), 2.35 (q, *J* = 7.2 Hz, 2H); (*Z* isomer):  $\delta$  = 9.55 (t, *J* = 2.0 Hz, 1H), 7.37–7.34 (m, 4H), 7.39–7.30 (m, 2H), 7.29–7.21 (m, 4H), 5.36 (tq, *J* = 7.6 and 2.3 Hz, 1H), 4.16–4.12 (m, 1H), 3.55 (q, *J* = 8.4 Hz, 1H), 3.20–3.13 (m, 1H), 2.95–2.88 (m, 1H), 2.32 (dtd, *J*<sub>ABX</sub> = 17.0, 7.5 and 2.0 Hz, 1H), 2.25 (dtd, *J*<sub>ABX</sub> = 17.1, 7.1 and 2.0 Hz, 1H) and 2.06–1.95 (m, 2H); <sup>13</sup>C NMR (125 MHz, CDCl<sub>3</sub>): (*E* isomer)  $\delta$  = 202.2, 144.0, 141.6, 141.3, 128.44 (2C), 128.35 (2C), 127.7 (2C), 126.5 (2C + 1C), 126.2, 118.7, 57.2, 44.6, 43.7, 33.9, 20.9; (*Z* isomer):  $\delta$  = 202.3, 144.4, 142.5, 140.1, 128.6 (2C), 128.3 (2C), 127.6 (2C), 126.6, 126.4 (2C), 126.2, 120.8, 56.8, 45.4, 43.3, 35.2, 20.7; IR (neat):  $\tilde{\nu}$  = 3059, 3026, 2913, 2823, 2720, 1721, 1601, 1493, 1451, 1407, 1388, 1358, 1191, 1155, 1070, 1048, 1029, 993, 902, 843, 748, 697 cm<sup>-1</sup>; MS (ES<sup>+</sup>) *m/z* (rel. intensity) 331 (100) [M + MeOH + Na], 299 (20) [M + Na]; HRMS calcd for (C<sub>21</sub>H<sub>24</sub>O<sub>2</sub>Na): 331.1674, found: 331.1682; HRMS calcd for (C<sub>20</sub>H<sub>20</sub>ONa): 299.1412, found: 299.1413.

### General procedure for rhodium-catalysed hydroacylations

At room temperature, hydrogen gas (2.2 mL, 0.09 mmol) was added slowly (within 10 min) via syringe to a solution [Rh(nbd)(BINAP)]BF<sub>4</sub><sup>10</sup> (10.2 mg, 0.0113 mmol) in dry acetone (1.65 mL) in a Schlenk flask equipped with a J-Young key. The flask was then closed. After stirring for 1h, volatiles were evaporated until dryness under high vacuum. Under N<sub>2</sub>, a solution of **8c** (*E/Z* = 3:1) (15.5 mg, 0.075 mmol) in acetone (1.5 mL) was added via canula to the dry active catalyst thus prepared, and the mixture was heated in a oil bath set a 60 °C. After 44h, the solvent was evaporated and purification by flash chromatography (petroleum ether/EtOAc: 30/1 → 20/1 → 10/1) gave **9c** (11.6 mg, 75%) and **10c** (2.7 mg, 17%), both as colorless oils. See below for analytical data.

**Compound 3p.** This compound was obtained using the standard from aldehyde **1p** (17 mg, 0.057 mmol)

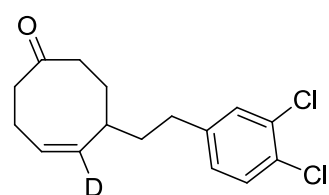

procedure {15.8 mg, 93%} or from aldehyde **2p** (10 mg, 0.0335 mmol) {3 mg, 30% + 4.6 mg, 46% of recovered **2p**}. <sup>1</sup>H NMR (500 MHz, CDCl<sub>3</sub>): δ = 7.30 (d, *J* = 8.2 Hz, 1H), 7.20 (d, *J* = 2.0 Hz, 1H), 6.94 (dd, *J* = 8.2, 2.0 Hz, 1H), 5.81 (t, *J* = 7.8 Hz, 1H), 2.58–2.54 (m, 1H), 2.55–2.50 (m, 1H), 2.50–2.36 (m, 5H), 2.27–2.14 (m, 2H), 1.67 (ddt, *J* = 13.1, 8.9, 4.0 Hz, 1H), 1.63–1.54 (m, 2H), 1.30–1.20

(m, 1H); <sup>13</sup>C NMR (100 MHz, CDCl<sub>3</sub>): δ = 214.4, 142.3, 135.4 (t, *J* = 23.5 Hz), 132.1, 130.3, 130.2, 129.7, 129.6, 127.8, 47.4, 39.8, 37.8, 36.4, 32.9, 30.1, 22.8; IR (neat):  $\tilde{\nu}$  = 2934, 2910, 2865, 2848, 1690, 1593, 1561, 1468, 1456, 1433, 1417, 1400, 1368, 1342, 1260, 1238, 1210, 1190, 1176, 1158, 1141, 1132, 1076, 1028, 984, 959, 937, 917, 903, 893, 866, 815, 715, 675 cm<sup>-1</sup>; MS (ES<sup>+</sup>): *m/z* (rel. intensity): 323 (70), 321 (100) [M + Na]; HRMS (ES<sup>+</sup>) calcd for (C<sub>16</sub>H<sub>17</sub>D<sup>35</sup>Cl<sub>2</sub>O + Na): 320.0695; found: 320.0692; calcd for (C<sub>16</sub>H<sub>17</sub>D<sup>35</sup>Cl<sup>37</sup>ClO + Na): 322.0666; found: 322.0672.

**Compound 5.** This compound was obtained from aldehyde **4** (23 mg, 0.0769 mmol) using the standard

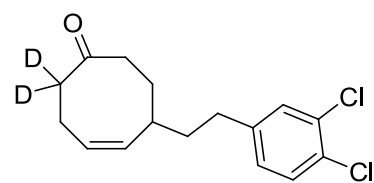

procedure, except that the reaction was carried out for 96h. White solid (15.2 mg, 66%). m.p.: 41–43 °C; <sup>1</sup>H NMR (500 MHz, CDCl<sub>3</sub>): δ = 7.30 (d, *J* = 8.2 Hz, 1H), 7.20 (d, *J* = 1.9 Hz, 1H), 6.94 (dd, *J* = 8.2, 1.9 Hz, 1H), 5.86–5.78 (m, 1H), 5.35 (ddd, *J* = 10.2, 8.8, 1.3 Hz, 1H), 2.58 (ddd, *J* = 14.0, 8.7, 5.5 Hz, 1H), 2.52–2.36 (m, 4H), 2.29–2.20 (m, 1H), 2.17 (dd, *J* = 13.7, 7.1 Hz,

1H), 1.68 (ddt, *J* = 13.0, 8.6, 4.3 Hz, 1H), 1.64–1.50 (m, 2H), 1.30–1.20 (m, 1H); <sup>13</sup>C NMR (125 MHz, CDCl<sub>3</sub>): δ = 214.6, 142.3, 135.8, 132.1, 130.3, 130.2, 129.7, 129.7, 127.8, 46.8 (quint., *J* = 20.3 Hz), 39.8, 37.8, 36.5, 32.9, 30.1, 22.7; IR (neat):  $\tilde{\nu}$  = 3053, 3010, 2926, 2854, 2218, 1703, 1593, 1561, 1472, 1456, 1397, 1346, 1317, 1261, 1198, 1132, 1097, 1030, 893, 874, 820, 726, 688, 664 cm<sup>-1</sup>; MS (ES<sup>+</sup>): *m/z* (rel. intensity): 323 (70), 321 (100) [M + Na]; HRMS (ES<sup>+</sup>) calcd for (C<sub>16</sub>H<sub>16</sub>D<sub>2</sub><sup>35</sup>Cl<sub>2</sub>O + Na): 321.0758; found: 321.0772; calcd for (C<sub>16</sub>H<sub>16</sub>D<sub>2</sub><sup>35</sup>Cl<sup>37</sup>ClO + Na): 323.0728; found: 323.0716.

**Compound 7.** This compound was obtained from aldehyde **6** (16.4 mg, 0.0548 mmol) using the standard

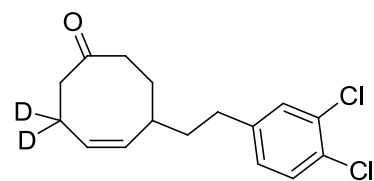

procedure, except that the reaction was carried out for 24h. White solid (14.7 mg, 90%). m.p.: 42–44 °C; <sup>1</sup>H NMR (400 MHz, CDCl<sub>3</sub>): δ = 7.30 (d, *J* = 8.2 Hz, 1H), 7.20 (d, *J* = 1.8 Hz, 1H), 6.94 (dd, *J* = 8.2, 1.8 Hz, 1H), 5.81 (d, *J* = 10.6 Hz, 1H), 5.34 (dd, *J* = 10.6, 8.8 Hz, 1H), 2.57 (ddd, *J* = 14.2, 9.0, 5.4 Hz, 1H), 2.51 (d, *J* = 12.3 Hz, 1H), 2.49–2.35 (m, 4H), 2.30–2.17 (m, 1H),

1.67 (ddt, *J* = 13.3, 8.3, 4.1 Hz, 1H), 1.64–1.53 (m, 2H), 1.32–1.19 (m, 1H); <sup>13</sup>C NMR (100 MHz, CDCl<sub>3</sub>): δ = 214.5, 142.3, 135.7, 132.1, 130.3, 130.2, 129.63, 129.59, 127.8, 47.3, 39.8, 37.8, 36.5, 32.8, 30.1, 22.1

<sup>10</sup> This compound was prepared according to Itooka, R.; Iguchi, Y.; Miyaura, N. *J. Org. Chem.* **2003**, 68, 6000.

(quint.,  $J = 20.0$  Hz); IR (neat):  $\tilde{\nu} = 3053, 3011, 2932, 2910, 2861, 2850, 2216, 2106, 1692, 1593, 1560, 1470, 1456, 1439, 1417, 1399, 1350, 1291, 1259, 1193, 1142, 1129, 1098, 1079, 1027, 1001, 966, 952, 916, 902, 879, 854, 815, 805, 761, 728, 688, 664$   $\text{cm}^{-1}$ ; MS (ES<sup>+</sup>):  $m/z$  (rel. intensity): 323 (68), 321 (100) [ $M + \text{Na}$ ]; HRMS (ES<sup>+</sup>) calcd for  $(\text{C}_{16}\text{H}_{16}\text{D}_2^{35}\text{Cl}_2\text{O} + \text{Na})$ : 321.0758; found: 321.0762; calcd for  $(\text{C}_{16}\text{H}_{16}\text{D}_2^{35}\text{Cl}^{37}\text{ClO} + \text{Na})$ : 323.0728; found: 323.0731.

**Compound 9a.** This compound was obtained from **8a** (8.9 mg, 0.041 mmol) using the general procedure (5.4 mg, 61%). Colorless oil.  $^1\text{H}$  NMR (500 MHz,  $\text{CDCl}_3$ ):  $\delta = 5.76\text{--}5.68$  (m, 1H), 5.34–5.27 (m, 1H), 2.65–2.50 (m, 2H), 2.49–2.43 (m, 1H), 2.42–2.35 (m, 1H), 2.31–2.21 (m, 1H), 2.19–2.11 (m, 1H), 1.69 (ddt,  $J = 13.1, 9.1, 3.9$  Hz, 1H), 1.38–1.13 (m, 14H), 0.85 (t,  $J = 6.8$  Hz, 3H);  $^{13}\text{C}$  NMR (125 MHz,  $\text{CDCl}_3$ ):  $\delta = 215.1, 136.9, 128.6, 47.6, 40.0, 37.3, 36.6, 31.8, 30.3, 29.6, 29.3, 27.5, 22.8, 22.6, 14.1$ ; IR (neat):  $\tilde{\nu} = 3010, 2923, 2853, 1705, 1457, 1345, 1201, 1167, 1109, 874, 738$   $\text{cm}^{-1}$ ; MS (CI):  $m/z$  (rel. intensity): 240 (100) [ $M + \text{NH}_4$ ]; elemental analysis (%) calcd for  $\text{C}_{15}\text{H}_{26}\text{O}$ : C 81.02, H 11.79; found: C 81.08, H 11.85.

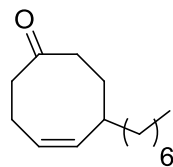

**Compound 9b.** This compound was obtained from **8b** (13 mg, 0.0345 mmol) using the general procedure (9 mg, 69%). Colorless oil.  $^1\text{H}$  NMR (500 MHz,  $\text{CDCl}_3$ ):  $\delta = 7.65$  (d,  $J = 8.2$  Hz, 2H), 7.26 (d,  $J = 8.2$  Hz, 2H), 5.78–5.70 (m, 1H), 5.28–5.21 (m, 1H), 3.10–2.98 (m, 3H), 2.60–2.50 (m, 2H), 2.48–2.35 (m, 3H), 2.40 (s, 3H), 2.30–2.21 (m, 1H), 2.20–2.12 (m, 1H), 1.66 (ddt,  $J = 13.2, 9.0, 4.1$  Hz, 1H), 1.54–1.39 (m, 4H), 1.36–1.13 (m, 3H), 0.84 (t,  $J = 7.4$  Hz, 3H);  $^{13}\text{C}$  NMR (125 MHz,  $\text{CDCl}_3$ ):  $\delta = 214.5, 142.9, 137.1, 136.0, 129.5$  (2C), 129.2, 127.1 (2C), 50.0, 48.1, 47.5, 39.8, 36.9, 33.4, 30.2, 26.7, 22.8, 21.9, 21.4, 11.2; IR (neat):  $\tilde{\nu} = 2930, 2874, 1702, 1598, 1494, 1457, 1335, 1305, 1154, 1090, 1042, 976, 874, 815, 736$   $\text{cm}^{-1}$ ; HRMS (ES<sup>+</sup>) calcd for  $(\text{C}_{21}\text{H}_{31}\text{NO}_3\text{S} + \text{Na})$ : 400.1922; found: 400.1924.

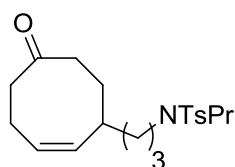

**Compound 9c.** This compound was obtained from **8c** ( $E/Z = 3:1$ ) (15.5 mg, 0.075 mmol) using the general procedure (11.6 mg, 75%). It was also obtained in lower yield (2.1 mg, 13%) from **8c** ( $E/Z < 1:20$ ) (16 mg, 0.079 mmol). Colorless oil.  $^1\text{H}$  NMR (500 MHz,  $\text{CDCl}_3$ ):  $\delta = 7.32\text{--}7.26$  (m, 2H), 7.22–7.16 (m, 3H), 5.81–5.74 (m, 1H), 5.69 (ddd,  $J = 10.6, 8.6, 1.3$  Hz, 1H), 3.59 (ddd,  $J = 12.1, 8.5, 3.3$  Hz, 1H), 2.77 (tddd,  $J = 13.5, 9.3, 4.1, 1.0$  Hz, 1H), 2.68–2.60 (m, 2H), 2.55–2.46 (m, 2H), 2.26 (ddt,  $J = 13.6, 7.0, 4.2$  Hz, 1H), 1.95 (ddt,  $J = 13.1, 8.8, 3.7$  Hz, 1H), 1.77 (tdd,  $J = 12.5, 8.7, 3.8$  Hz, 1H);  $^{13}\text{C}$  NMR (125 MHz,  $\text{CDCl}_3$ ):  $\delta = 214.1, 145.2, 135.7, 128.6$  (2C), 128.4, 127.0 (2C), 126.4, 47.6, 43.7, 40.0, 31.4, 22.5; IR (neat):  $\tilde{\nu} = 3063, 3026, 2924, 2854, 1703, 1602, 1492, 1454, 1342, 1164, 1062, 885, 874, 760, 737, 701$   $\text{cm}^{-1}$ ; MS (CI):  $m/z$  (rel. intensity): 218 (100) [ $M + \text{NH}_4$ ], 183 (14); elemental analysis (%) calcd for  $\text{C}_{14}\text{H}_{16}\text{O}$ : C 83.96, H 8.05; found: C 84.61, H 8.50.

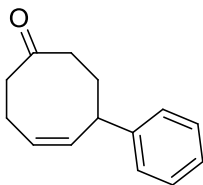

**Compound 10c.** This compound was obtained from **8c** ( $E/Z = 3:1$ ) (15.5 mg, 0.075 mmol) using the general procedure (2.7 mg, 17%). It was also obtained (2.1 mg, 13%) from **8c** ( $E/Z < 1:20$ ) (16 mg, 0.079 mmol) after difficult separation from the recovered starting material (2.1 mg, 13%) by preparative TLC (petroleum ether/EtOAc = 20:1, two elutions) (6.1 mg, 38%). White solid. m.p.: 27–30 °C.  $^1\text{H}$  NMR (500 MHz,  $\text{CDCl}_3$ ):  $\delta = 7.36\text{--}7.32$  (m, 2H), 7.30–7.25 (m, 2H), 7.23–7.18 (m, 1H), 5.85 (td,  $J = 9.7, 7.1$  Hz, 1H), 5.75 (td,  $J = 10.2, 7.6$  Hz, 1H), 3.97 (dd,  $J = 12.2, 3.5$  Hz, 1H), 2.76–2.70 (m, 1H), 2.67 (ddd,  $J = 13.6, 9.2, 4.5$  Hz, 1H), 2.39–2.24 (m, 3H), 2.17 (dtd,  $J = 13.6, 9.2, 3.8$  Hz, 1H), 1.94 (tdd,  $J = 12.5, 8.4, 3.9$  Hz, 1H), 1.63 (ddt,  $J = 12.9, 9.2, 3.6$  Hz, 1H);  $^{13}\text{C}$  NMR (125 MHz,  $\text{CDCl}_3$ ):  $\delta = 213.5, 140.1, 130.7, 129.8, 128.4$  (2C), 128.1 (2C), 126.9, 55.6, 46.7, 31.7, 25.9, 22.4; IR (neat):  $\tilde{\nu} = 3061, 3021, 2855, 2926, 1708, 1650, 1600, 1496, 1464, 1453, 1360, 1328,$

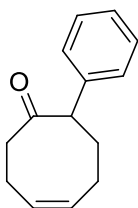

1210, 1184, 1152, 1097, 1032, 974, 892, 734, 699  $\text{cm}^{-1}$ ; elemental analysis (%) calcd for  $\text{C}_{14}\text{H}_{16}\text{O}$ : C 83.96, H 8.05; found: C 83.75, H 8.15.

**Compound 9d.** This compound was obtained from **8d** ( $E/Z = 19:1$ ) (15mg, 0.049 mmol) using the general procedure (14 mg, 93%). It was also obtained in lower yield (8 mg, 27%) from **8d** ( $E/Z$

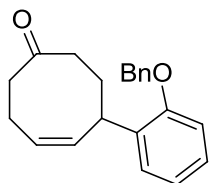

<1:20) (30 mg, 0.098 mmol). Colorless oil.  $^1\text{H}$  NMR (500 MHz,  $\text{CDCl}_3$ ):  $\delta = 7.43\text{--}7.35$  (m, 4H), 7.33–7.28 (m, 1H), 7.23 (dd,  $J = 7.6, 1.7$  Hz, 1H), 7.16 (td,  $J = 7.8, 1.6$  Hz, 1H), 6.94 (td,  $J = 7.5, 1.1$  Hz, 1H), 6.90 (dd,  $J = 8.3, 0.8$  Hz, 1H), 5.78–5.63 (m, 2H), 5.05 (s, 2H), 4.25 (ddd,  $J = 11.4, 8.3, 4.0$  Hz, 1H), 2.81 (tdd,  $J = 13.7, 9.2, 4.4$  Hz, 1H), 2.71–2.59 (m, 2H), 2.51–2.41 (m, 2H), 2.18 (ddt,  $J = 13.7, 6.7, 4.2$  Hz, 1H), 1.95–1.80 (m, 2H);  $^{13}\text{C}$

NMR (125 MHz,  $\text{CDCl}_3$ ):  $\delta = 214.3, 155.8, 137.3, 135.5, 133.9, 128.47$  (2C), 128.45, 127.7, 127.3, 127.14, 127.06 (2C), 121.2, 112.2, 70.2, 47.7, 40.3, 37.0, 30.3, 22.3; IR (neat):  $\tilde{\nu} = 3062, 3031, 2923, 1702, 1599, 1583, 1490, 1450, 1380, 1343, 1291, 1239, 1163, 1105, 1047, 1024, 972, 875, 849, 800, 751, 735, 697$   $\text{cm}^{-1}$ ; HRMS (ES+) calcd for  $(\text{C}_{21}\text{H}_{22}\text{O}_2 + \text{Na})^+$ : 329.1517; found: 329.1509.

**Compound 10d.** This compound was obtained from **8d** ( $E/Z < 1:20$ ) (30 mg, 0.098 mmol) using the general procedure. Initially a mixture of **8d/9d/10d** = 1:1:5.75 (18.6 mg, 62%) was obtained and an analytically pure sample was then obtained by preparative TLC (petroleum ether/EtOAc: 4/1). Colorless oil.

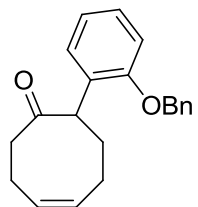

$^1\text{H}$  NMR (500 MHz,  $\text{CDCl}_3$ ):  $\delta = 7.43\text{--}7.36$  (m, 5H), 7.35–7.31 (m, 1H), 7.16 (td,  $J = 7.8, 1.7$  Hz, 1H), 6.96 (td,  $J = 7.6, 1.1$  Hz, 1H), 6.84 (dd,  $J = 8.2, 1.0$  Hz, 1H), 5.82–5.68 (m, 2H), 5.04 (d,  $J = 11.6$  Hz, 1H), 5.01 (d,  $J = 11.5$  Hz, 1H), 4.46 (dd,  $J = 12.3, 3.5$  Hz, 1H), 2.69 (ddd,  $J = 11.7, 7.6, 4.0$  Hz, 1H), 2.56 (dtd,  $J = 13.9, 9.1, 4.4$  Hz, 1H), 2.31 (dtd,  $J = 14.3, 7.3, 3.7$  Hz, 1H), 2.24–2.10 (m, 3H), 1.92 (tdd,  $J = 12.4, 8.4, 3.9$  Hz, 1H), 1.73 (ddt,  $J = 12.8, 9.3, 3.6$  Hz, 1H);  $^{13}\text{C}$  NMR (125 MHz,  $\text{CDCl}_3$ ):  $\delta = 214.9, 155.5, 136.8, 130.4, 130.2, 129.6, 128.6$  (2C), 128.10, 128.07, 127.6 (2C), 127.5, 121.1, 111.1, 70.2, 47.5, 46.7, 28.7, 25.5, 22.3; IR (neat):  $\tilde{\nu} = 3064, 3018, 2932, 2861, 1707, 1599, 1586, 1489, 1451, 1380, 1322, 1290, 1236, 1189, 1152, 1118, 1100, 1082, 1051, 1012, 895, 855, 747, 732, 696$   $\text{cm}^{-1}$ ; HRMS (ES+) calcd for  $(\text{C}_{21}\text{H}_{22}\text{O}_2 + \text{Na})$ : 329.1517; found: 329.1510.

**Compound 9e.** This compound was obtained from **8e** ( $E/Z > 20:1$ ) (21 mg, 0.0686 mmol) using the standard procedure. White solid (19 mg, 90%). m.p.: 53–55  $^\circ\text{C}$ ;  $^1\text{H}$  NMR (500 MHz,  $\text{CDCl}_3$ ):  $\delta = 7.41$  (d,  $J = 7.6$  Hz, 2H), 7.37 (t,  $J = 7.6$  Hz, 2H), 7.30 (t,  $J = 7.2$  Hz, 1H), 7.12 (d,  $J = 8.5$  Hz, 2H), 6.91 (d,  $J = 8.5$  Hz, 2H), 5.80–5.72 (m, 1H), 5.66

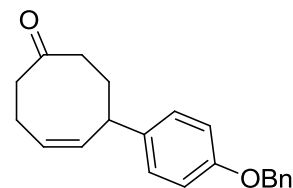

(dd,  $J = 10.4, 8.9$  Hz, 1H), 5.03 (s, 2H), 3.54 (ddd,  $J = 12.2, 9.0, 3.1$  Hz, 1H), 2.75 (tdd,  $J = 13.4, 9.4, 4.1$  Hz, 1H), 2.67–2.59 (m, 2H), 2.55–2.45 (m, 2H), 2.25 (ddt,  $J = 13.6, 7.0, 4.2$  Hz, 1H), 1.93 (ddt,  $J = 13.0, 9.1, 3.9$  Hz, 1H), 1.73 (tdd,  $J = 12.6, 8.6, 3.8$  Hz, 1H);  $^{13}\text{C}$  NMR (125 MHz,  $\text{CDCl}_3$ ):  $\delta = 214.1, 157.3, 137.6, 137.1, 136.0, 128.5$  (2C), 128.1, 127.93 (2C), 127.89, 127.4 (2C), 114.9 (2C), 70.1, 47.6, 42.8, 40.0, 31.5, 22.5; IR (neat):  $\tilde{\nu} = 3066, 3026, 2925, 2876, 1694, 1609, 1583, 1511, 1452, 1417, 1386, 1347, 1242, 1225, 1182, 1165, 1109, 1065, 1025, 871, 881, 832, 819, 735, 695$   $\text{cm}^{-1}$ ; HRMS (ES+) calcd for  $(\text{C}_{21}\text{H}_{22}\text{O}_2 + \text{Na})$ : 329.1517; found: 329.1528.



**Compound 10e.** This compound was obtained from **8e** ( $E/Z < 20:1$ ) (7 mg, 0.0229 mmol) using the standard procedure. Colorless oil (4.2 mg, 60%).  $^1\text{H}$  NMR (500 MHz,  $\text{CDCl}_3$ ):  $\delta$  = 7.42–7.40 (m, 2H), 7.38–7.33 (m, 2H), 7.32–7.27 (m, 1H), 7.27–7.24 (m, 2H), 6.92–6.85 (m, 2H), 5.83 (td,  $J$  = 10.3, 7.2 Hz, 1H), 5.73 (td,  $J$  = 9.9, 7.4 Hz, 1H), 5.01 (s, 2H), 3.91 (dd,  $J$  = 12.2, 3.5 Hz, 1H), 2.74–2.60 (m, 2H), 2.97–2.27 (m, 3H), 2.15 (dtd,  $J$  = 13.1, 9.1, 3.3 Hz, 1H), 1.90 (tdd,  $J$  = 12.4, 8.1, 3.6 Hz, 1H), 1.60 (ddt,  $J$  = 12.9, 9.2, 3.7 Hz, 1H);  $^{13}\text{C}$  NMR (125 MHz,  $\text{CDCl}_3$ ):  $\delta$  = 214.0, 157.9, 137.1, 132.5, 130.7, 129.8, 129.0 (2C), 128.6 (2C), 127.9, 127.4 (2C), 114.8 (2C), 70.0, 54.6, 46.6, 31.8, 25.9, 22.3; IR (neat):  $\tilde{\nu}$  = 3016, 2972, 2936, 2918, 2895, 1707, 1068, 1581, 1508, 1460, 1452, 1436, 1385, 1363, 1331, 1303, 1272, 1235, 1195, 1180, 1119, 1106, 1080, 1069, 1040, 1030, 1007, 976, 923, 892, 847, 820, 800, 754, 736, 702  $\text{cm}^{-1}$ ; HRMS (ES+) calcd for ( $\text{C}_{21}\text{H}_{22}\text{O}_2 + \text{Na}$ ): 329.1517; found: 329.1511.

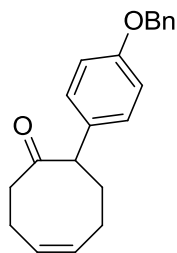

**Compound 9f.** This compound was obtained from **8f** ( $E/Z > 20:1$ ) (15 mg, 0.056 mmol) using the standard procedure. Colorless oil (14 mg, 93%).  $^1\text{H}$  NMR (500 MHz,  $\text{CDCl}_3$ ):  $\delta$  = 7.36–7.33 (m, 1H), 7.23–7.20 (m, 2H), 5.85–5.76 (m, 1H), 5.49 (ddd,  $J$  = 10.2, 8.5, 1.2 Hz, 1H), 4.12–4.03 (m, 1H), 2.91 (tddd,  $J$  = 13.7, 9.7, 4.2, 1.2 Hz, 1H), 2.86–2.75 (m, 2H), 2.65–2.44 (m, 2H), 2.29 (ddt,  $J$  = 13.6, 7.0, 4.2 Hz, 1H), 1.88–1.74 (m, 2H);  $^{13}\text{C}$  NMR (125 MHz,  $\text{CDCl}_3$ ):  $\delta$  = 213.5, 140.9, 134.1, 133.4, 132.6, 129.9, 129.3, 128.3, 127.5, 47.6, 39.9, 39.6, 30.4, 22.5; IR (neat):  $\tilde{\nu}$  = 3020, 2928, 2869, 1702, 1587, 1560, 1473, 1439, 1383, 1343, 1191, 1165, 1145, 1103, 1070, 1046, 969, 867, 846, 812, 774, 728  $\text{cm}^{-1}$ ; MS (ES+):  $m/z$  (rel. intensity): 293 (60), 291 (100) [ $\text{M} + \text{Na}$ ]; HRMS (ES+) calcd for ( $\text{C}_{14}\text{H}_{14}^{35}\text{Cl}_2\text{O} + \text{Na}$ ): 291.0319; found: 291.0319.

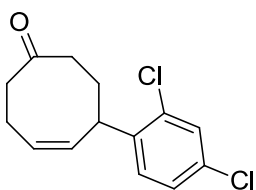

**Compound 9g.** This compound was obtained from **8g** ( $E/Z = 1:3$ ) (28 mg, 0.11 mmol) using the standard procedure except that the reaction was stopped after 90h. White solid (8 mg, 29%). m.p.: 52–55  $^{\circ}\text{C}$ ;  $^1\text{H}$  NMR (500 MHz,  $\text{CDCl}_3$ ):  $\delta$  = 7.96 (d,  $J$  = 8.4 Hz, 2H), 7.27 (d,  $J$  = 8.4 Hz, 2H), 5.85–5.77 (m, 1H), 5.65 (ddd,  $J$  = 10.4, 8.9, 1.3 Hz, 1H), 3.88 (s, 3H), 3.64 (ddd,  $J$  = 12.1, 8.8, 3.2 Hz, 1H), 2.76 (tddd,  $J$  = 13.6, 9.5, 4.1 Hz, 1H), 1.95 (ddt,  $J$  = 13.0, 9.0, 3.8 Hz, 1H), 1.77 (tdd,  $J$  = 12.7, 8.8, 3.9 Hz, 1H);  $^{13}\text{C}$  NMR (125 MHz,  $\text{CDCl}_3$ ):  $\delta$  = 213.9, 166.9, 150.3, 134.6, 130 (2C), 129.1, 128.4, 127.1 (2C), 52.0, 47.5, 43.7, 39.9, 31.0, 22.6; IR (neat):  $\tilde{\nu}$  = 2954, 2863, 1710, 1693, 1608, 1436, 1418, 1396, 1338, 1311, 1279, 1251, 1192, 1179, 1165, 1107, 1070, 1018, 968, 957, 895, 878, 855, 815, 771, 746, 710  $\text{cm}^{-1}$ ; MS (ES+):  $m/z$  (rel. intensity): 281 (100) [ $\text{M} + \text{Na}$ ]; HRMS (ES+) calcd for ( $\text{C}_{16}\text{H}_{18}\text{O}_3 + \text{Na}$ ): 281.1154; found: 281.1153.

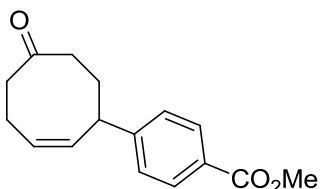

**Compound 10g.** This compound was obtained from **8g** ( $E/Z = 1:3.3$ ) (28 mg, 0.11 mmol) using the standard procedure except that the reaction was stopped after 90h. Colorless oil (12 mg, 38%). This sample was obtained as an inseparable **8g/10g** = 1:7.3 mixture and the indicated yield reflects this ratio. Further purification by preparative TLC (petroleum ether/EtOAc = 6:1) gave a sample of **8g/10g** = 1:20 which was used for characterization.  $^1\text{H}$  NMR (500 MHz,  $\text{CDCl}_3$ ):  $\delta$  = 7.94 (d,  $J$  = 8.2 Hz, 2H), 7.41 ( $J$  = 8.2 Hz, 2H), 5.86 (td,  $J$  = 9.8, 7.3 Hz, 1H), 5.75 (td,  $J$  = 9.7, 7.7 Hz, 1H), 4.04 (dd,  $J$  = 12.1, 3.4 Hz, 1H), 3.87 (s, 3H), 2.77–2.63 (m, 2H), 2.42–2.34 (m, 1H), 2.34–2.25 (m, 2H), 2.18 (dtd,  $J$  = 13.3, 9.3, 3.7 Hz, 1H), 1.93 (tdd,  $J$  = 12.4, 8.3, 3.7 Hz, 1H), 1.63 (ddt,  $J$  = 12.9, 9.1, 3.7 Hz, 1H);  $^{13}\text{C}$  NMR (125 MHz,  $\text{CDCl}_3$ ):  $\delta$  = 212.8, 167.0, 145.1, 130.6, 129.9, 129.7 (2C), 128.8, 128.1 (2C), 55.5, 52.0, 46.8, 31.8, 25.8, 22.2; IR (neat):  $\tilde{\nu}$  = 3026, 2951, 2909, 2849, 1720, 1700, 1608, 1573, 1437, 1420, 1349, 1323, 1310, 1280, 1265, 1246, 1185, 1171, 1063, 1017, 977, 968, 898, 874, 855, 839, 813, 779, 752, 736, 709  $\text{cm}^{-1}$ ; MS (ES+):

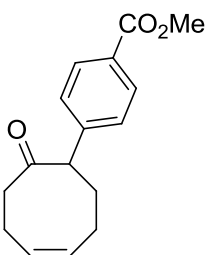

$m/z$  (rel. intensity): 281 (100) [M + Na]; HRMS (ES+) calcd for (C<sub>16</sub>H<sub>18</sub>O<sub>3</sub>+ Na): 281.1154; found: 281.1153.

**Compound 12.** This compound was obtained from **11** ( $E/Z = 3.3:1$ ) (15 mg, 0.0543 mmol) using the standard procedure. White solid (11.2 mg, 75%). m.p.: 127–130 °C; <sup>1</sup>H NMR (500 MHz, CDCl<sub>3</sub>): δ = 7.09–6.89 (m, 10H), 5.74 (td,  $J = 10.8, 7.4$  Hz, 1H), 5.70 (tdd,  $J = 10.7, 6.3, 1.1$  Hz, 1H), 4.02 (dd,  $J = 10.6, 7.2$  Hz, 1H), 3.27–3.14 (m, 3H), 2.79 (ddd,  $J = 13.0, 5.0, 3.1$  Hz, 1H), 2.54–2.48 (m, 1H), 2.46 (td,  $J = 13.3, 4.9$  Hz, 1H), 2.38–2.30 (m, 1H); <sup>13</sup>C NMR (125 MHz, CDCl<sub>3</sub>): δ = 211.7, 143.8, 143.6, 136.4, 129.2, 128.1 (4C), 128.1 (2C), 127.7 (2C), 125.9, 125.8, 50.7, 48.7, 47.9, 47.2, 22.2; IR (neat):  $\tilde{\nu} = 3030, 2937, 1698, 1602, 1494, 1454, 1421, 1331, 1221, 1184, 1164, 1123, 1103, 1075, 1022, 787, 765, 754, 732, 702$  cm<sup>-1</sup>; MS (ES+):  $m/z$  (rel. intensity): 299 (100) [M + Na]; HRMS (ES+) calcd for (C<sub>20</sub>H<sub>20</sub>O+ Na): 299.1412; found: 299.1414.

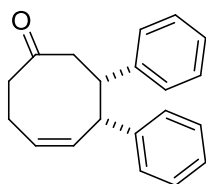

**Compound 13.** This compound was obtained from **11** ( $E/Z = 1:8$ ) (18 mg, 0.0652 mmol) using the standard procedure. White solid (6 mg, 33%). m.p.: 124–126 °C; <sup>1</sup>H NMR (500 MHz, CDCl<sub>3</sub>): δ = 7.24–7.21 (m, 2H), 7.12–6.97 (m, 8H), 6.11–6.01 (m, 1H), 5.80 (td,  $J = 10.2, 7.3$  Hz, 1H), 4.34 (d,  $J = 11.6$  Hz, 1H), 3.32 (dt,  $J = 11.5, 5.1$  Hz, 1H), 2.86 (td,  $J = 10.9, 4.3$  Hz, 1H), 2.71–2.60 (m, 1H), 2.49 (ddd,  $J = 14.1, 9.7, 4.5$  Hz, 1H), 2.45–2.34 (m, 3H); <sup>13</sup>C NMR (125 MHz, CDCl<sub>3</sub>): δ = 213.1, 142.7, 137.3, 130.8, 129.1, 129.0 (2C), 128.10 (2C), 128.05 (2C), 127.9 (2C), 126.7, 126.1, 60.2, 47.3, 46.0, 33.9, 23.4; IR (neat):  $\tilde{\nu} = 3060, 3028, 2970, 2934, 2859, 1701, 1601, 1493, 1454, 1434, 1342, 1318, 1292, 1227, 1193, 1164, 1099, 1071, 1030, 1015, 846, 770, 736, 722, 707, 695$  cm<sup>-1</sup>; MS (ES+):  $m/z$  (rel. intensity): 299 (100) [M + Na]; HRMS (ES+) calcd for (C<sub>20</sub>H<sub>20</sub>O+ Na): 299.1412; found: 299.1414.

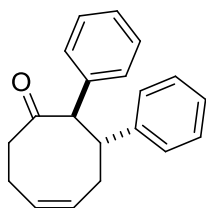

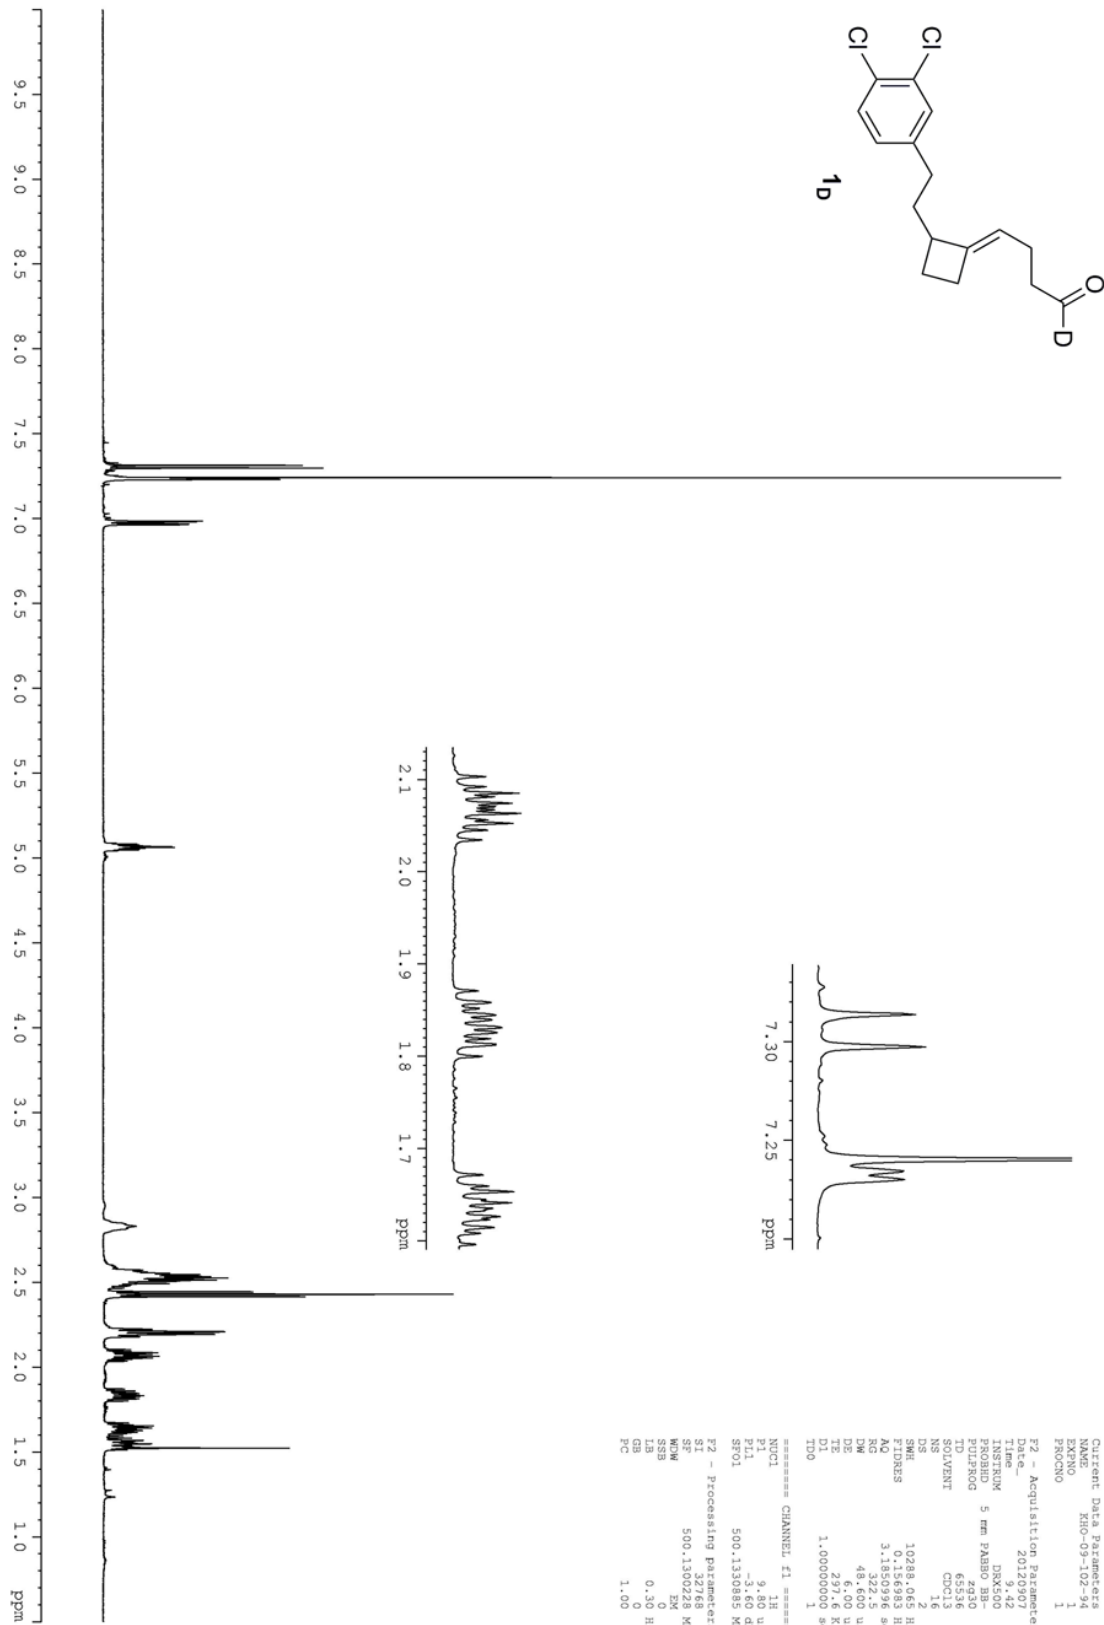

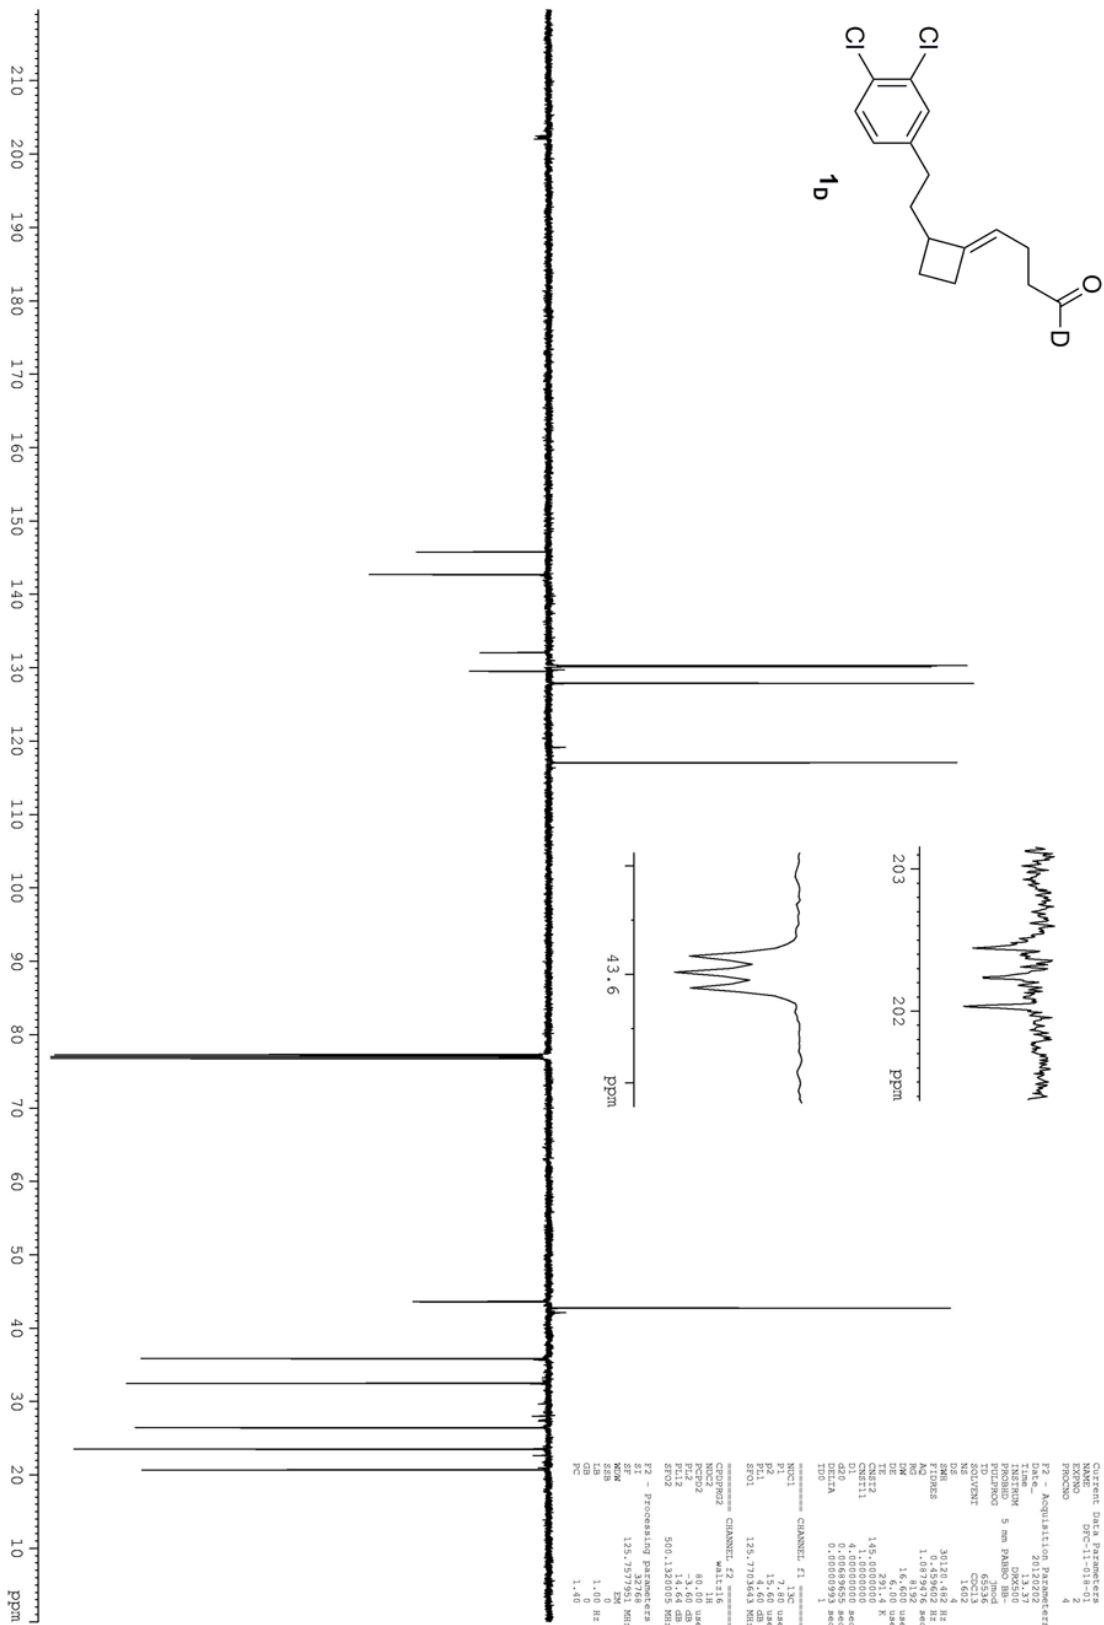

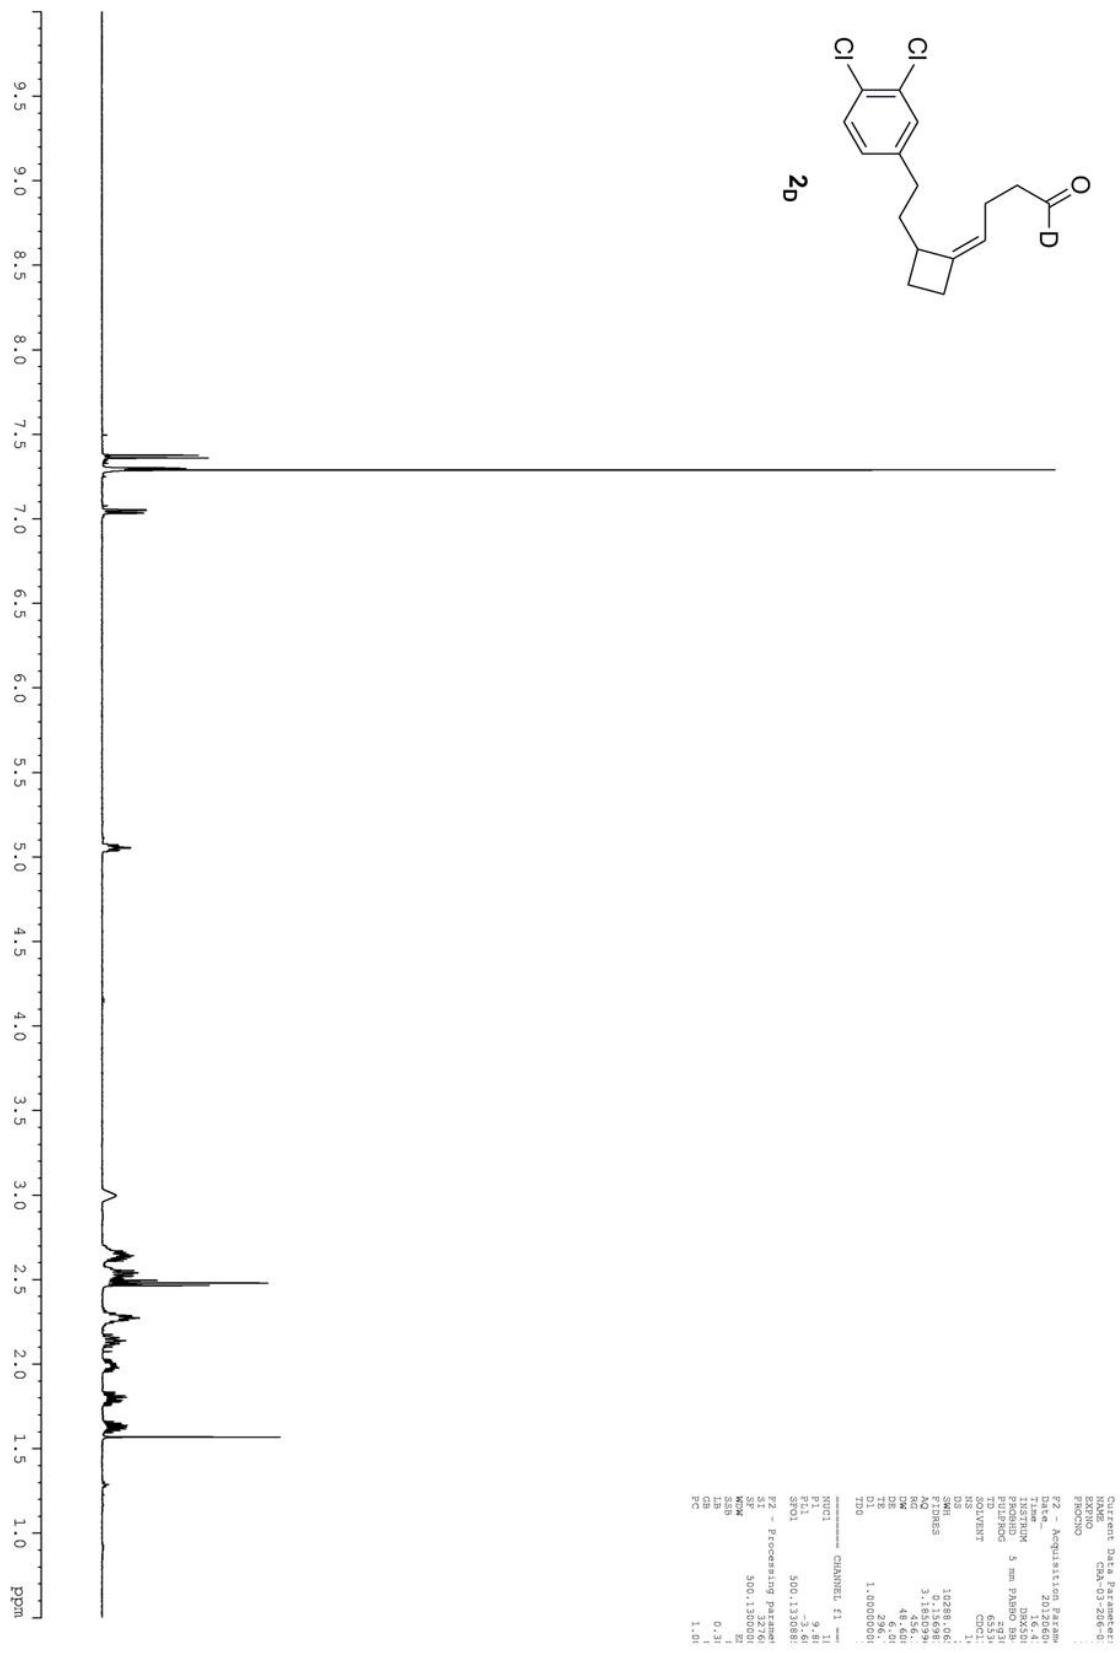

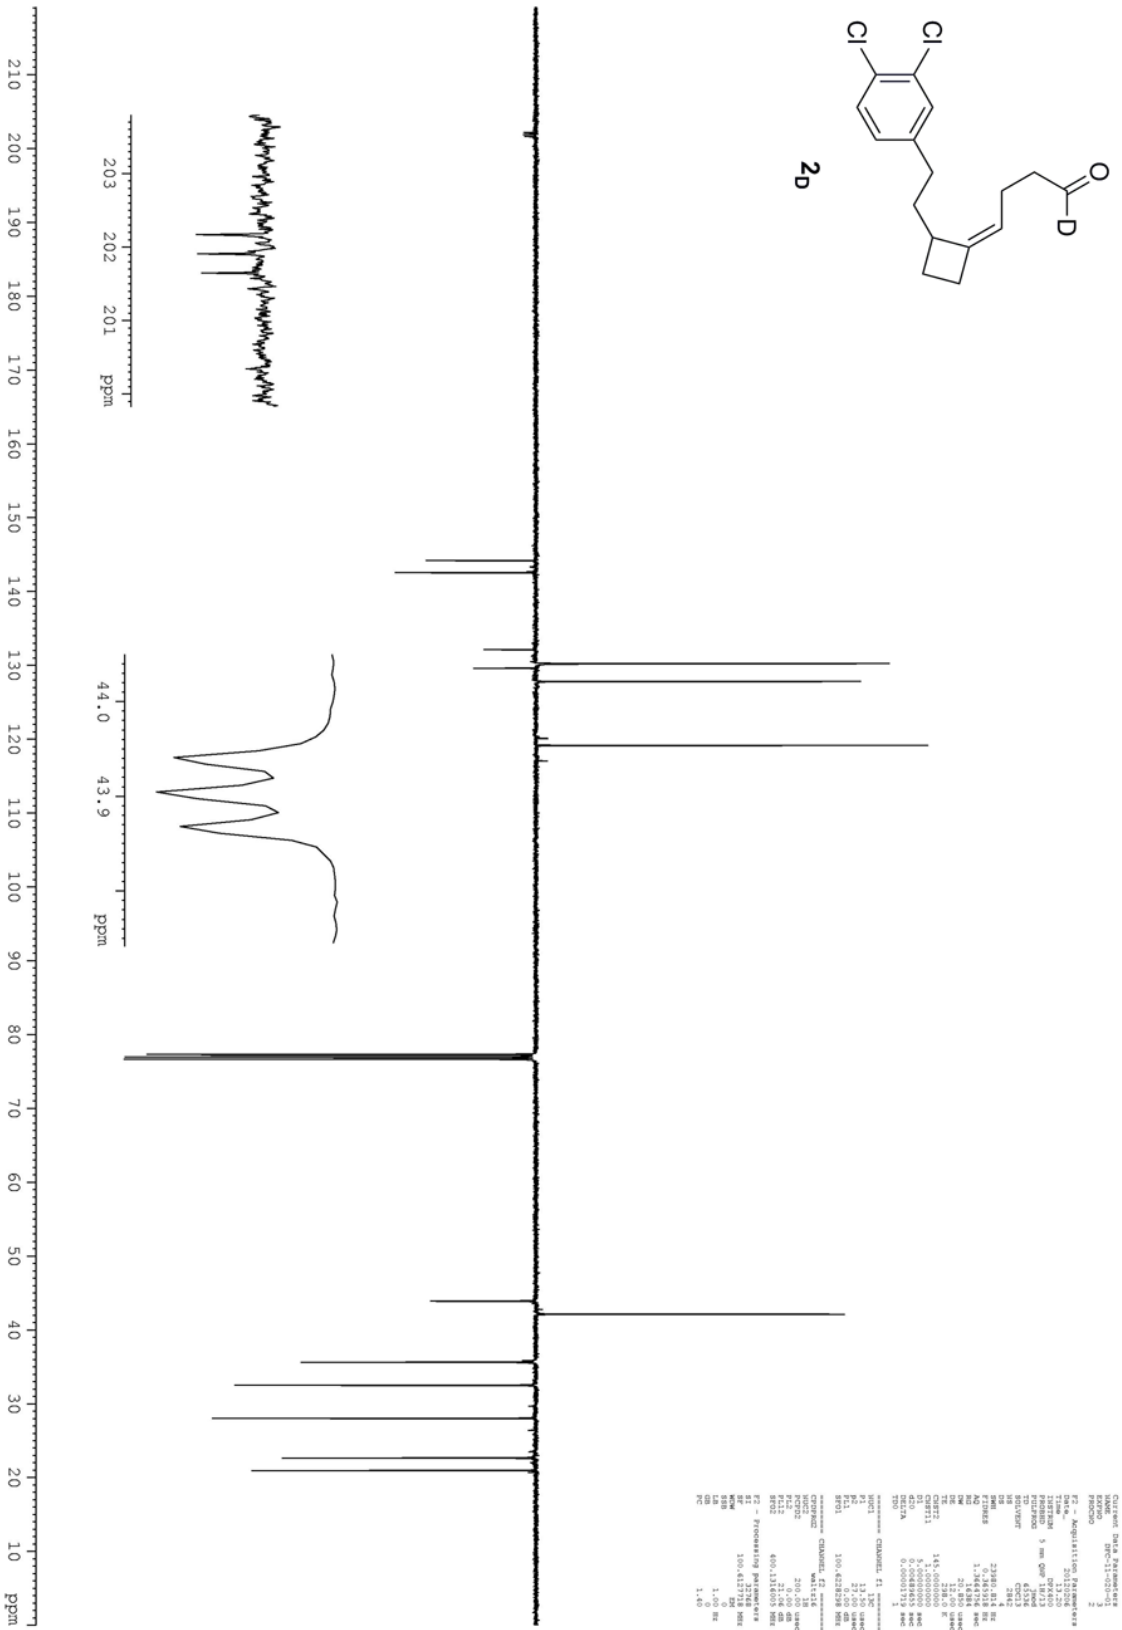

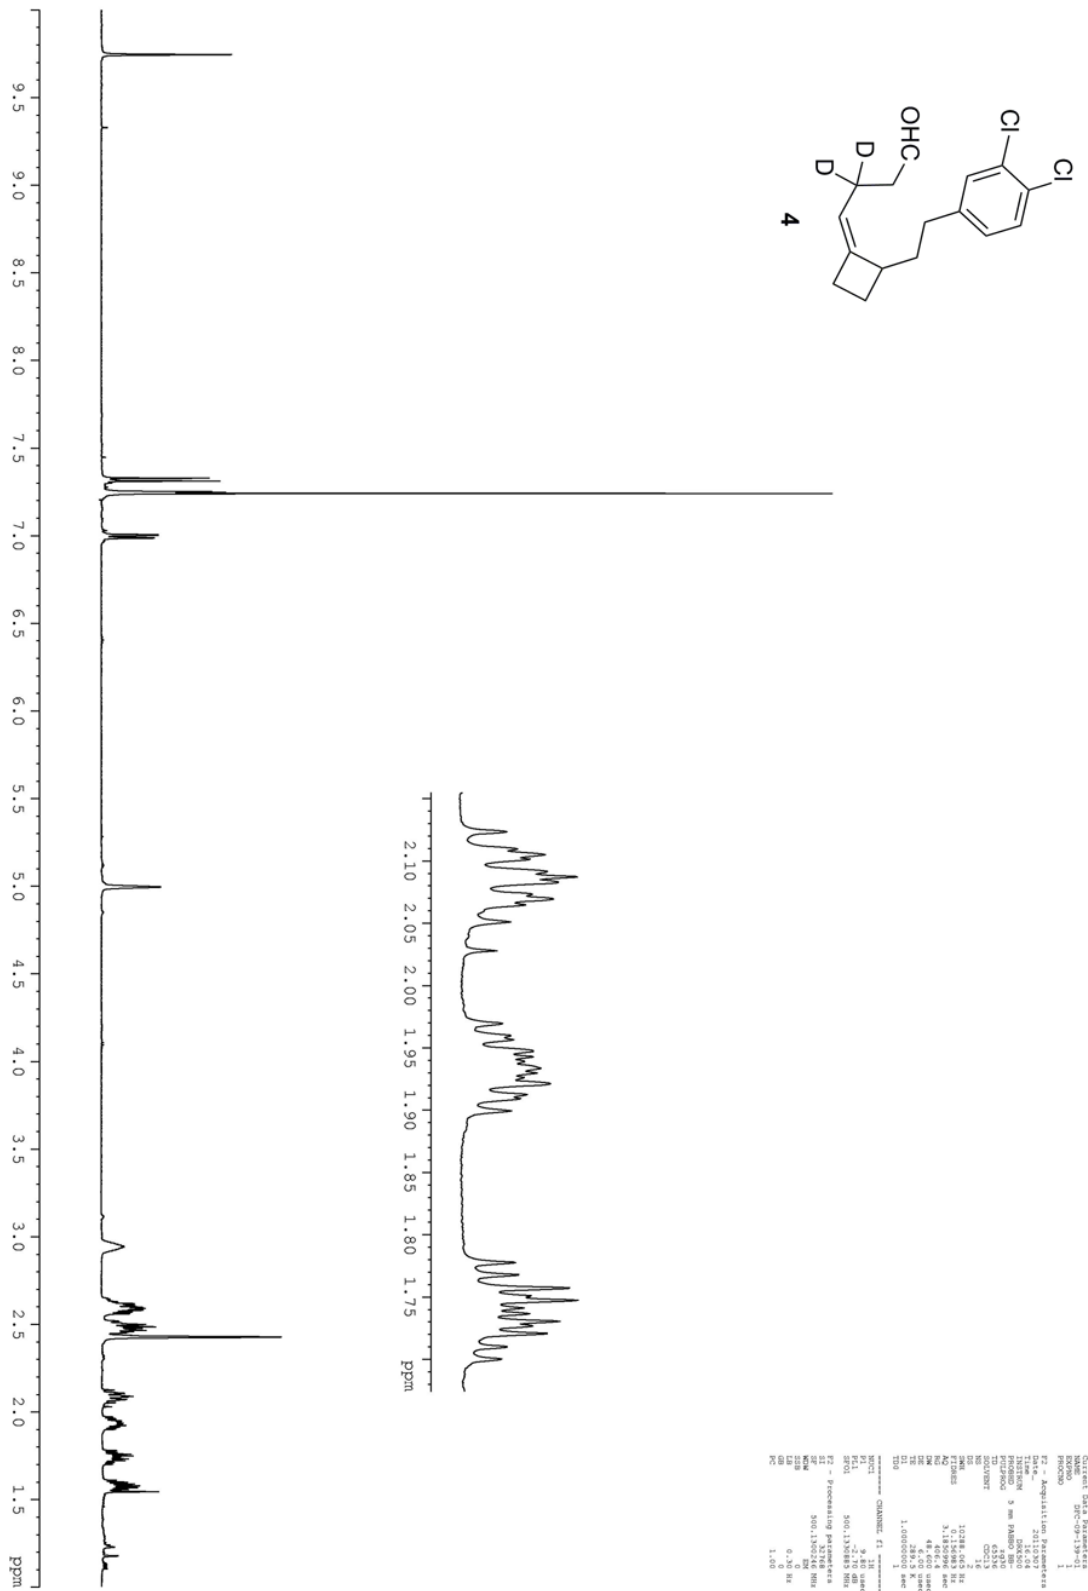

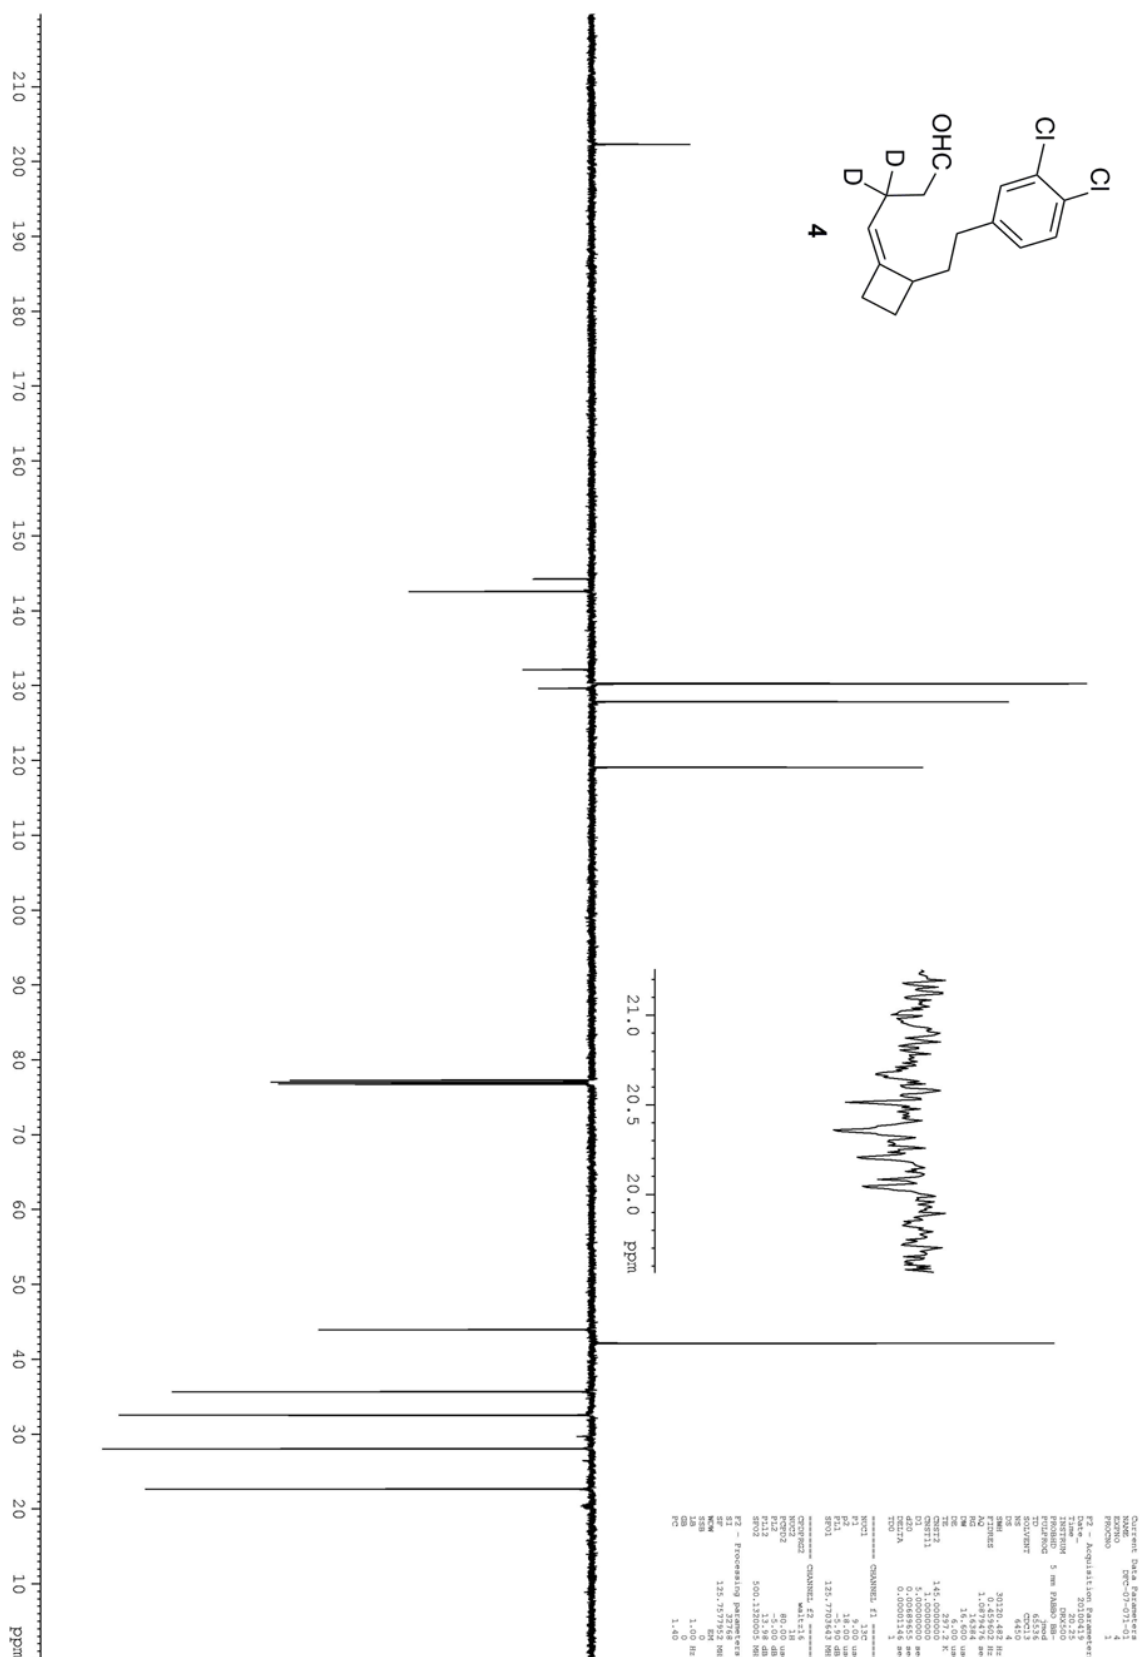



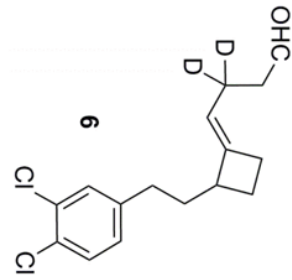

Current Data Parameters  
NAME: 20110902-1  
EXPNO: 4  
PROCNO: 1  
F2 - Acquisition Parameters  
Date\_ Acquired: 20110902  
Time: 10:45  
INSTRUM: spect  
PROBHD: 5 mm PABBO BB-CP  
TD: 65536  
FIDRES: 0.15683 Hz  
AQ: 0.00216 sec  
RG: 327.68  
WDW: EM  
SSB: 0  
LB: 3.00 Hz  
GB: 0  
PC: 1.00

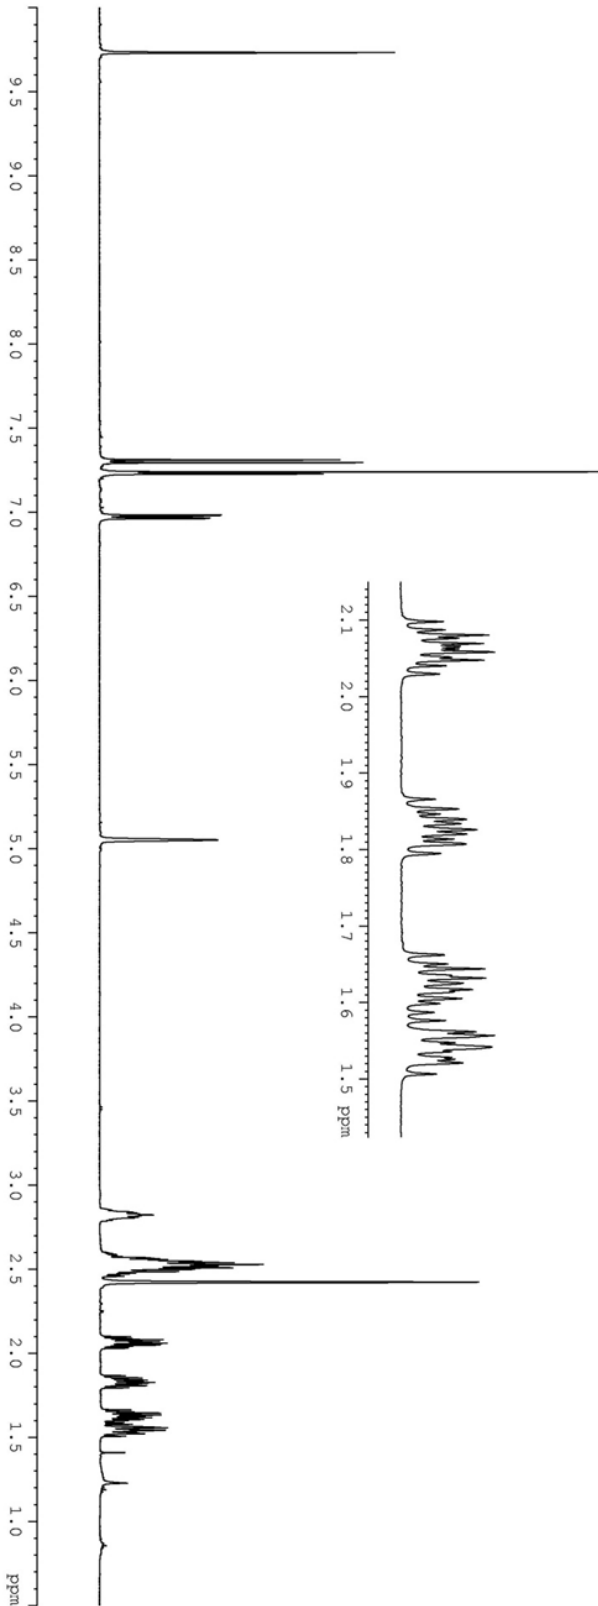

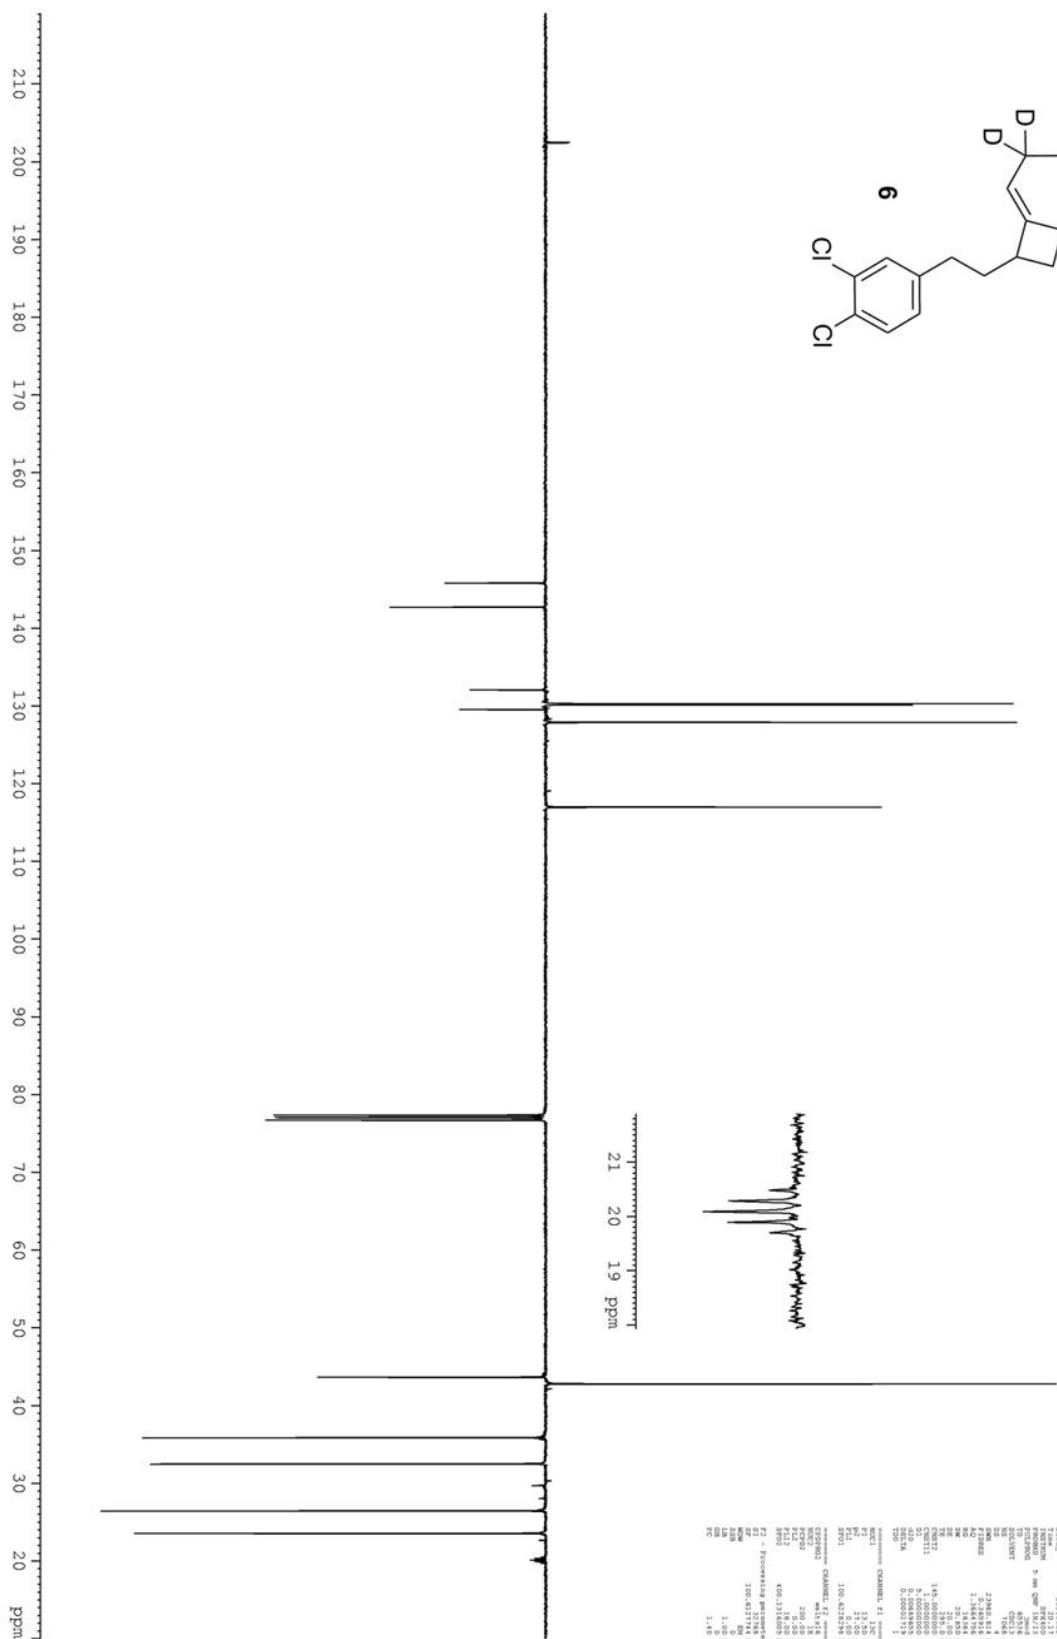[illegible]

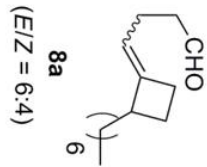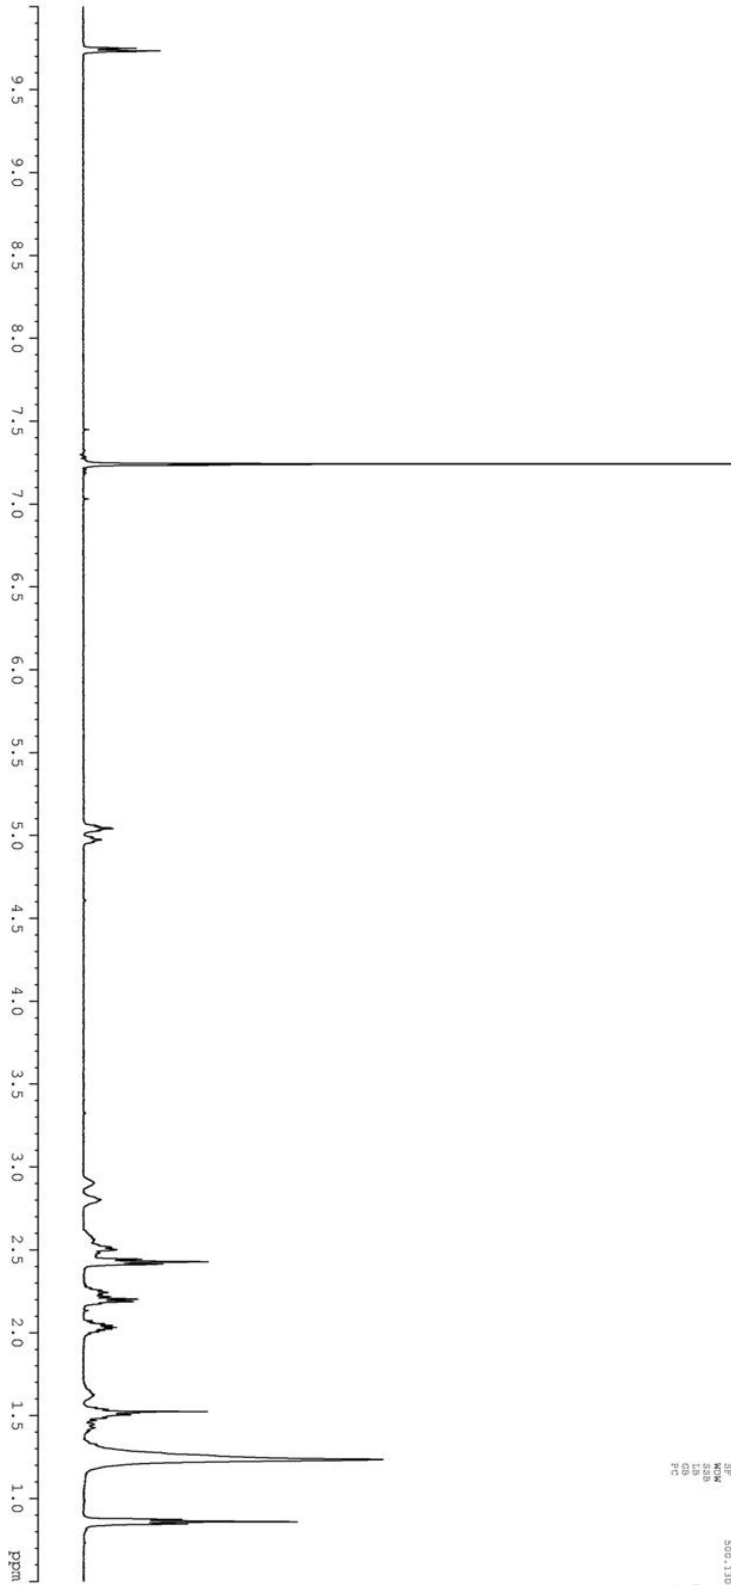

===== CHANNEL f1 =====  
NAME CMA-03-178-0  
EXPNO 1  
PROCNO 1  
P2 - Acquisition Parameters  
Date\_ 20120427  
Time 14:44  
INSTRUM 5 mm PABBO RS  
PULPROG zgpg30  
TD 65536  
SOLVENT CDCl3  
DS 4  
SWH 10284.862  
FIDRES 0.000488  
AQ 3.1850994  
RG 48.000  
DE 6.20  
TE 296.2  
TDO 1.0000000  
===== CHANNEL f1 =====  
NUC1 1H  
P1 9.80  
F1 500.13646  
SFO1 500.1360882  
P2 - Processing parameters  
SI 32768  
SF 500.1360220  
WDW EM  
SSB 0  
LB 0.31  
GB 0  
PC 1.00

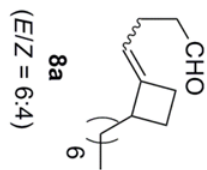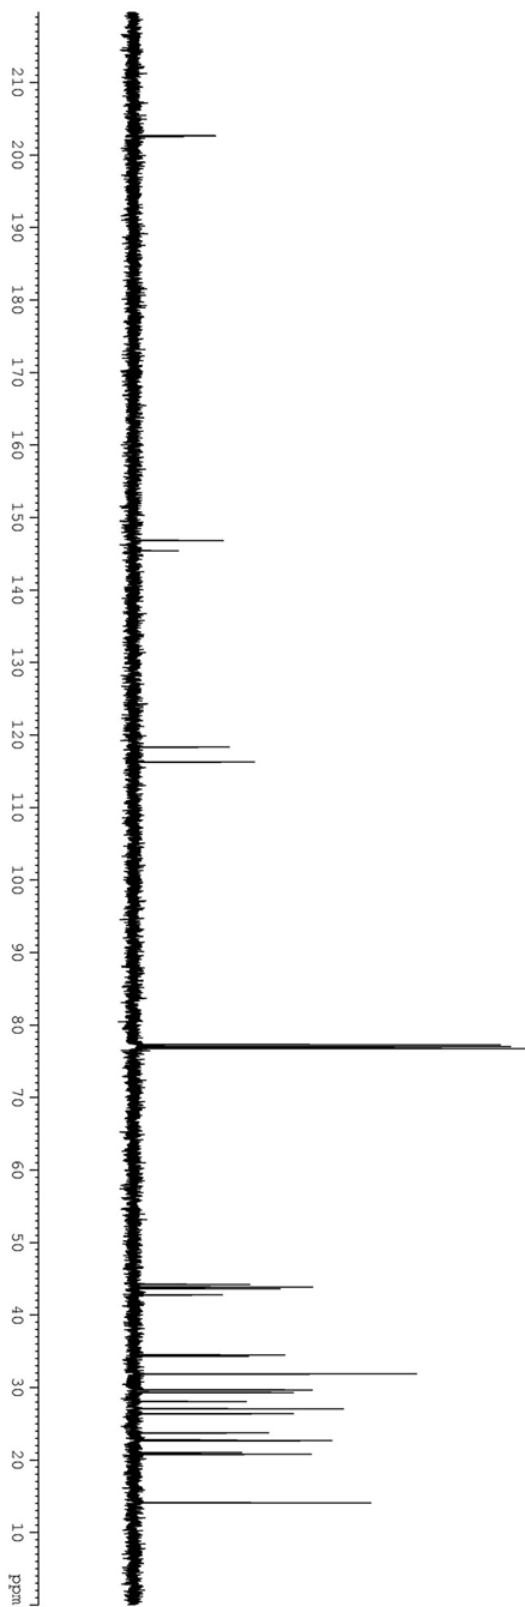

Current Data Parameters  
NAME CA-01-18-04  
INSTRUM 5 mm BBO-1H  
PROCNO 1  
F2 - Acquisition Parameters  
Date\_ 20180417  
Time\_ 11:54:54  
INSTRUM 5 mm BBO-1H  
PROBHD 5 mm BBO-1H  
PULPROG zgpg30  
SOLVENT CDCl3  
NS 2  
DS 4  
SWH 10120.482 Hz  
AQ 0.00000000 sec  
RG 1.00000000 sec  
DE 1.00000000 sec  
TE 300.2 K  
D1 2.00000000 sec  
DELTA 1.00000000 sec  
TNO 1  
===== CHANNEL f1 =====  
NUC1 13C  
P1 7.40 usec  
PL1 0 dB  
PL2 125.7701640 dB  
PL3 0 dB  
===== CHANNEL f2 =====  
CPDPRG2 waltz16  
INSTRUM 5 mm BBO-1H  
PULPROG zgpg30  
SOLVENT CDCl3  
NS 2  
DS 4  
SWH 10120.482 Hz  
AQ 0.00000000 sec  
RG 1.00000000 sec  
DE 1.00000000 sec  
TE 300.2 K  
D1 2.00000000 sec  
DELTA 1.00000000 sec  
TNO 1  
===== CHANNEL f3 =====  
NUC1 13C  
P1 7.40 usec  
PL1 0 dB  
PL2 125.7701640 dB  
PL3 0 dB  
===== CHANNEL f4 =====  
CPDPRG2 waltz16  
INSTRUM 5 mm BBO-1H  
PULPROG zgpg30  
SOLVENT CDCl3  
NS 2  
DS 4  
SWH 10120.482 Hz  
AQ 0.00000000 sec  
RG 1.00000000 sec  
DE 1.00000000 sec  
TE 300.2 K  
D1 2.00000000 sec  
DELTA 1.00000000 sec  
TNO 1  
===== CHANNEL f5 =====  
NUC1 13C  
P1 7.40 usec  
PL1 0 dB  
PL2 125.7701640 dB  
PL3 0 dB  
===== CHANNEL f6 =====  
CPDPRG2 waltz16  
INSTRUM 5 mm BBO-1H  
PULPROG zgpg30  
SOLVENT CDCl3  
NS 2  
DS 4  
SWH 10120.482 Hz  
AQ 0.00000000 sec  
RG 1.00000000 sec  
DE 1.00000000 sec  
TE 300.2 K  
D1 2.00000000 sec  
DELTA 1.00000000 sec  
TNO 1

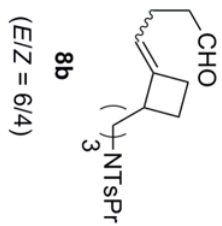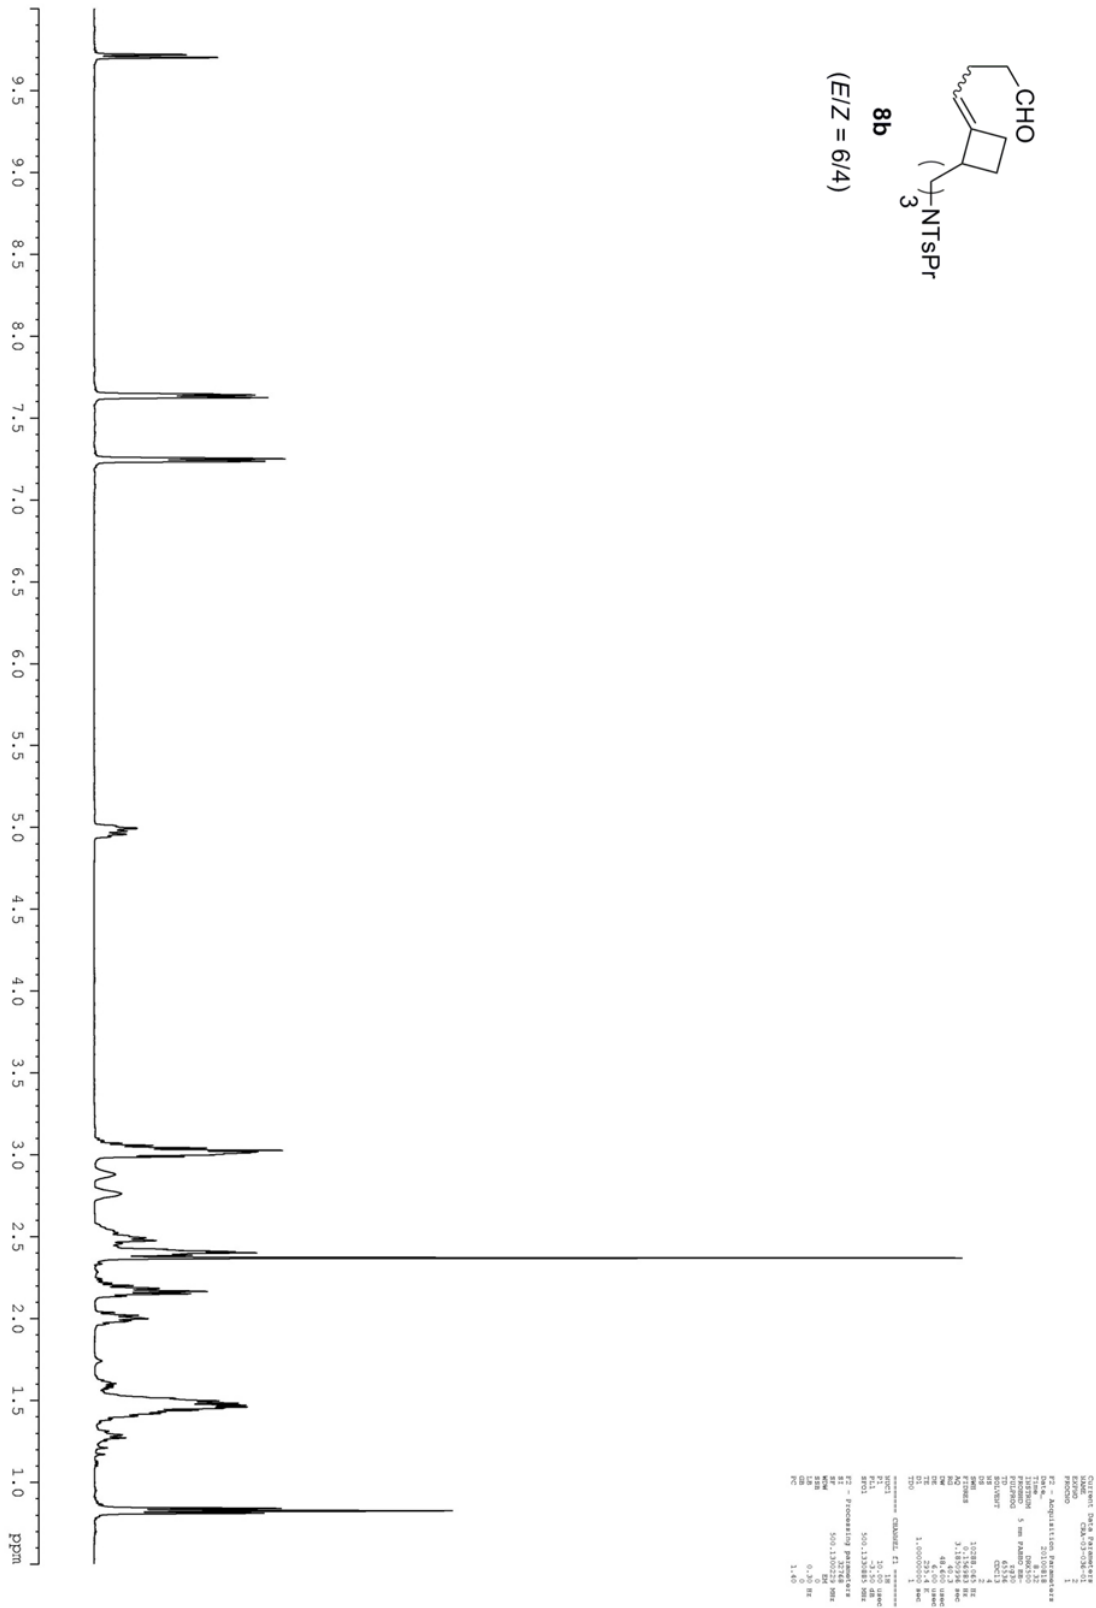

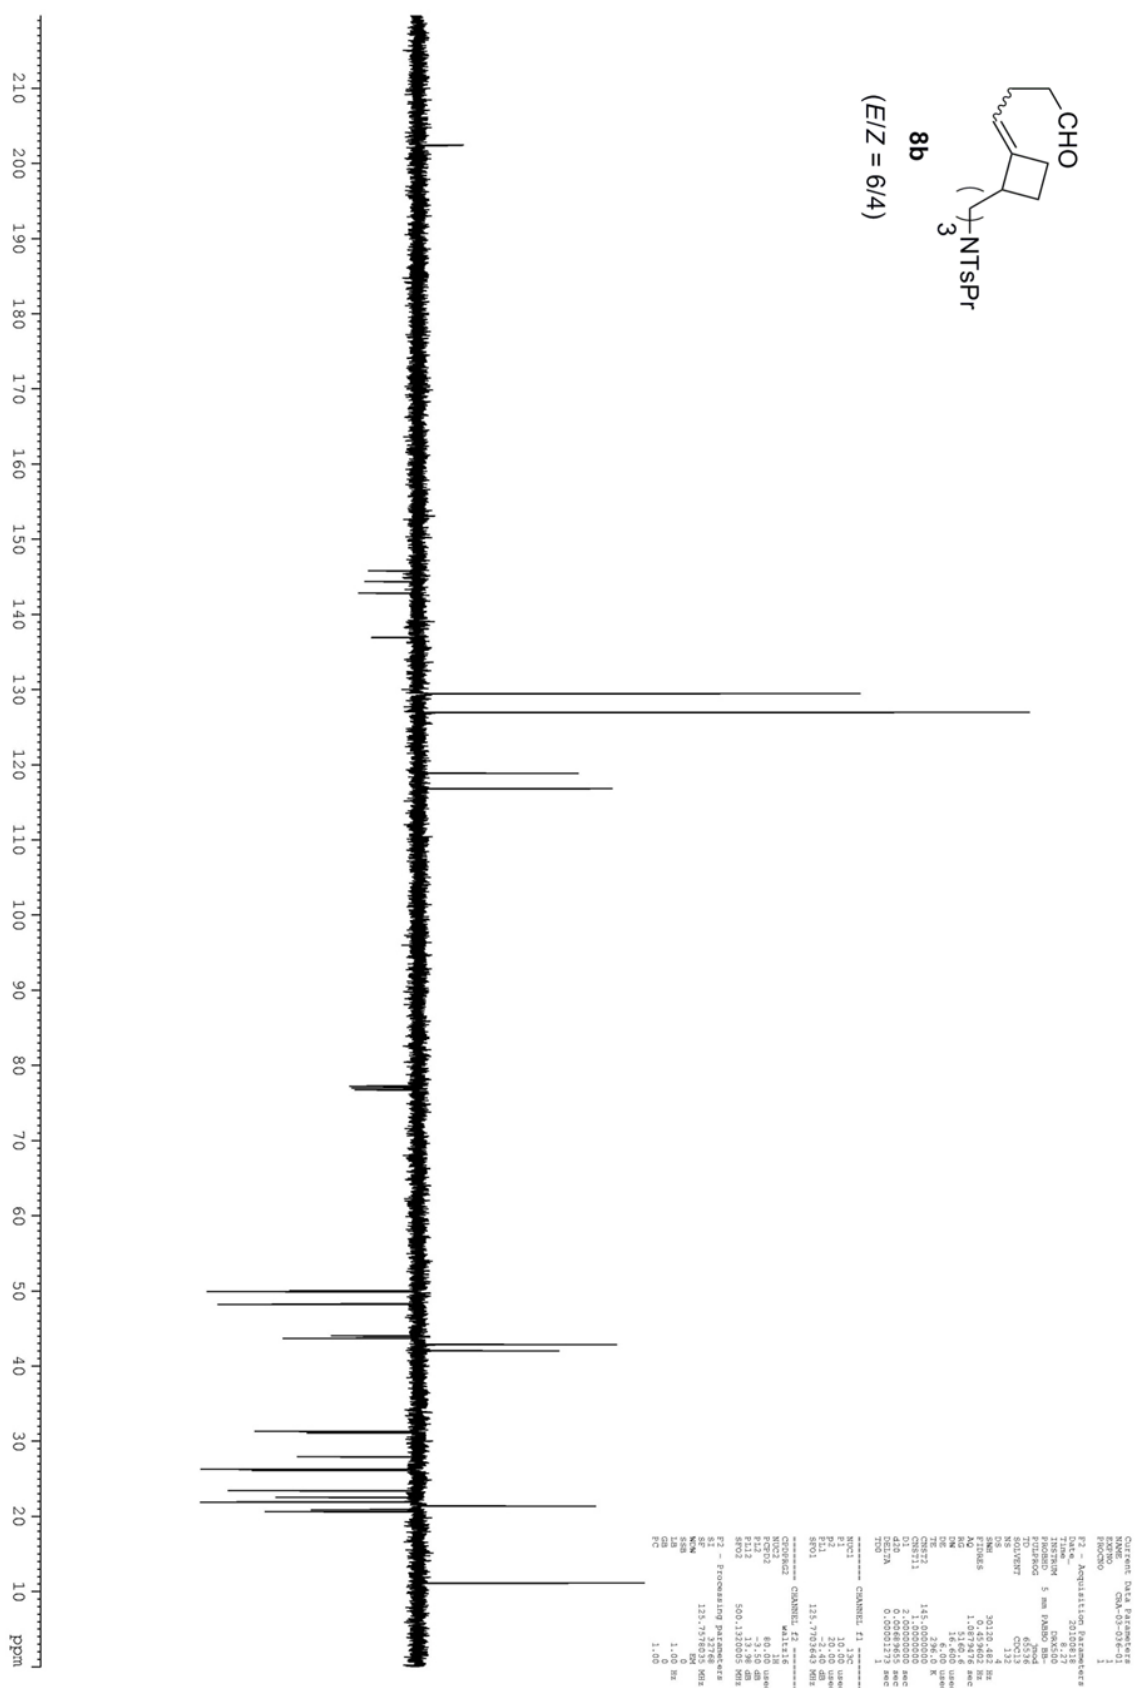

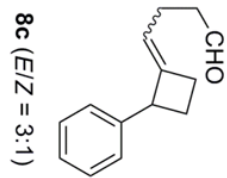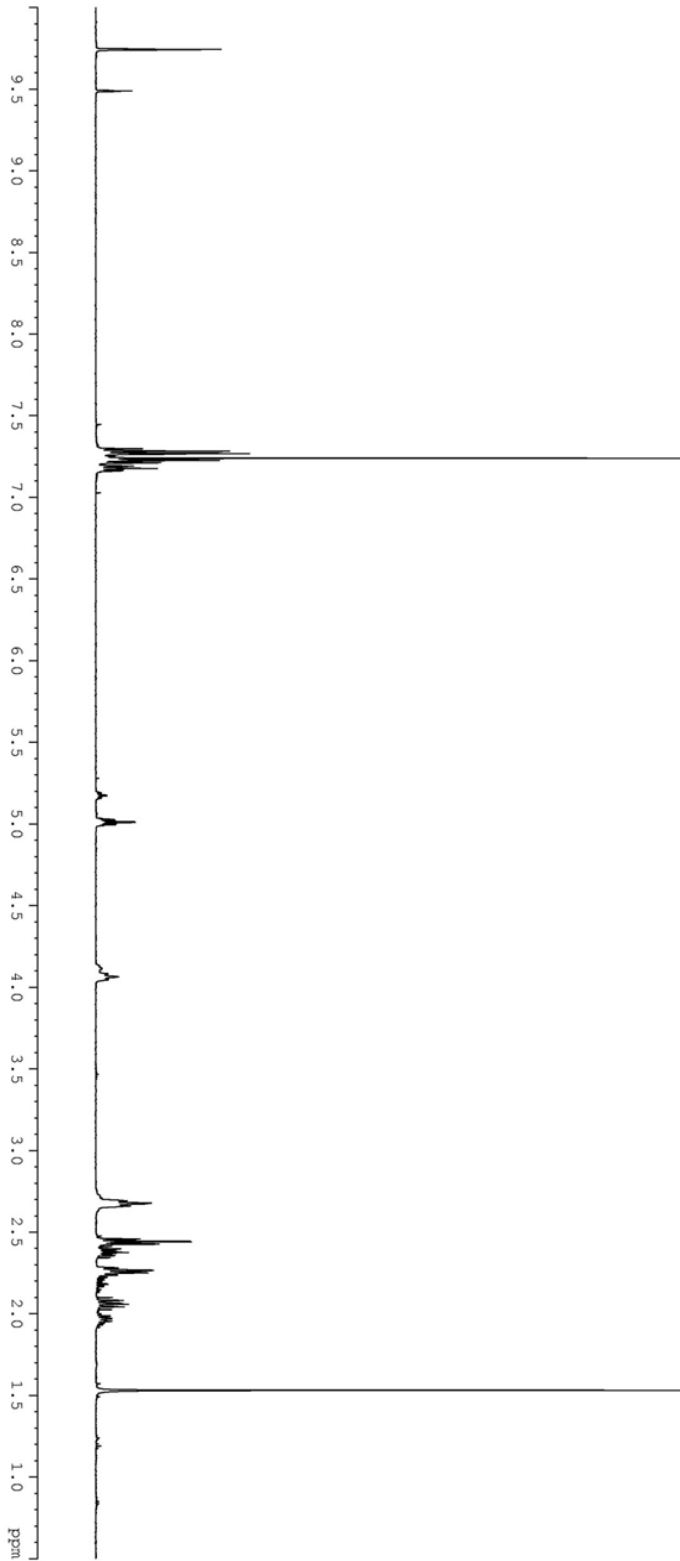

Current Data Parameters  
NAME 8c  
EXPNO 1  
PROCNO 1  
F2 - Acquisition Parameters  
Date\_ 2017-10-26  
Time 14.39  
INSTRUM spect  
PROBHD 5 mm PABBO-500  
PULPROG zgpg30  
TD 65536  
SOLVENT CDCl3  
NS 4  
DS 4  
SWH 10318.432 Hz  
FIDRES 0.164883 Hz  
AQ 0.0488112 sec  
RG 320  
SR 160.000 MHz  
F2 - Processing parameters  
SI 32768  
SF 500.1303229 MHz  
WDW EM  
SSB 0  
GB 0  
PC 1.00

**8c ( $E/Z = 3:1$ )**

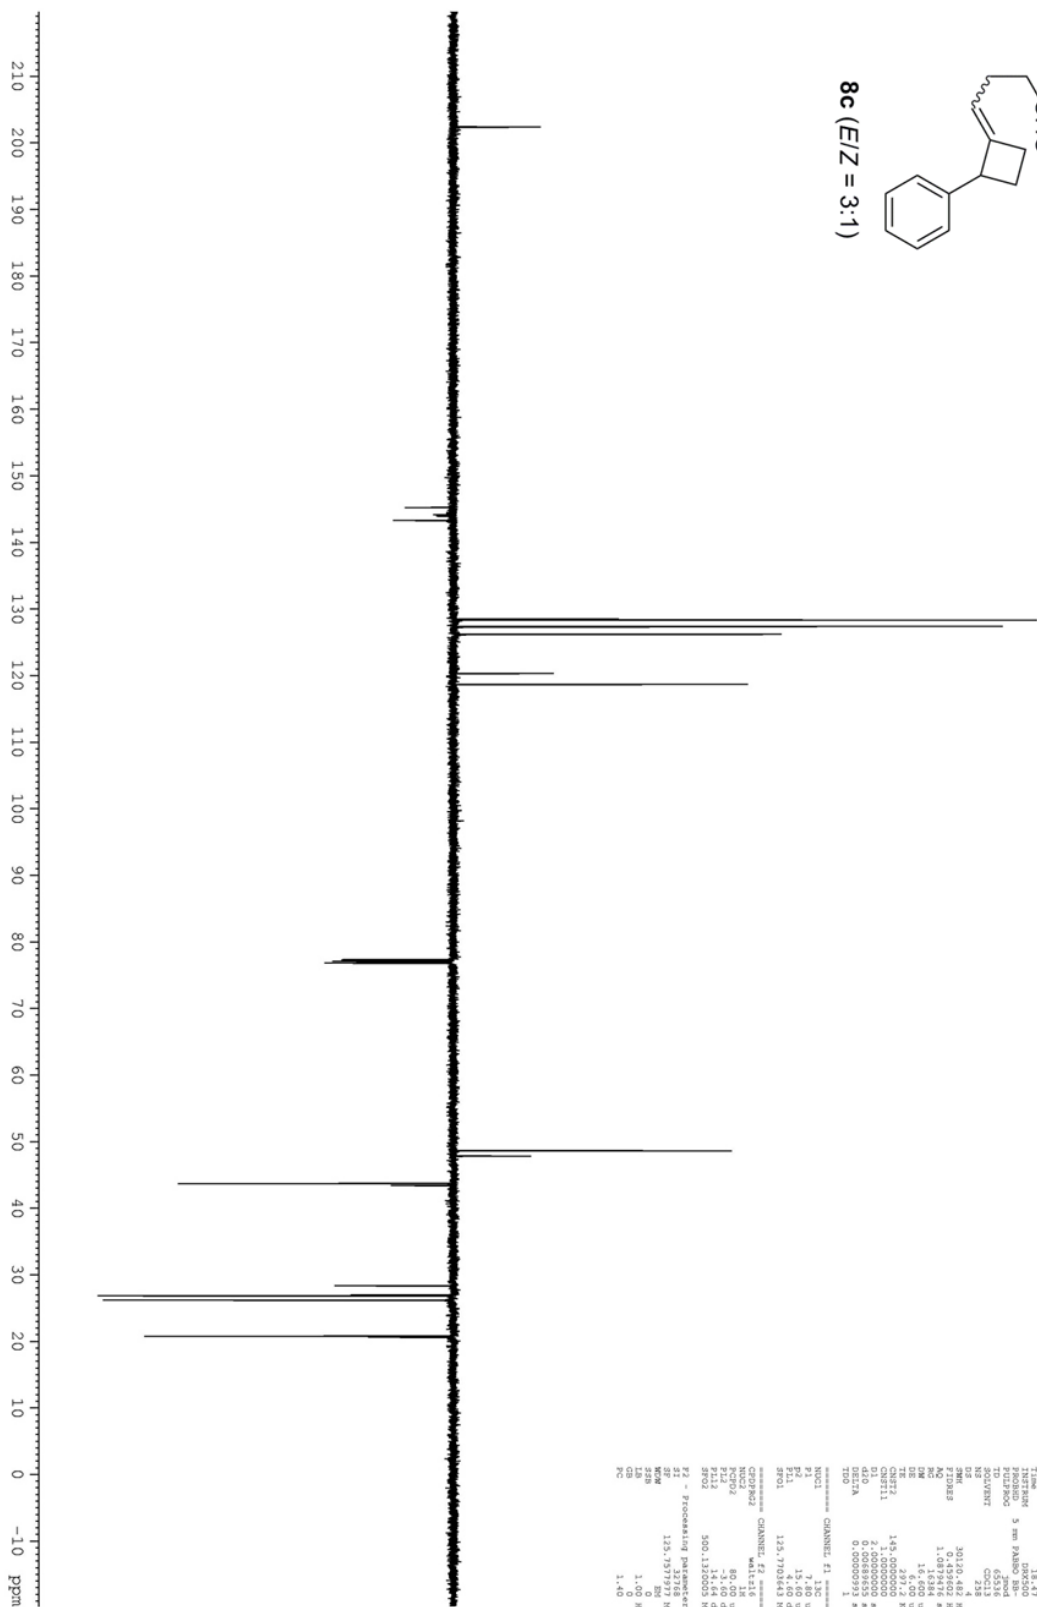[illegible]



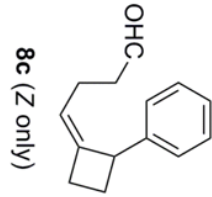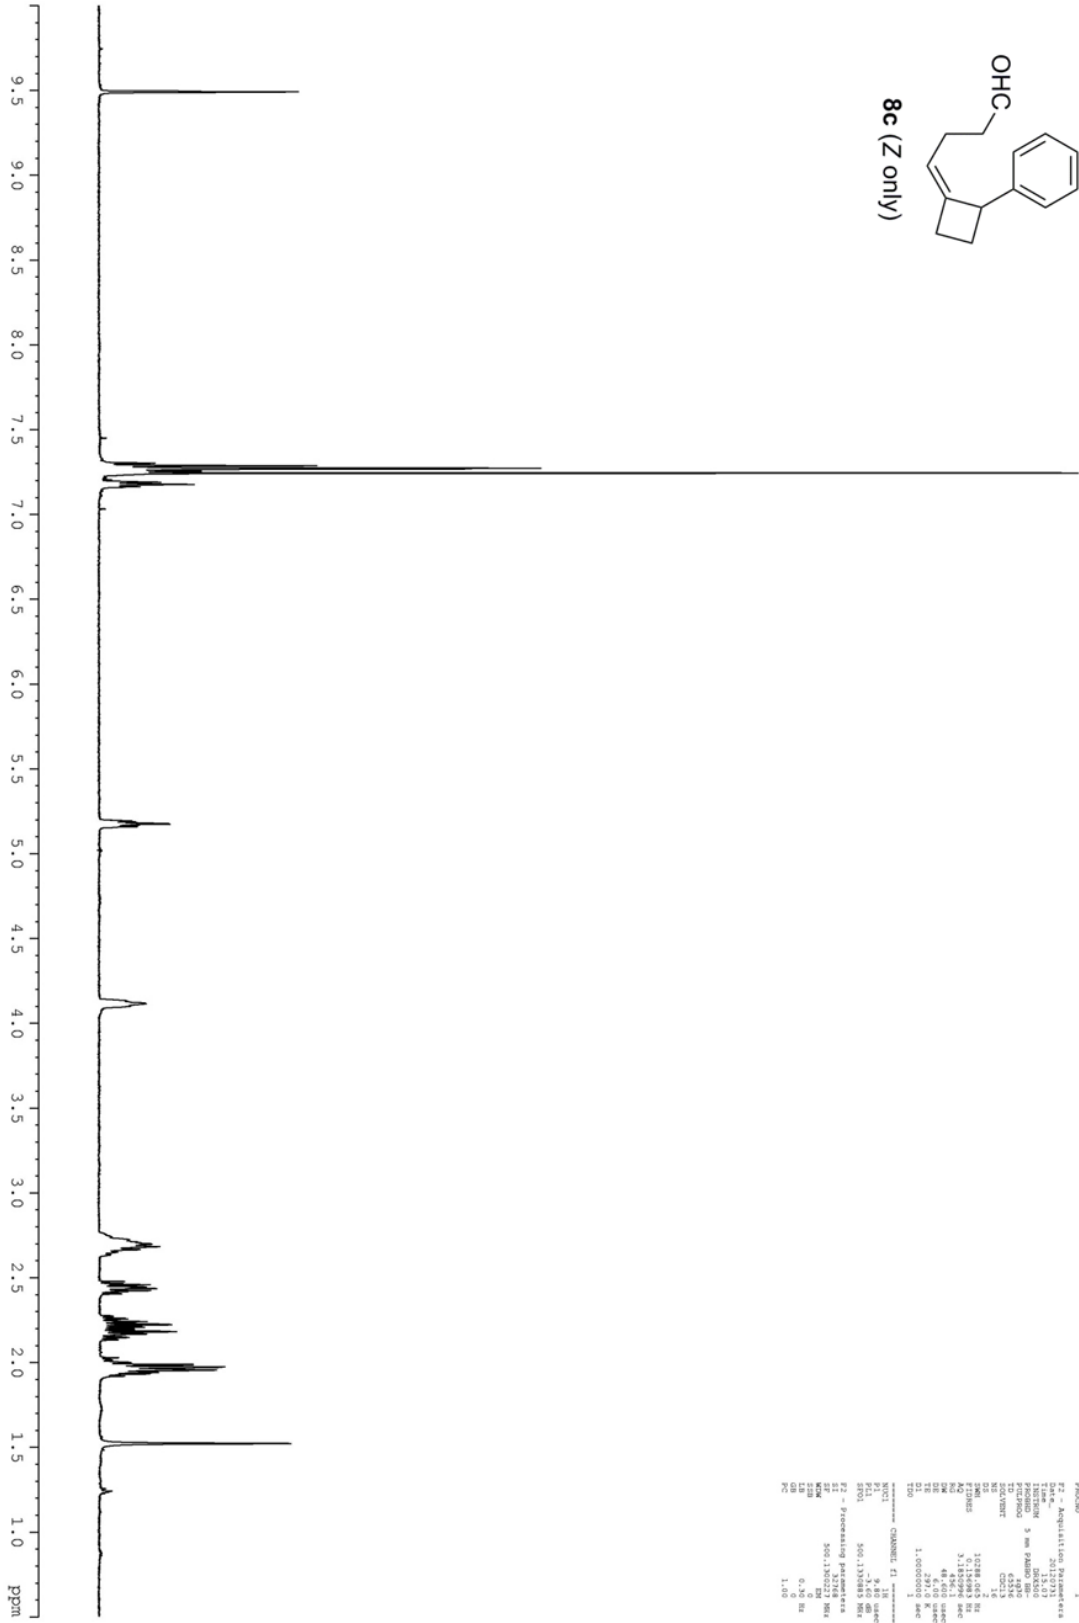

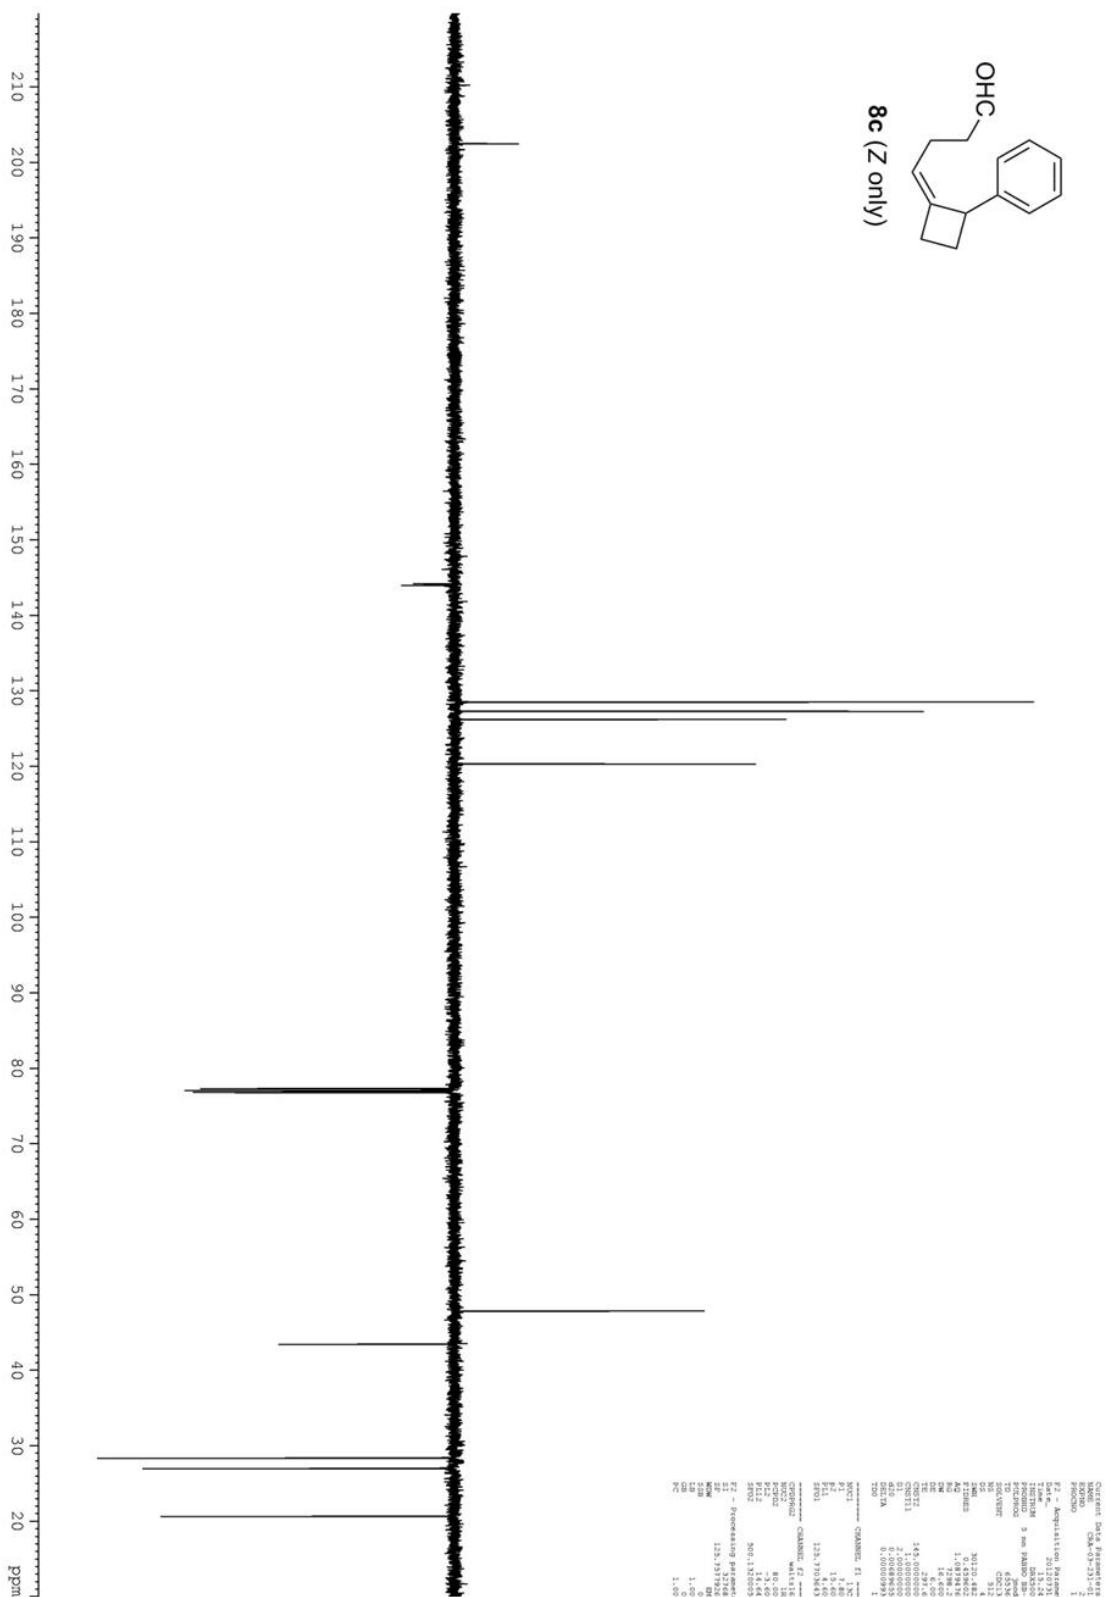

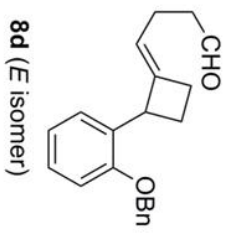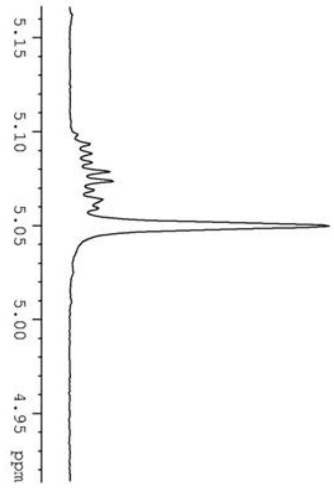

Current Data Parameters  
NAME: 8d  
EXPNO: 2  
PROCNO: 2  
F2 - Acquisition Parameters  
Date\_: 20091110  
Time: 10.00  
INSTRUM: spect  
PROBHD: 5 mm BBO  
PULPROG: zgpg30  
TD: 65536  
SOLVENT: CDCl3  
COC13  
DS: 2  
AQ: 10.084603 Hz  
FIDRES: 0.000131 Hz  
AQC: 3.1618994 sec  
AQE: 48.4500 Hz  
TE: 297.0 K  
TDS: 1.0000000 sec  
===== CHANNEL f1 =====  
NUC1: 1H  
P1: 12.00  
PL1: -1.00 dB  
PC1: 500.1318803 MHz  
F2 - Processing parameters  
SI: 32768  
SF: 500.1301212 MHz  
WDW: EM  
SSB: 0  
GB: 0.2 Hz  
PC: 1.00

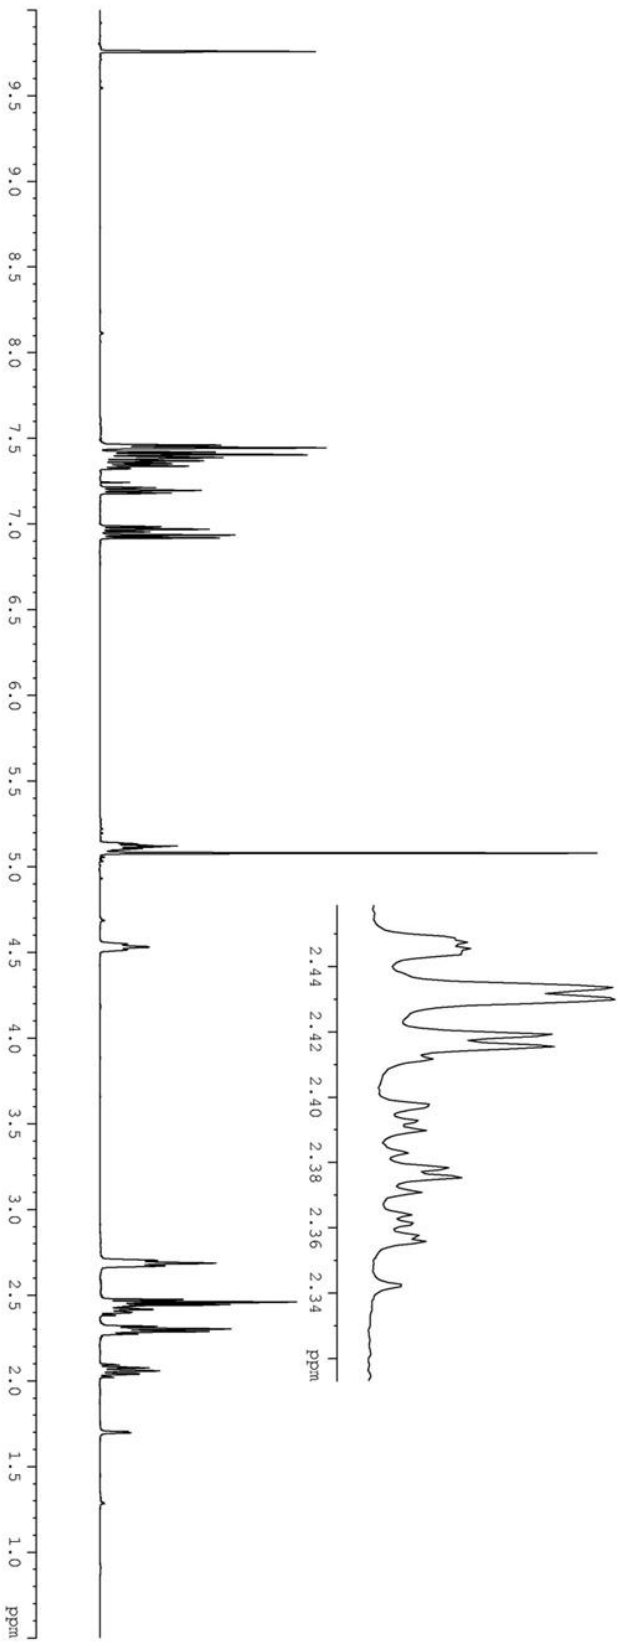

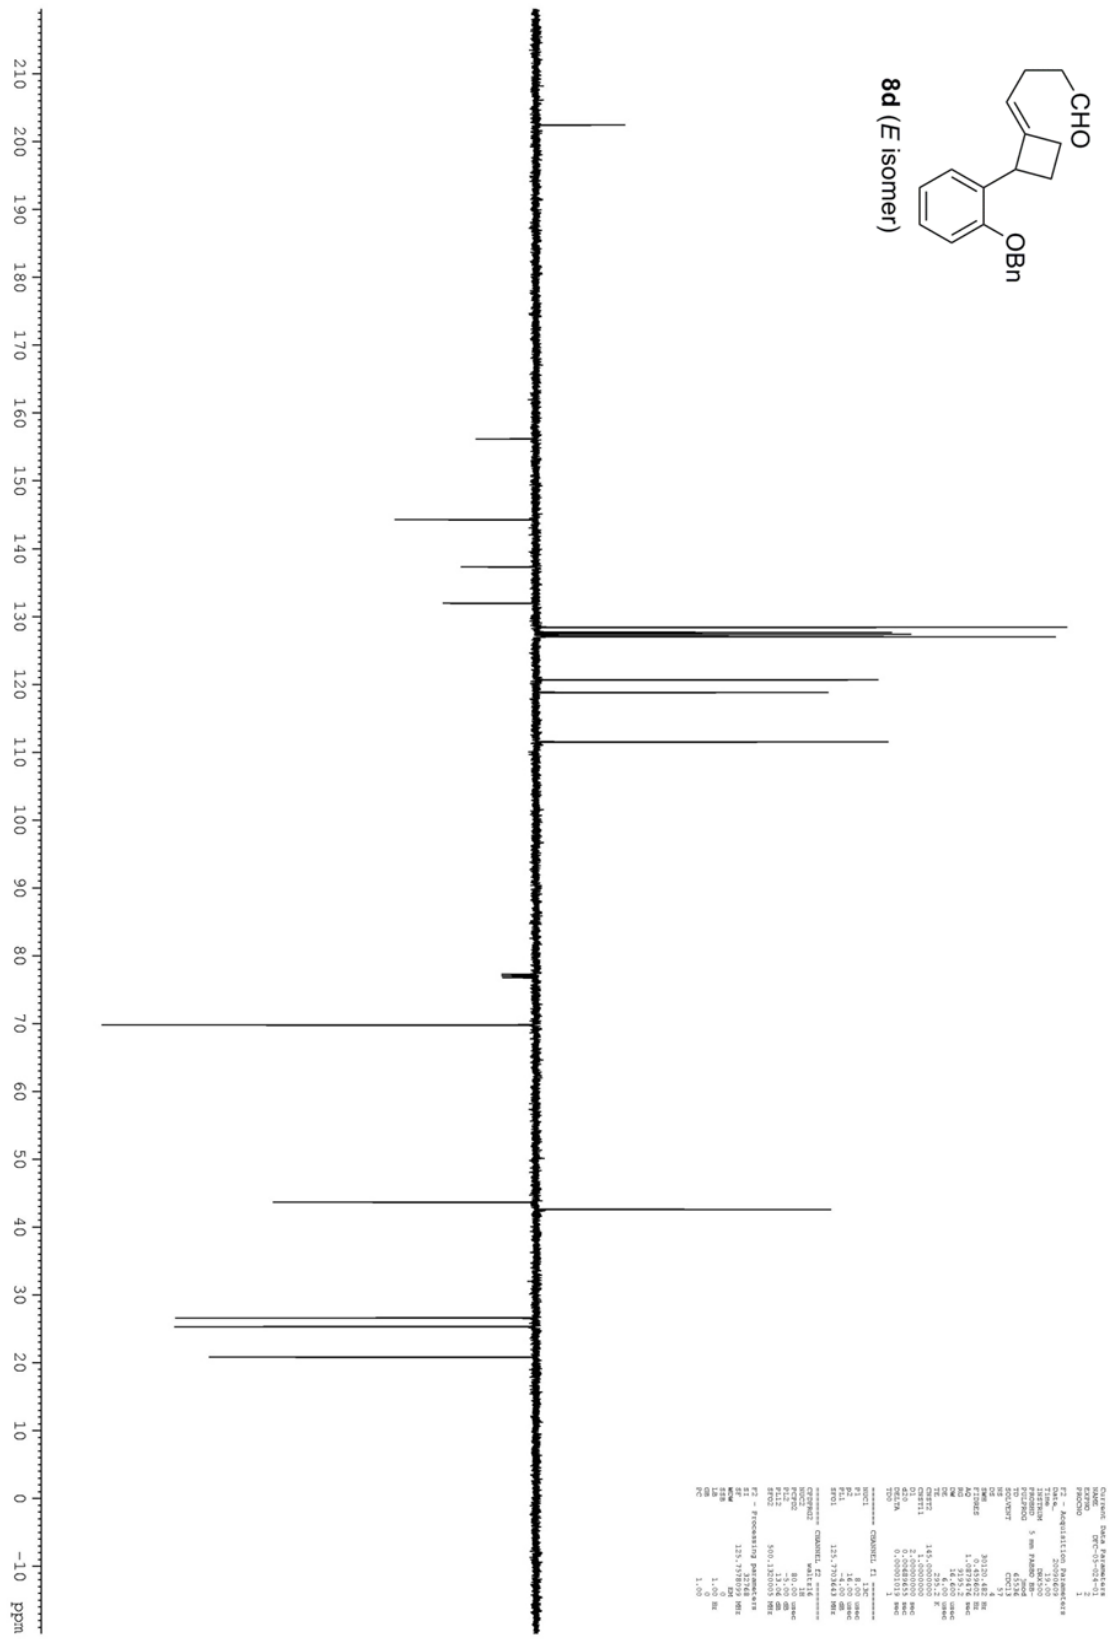

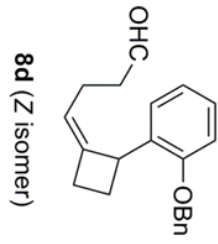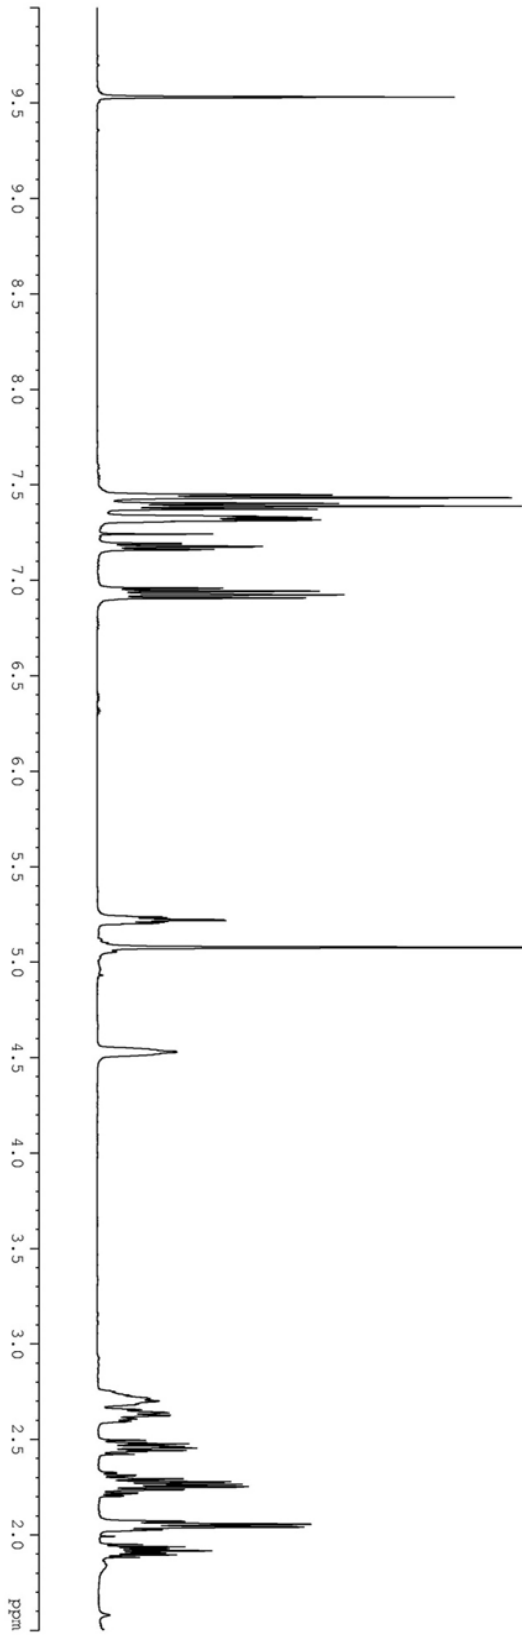

Current Data Parameters  
NAME 8d-18-116-01  
EXPNO 1  
PROCNO 1  
F2 - Acquisition Parameters  
Date\_ 20180613  
Time 16.28  
INSTRUM spect  
PROBHD 5 mm PABBO BB-  
PULPROG zgpg30  
TD 65536  
SFO 400.136  
AQ 1.00  
RG 327.50  
SD 1.0  
SOLVENT CDCl3  
NS 1024  
DS 4  
SWH 10288.605 Hz  
FIDRES 0.000300 Hz  
AQ 3.1880094 sec  
RG 68.600 sec  
TE 297.2 K  
DE 1.0000000 sec  
DQ 1.0000000 sec  
===== CHANNEL f1 =====  
NUC1 13C  
P1 9.18 usec  
PL1 0.00 dB  
SFO 100.626150 MHz  
F2 - Processing parameters  
SI 32768  
SF 400.136092 MHz  
WDW 500.00000 Hz  
SSB 0.00 Hz  
LB 1.00 Hz  
GB 0.00 Hz  
PC 1.00

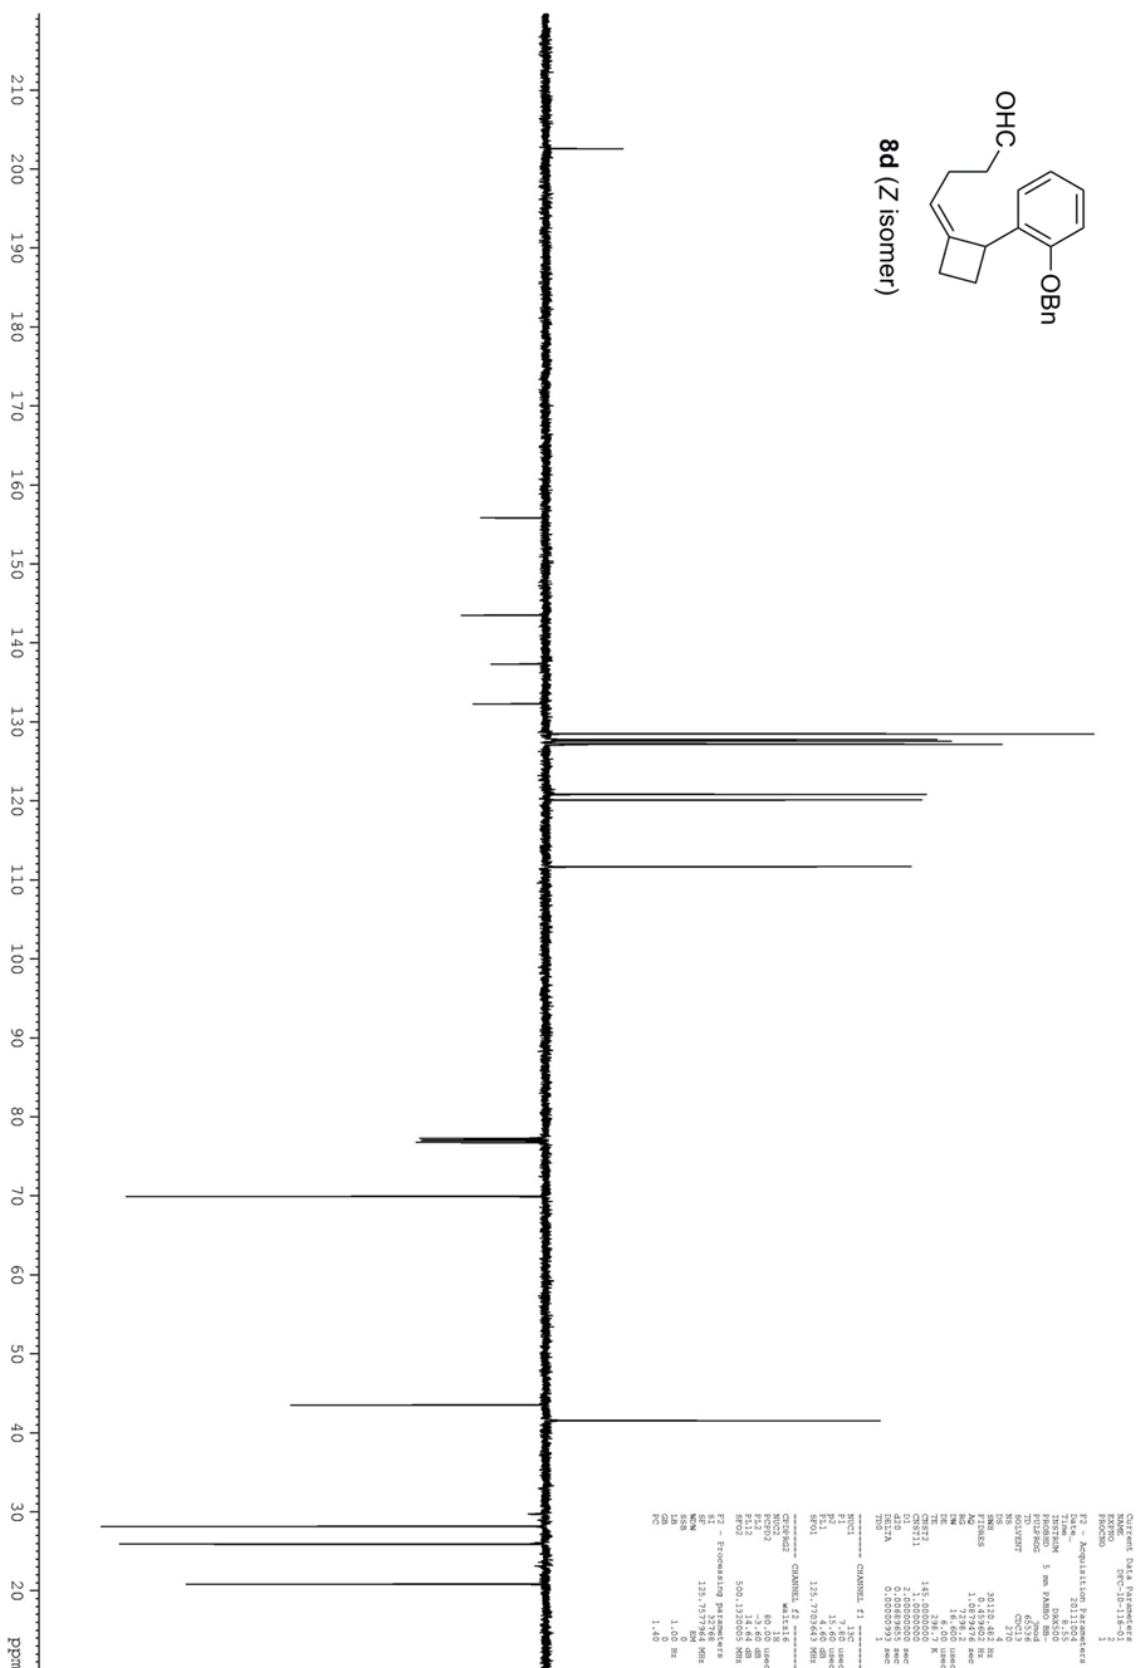

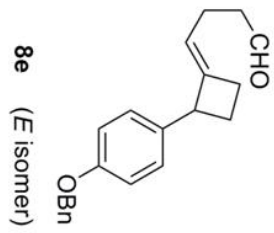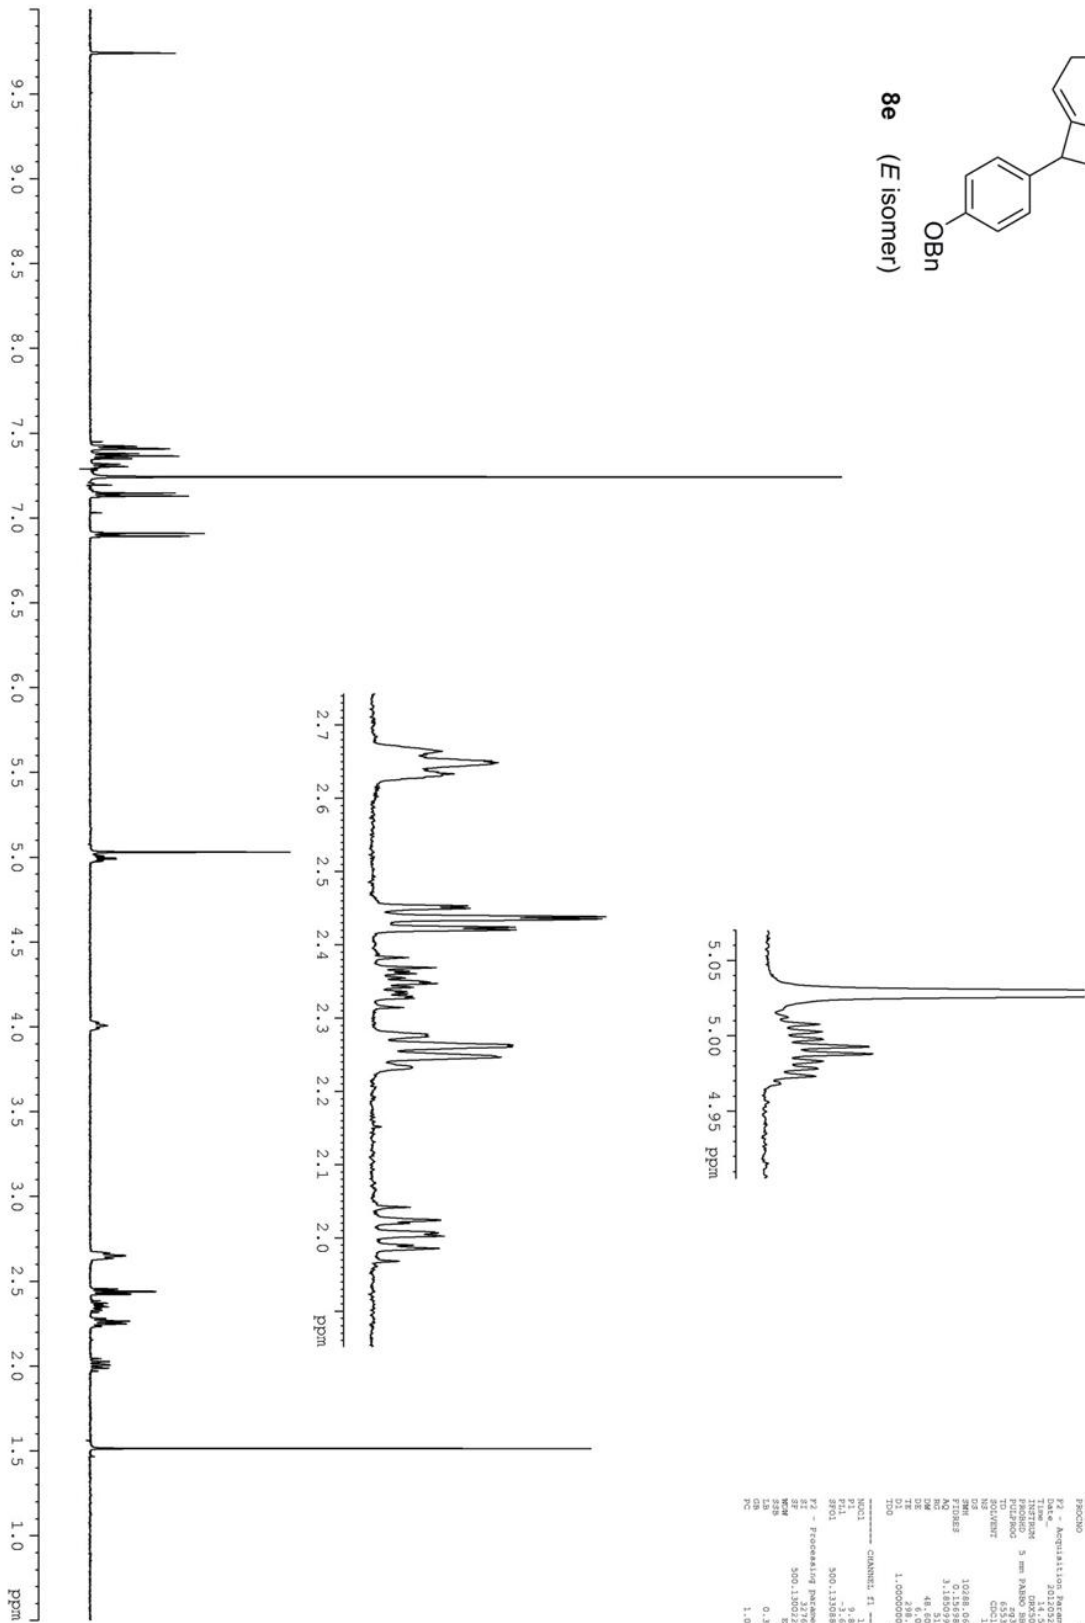

Source: Data Processing  
NAME: CMA-01-181-01  
EXPNO: 1  
PROCNO: 1  
Date\_ Time: 20120324  
F2 - Acquisition Parameters  
Date\_ Time: 20120324  
INSTRUM: spect  
PROBHD: 5 mm PABBO BB-1  
PULPROG: zgpg30  
TD: 65536  
SOLVENT: CHCl<sub>3</sub>  
NS: 2048  
DS: 4  
SWH: 10184.2 Hz  
FIDRES: 0.161983 Hz  
AQ: 3.1850192 sec  
RG: 48.000 usec  
TE: 298.2 K  
DE: 1.00000000 sec  
F2 - Processing parameters  
Date\_ Time: 20120324  
INSTRUM: spect  
PROBHD: 5 mm PABBO BB-1  
PULPROG: zgpg30  
TD: 65536  
SOLVENT: CHCl<sub>3</sub>  
NS: 2048  
DS: 4  
SWH: 10184.2 Hz  
FIDRES: 0.161983 Hz  
AQ: 3.1850192 sec  
RG: 48.000 usec  
TE: 298.2 K  
DE: 1.00000000 sec

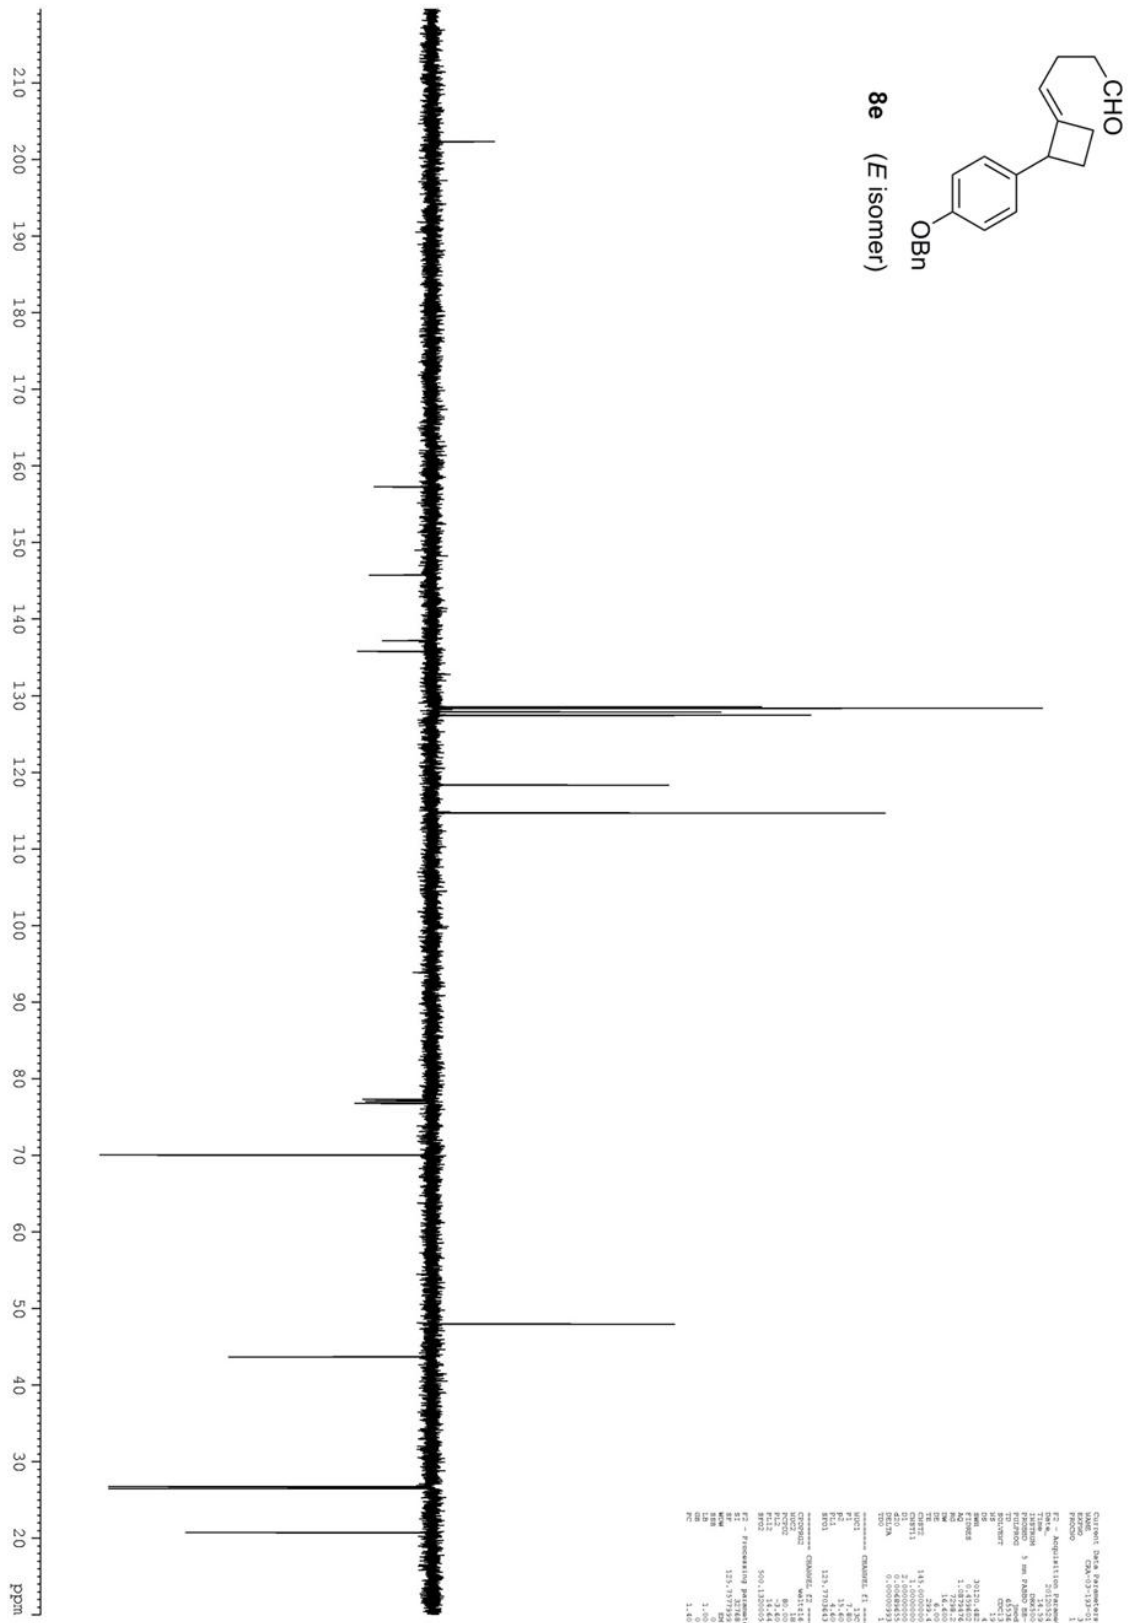



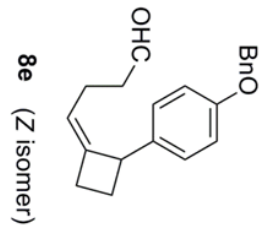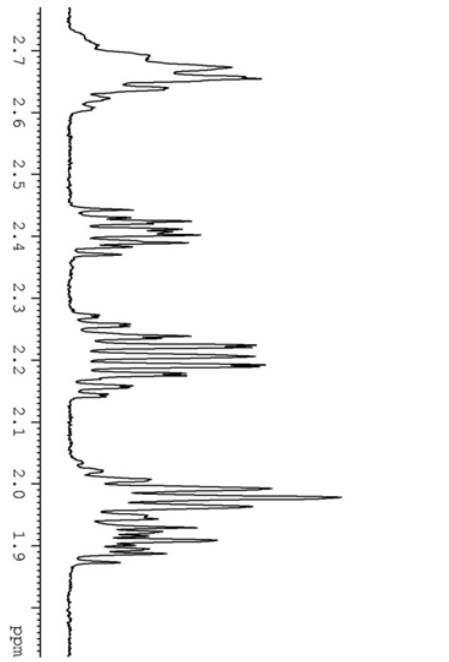

NAME: 8e  
EXPNO: 1  
PROCNO: 1  
F2 - Acquisition Parameters  
Date\_ 20120124  
Time 12.12  
INSTRUM spect  
PROBHD 5 mm BBO-400  
PULPROG zgpg30  
PCPDPRG2 gpcg13  
SOLVENT CDCl<sub>3</sub>  
DS 2  
SS 127.06 400.13  
F2 - Processing parameters  
SI 32768  
SF 400.1300227 MHz  
AQ 4.6500000 sec  
RG 327.5  
IN 1.0000000 sec  
F2 - Processing parameters  
SI 32768  
SF 400.1300227 MHz  
AQ 4.6500000 sec  
RG 327.5  
IN 1.0000000 sec  
PC 1.40

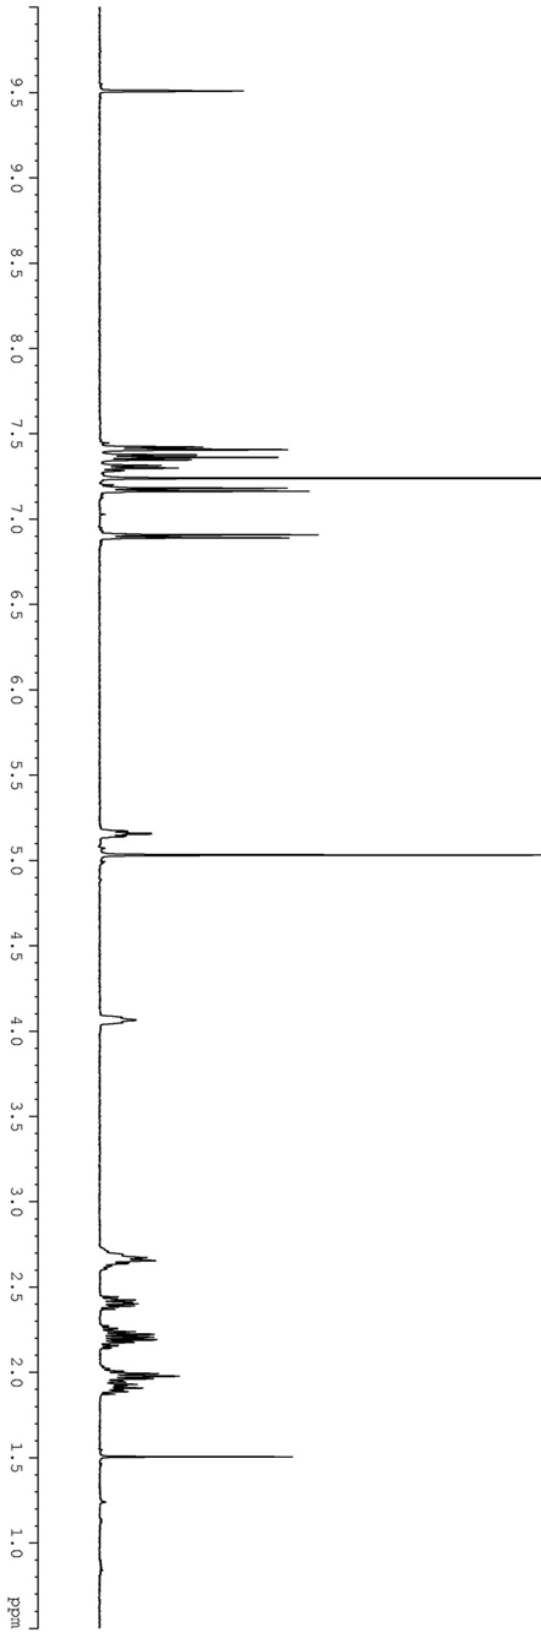

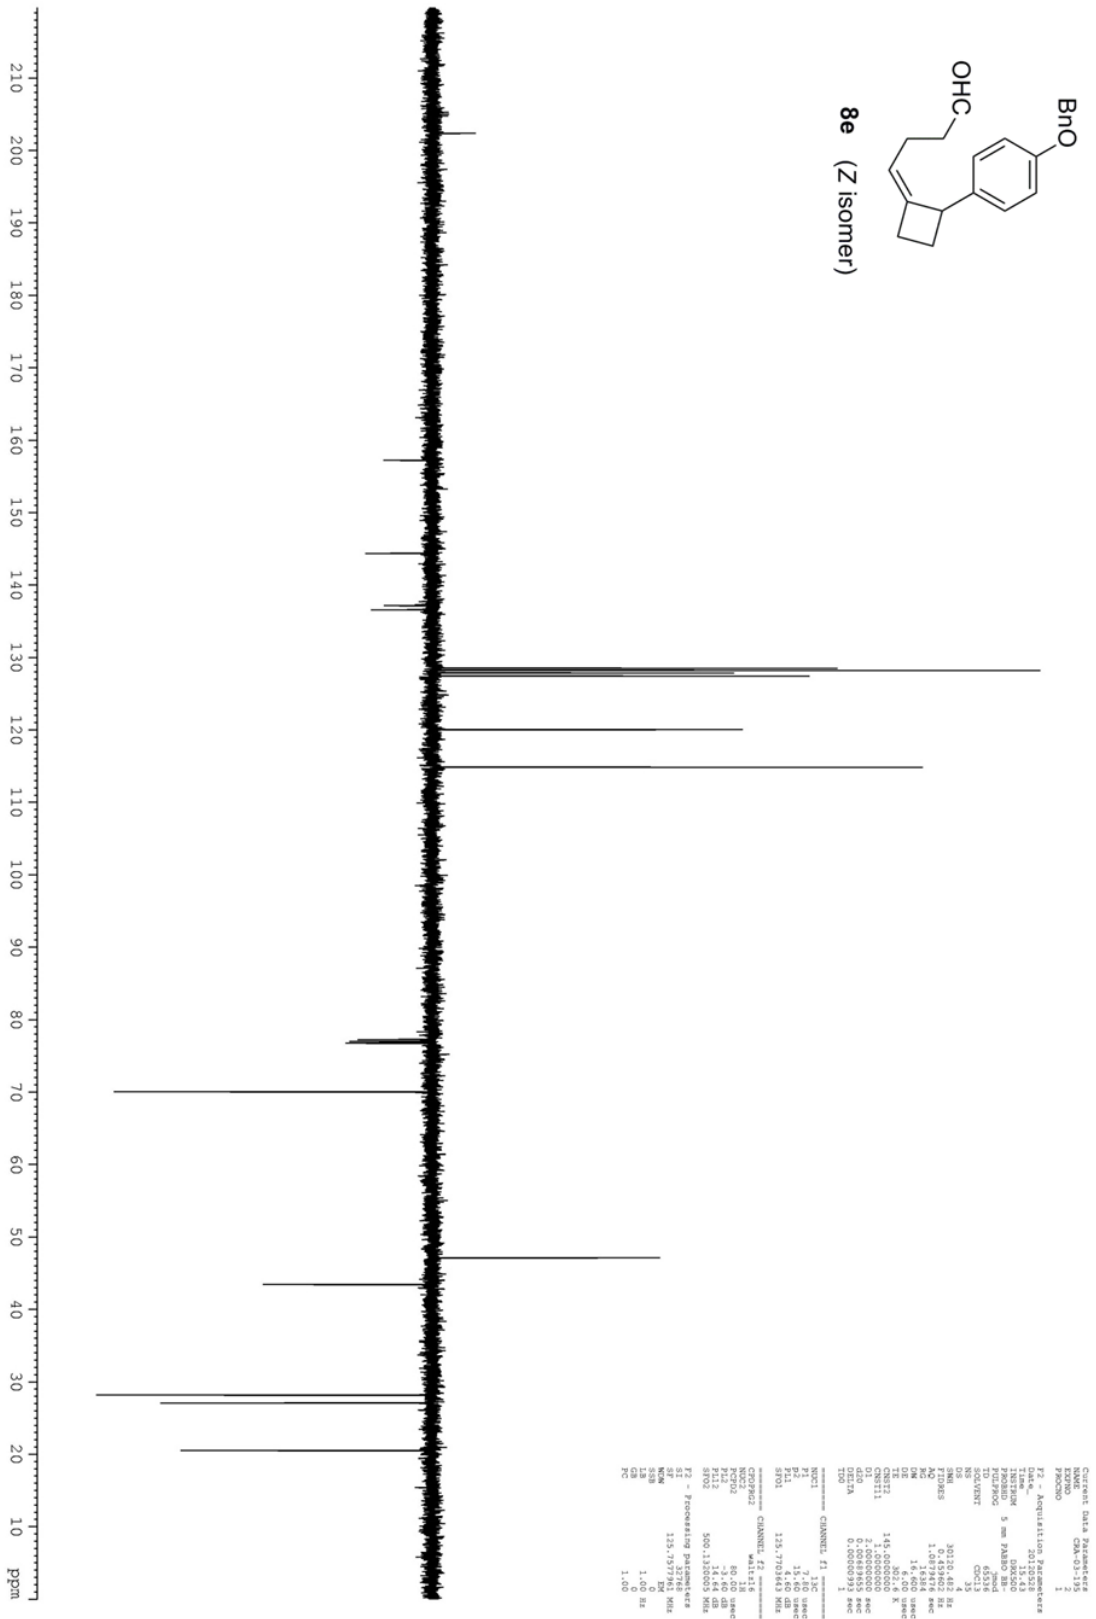

**8f** (*E/Z* = 30:1)

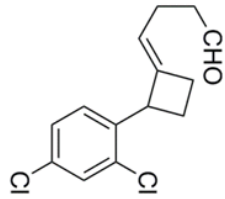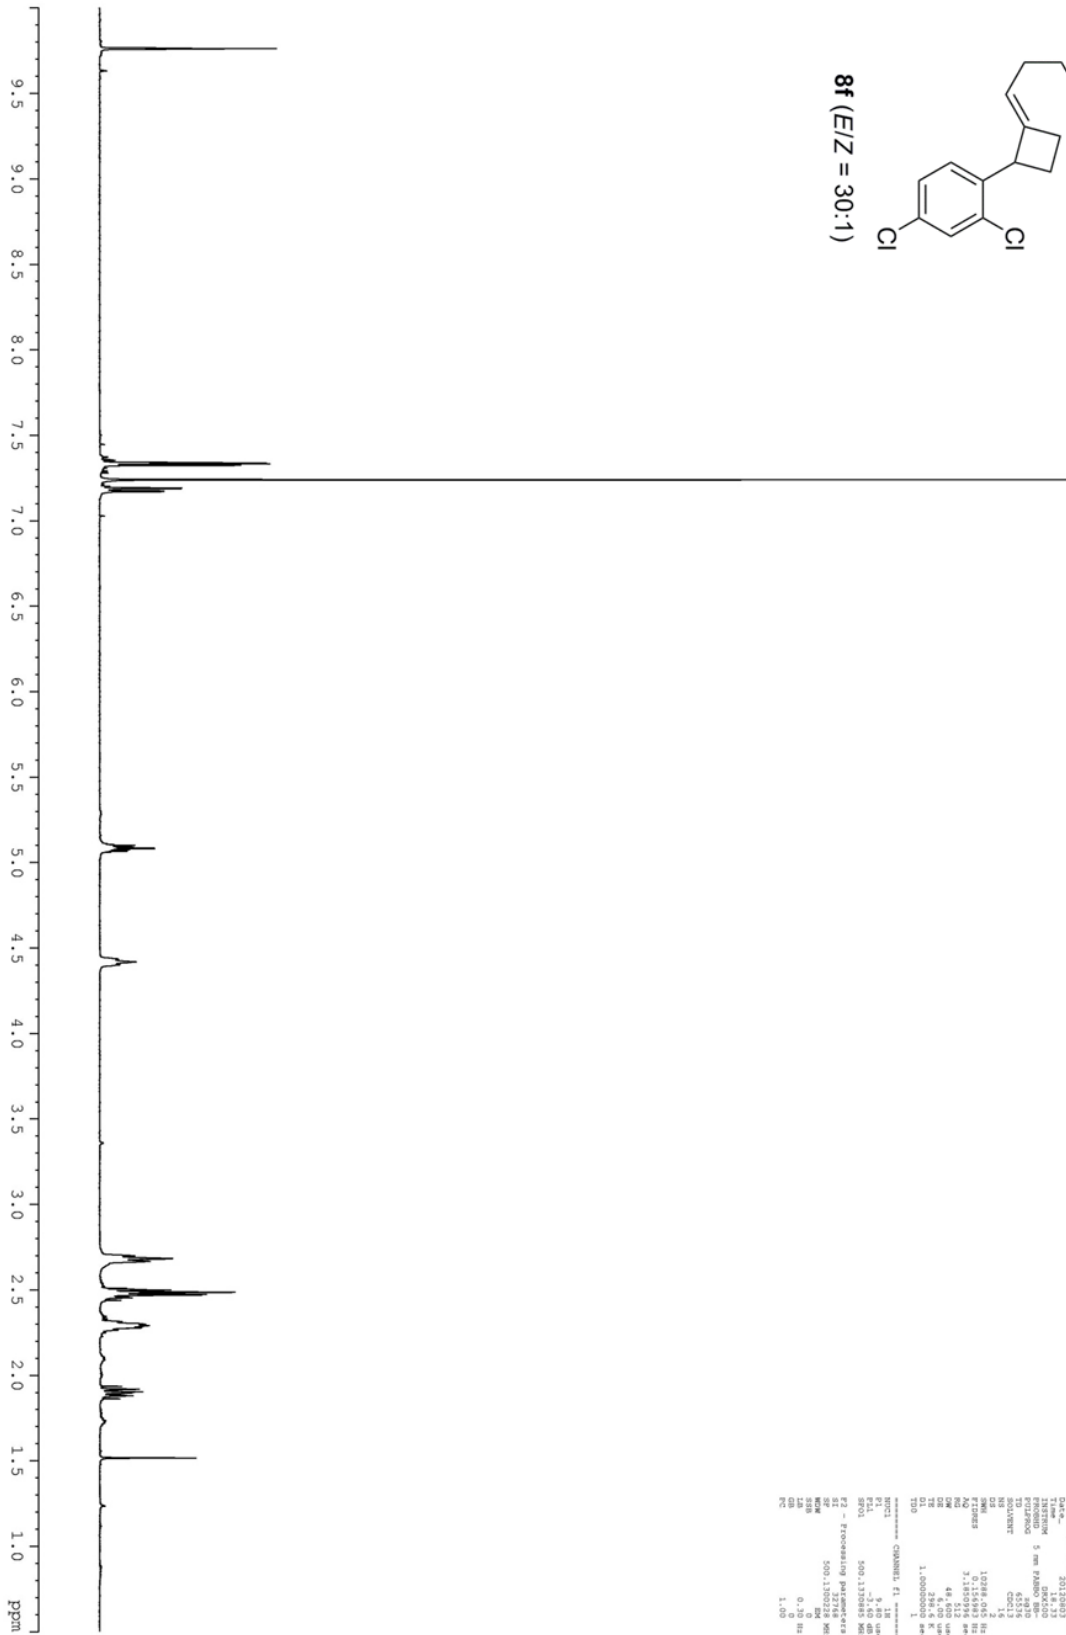

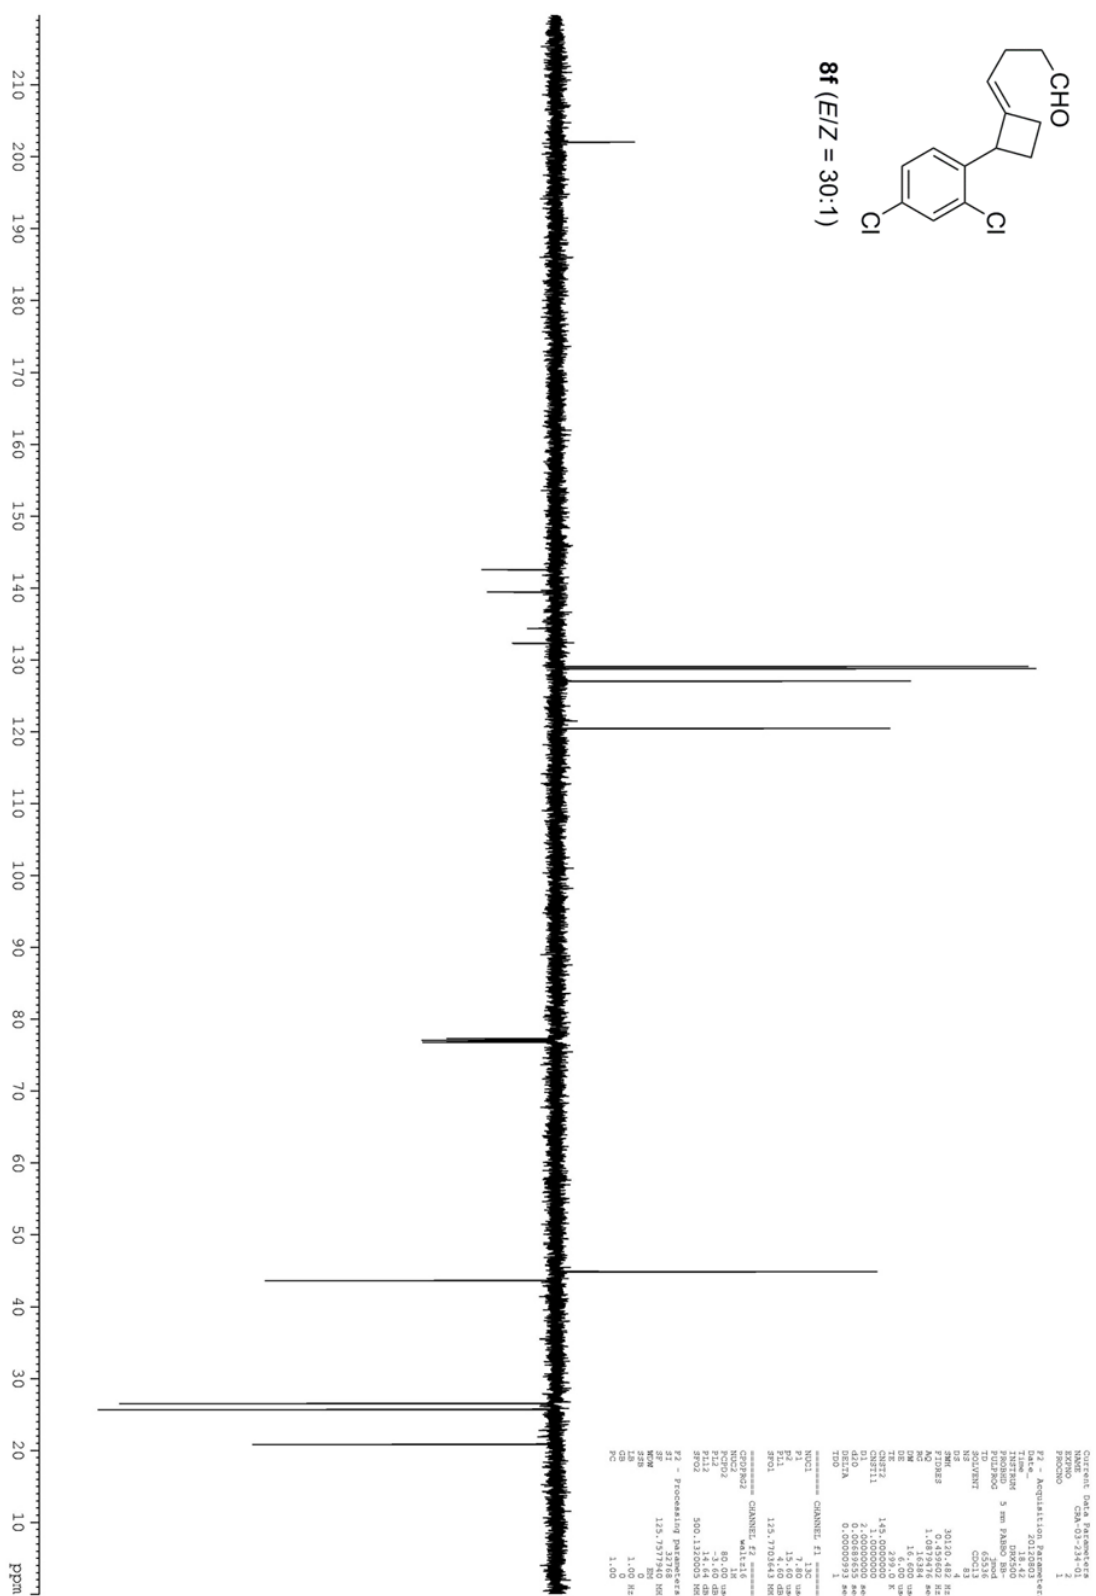

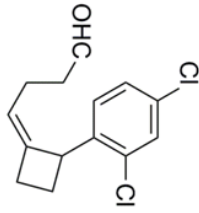

**8f** (*E:Z* = 2:98)

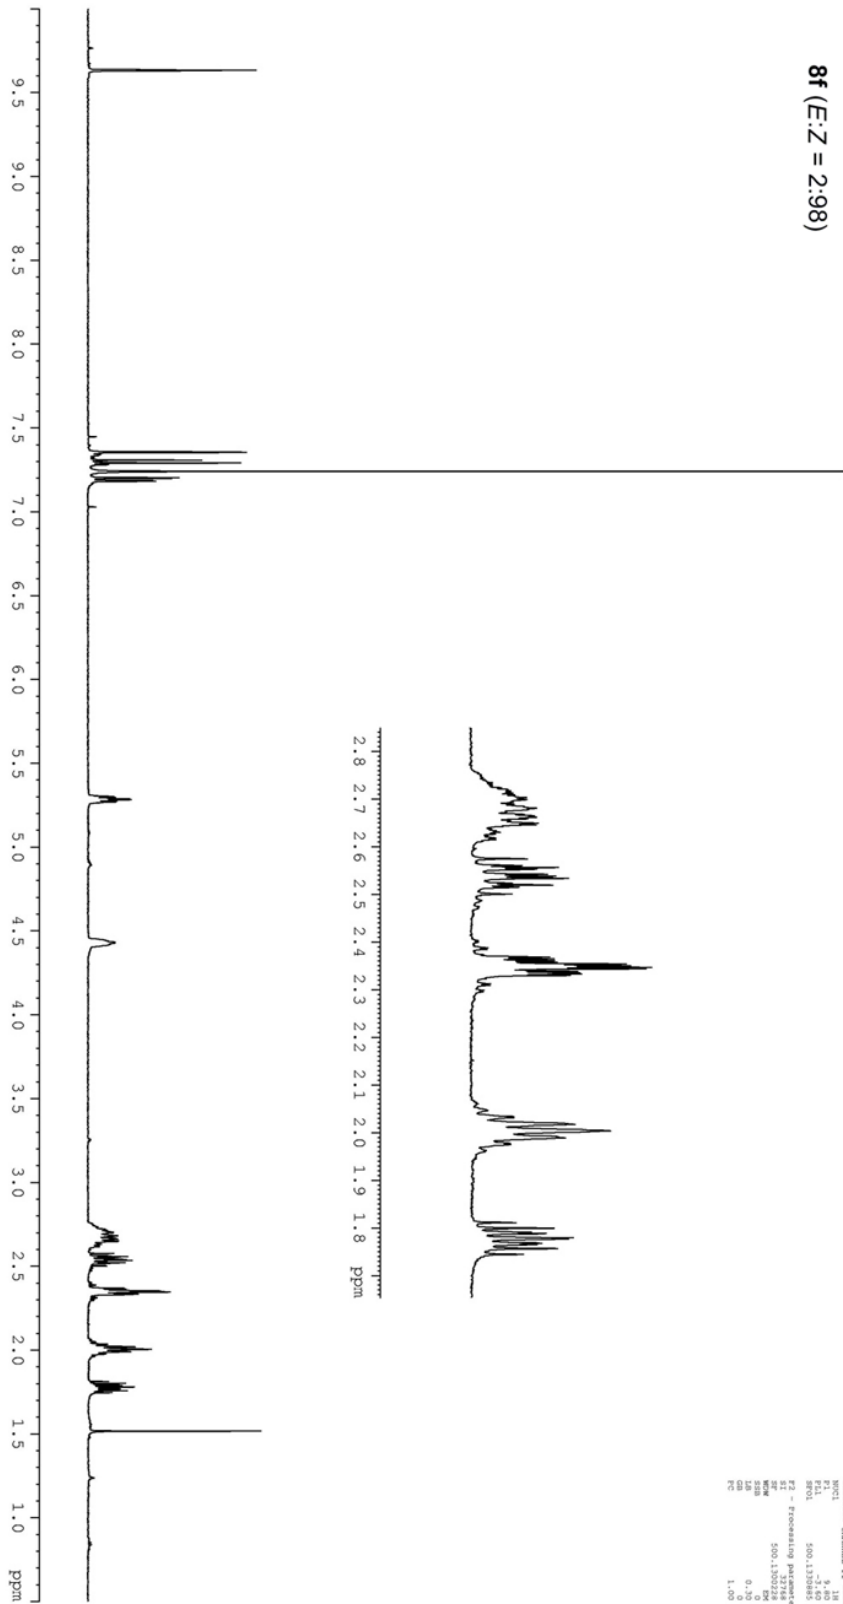

Current Data Parameters  
NAME 8f-01-218-01  
EXPNO 1  
PROCNO 1  
F2 - Acquisition Parameters  
Date\_ 2017.05  
Time 17.05  
INSTRUM spect  
PROBHD 5 mm EXBBO 500  
PULPROG zgpg30  
TD 65536  
SOLVENT CDCl3  
NS 14  
DS 1  
SW 10288.42 Hz  
FIDRES 0.154993 Hz  
AQ 0.164661 sec  
RG 4096  
DM 64.000 umbar  
DE 1.000000 K  
TE 300.2 K  
D1 1.000000 sec  
T20 1  
===== CHANNEL f1 =====  
NUC1 13C  
P1 14.000000 sec  
PL1 0.00  
SFO1 500.130050 MHz  
===== CHANNEL f2 =====  
F2 - Processing parameters  
SI 32768  
SF 500.130050 MHz  
WDW EM  
SSB 0  
LB 0.30 Hz  
GB 0  
PC 1.00

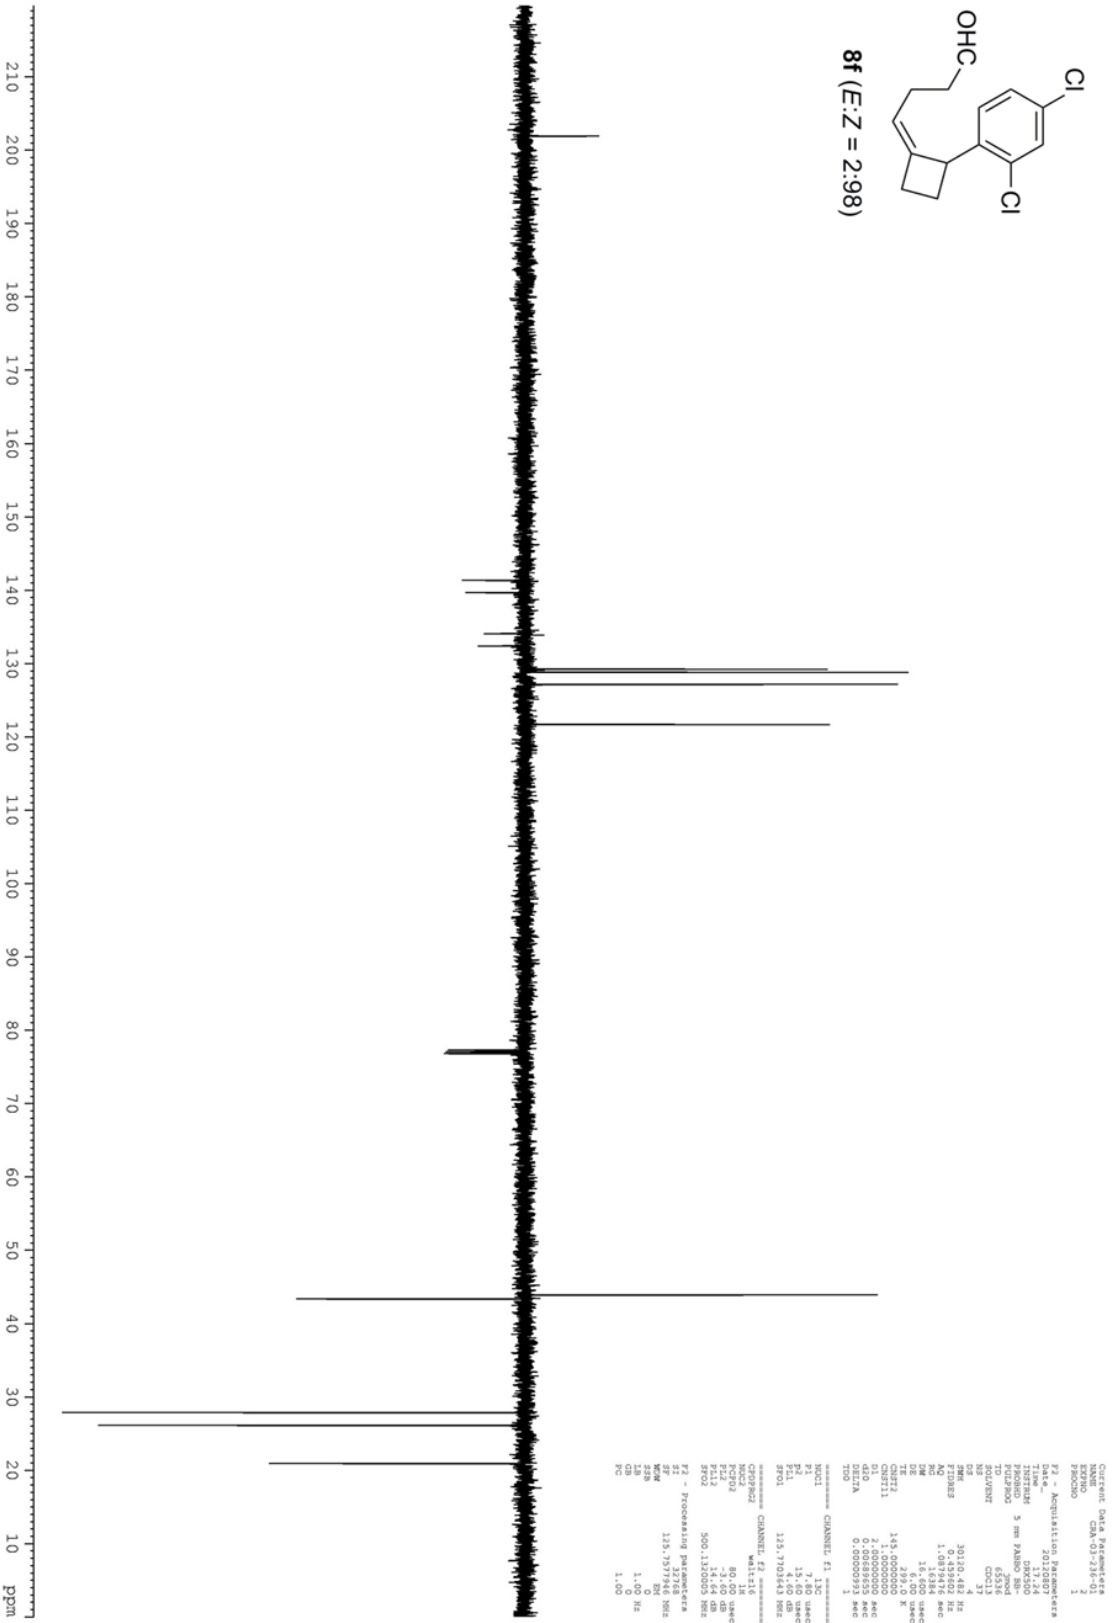

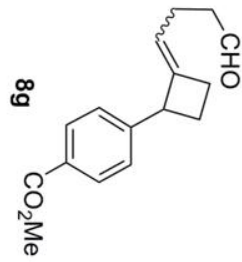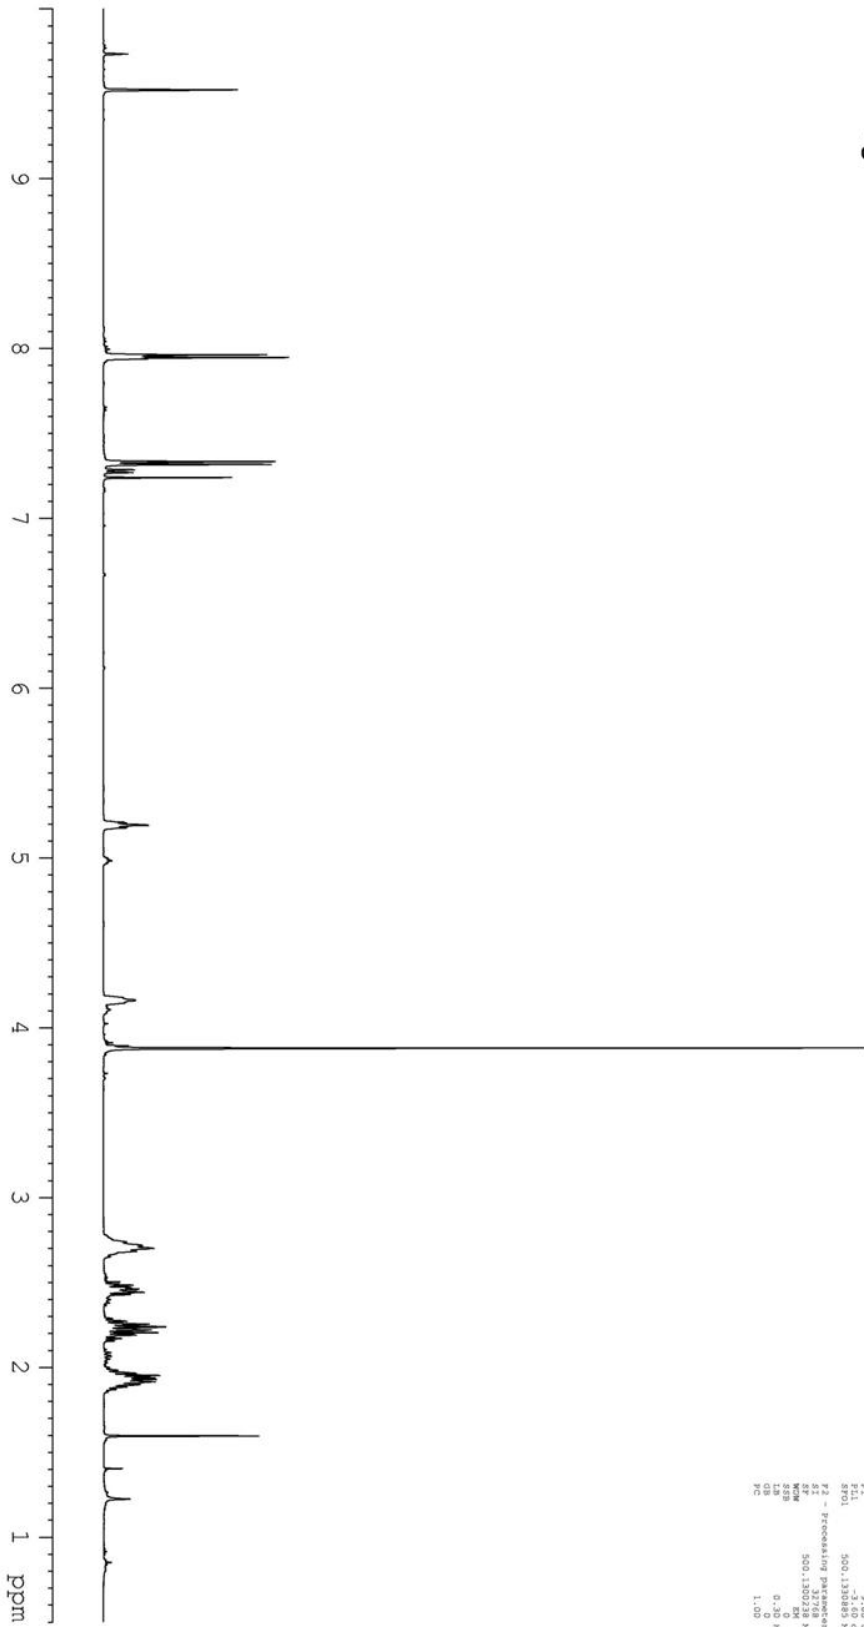

Current Data Parameters  
NAME: DUT-04-69-01  
EXPNO: 1  
PROCNO: 1  
F2 - Acquisition Parameters  
Date\_: 20121103  
Time: 12.00  
INSTRUM: spect  
PROBHD: 5 mm PABBO 1H-  
PULPROG: zgpg30  
TD: 65536  
SOLVENT: CDCl3  
NS: 512  
DS: 2  
SWH: 10189.42 Hz  
FIDRES: 0.156483 Hz  
AQ: 3.1859392 sec  
RG: 327.68  
DM: 48.400 usec  
DE: 232.0 usec  
TE: 300.2 K  
D1: 1.00000000 sec  
SFO: 500.130249 MHz  
NUC1: 1H  
P1: 9.80 usec  
PL1: 0 dB  
SFO1: 500.130249 MHz  
F2 - Processing parameters  
SI: 32768  
SF: 500.130249 MHz  
WDW: EM  
SSB: 0 Hz  
GB: 0  
PC: 1.00

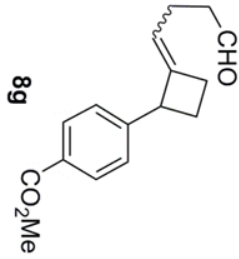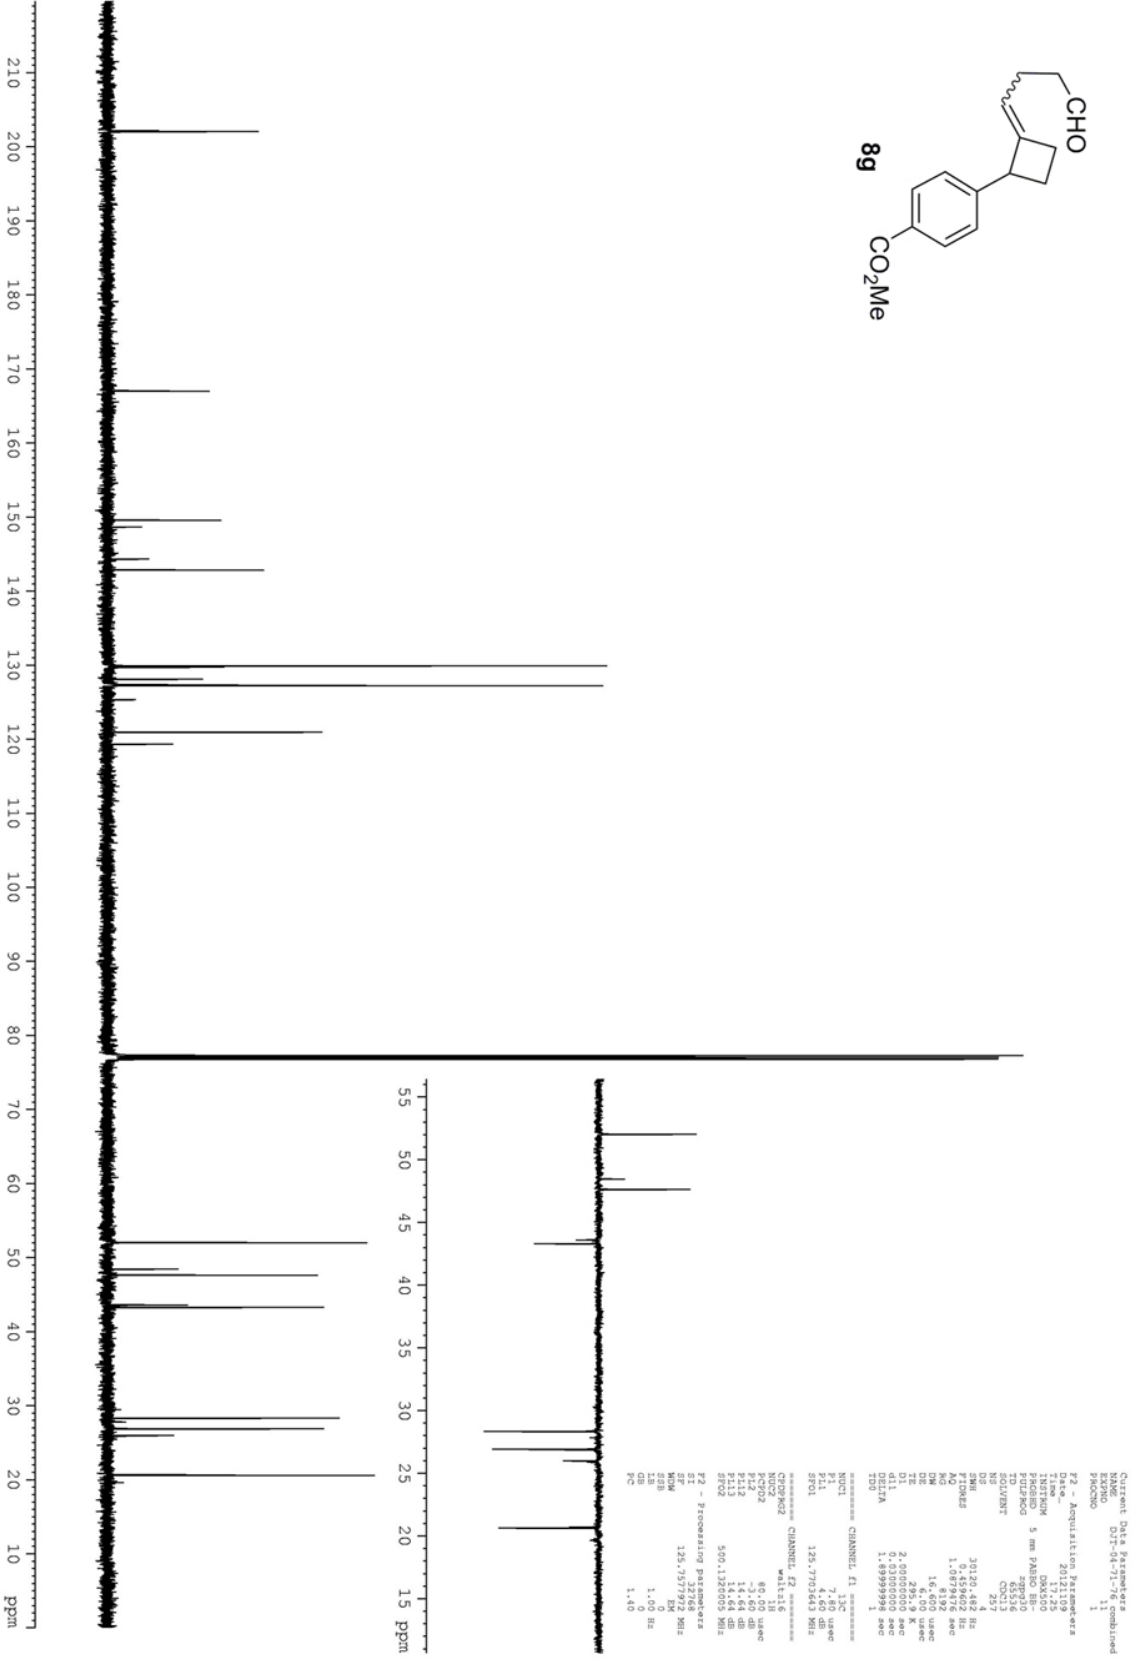



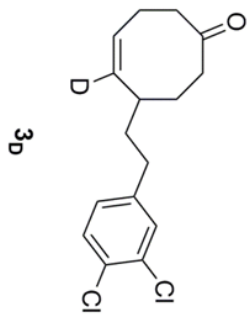

Current Data Parameters  
NAME: 5FC-11-019-01  
INSTRUM: spect  
PROCNO: 1  
F2 - Acquisition Parameters  
Date\_: 20120728  
Time: 11.01.52  
INSTRUM: spect  
PROBHD: 5 mm PABBO 2H  
PULPROG: zgpg30  
TD: 65536  
SOLVENT: dms-d6  
NS: 16  
DS: 1  
SWH: 10248.063 Hz  
FIDRES: 0.115593 Hz  
AQ: 3.122978 sec  
RG: 312.11  
DE: 2281.1 Hz  
TE: 48.00 usec  
PC: 1.000000 sec  
T1: 1.000000 sec  
T1RHO: 1  
F2 - Processing parameters  
NAME: 5FC-11-019-01  
INSTRUM: spect  
PROBHD: 5 mm PABBO 2H  
PULPROG: zgpg30  
TD: 65536  
SOLVENT: dms-d6  
NS: 16  
DS: 1  
SWH: 10248.063 Hz  
FIDRES: 0.115593 Hz  
AQ: 3.122978 sec  
RG: 312.11  
DE: 2281.1 Hz  
TE: 48.00 usec  
PC: 1.000000 sec  
T1: 1.000000 sec  
T1RHO: 1

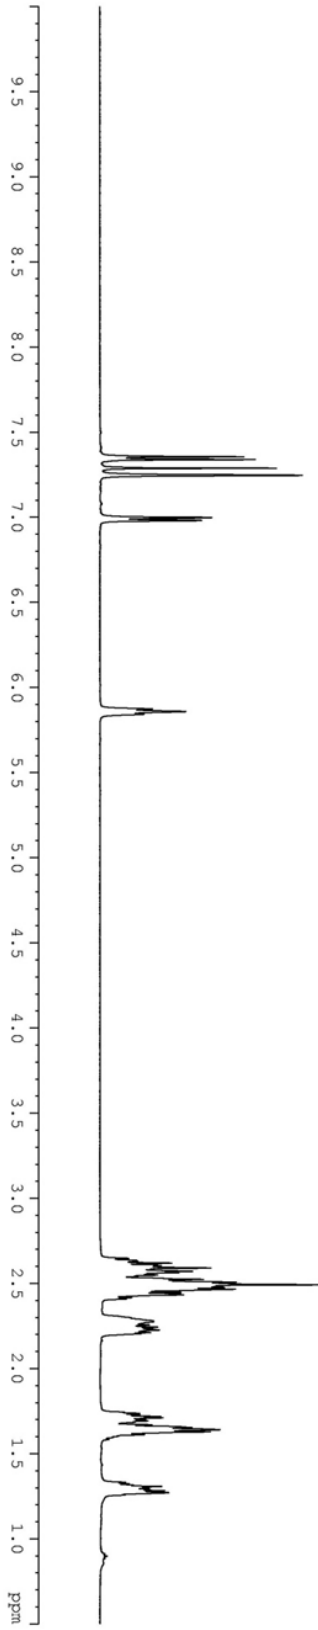

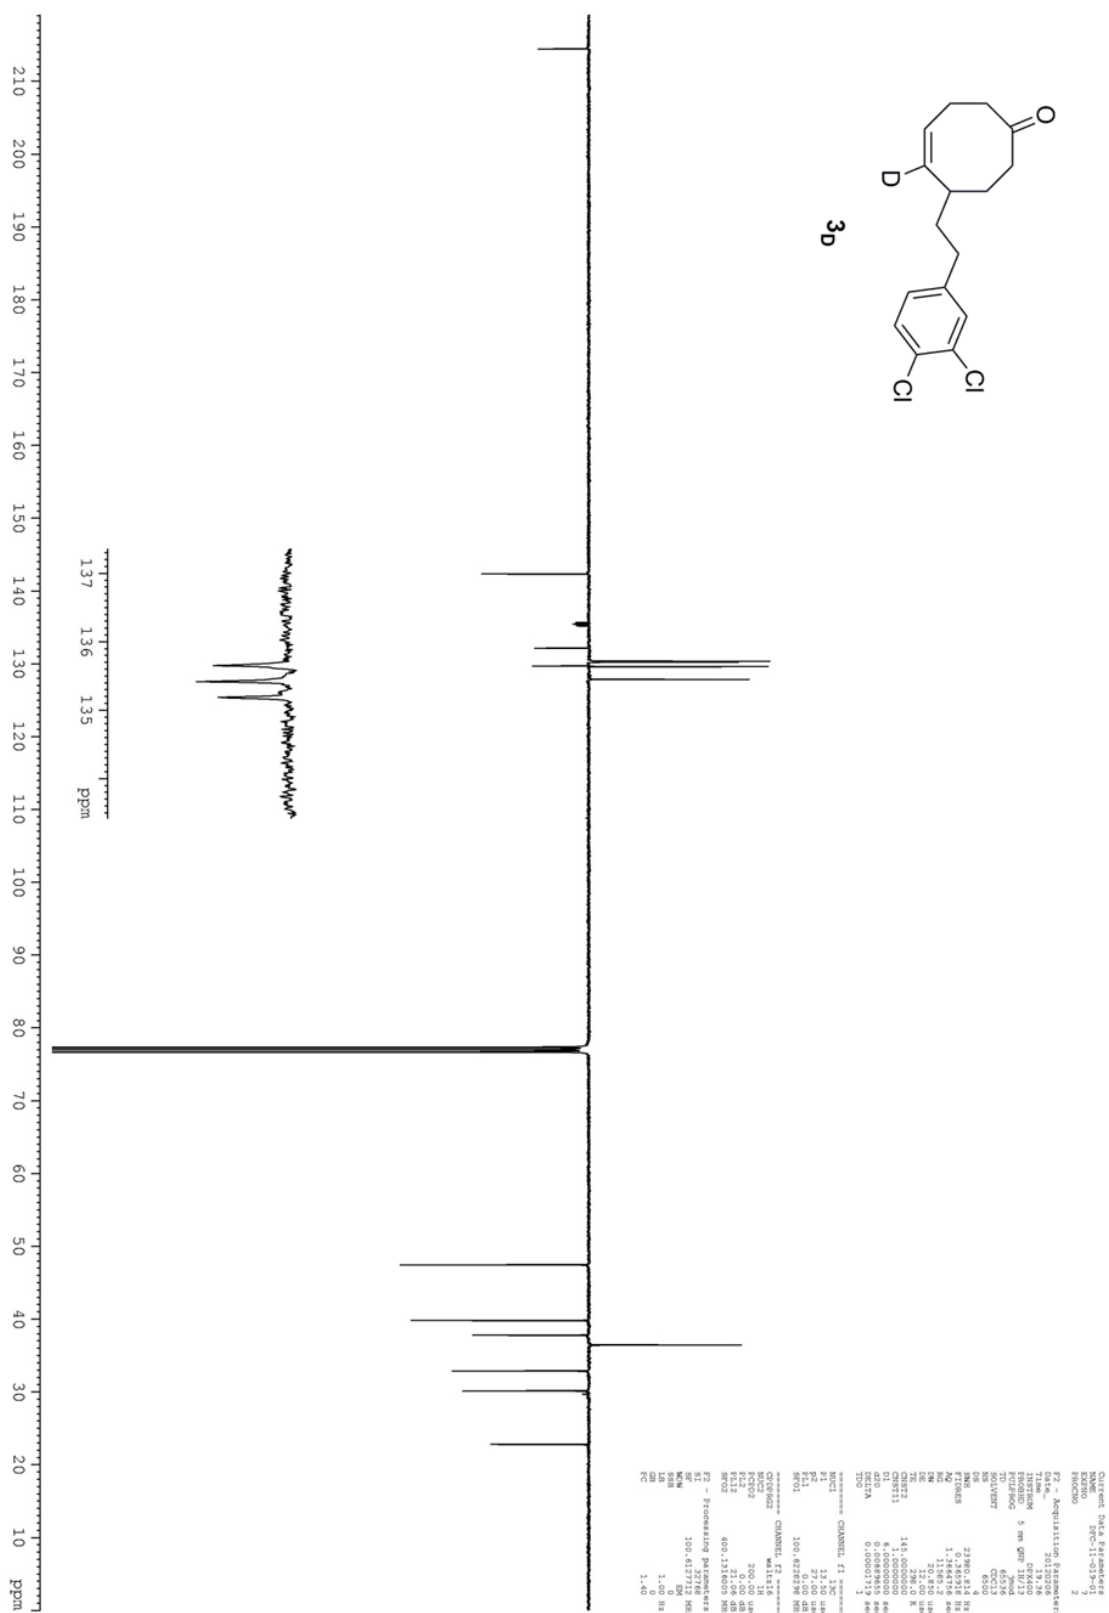

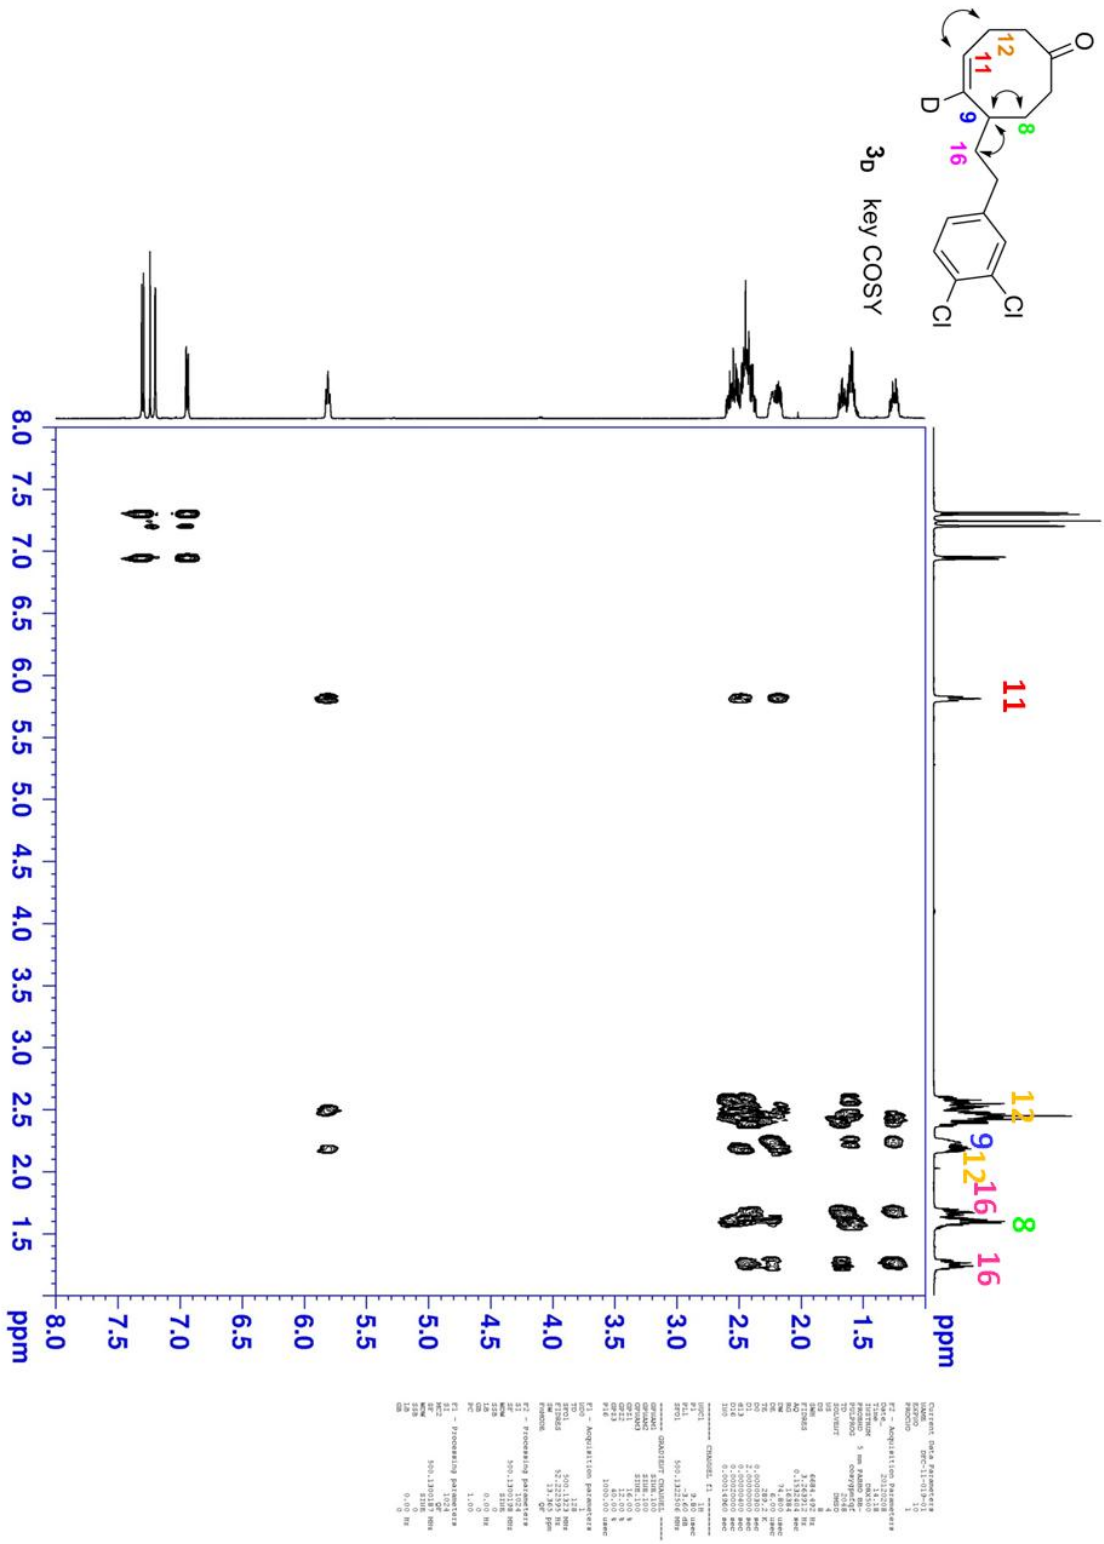

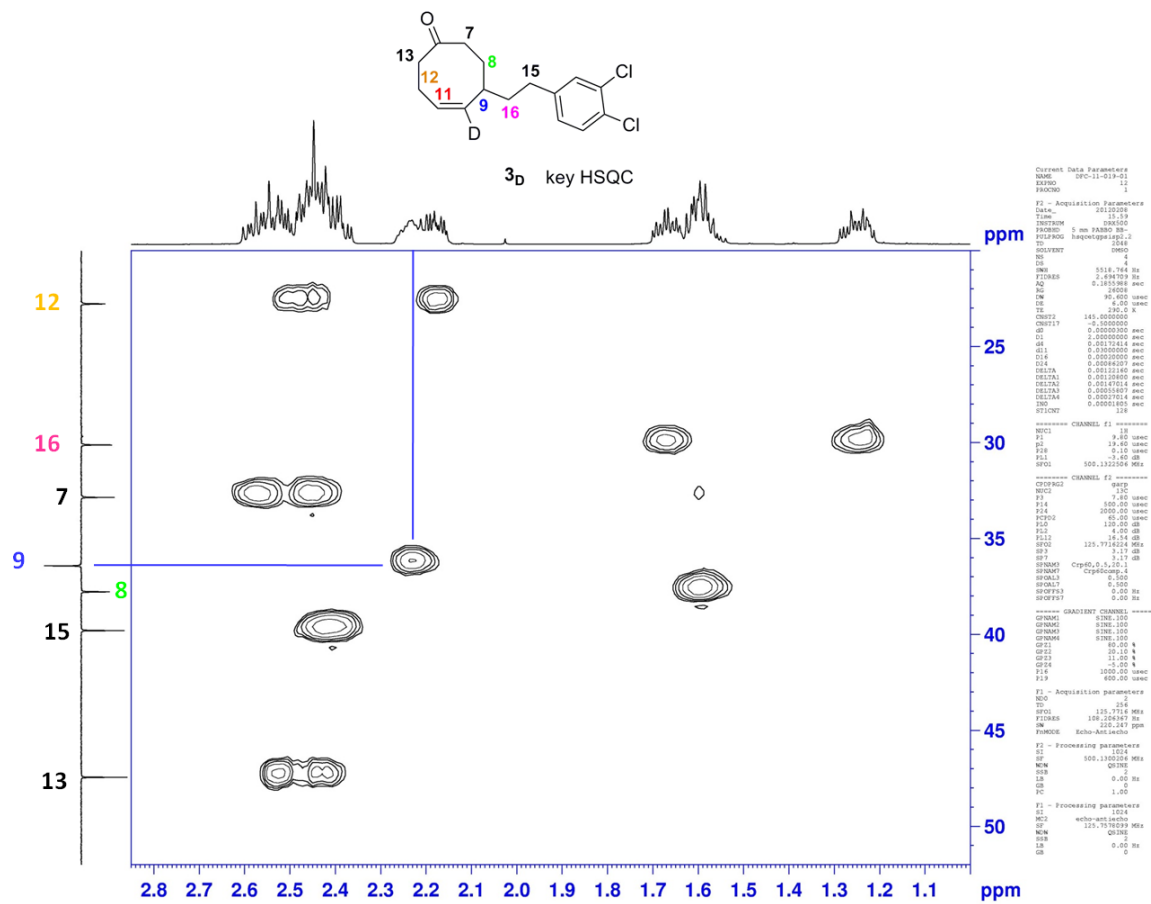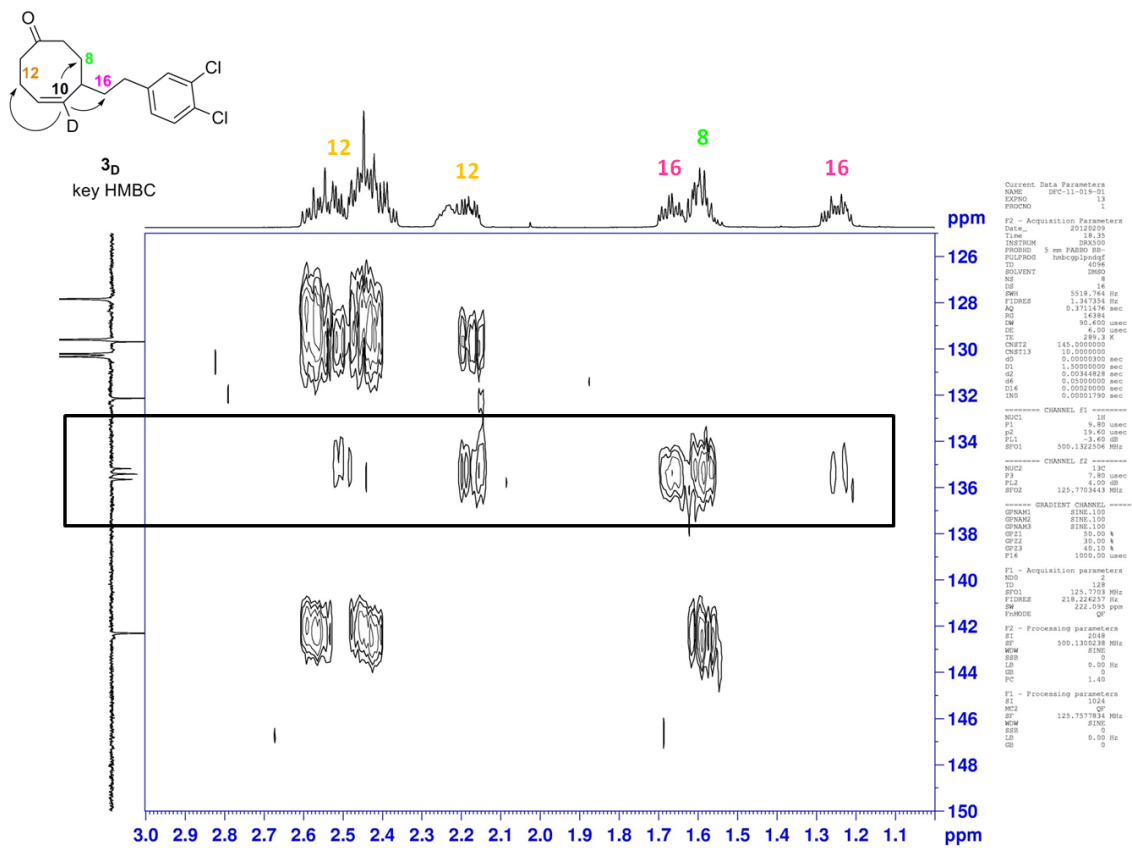

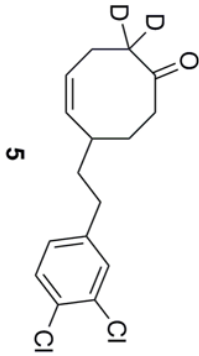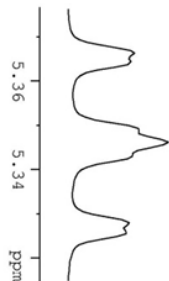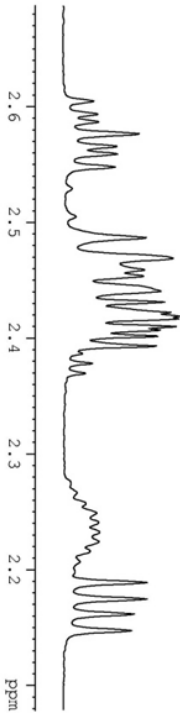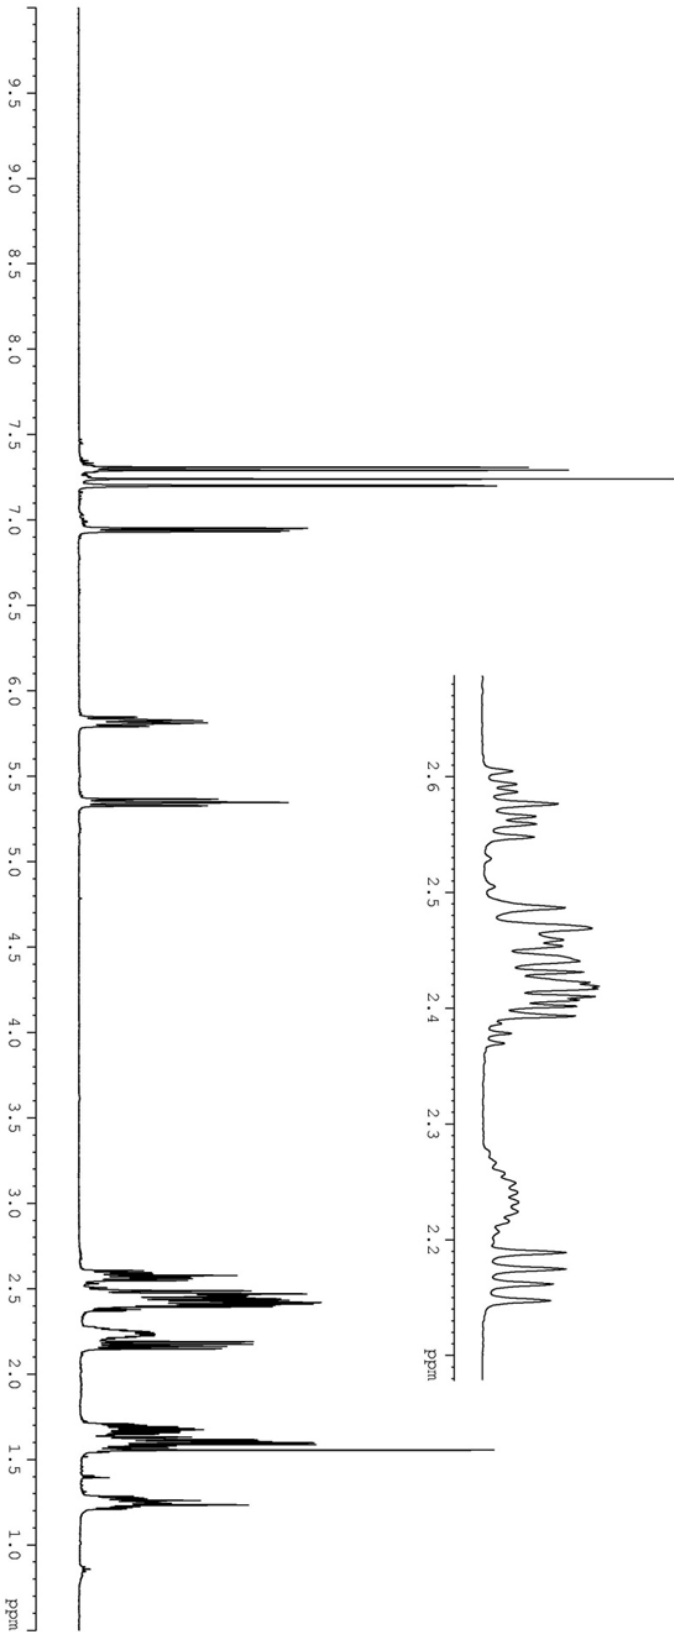

Current Data Parameters  
NAME DTC-09-151-03  
EXPNO 11  
PROCNO 11  
F2 - Acquisition Parameters  
Date\_ 20110906  
Time 18.56  
INSTRUM 5 mm PABBO500  
PROBHD 5mm QNP1H  
PULPROG zgpg30  
TD 65536  
FIDRES 0.16313  
AQ 3.1810996 sec  
RG 48.600 usec  
DE 6.00 usec  
TE 300.2 K  
D1 1.00000000 sec  
TDO 1  
===== CHANNEL f1 =====  
NUC1 1H  
P1 12.00 usec  
PL1 -3.40 dB  
SFO1 500.1330885 MHz  
F2 - Processing parameters  
SI 32768  
SF 500.1330922 MHz  
WDW EM  
SSB 0  
GB 0.30 Hz  
PC 1.00

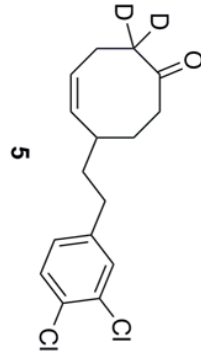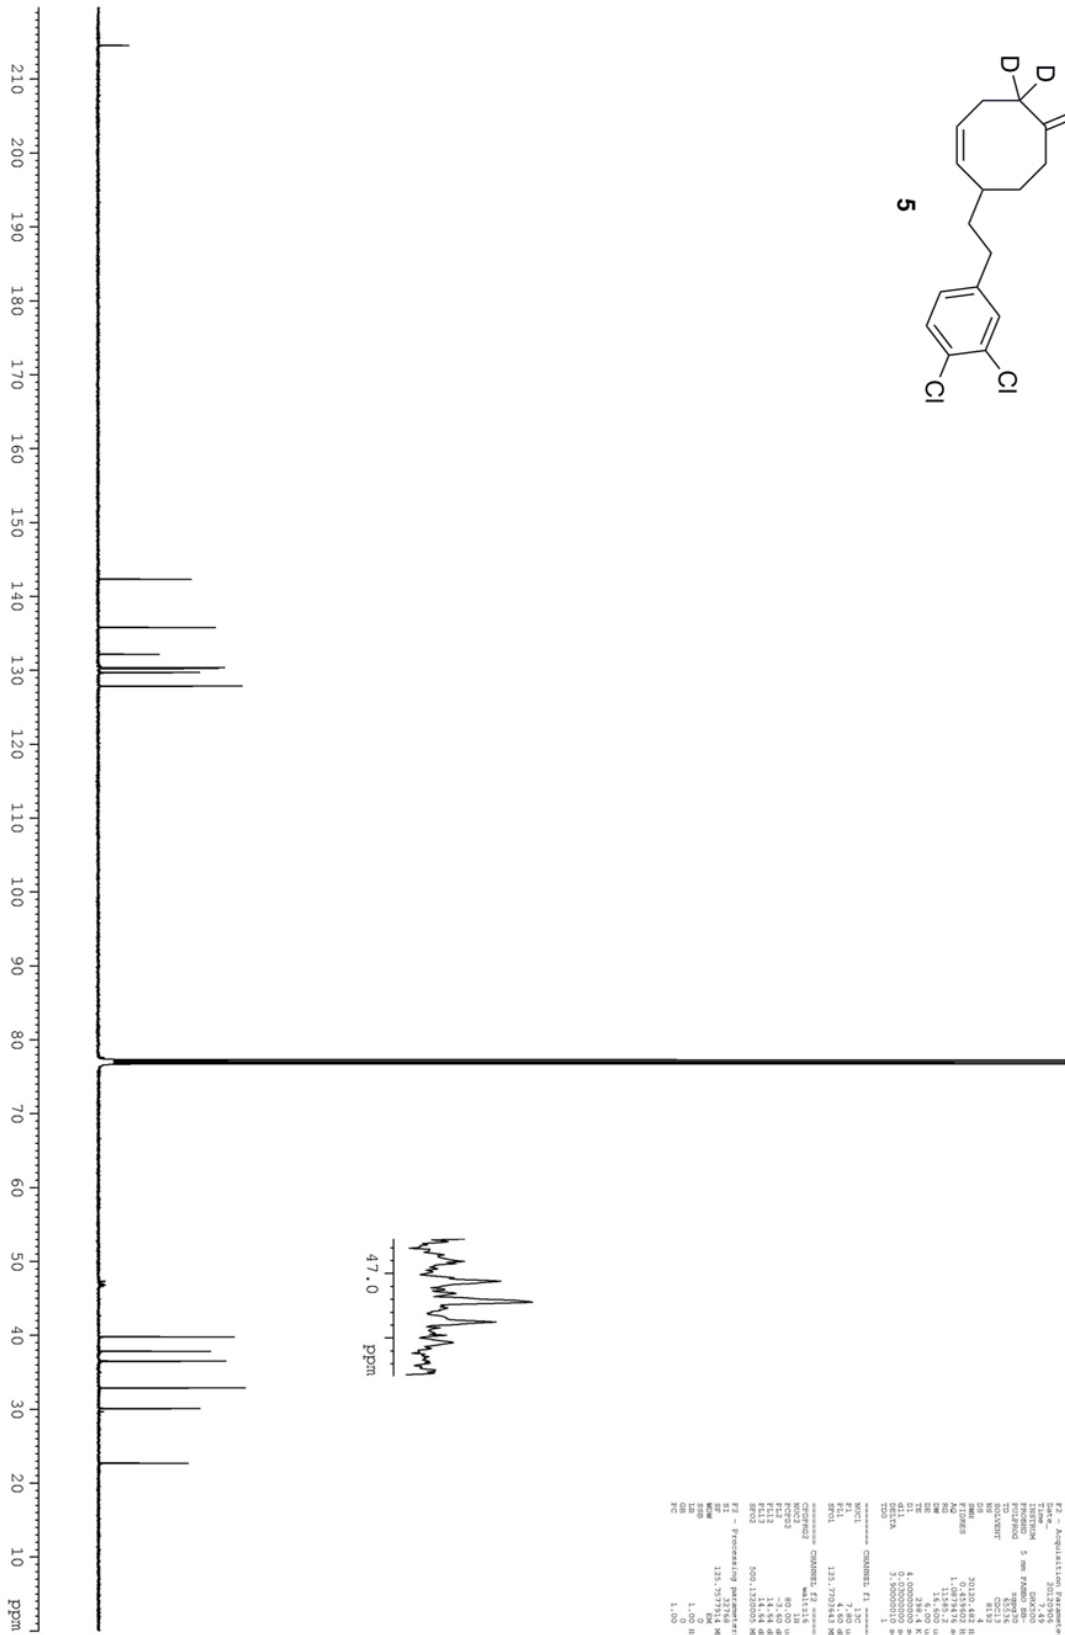

Current Data Parameters  
EXPNO 2  
PROCNO 1  
F2 - Acquisition Parameters  
Date\_ 20120905  
Time 7:45  
INSTRUM spect  
PROBHD 5 mm PABBO-BB-  
TD 65536  
AQ 0.05135  
RG 327.68  
WDW EM  
SSB 0  
GB 0  
PC 1  
F2 - Processing parameters  
SI 32768  
SF 125.760343 MHz  
WDW EM  
SSB 0  
GB 0  
PC 1  
F2 - Acquisition Parameters  
Date\_ 20120905  
Time 7:45  
INSTRUM spect  
PROBHD 5 mm PABBO-BB-  
TD 65536  
AQ 0.05135  
RG 327.68  
WDW EM  
SSB 0  
GB 0  
PC 1  
F2 - Processing parameters  
SI 32768  
SF 125.760343 MHz  
WDW EM  
SSB 0  
GB 0  
PC 1



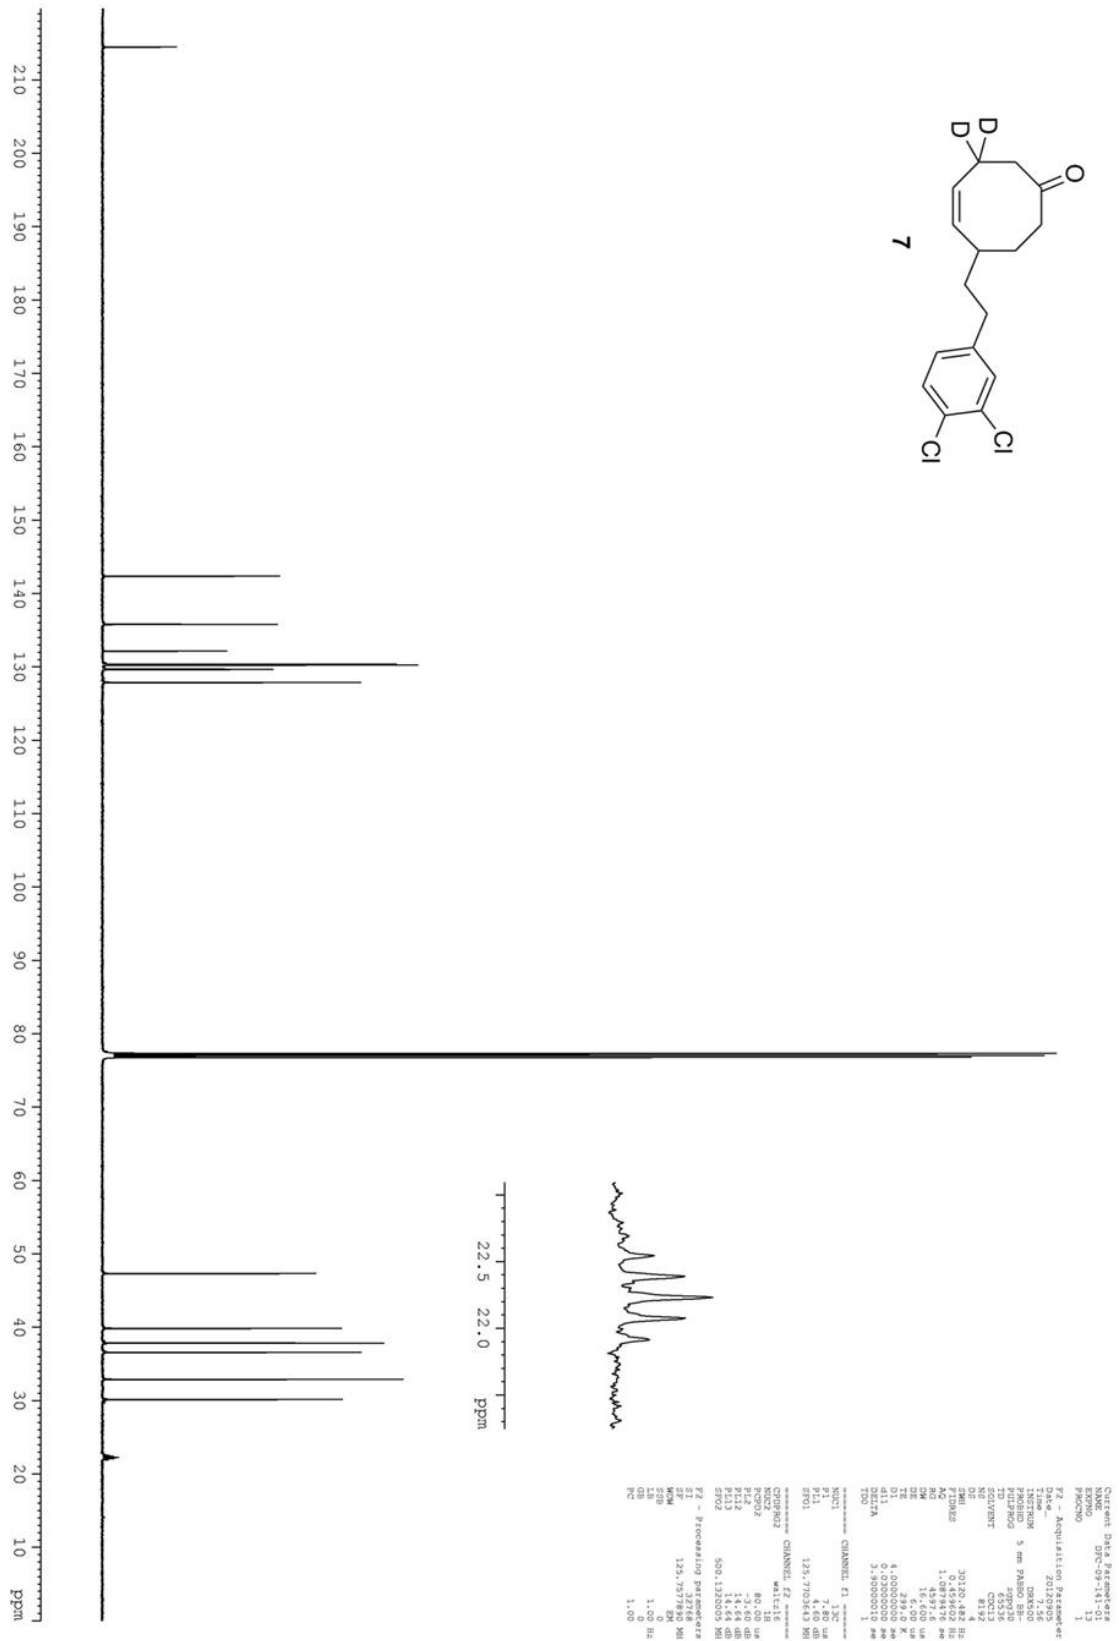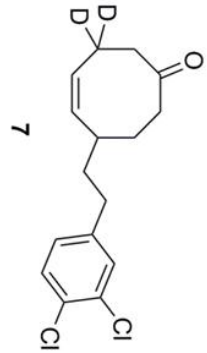



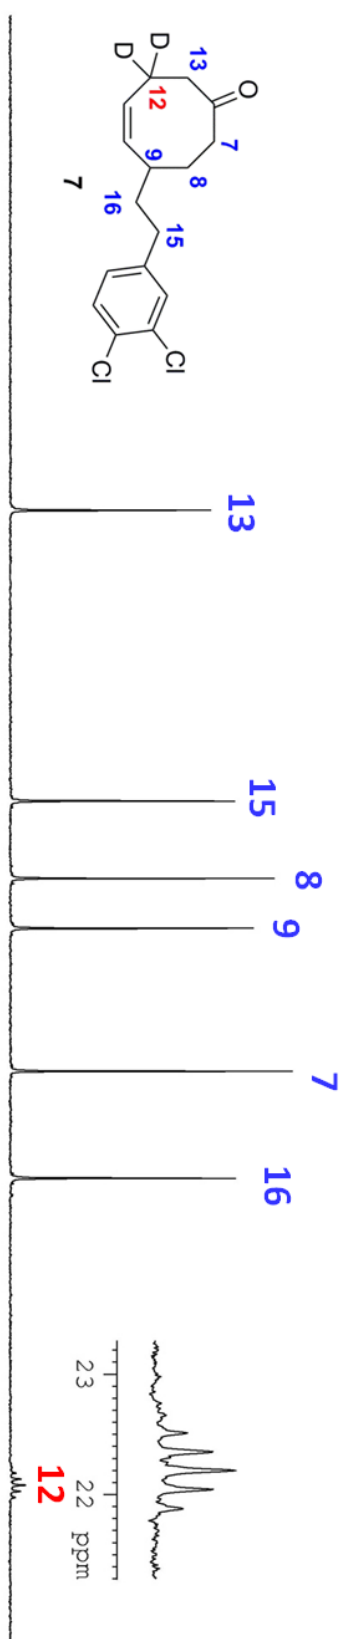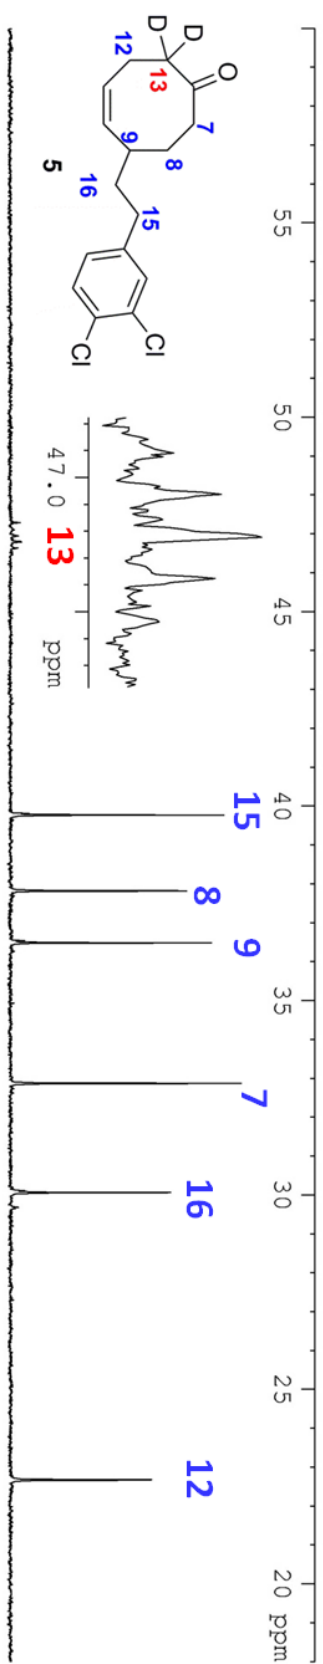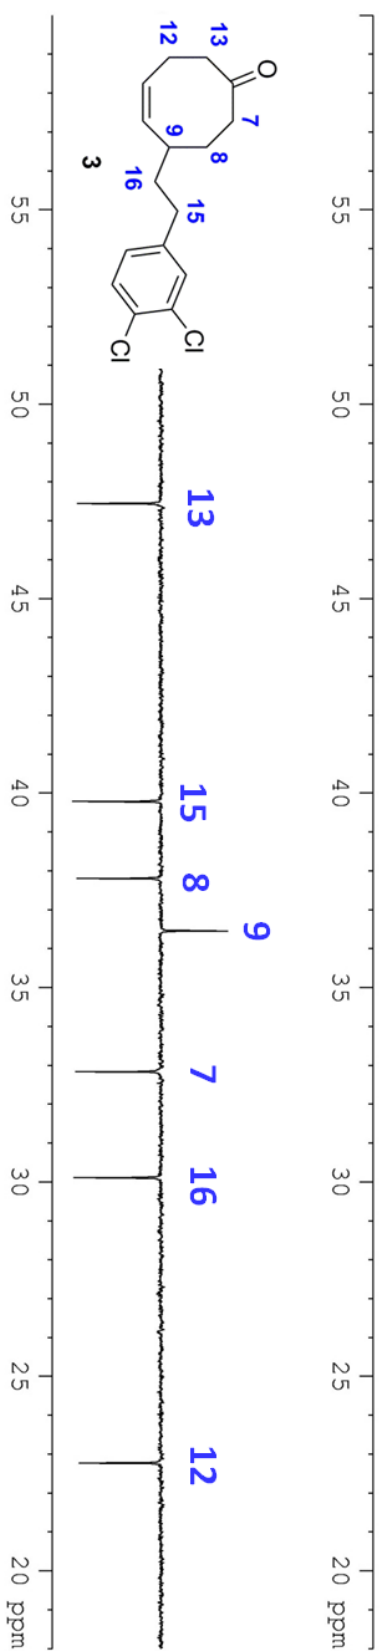

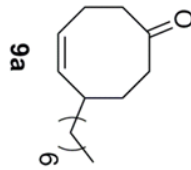

Current Data Parameters  
NAME CBA-03-172-B1  
EXPNO 1  
PROCNO 1  
F2 - Acquisition Parameters  
Date\_ 20120419  
Time 12.00  
INSTRUM spect  
PROBHD 5 mm PABBO BB-  
PULPROG zgpg30  
TD 65536  
SFO 500.130883  
AQ 1.0000000  
RG 16  
WDW EM  
SS 2  
LB 10.00 Hz  
GB 0  
PC 1.00  
FIDRES 0.196983 Hz  
AQ 3.180083 Hz  
RG 16.00  
WDW EM  
SS 2  
LB 10.00 Hz  
GB 0  
PC 1.00  
F2 - Processing parameters  
SI 32768  
SF 500.130883 MHz  
WDW EM  
SS 2  
LB 10.00 Hz  
GB 0  
PC 1.00

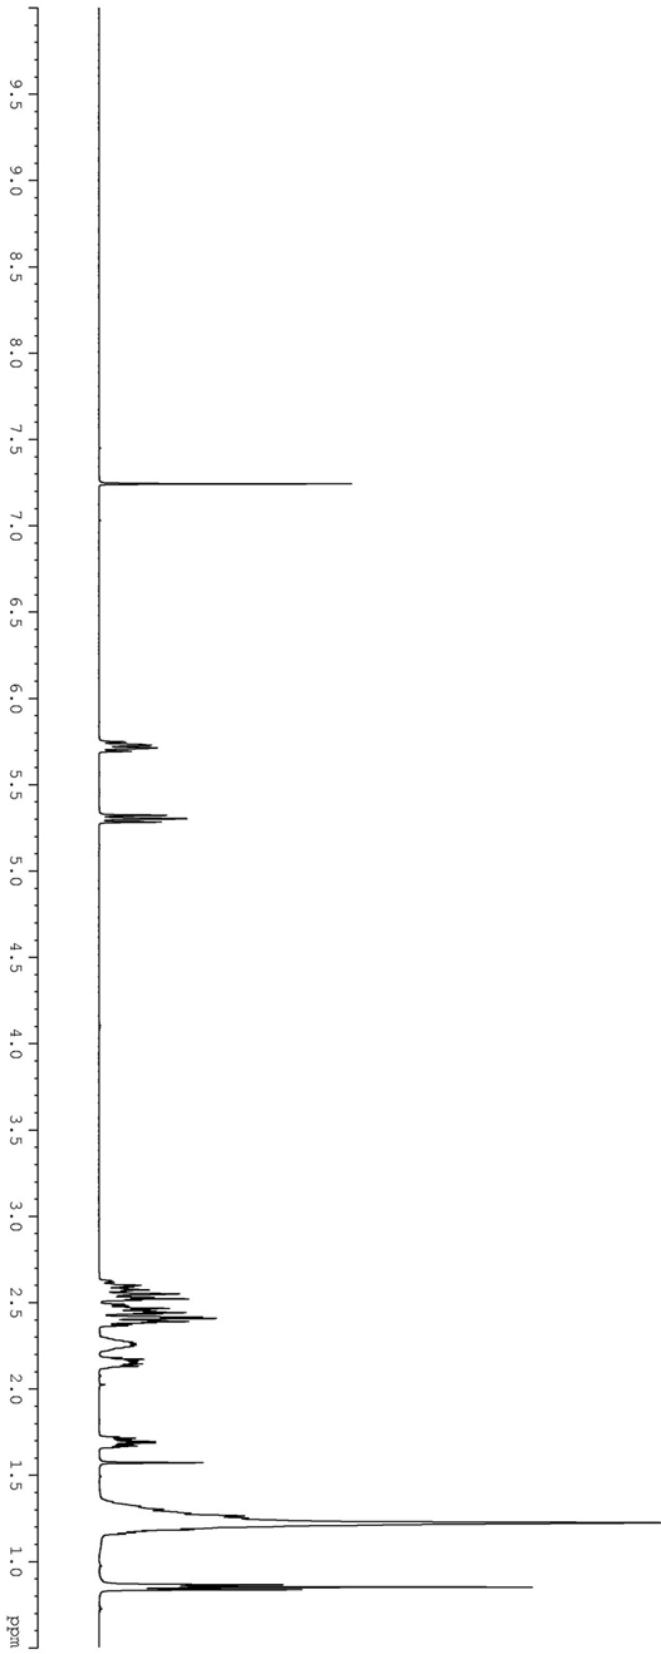

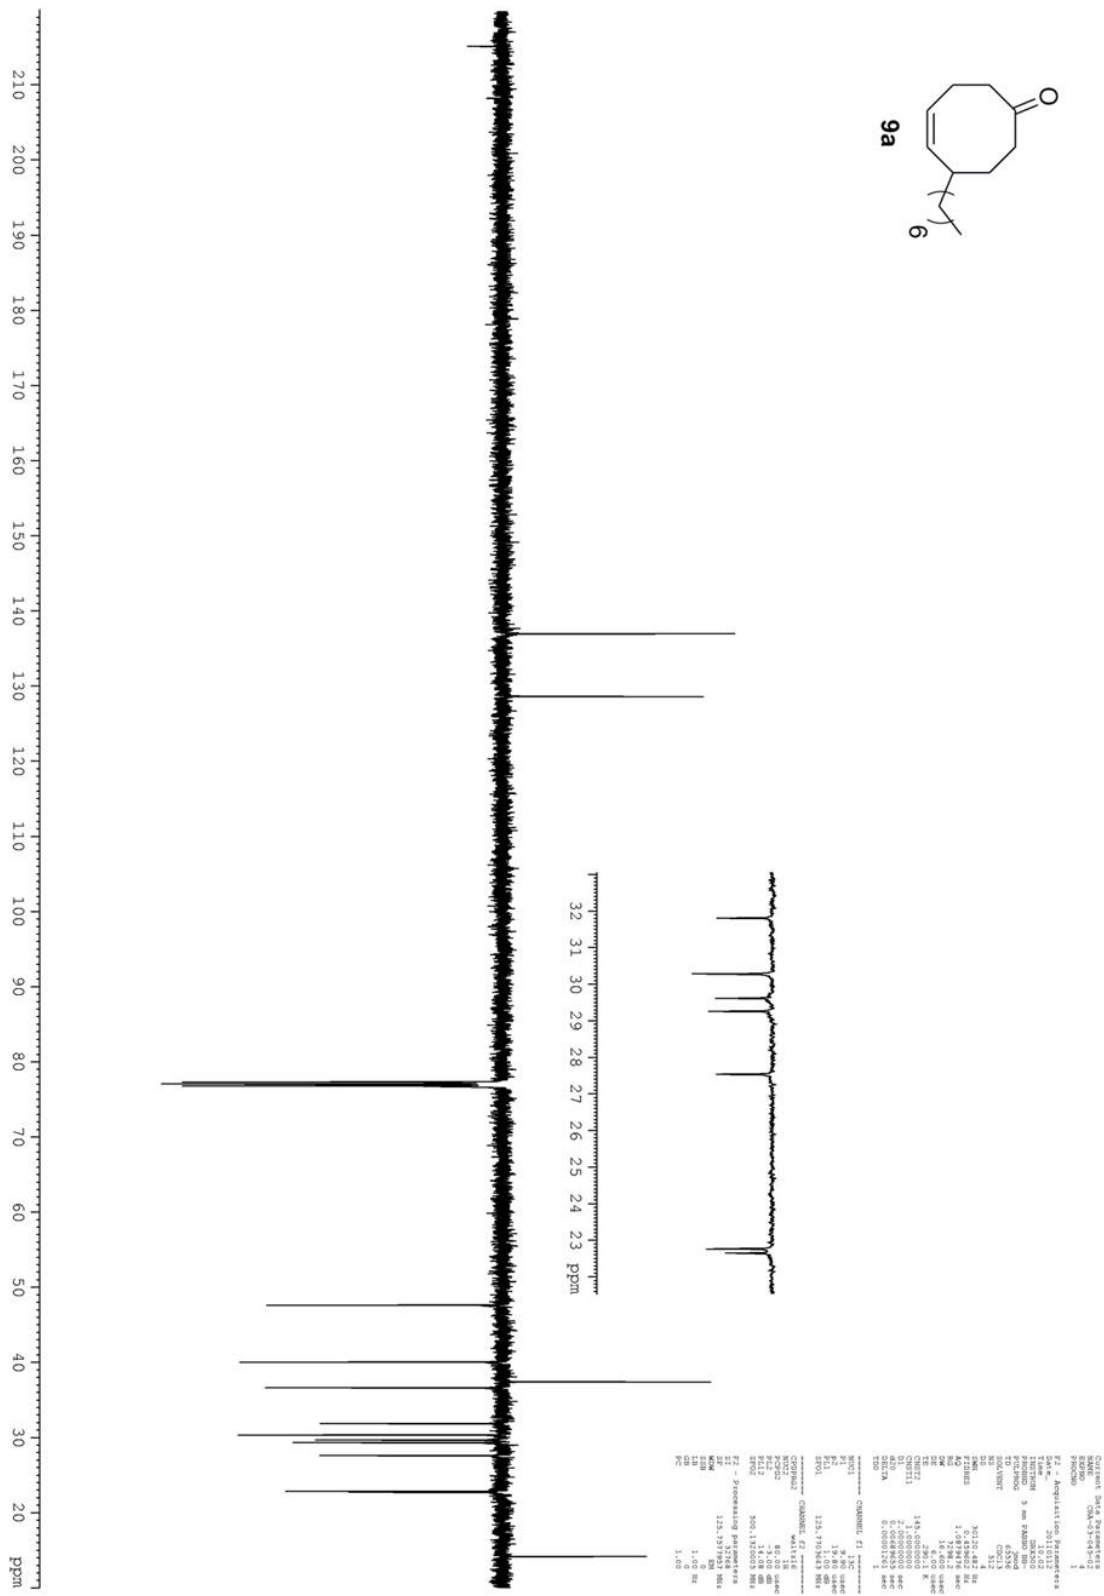

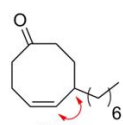

key COSY

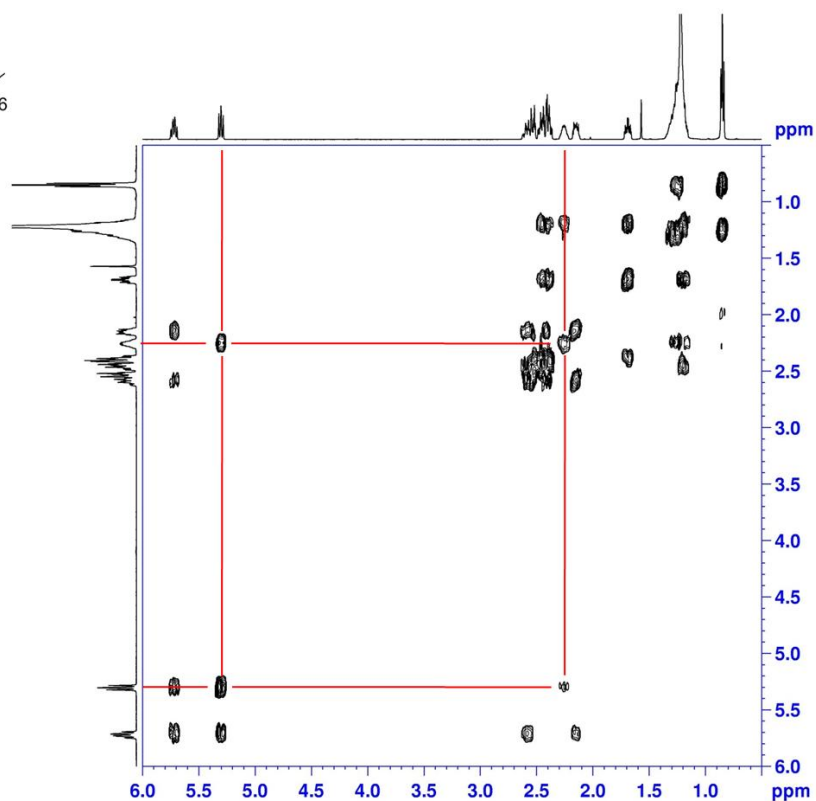

Current Data Parameters  
NAME 20120423  
EXPNO 3  
PROCNO 1

F2 - Acquisition Parameters  
Date\_ 20120423  
Time 13.35  
INSTRUM spect  
PROBHD 5 mm PABBO R8-  
PULPROG zgpg30  
TD 65536  
SOLVENT DMSO  
DS 1  
SWH 6464.492 Hz  
FIDRES 3.143112 Hz  
AQ 0.1532404 sec  
RG 320.33  
DM 74.500 usec  
DE 6.00 usec  
TE 300.1 K  
DQ 0.00000000 sec  
DI 0.00000000 sec  
d13 0.00004000 sec  
d15 0.00000000 sec  
IND 0.00014940 sec

===== CHANNEL f1 =====  
NUC1 13C  
P1 9.00 usec  
PL1 -3.40 dB  
SFO1 500.1300148 MHz

===== GRADIENT CHANNEL =====  
GPM1 SINE.100  
GPM2 SINE.100  
GPM3 SINE.100  
GPD1 14.00 V  
GPD2 12.00 V  
GPD3 10.00 V  
P12 1000.00 usec

F1 - Acquisition parameters  
NUC1 13C  
SFO1 500.1300148 MHz  
FIDRES 32.222000 Hz  
DM 13.360 ppm  
PACORR QF

F2 - Processing parameters  
SI 32768  
SF 500.1300148 MHz  
WDW EM  
SSB 0  
LB 0.00 Hz  
GB 1.00  
PC 1.00

F1 - Processing parameters  
SI 32768  
SF 500.1300148 MHz  
WDW EM  
SSB 0  
LB 0.00 Hz  
GB 0

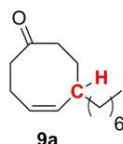

key HSQC

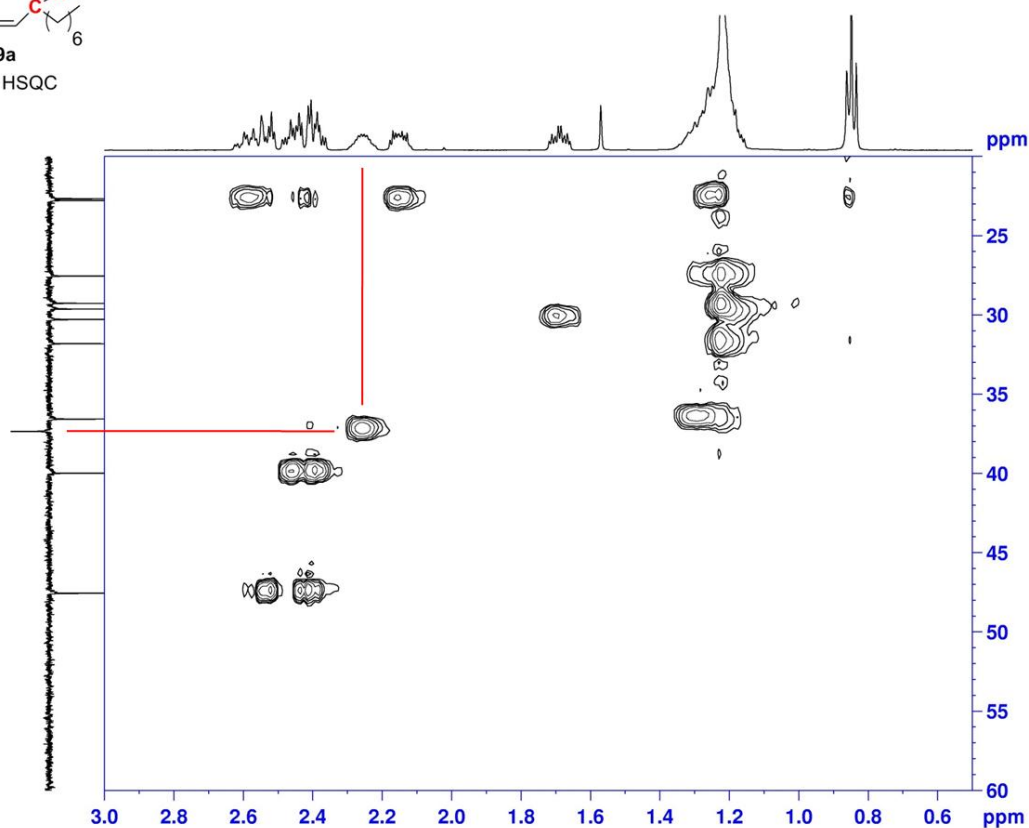

Current Data Parameters  
NAME 20120423  
EXPNO 3  
PROCNO 1

F2 - Acquisition Parameters  
Date\_ 20120423  
Time 13.35  
INSTRUM spect  
PROBHD 5 mm PABBO R8-  
PULPROG zgpg30  
TD 65536  
SOLVENT DMSO  
DS 1  
SWH 6464.492 Hz  
FIDRES 3.143112 Hz  
AQ 0.1532404 sec  
RG 320.33  
DM 74.500 usec  
DE 6.00 usec  
TE 300.1 K  
DQ 0.00000000 sec  
DI 0.00000000 sec  
d13 0.00004000 sec  
d15 0.00000000 sec  
IND 0.00014940 sec

===== CHANNEL f1 =====  
NUC1 13C  
P1 9.00 usec  
PL1 -3.40 dB  
SFO1 500.1300148 MHz

===== GRADIENT CHANNEL =====  
GPM1 SINE.100  
GPM2 SINE.100  
GPM3 SINE.100  
GPD1 14.00 V  
GPD2 12.00 V  
GPD3 10.00 V  
P12 1000.00 usec

F1 - Acquisition parameters  
NUC1 13C  
SFO1 500.1300148 MHz  
FIDRES 32.222000 Hz  
DM 13.360 ppm  
PACORR QF

F2 - Processing parameters  
SI 32768  
SF 500.1300148 MHz  
WDW EM  
SSB 0  
LB 0.00 Hz  
GB 1.00  
PC 1.00

F1 - Processing parameters  
SI 32768  
SF 500.1300148 MHz  
WDW EM  
SSB 0  
LB 0.00 Hz  
GB 0

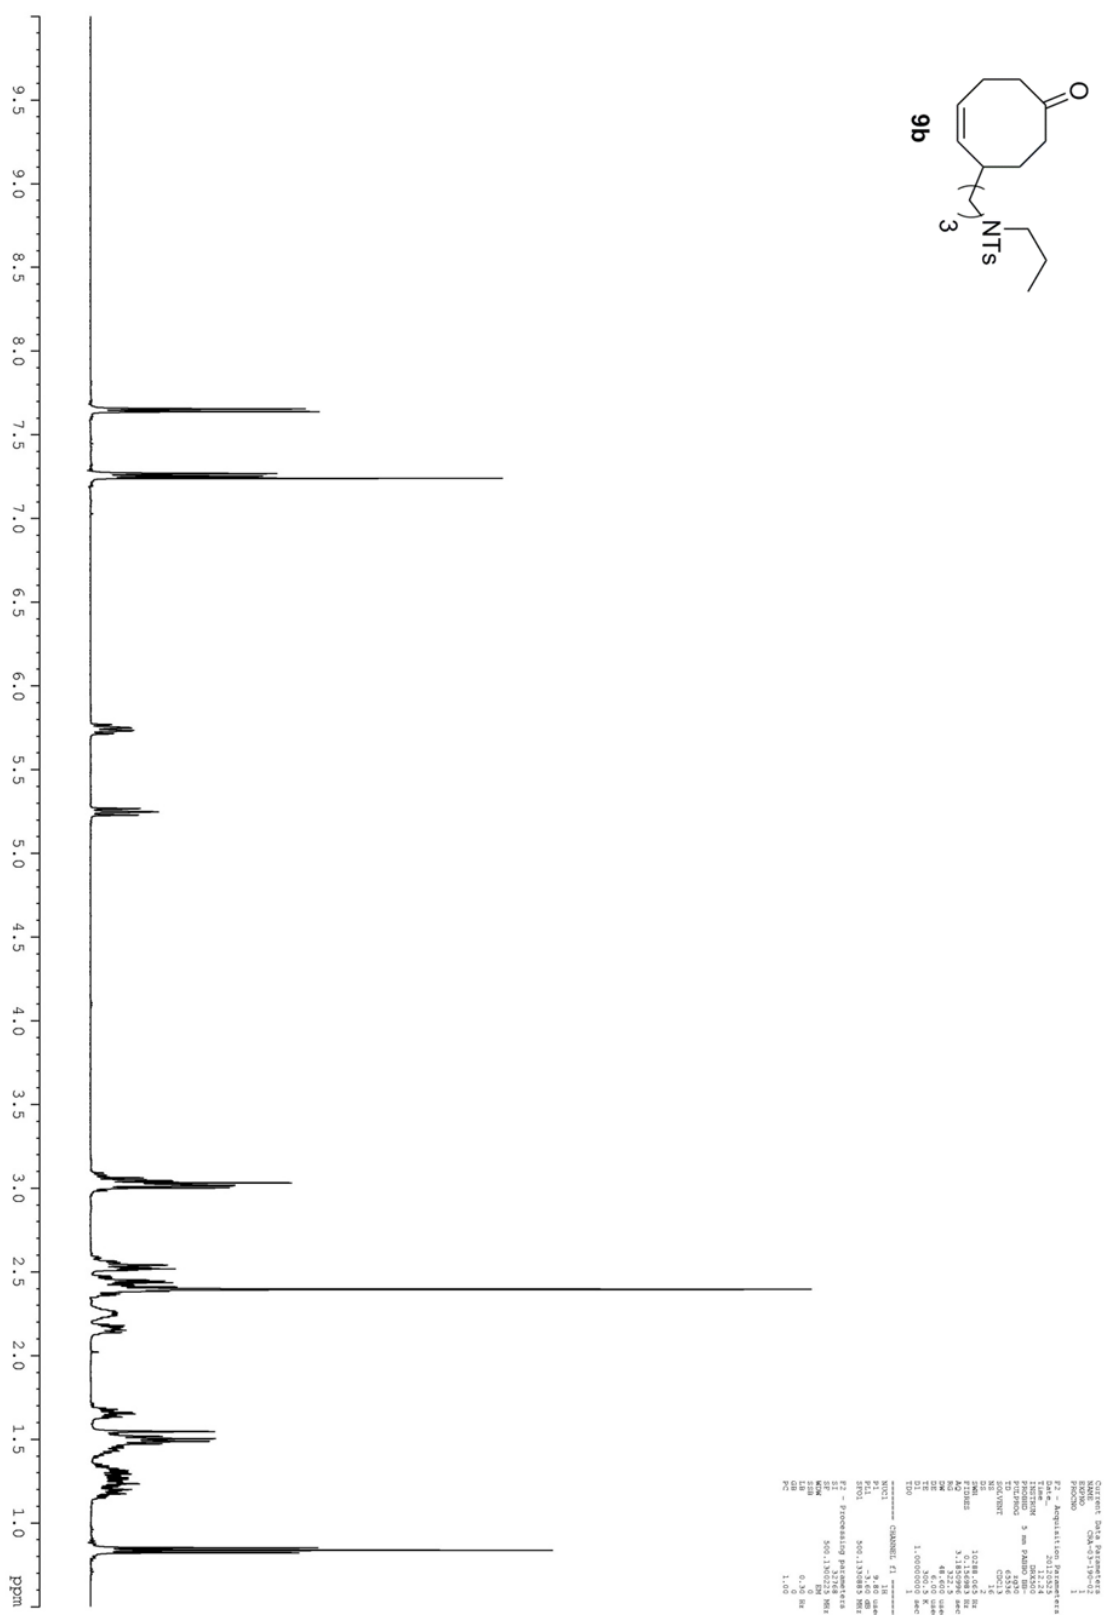

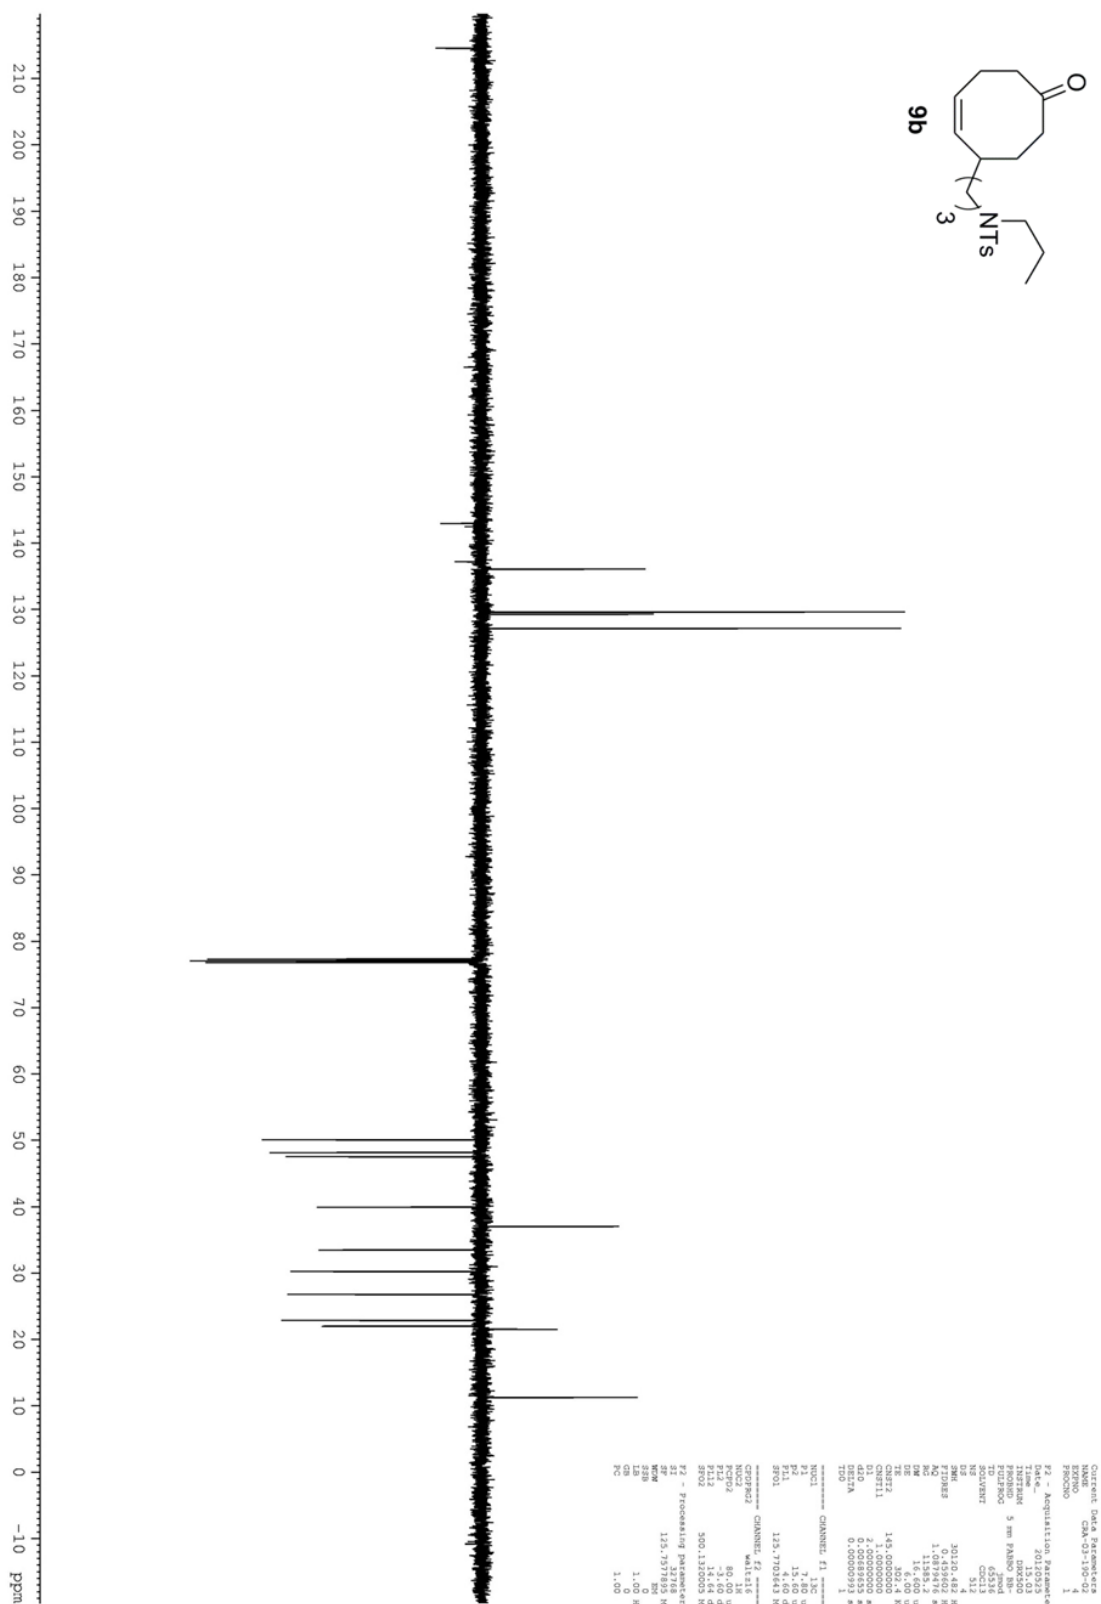

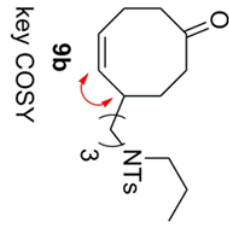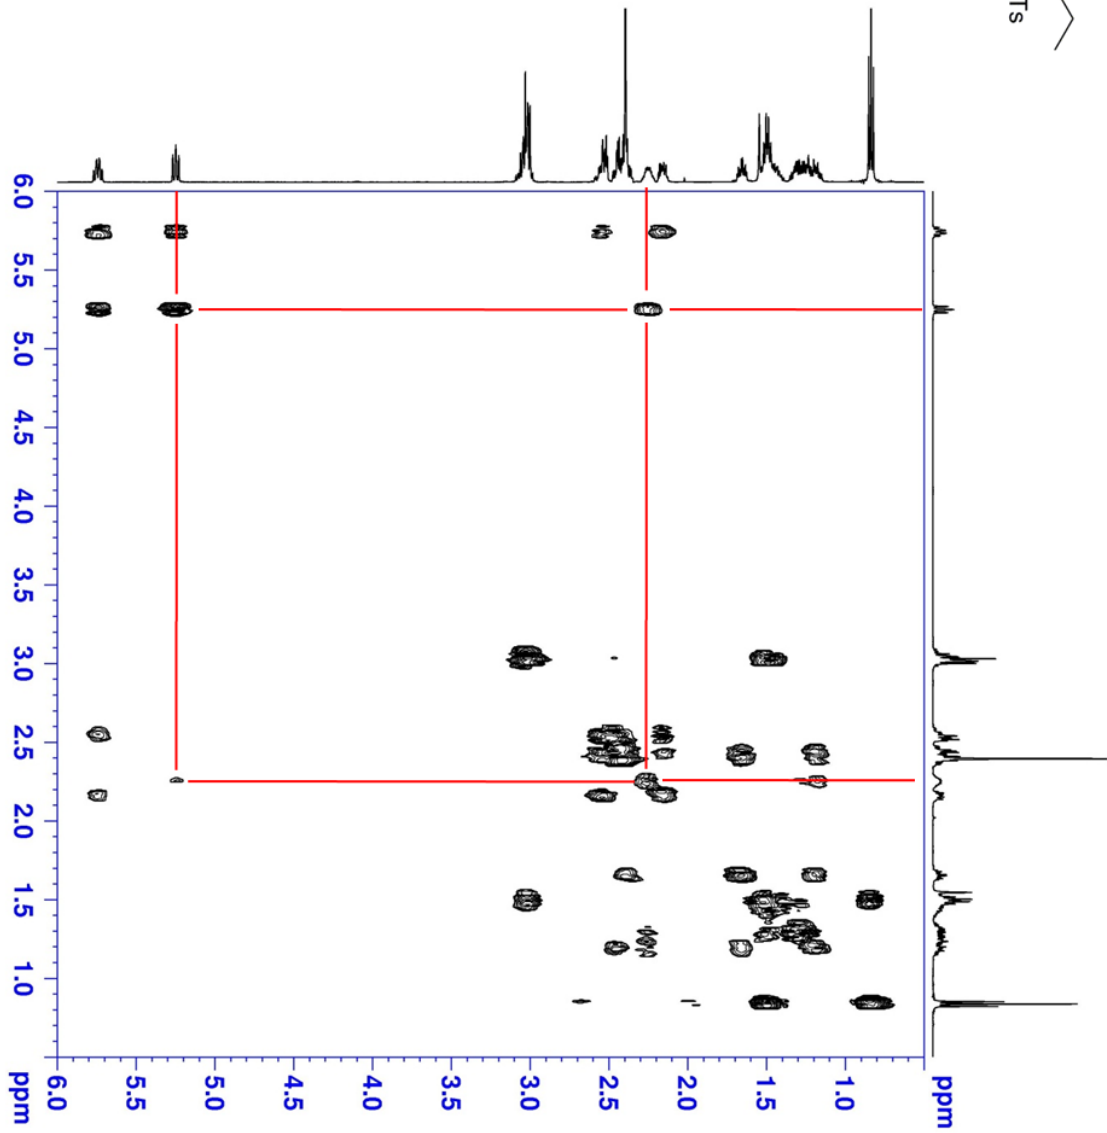

Current: Data Parameters  
NAME: 20120321  
EXPNO: 2  
PROCNO: 1  
F2 - Acquisition Parameters  
Date\_: 20120321  
Time: 12.00  
INSTRUM: spect  
PROBHD: 5 mm BBO-1H/13  
PULPROG: zgpg30  
PCPROG: zgpg30  
F2 - Processing parameters  
SI - F2 - Acquisition Parameters  
Date\_: 20120321  
Time: 12.00  
INSTRUM: spect  
PROBHD: 5 mm BBO-1H/13  
PULPROG: zgpg30  
PCPROG: zgpg30  
F2 - Processing parameters  
SI - F2 - Acquisition Parameters  
Date\_: 20120321  
Time: 12.00  
INSTRUM: spect  
PROBHD: 5 mm BBO-1H/13  
PULPROG: zgpg30  
PCPROG: zgpg30





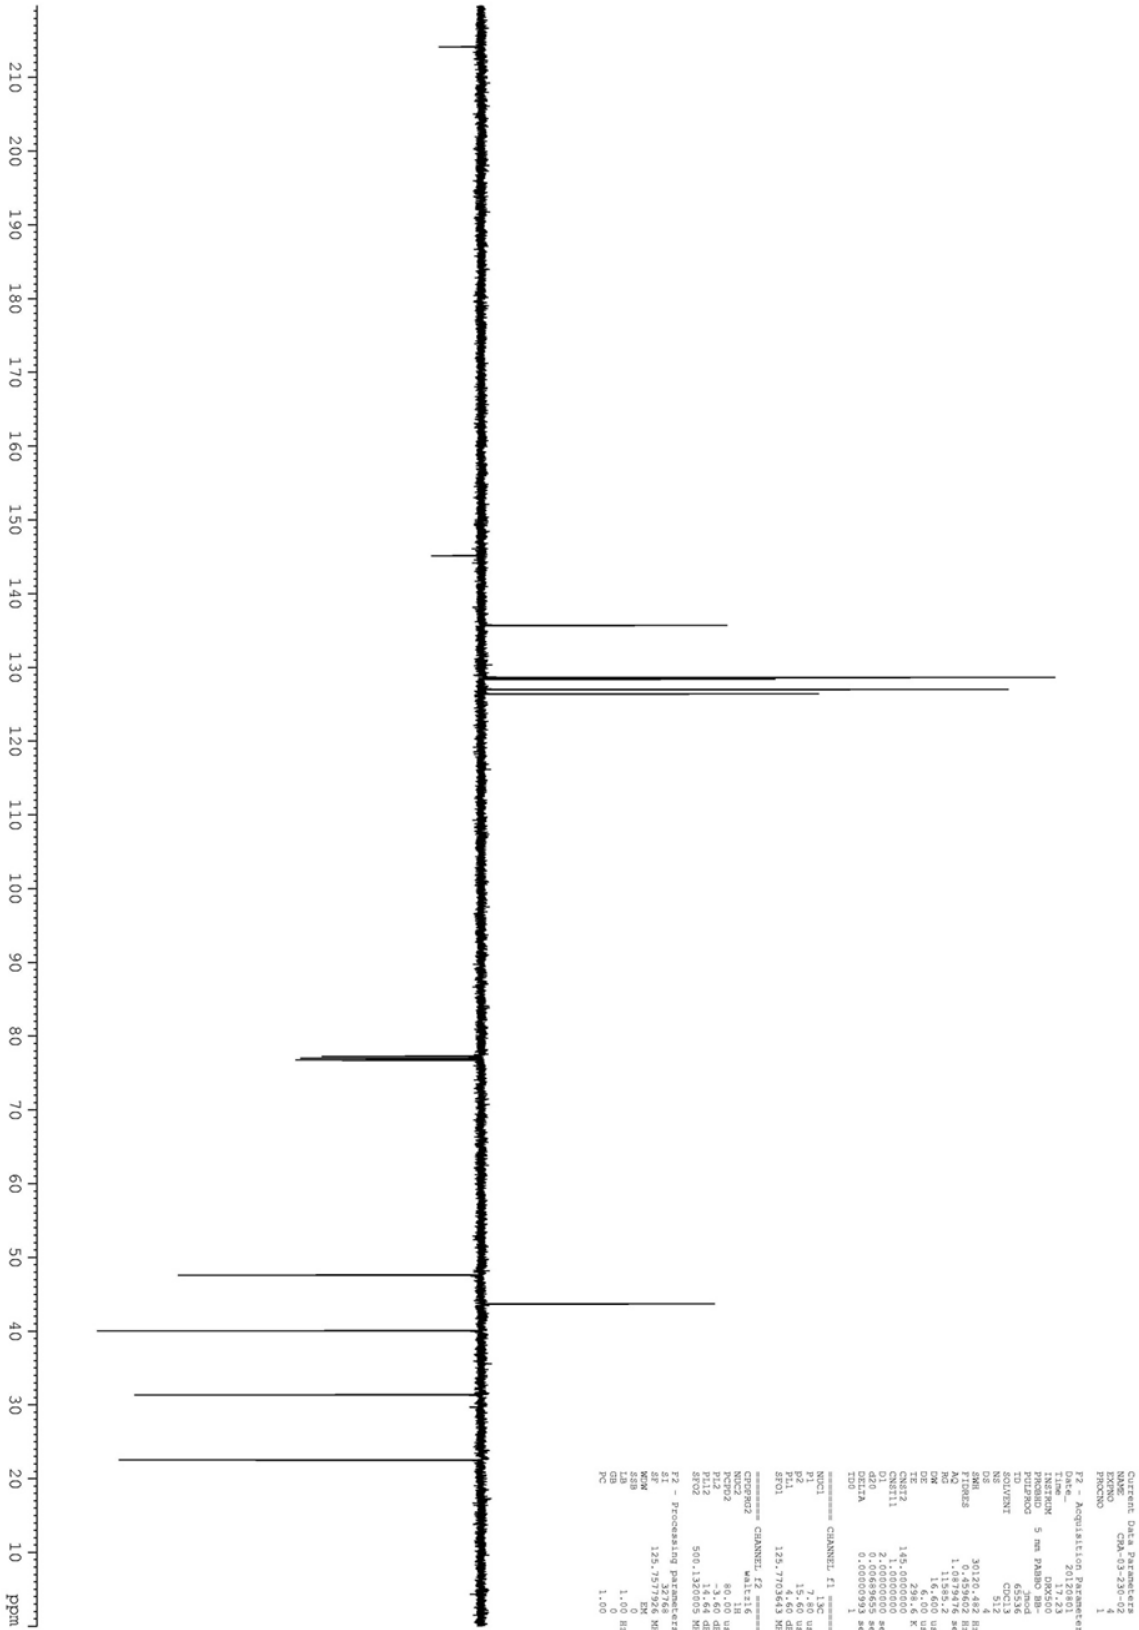

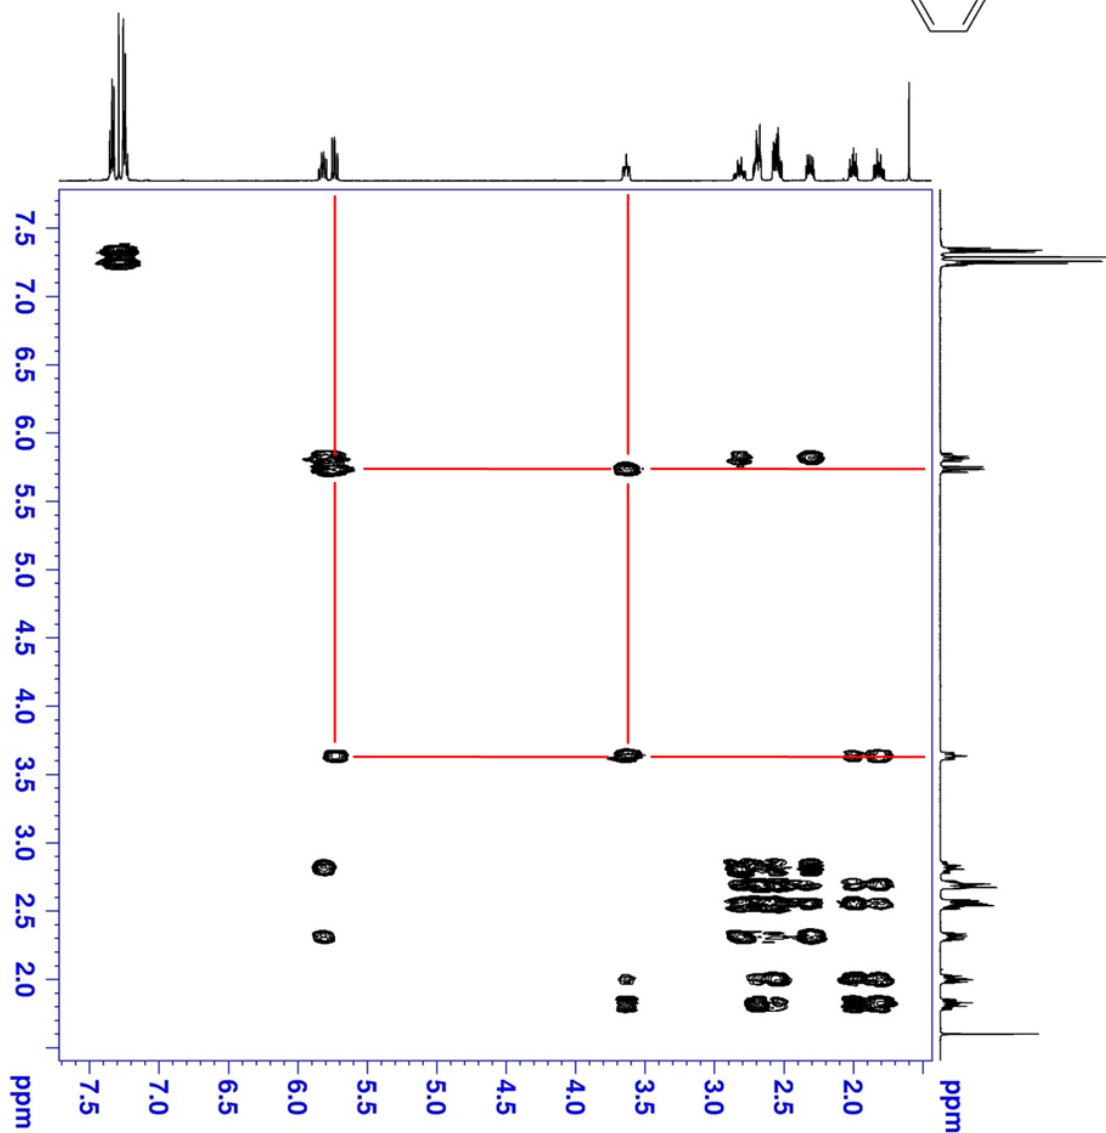

| Current Data Parameters |           | Current Data Parameters |           |
|-------------------------|-----------|-------------------------|-----------|
| NAME                    | VALUE     | NAME                    | VALUE     |
| ----- CHANNEL 1 -----   |           |                         |           |
| F1                      | 10.000000 | F2                      | 10.000000 |
| F3                      | 10.000000 | F4                      | 10.000000 |
| F5                      | 10.000000 | F6                      | 10.000000 |
| F7                      | 10.000000 | F8                      | 10.000000 |
| F9                      | 10.000000 | F10                     | 10.000000 |
| F11                     | 10.000000 | F12                     | 10.000000 |
| F13                     | 10.000000 | F14                     | 10.000000 |
| F15                     | 10.000000 | F16                     | 10.000000 |
| F17                     | 10.000000 | F18                     | 10.000000 |
| F19                     | 10.000000 | F20                     | 10.000000 |
| F21                     | 10.000000 | F22                     | 10.000000 |
| F23                     | 10.000000 | F24                     | 10.000000 |
| F25                     | 10.000000 | F26                     | 10.000000 |
| F27                     | 10.000000 | F28                     | 10.000000 |
| F29                     | 10.000000 | F30                     | 10.000000 |
| F31                     | 10.000000 | F32                     | 10.000000 |
| F33                     | 10.000000 | F34                     | 10.000000 |
| F35                     | 10.000000 | F36                     | 10.000000 |
| F37                     | 10.000000 | F38                     | 10.000000 |
| F39                     | 10.000000 | F40                     | 10.000000 |
| F41                     | 10.000000 | F42                     | 10.000000 |
| F43                     | 10.000000 | F44                     | 10.000000 |
| F45                     | 10.000000 | F46                     | 10.000000 |
| F47                     | 10.000000 | F48                     | 10.000000 |
| F49                     | 10.000000 | F50                     | 10.000000 |
| F51                     | 10.000000 | F52                     | 10.000000 |
| F53                     | 10.000000 | F54                     | 10.000000 |
| F55                     | 10.000000 | F56                     | 10.000000 |
| F57                     | 10.000000 | F58                     | 10.000000 |
| F59                     | 10.000000 | F60                     | 10.000000 |
| F61                     | 10.000000 | F62                     | 10.000000 |
| F63                     | 10.000000 | F64                     | 10.000000 |
| F65                     | 10.000000 | F66                     | 10.000000 |
| F67                     | 10.000000 | F68                     | 10.000000 |
| F69                     | 10.000000 | F70                     | 10.000000 |
| F71                     | 10.000000 | F72                     | 10.000000 |
| F73                     | 10.000000 | F74                     | 10.000000 |
| F75                     | 10.000000 | F76                     | 10.000000 |
| F77                     | 10.000000 | F78                     | 10.000000 |
| F79                     | 10.000000 | F80                     | 10.000000 |
| F81                     | 10.000000 | F82                     | 10.000000 |
| F83                     | 10.000000 | F84                     | 10.000000 |
| F85                     | 10.000000 | F86                     | 10.000000 |
| F87                     | 10.000000 | F88                     | 10.000000 |
| F89                     | 10.000000 | F90                     | 10.000000 |
| F91                     | 10.000000 | F92                     | 10.000000 |
| F93                     | 10.000000 | F94                     | 10.000000 |
| F95                     | 10.000000 | F96                     | 10.000000 |
| F97                     | 10.000000 | F98                     | 10.000000 |
| F99                     | 10.000000 | F100                    | 10.000000 |
| F101                    | 10.000000 | F102                    | 10.000000 |
| F103                    | 10.000000 | F104                    | 10.000000 |
| F105                    | 10.000000 | F106                    | 10.000000 |
| F107                    | 10.000000 | F108                    | 10.000000 |
| F109                    | 10.000000 | F110                    | 10.000000 |
| F111                    | 10.000000 | F112                    | 10.000000 |
| F113                    | 10.000000 | F114                    | 10.000000 |
| F115                    | 10.000000 | F116                    | 10.000000 |
| F117                    | 10.000000 | F118                    | 10.000000 |
| F119                    | 10.000000 | F120                    | 10.000000 |
| F121                    | 10.000000 | F122                    | 10.000000 |
| F123                    | 10.000000 | F124                    | 10.000000 |
| F125                    | 10.000000 | F126                    | 10.000000 |
| F127                    | 10.000000 | F128                    | 10.000000 |
| F129                    | 10.000000 | F130                    | 10.000000 |
| F131                    | 10.000000 | F132                    | 10.000000 |
| F133                    | 10.000000 | F134                    | 10.000000 |
| F135                    | 10.000000 | F136                    | 10.000000 |
| F137                    | 10.000000 | F138                    | 10.000000 |
| F139                    | 10.000000 | F140                    | 10.000000 |
| F141                    | 10.000000 | F142                    | 10.000000 |
| F143                    | 10.000000 | F144                    | 10.000000 |
| F145                    | 10.000000 | F146                    | 10.000000 |
| F147                    | 10.000000 | F148                    | 10.000000 |
| F149                    | 10.000000 | F15                     |           |

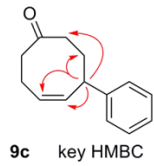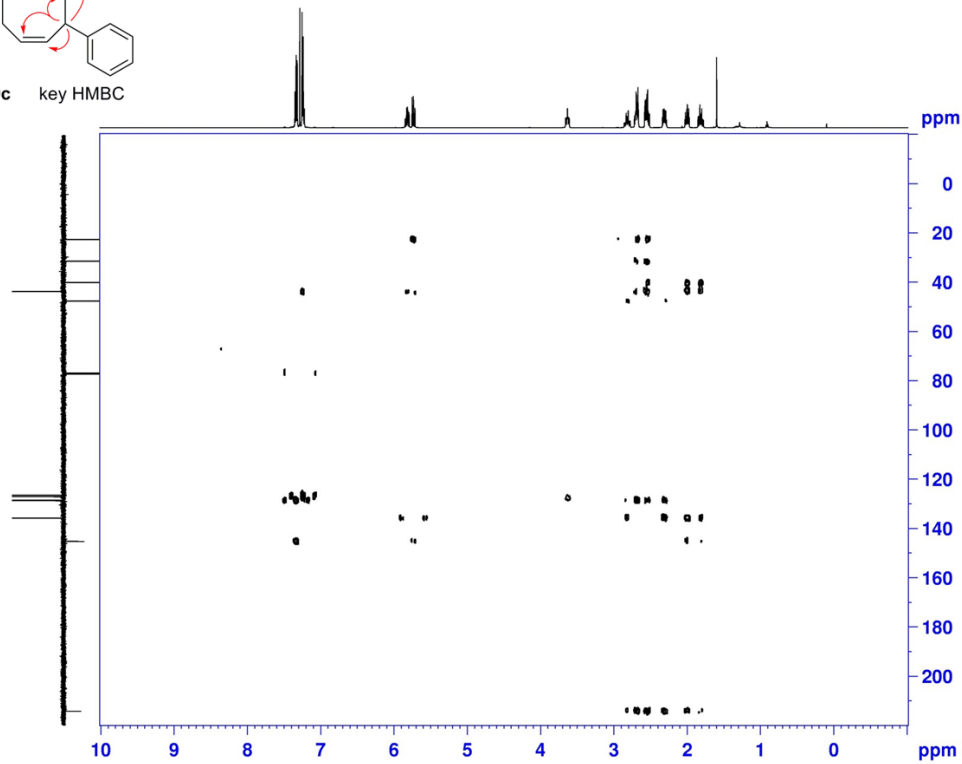

Current Data Parameters  
NAME CRA-03-230-02  
EXPNO 1  
PROCNO 1

F2 - Acquisition Parameters  
Date\_ 20120801  
Time 18.25  
INSTRUM spect  
PROBHD 5 mm PABBO 400  
PULPROG zgpg30  
TD 65536  
SOLVENT DMSO  
DS 2  
DE 1518.744 Hz  
F2FREQ 125.76184 MHz  
AQ 0.7712476 sec  
RG 32768  
WDW EM  
SS 4.00 usec  
LB 200.00 Hz  
GB 0  
PC 1.40  
CHRG1 145.0000000  
CHRG2 10.0000000  
CHRG3 1.0000000  
CHRG4 1.0000000  
CHRG5 1.0000000  
CHRG6 1.0000000  
CHRG7 1.0000000  
CHRG8 1.0000000  
CHRG9 1.0000000  
CHRG10 1.0000000  
CHRG11 1.0000000  
CHRG12 1.0000000  
CHRG13 1.0000000  
CHRG14 1.0000000  
CHRG15 1.0000000  
CHRG16 1.0000000  
CHRG17 1.0000000  
CHRG18 1.0000000  
CHRG19 1.0000000  
CHRG20 1.0000000  
CHRG21 1.0000000  
CHRG22 1.0000000  
CHRG23 1.0000000  
CHRG24 1.0000000  
CHRG25 1.0000000  
CHRG26 1.0000000  
CHRG27 1.0000000  
CHRG28 1.0000000  
CHRG29 1.0000000  
CHRG30 1.0000000  
CHRG31 1.0000000  
CHRG32 1.0000000  
CHRG33 1.0000000  
CHRG34 1.0000000  
CHRG35 1.0000000  
CHRG36 1.0000000  
CHRG37 1.0000000  
CHRG38 1.0000000  
CHRG39 1.0000000  
CHRG40 1.0000000  
CHRG41 1.0000000  
CHRG42 1.0000000  
CHRG43 1.0000000  
CHRG44 1.0000000  
CHRG45 1.0000000  
CHRG46 1.0000000  
CHRG47 1.0000000  
CHRG48 1.0000000  
CHRG49 1.0000000  
CHRG50 1.0000000  
CHRG51 1.0000000  
CHRG52 1.0000000  
CHRG53 1.0000000  
CHRG54 1.0000000  
CHRG55 1.0000000  
CHRG56 1.0000000  
CHRG57 1.0000000  
CHRG58 1.0000000  
CHRG59 1.0000000  
CHRG60 1.0000000  
CHRG61 1.0000000  
CHRG62 1.0000000  
CHRG63 1.0000000  
CHRG64 1.0000000  
CHRG65 1.0000000  
CHRG66 1.0000000  
CHRG67 1.0000000  
CHRG68 1.0000000  
CHRG69 1.0000000  
CHRG70 1.0000000  
CHRG71 1.0000000  
CHRG72 1.0000000  
CHRG73 1.0000000  
CHRG74 1.0000000  
CHRG75 1.0000000  
CHRG76 1.0000000  
CHRG77 1.0000000  
CHRG78 1.0000000  
CHRG79 1.0000000  
CHRG80 1.0000000  
CHRG81 1.0000000  
CHRG82 1.0000000  
CHRG83 1.0000000  
CHRG84 1.0000000  
CHRG85 1.0000000  
CHRG86 1.0000000  
CHRG87 1.0000000  
CHRG88 1.0000000  
CHRG89 1.0000000  
CHRG90 1.0000000  
CHRG91 1.0000000  
CHRG92 1.0000000  
CHRG93 1.0000000  
CHRG94 1.0000000  
CHRG95 1.0000000  
CHRG96 1.0000000  
CHRG97 1.0000000  
CHRG98 1.0000000  
CHRG99 1.0000000  
CHRG100 1.0000000

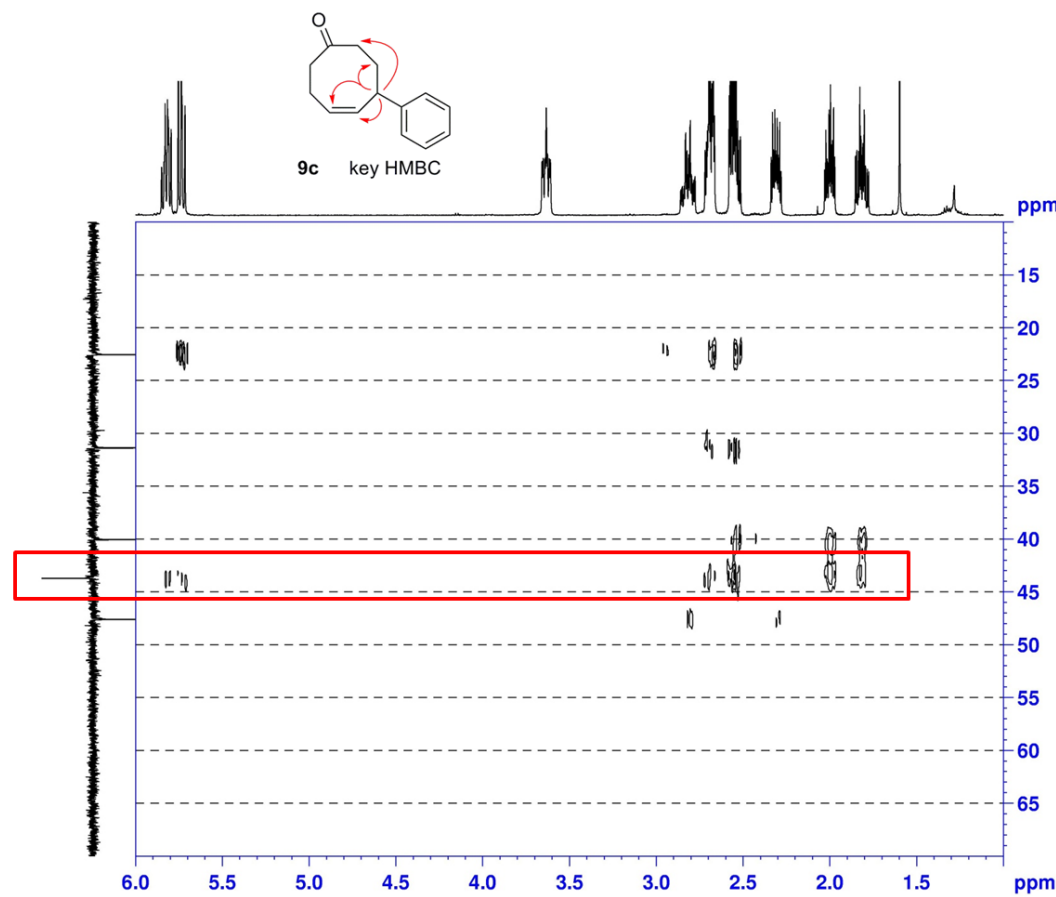

Current Data Parameters  
NAME CRA-03-230-02  
EXPNO 1  
PROCNO 1

F2 - Acquisition Parameters  
Date\_ 20120801  
Time 18.25  
INSTRUM spect  
PROBHD 5 mm PABBO 400  
PULPROG zgpg30  
TD 65536  
SOLVENT DMSO  
DS 2  
DE 1518.744 Hz  
F2FREQ 125.76184 MHz  
AQ 0.7712476 sec  
RG 32768  
WDW EM  
SS 4.00 usec  
LB 200.00 Hz  
GB 0  
PC 1.40  
CHRG1 145.0000000  
CHRG2 10.0000000  
CHRG3 1.0000000  
CHRG4 1.0000000  
CHRG5 1.0000000  
CHRG6 1.0000000  
CHRG7 1.0000000  
CHRG8 1.0000000  
CHRG9 1.0000000  
CHRG10 1.0000000  
CHRG11 1.0000000  
CHRG12 1.0000000  
CHRG13 1.0000000  
CHRG14 1.0000000  
CHRG15 1.0000000  
CHRG16 1.0000000  
CHRG17 1.0000000  
CHRG18 1.0000000  
CHRG19 1.0000000  
CHRG20 1.0000000  
CHRG21 1.0000000  
CHRG22 1.0000000  
CHRG23 1.0000000  
CHRG24 1.0000000  
CHRG25 1.0000000  
CHRG26 1.0000000  
CHRG27 1.0000000  
CHRG28 1.0000000  
CHRG29 1.0000000  
CHRG30 1.0000000  
CHRG31 1.0000000  
CHRG32 1.0000000  
CHRG33 1.0000000  
CHRG34 1.0000000  
CHRG35 1.0000000  
CHRG36 1.0000000  
CHRG37 1.0000000  
CHRG38 1.0000000  
CHRG39 1.0000000  
CHRG40 1.0000000  
CHRG41 1.0000000  
CHRG42 1.0000000  
CHRG43 1.0000000  
CHRG44 1.0000000  
CHRG45 1.0000000  
CHRG46 1.0000000  
CHRG47 1.0000000  
CHRG48 1.0000000  
CHRG49 1.0000000  
CHRG50 1.0000000  
CHRG51 1.0000000  
CHRG52 1.0000000  
CHRG53 1.0000000  
CHRG54 1.0000000  
CHRG55 1.0000000  
CHRG56 1.0000000  
CHRG57 1.0000000  
CHRG58 1.0000000  
CHRG59 1.0000000  
CHRG60 1.0000000  
CHRG61 1.0000000  
CHRG62 1.0000000  
CHRG63 1.0000000  
CHRG64 1.0000000  
CHRG65 1.0000000  
CHRG66 1.0000000  
CHRG67 1.0000000  
CHRG68 1.0000000  
CHRG69 1.0000000  
CHRG70 1.0000000  
CHRG71 1.0000000  
CHRG72 1.0000000  
CHRG73 1.0000000  
CHRG74 1.0000000  
CHRG75 1.0000000  
CHRG76 1.0000000  
CHRG77 1.0000000  
CHRG78 1.0000000  
CHRG79 1.0000000  
CHRG80 1.0000000  
CHRG81 1.0000000  
CHRG82 1.0000000  
CHRG83 1.0000000  
CHRG84 1.0000000  
CHRG85 1.0000000  
CHRG86 1.0000000  
CHRG87 1.0000000  
CHRG88 1.0000000  
CHRG89 1.0000000  
CHRG90 1.0000000  
CHRG91 1.0000000  
CHRG92 1.0000000  
CHRG93 1.0000000  
CHRG94 1.0000000  
CHRG95 1.0000000  
CHRG96 1.0000000  
CHRG97 1.0000000  
CHRG98 1.0000000  
CHRG99 1.0000000  
CHRG100 1.0000000

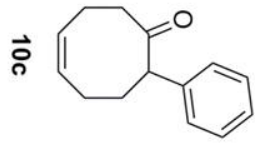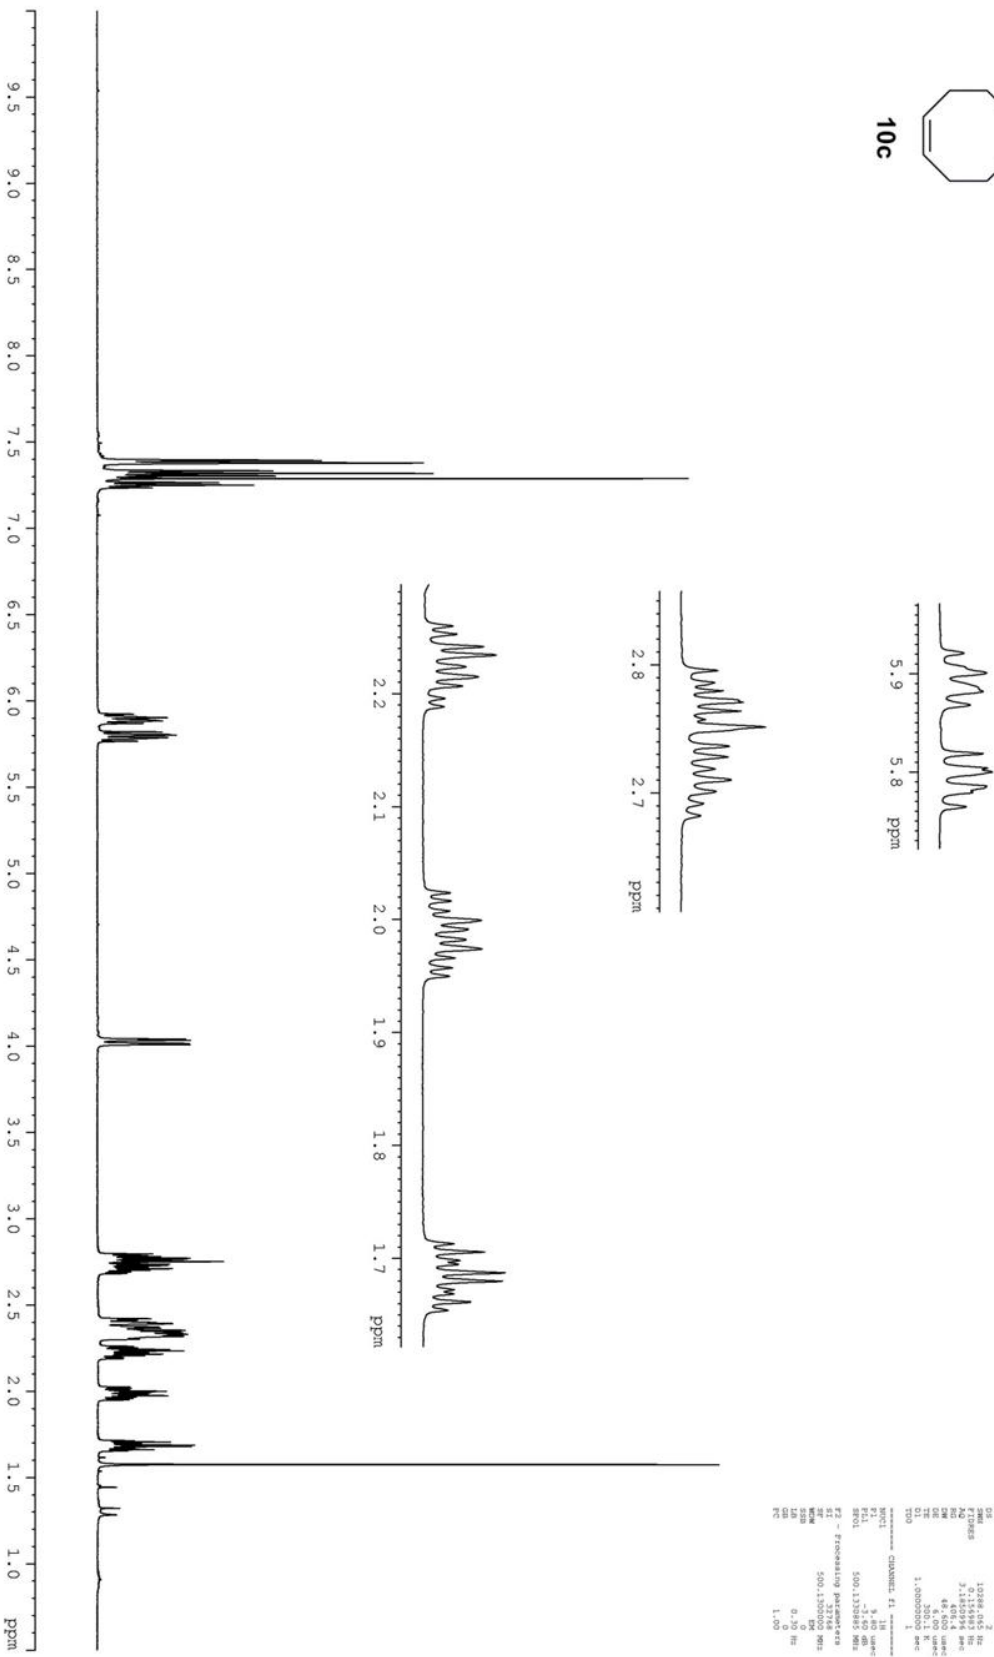

Current Data Parameters  
EXPNO 1  
PROCNO 1  
F2 - Acquisition Parameters  
Date\_ 20150727  
Time 20.15  
INSTRUM spect  
PROBHD 5 mm PABBO-BB-1  
PULPROG zgpg30  
TD 65536  
SFO 500.136098  
AQ 1.8  
RG 327.5  
SD 1.8  
SOLVENT CDCl3  
FIDRES 1.0288-0.2 Hz  
AQRES 0.15989 Hz  
NUC1 13C  
NUC2 1H  
DE 4.00 Hz  
TE 300.2 K  
ZG 1.000000 Hz  
TD0 1  
===== CHANNEL f1 =====  
NUC1 13C  
P1 1.50  
PL1 0.00 dB  
FREQ1 500.136098 MHz  
===== CHANNEL f2 =====  
F2 - Processing parameters  
SI 32768  
SF 500.136098 MHz  
WDW EM  
SSB 0  
LB 0.10 Hz  
GB 0  
PC 1.00

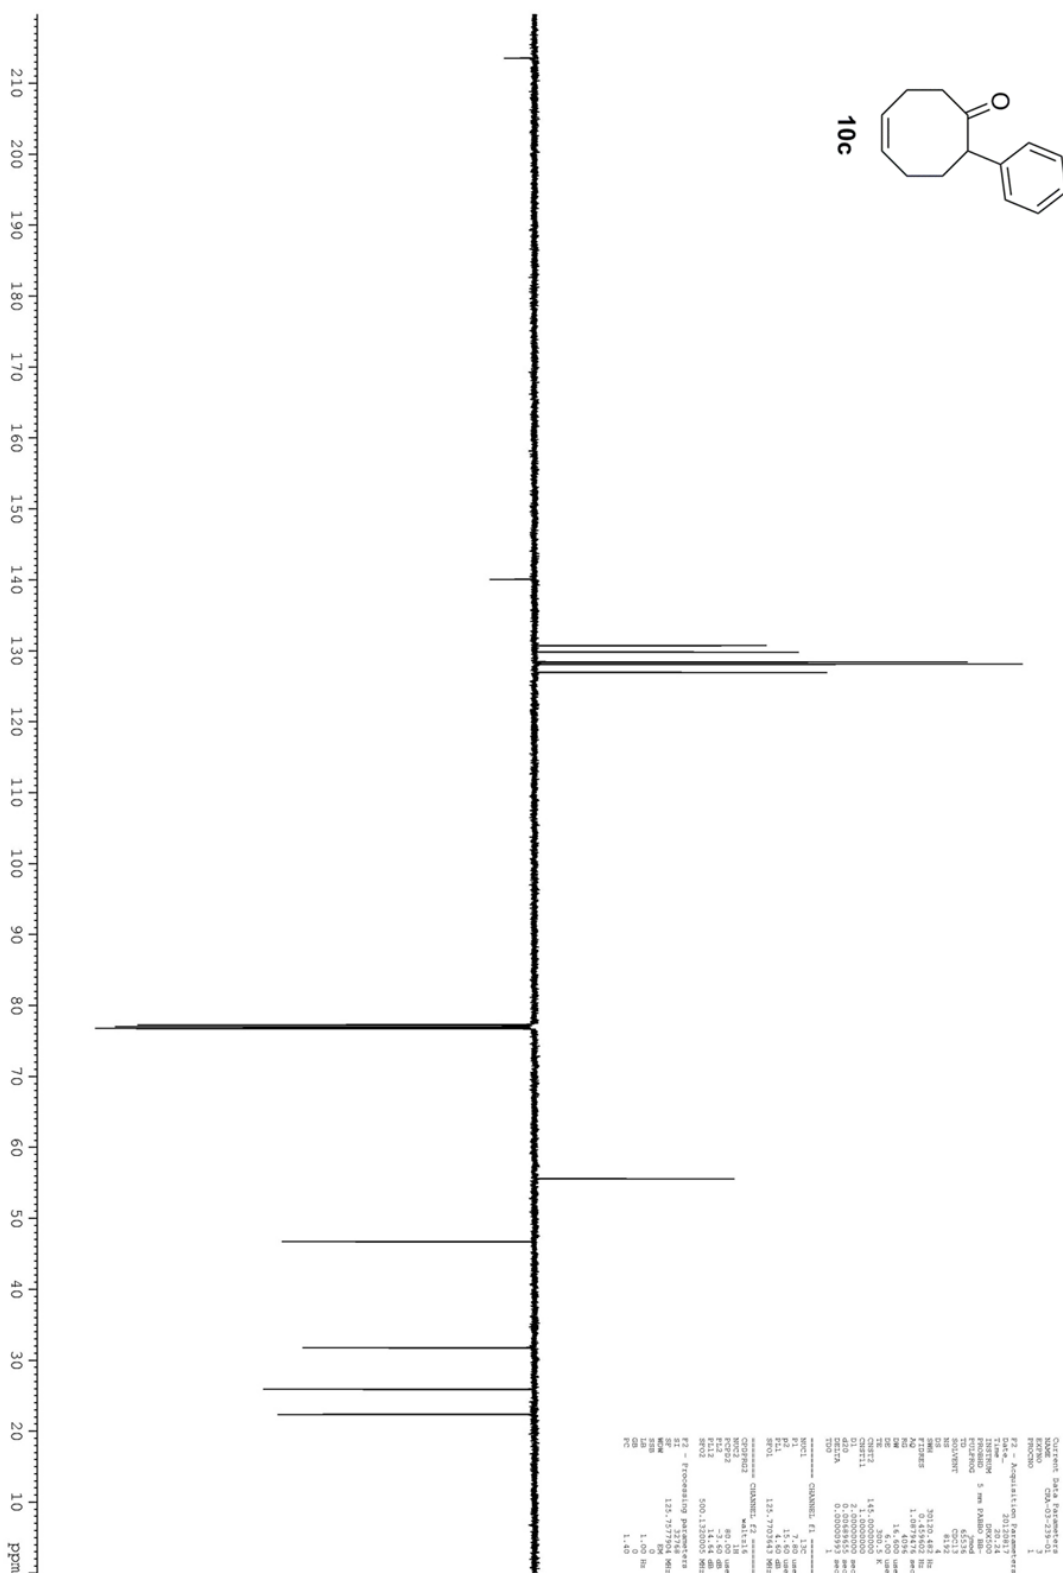



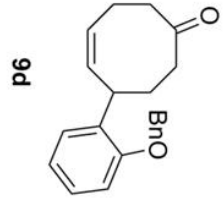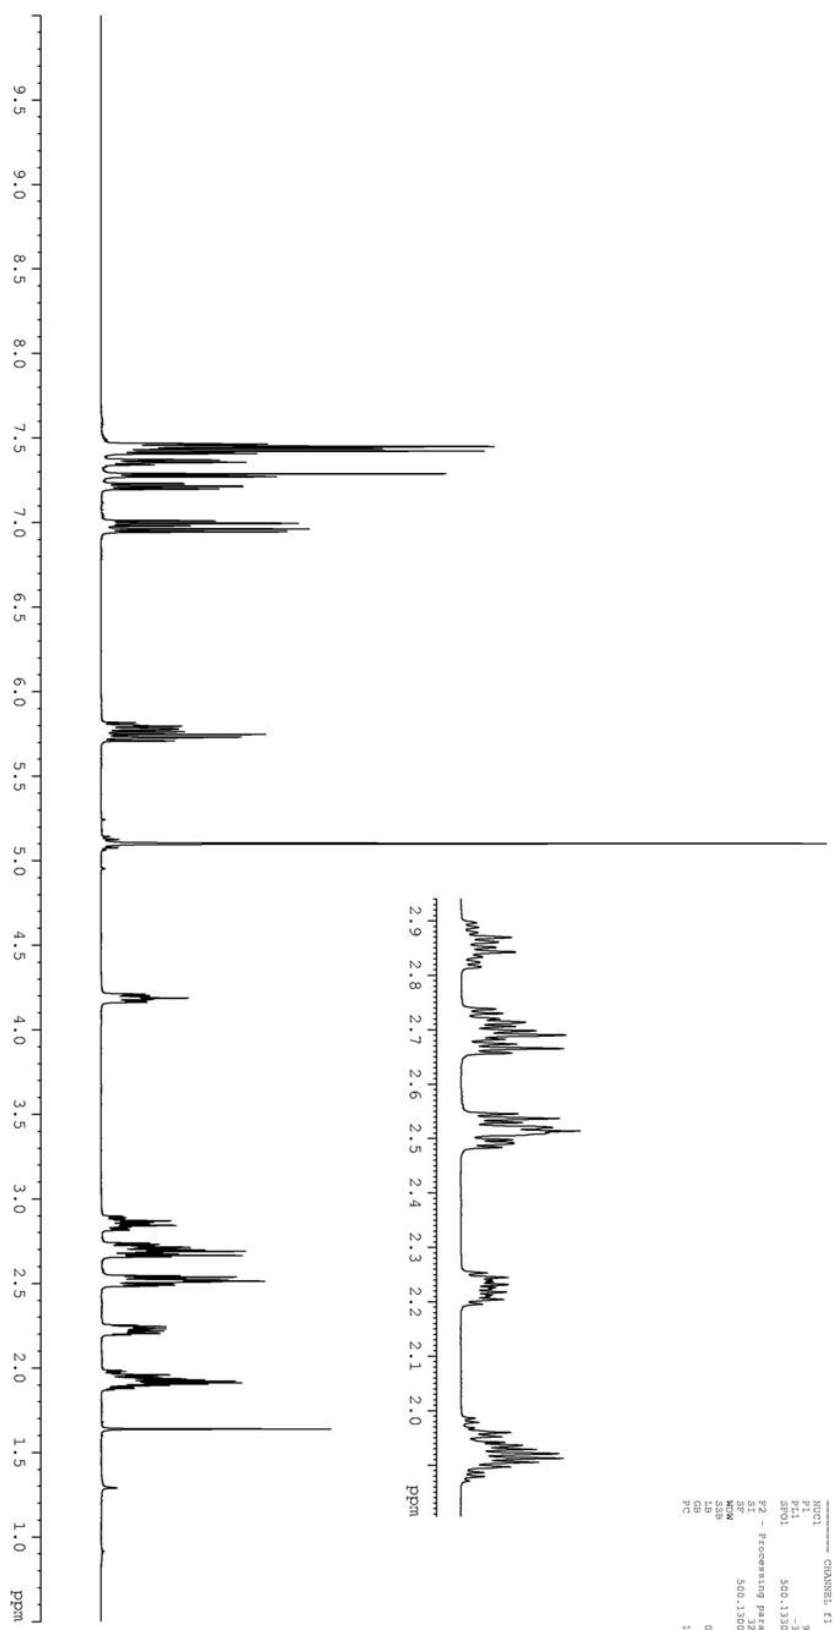

Current Data Parameters  
NAME: CPD-03-213-0  
EXPNO: 1  
PROCNO: 1  
F2 - Acquisition Parameters  
Date\_ : 09/28/2011  
Time: 9.40  
INSTRUM: spect  
PROBHD: 5 mm PABBO-1H  
PULPROG: zgpg30  
TD: 65536  
SOLVENT: CDCl3  
NS: 1  
DS: 4  
SWH: 10288.644  
FIDRES: 0.11698  
AQ: 3.185099  
RG: 48  
IN: 6.00  
DE: 2.00  
TE: 300.2  
TDO: 1.0000000  
----- CHANNEL f1 -----  
NUC1: 1H  
P1: 9.80  
PL1: -2.00  
SFO1: 500.130088  
F2 - Processing parameters  
SI: 32768  
SF: 500.1300001  
WDW: EM  
SSB: 0  
LB: 0.31  
GB: 0  
PC: 1.00

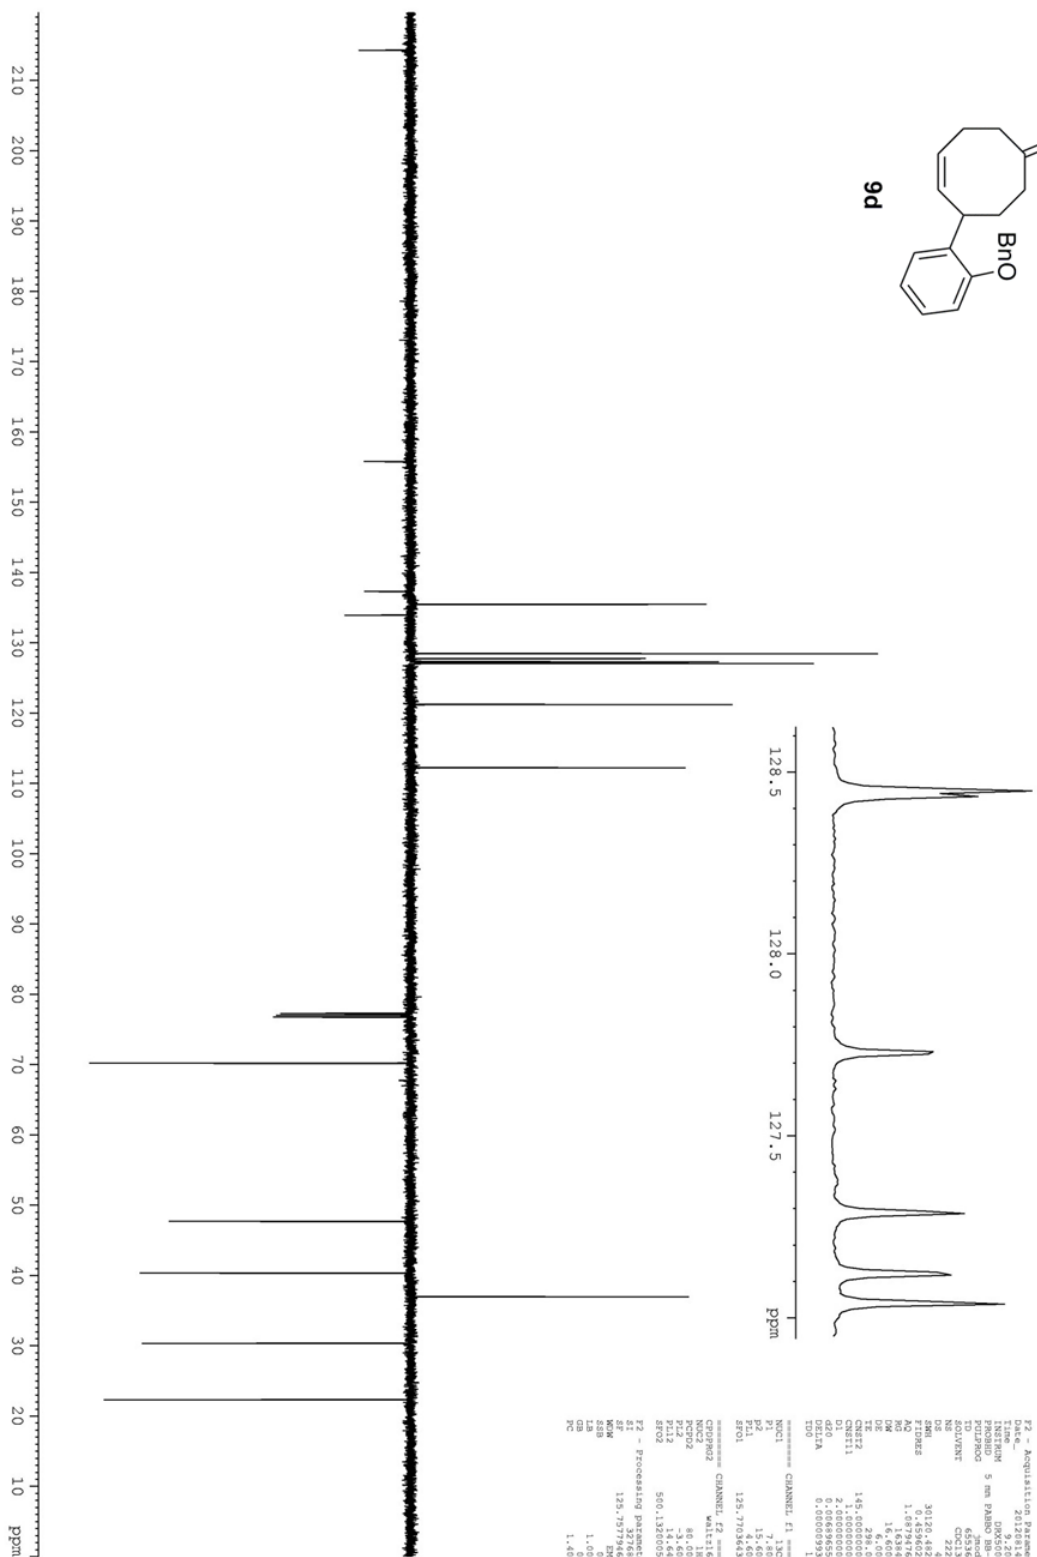





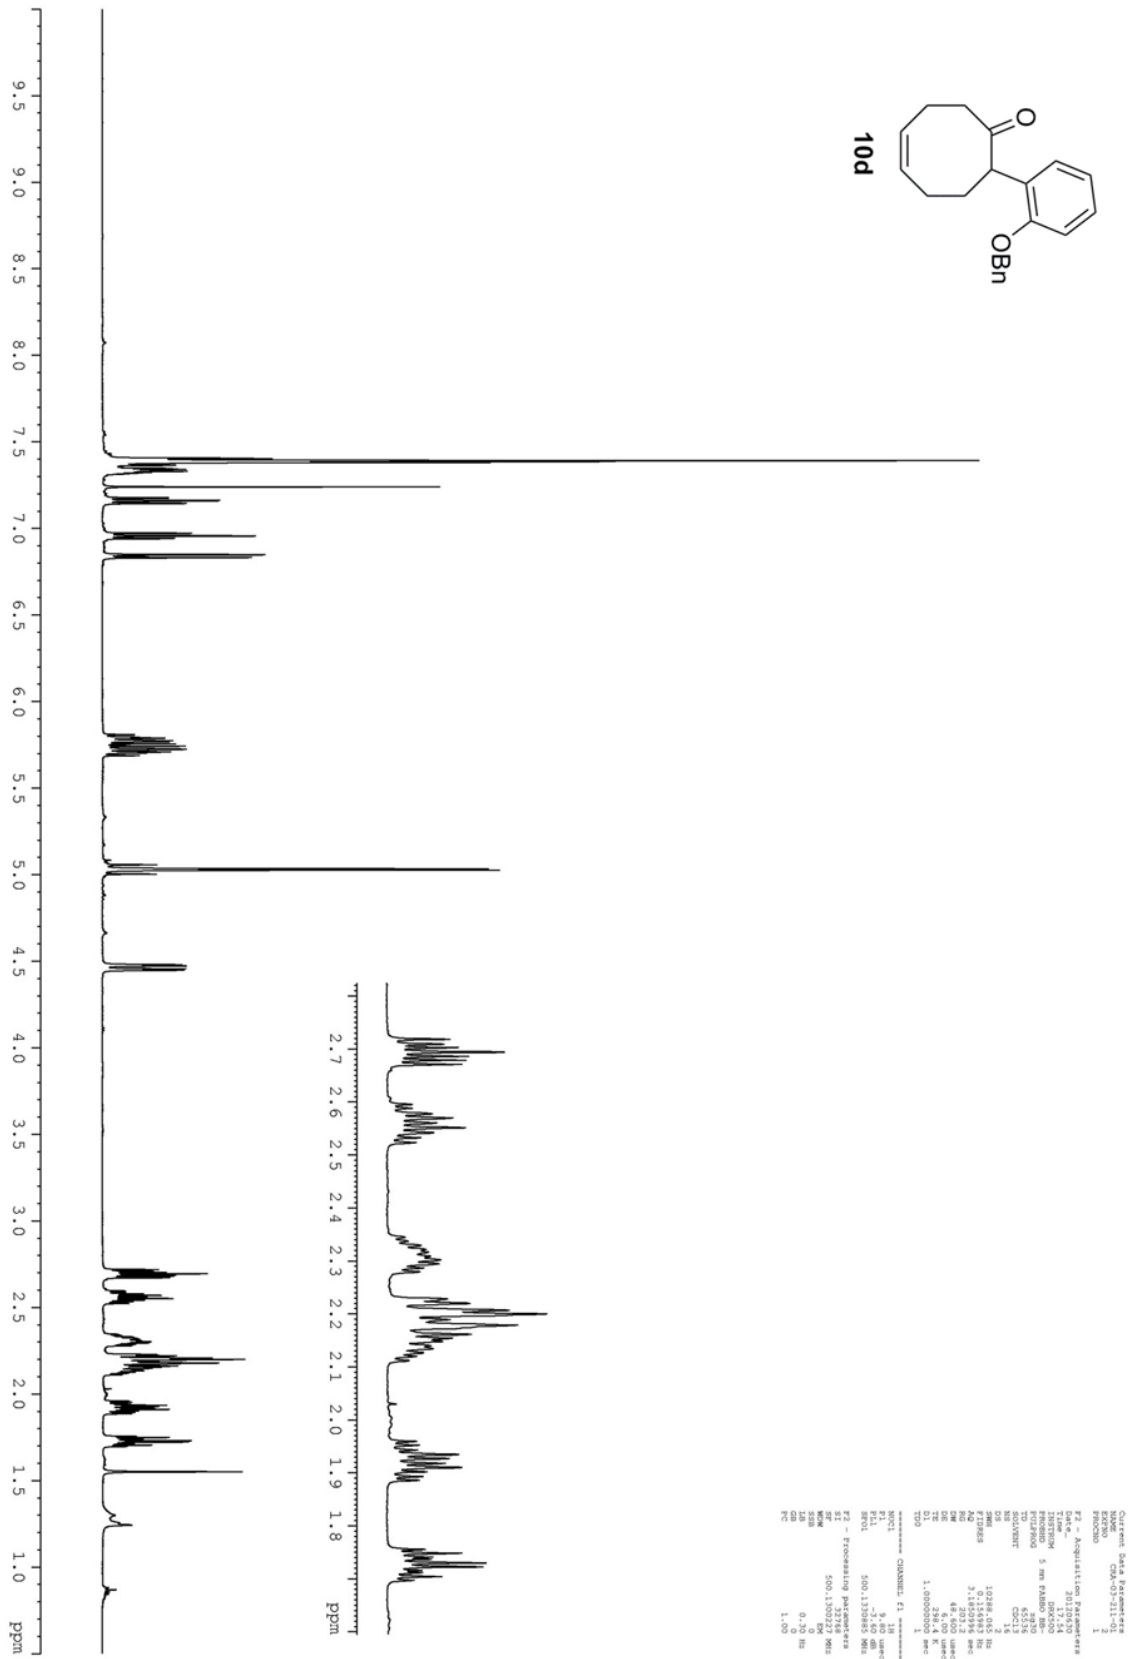

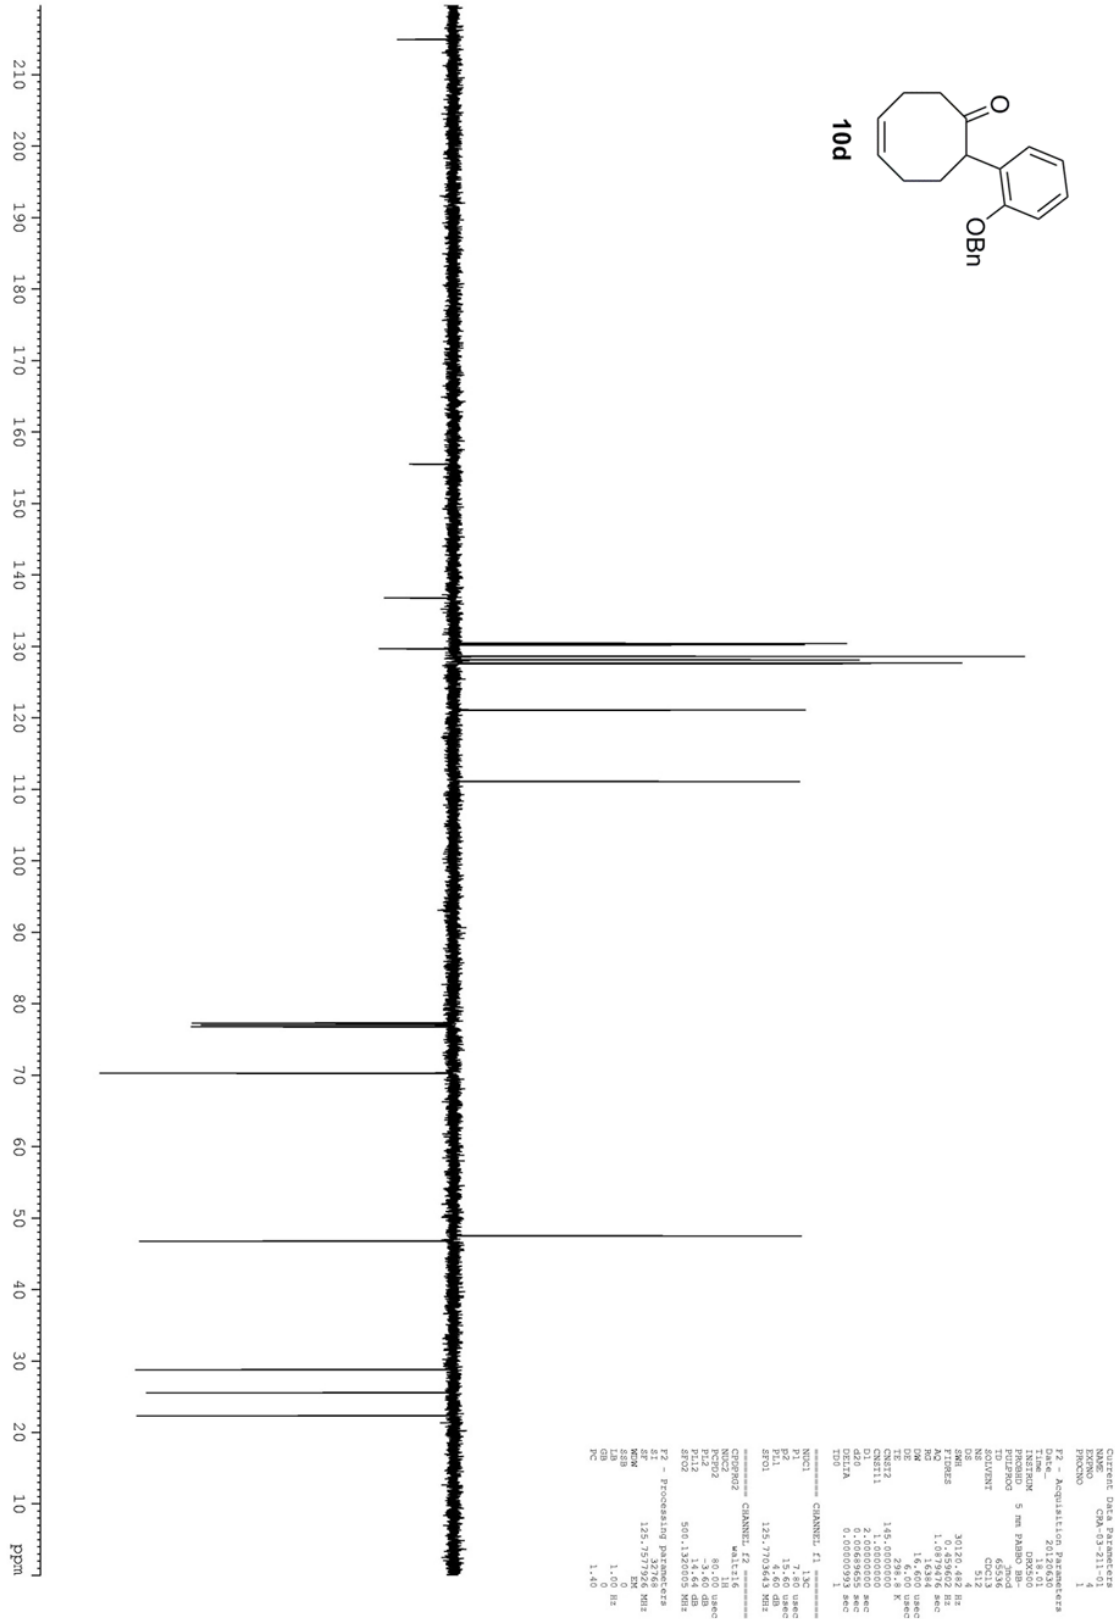

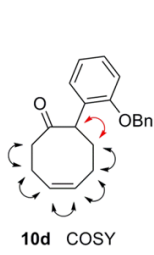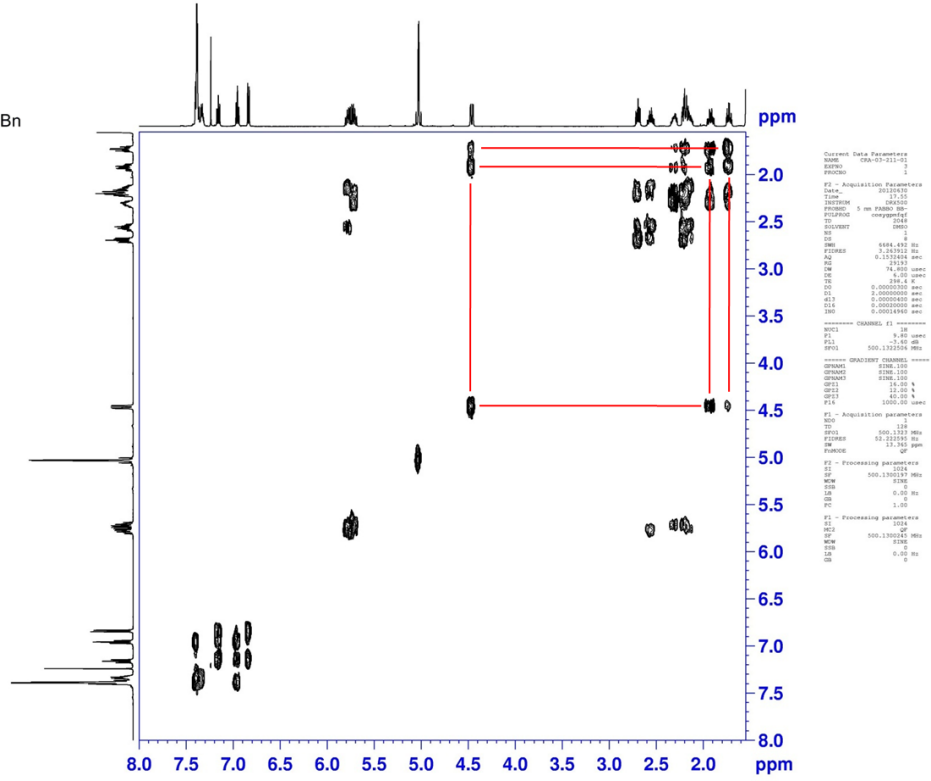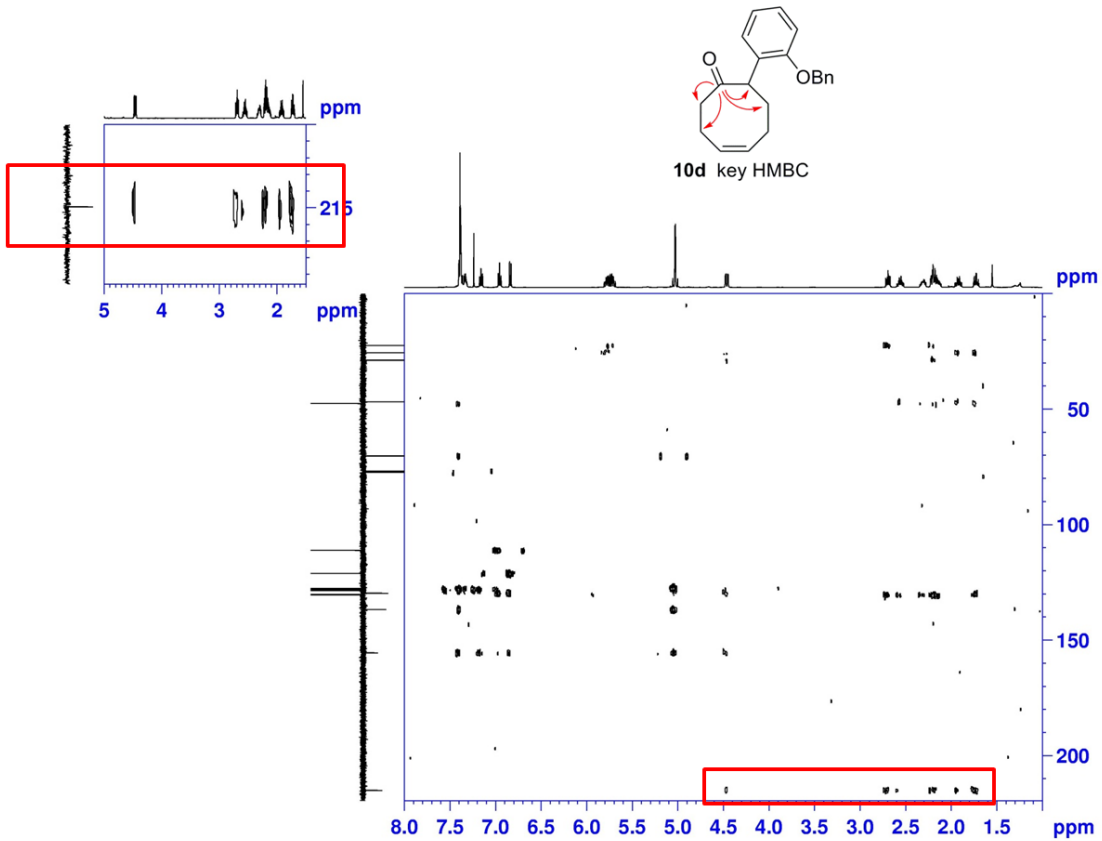

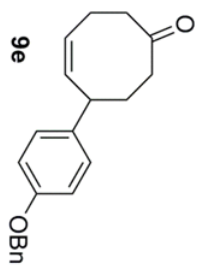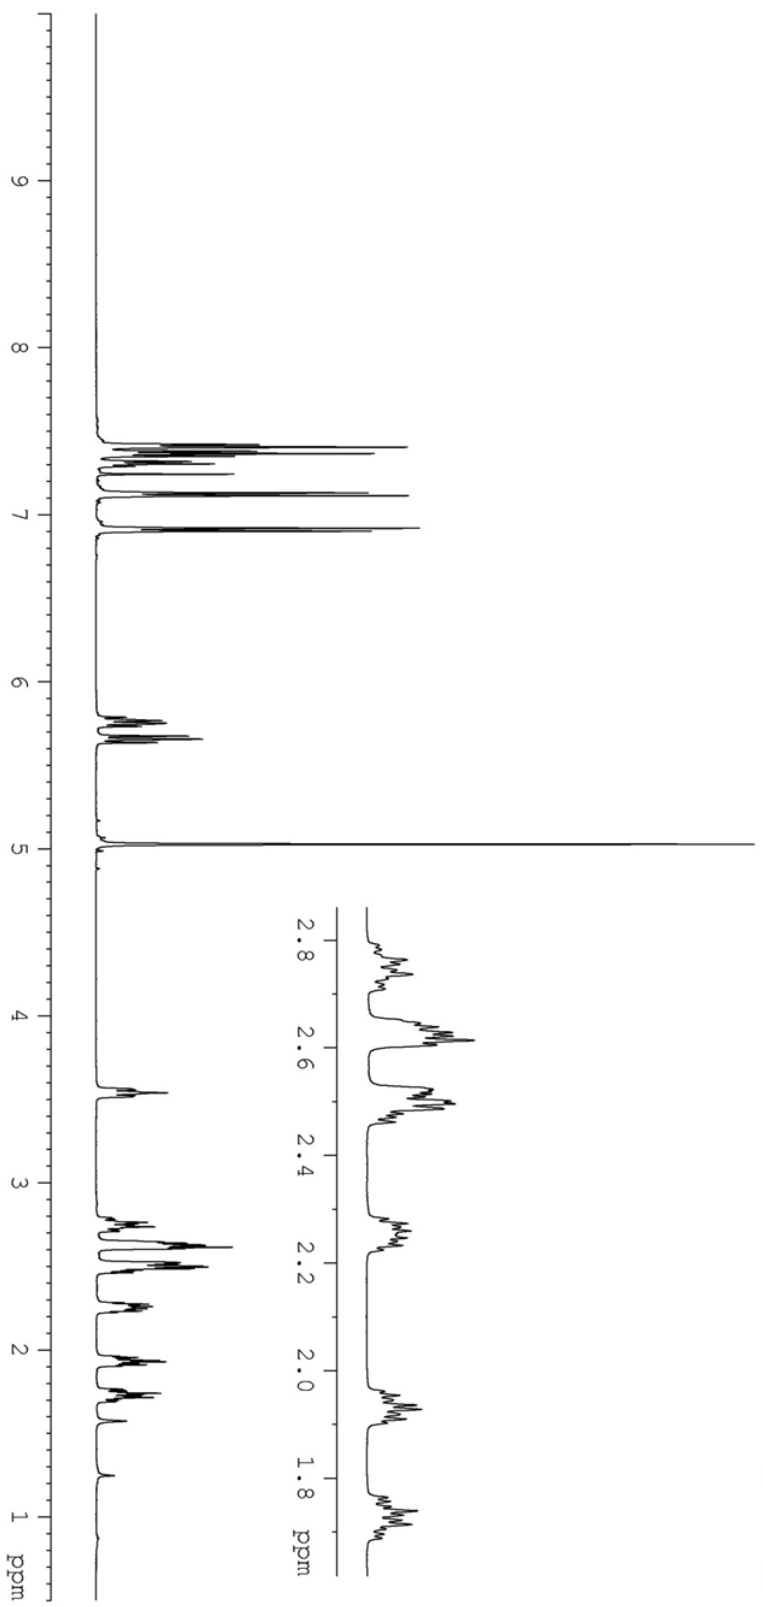

Sample: Data: 9e.ms  
NAME: 9e  
EXPNO: 1  
PROCNO: 1  
F2 - Acquisition Parameters  
Date\_ 20120224  
Time 14.56  
INSTRUM spect  
PROBHD 5 mm BBO-5  
PULPROG zgpg30  
TD 65536  
SOLVENT CDCl3  
NUC1 13C  
NUC2 1H  
AQ 10288.02 Hz  
RG 327.68  
AQ 0.158993 Hz  
RG 655.36  
FIDRES 0.14173 Hz  
DELTA 6.00 Hz  
DE 1.0000000 sec  
D1 1.0000000 sec  
D2  
===== CHANNEL f1 =====  
NUC1 13C1  
P1 18.00  
PL1 0.00  
FID1 560.131883 MHz  
P2 12.00  
PL2 0.00  
FID2 125.761170 MHz  
===== CHANNEL f2 =====  
NUC2 1H  
P1 12.00  
PL1 0.00  
FID1 500.136100 MHz  
===== CHANNEL f3 =====  
NUC3 1H  
P1 12.00  
PL1 0.00  
FID1 500.136100 MHz

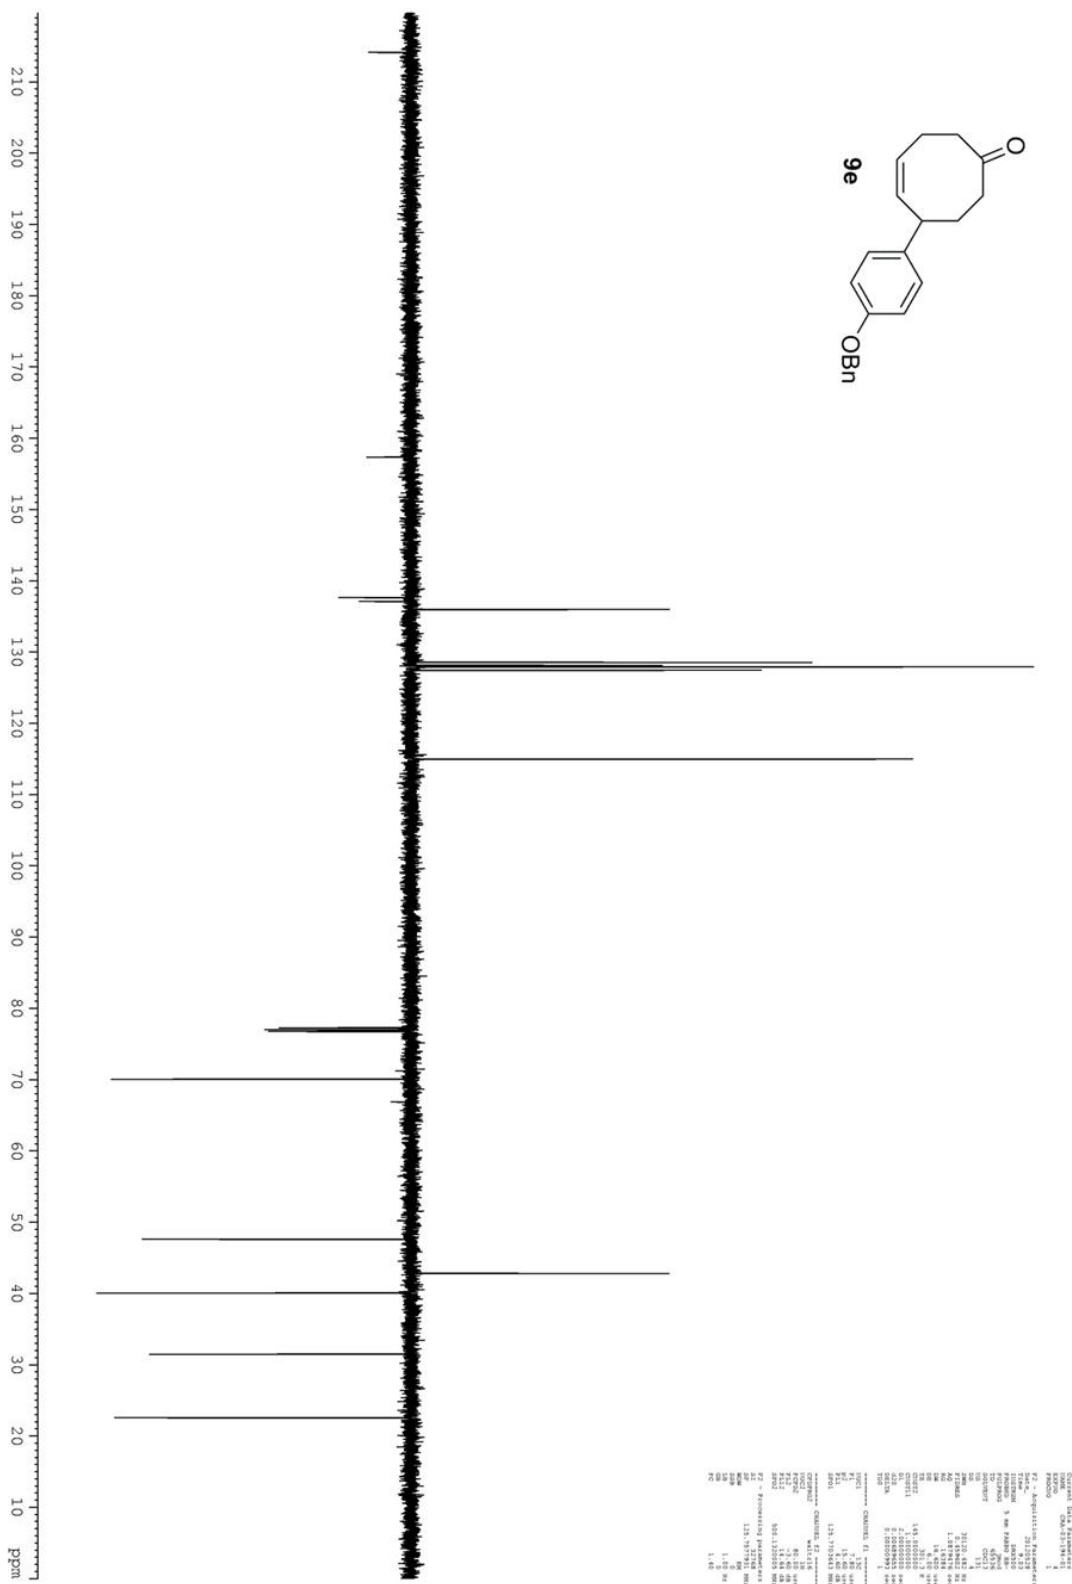

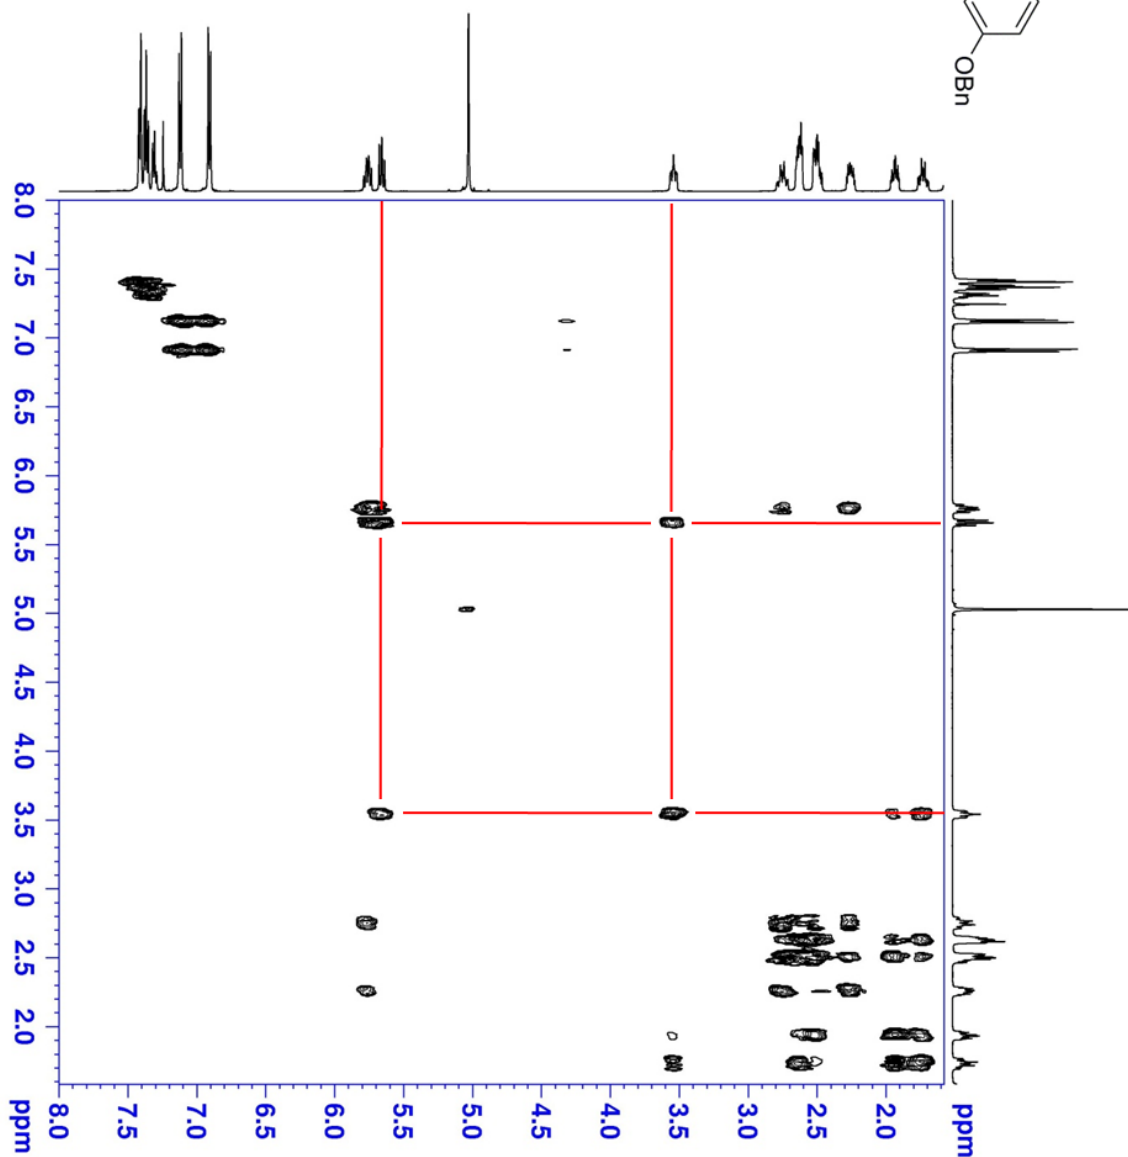[illegible]

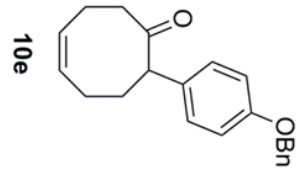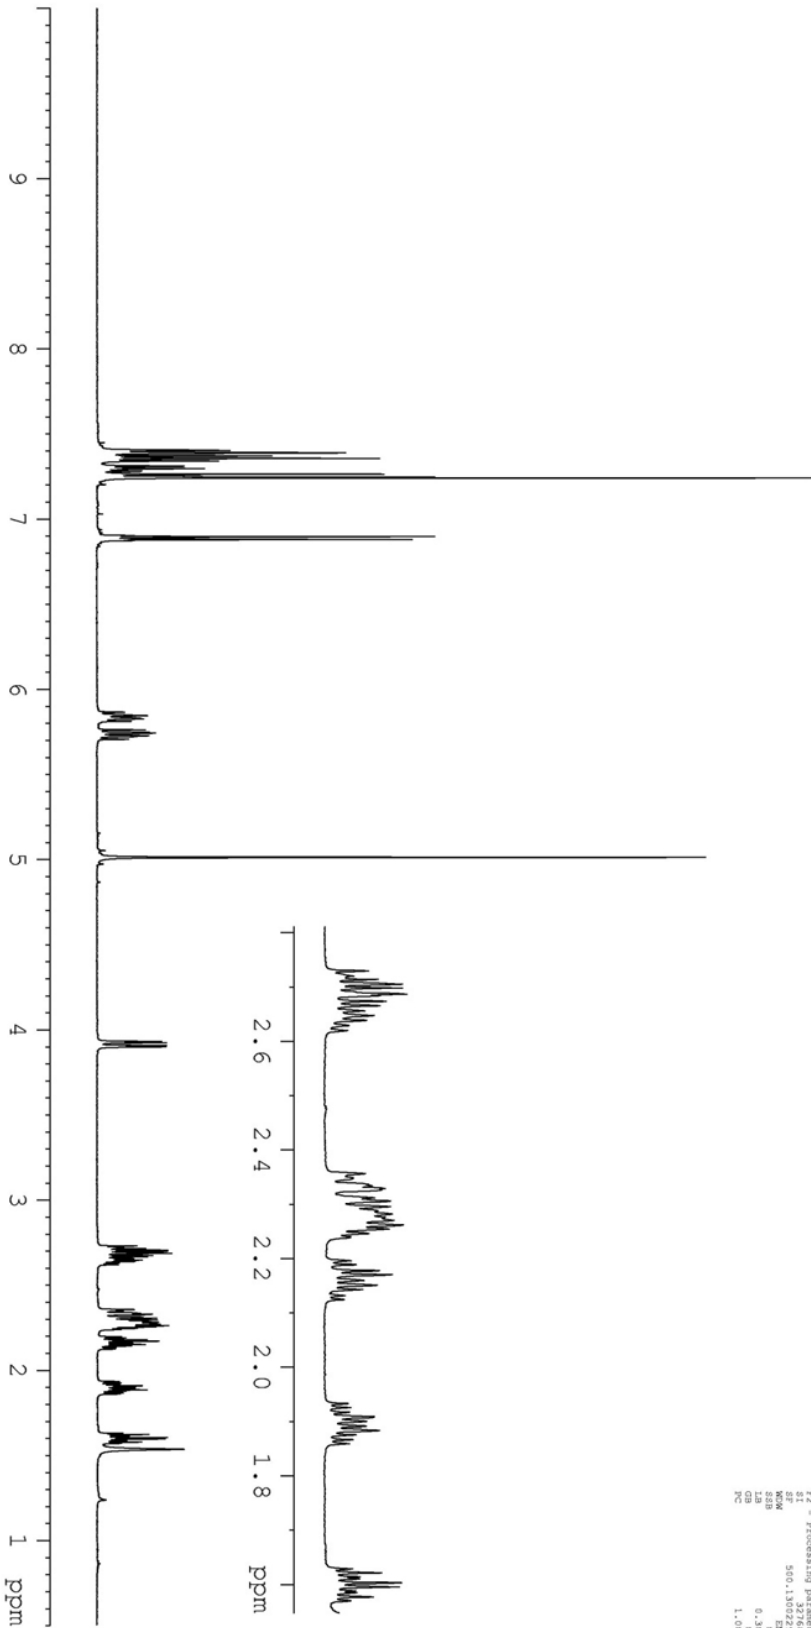

Current Data Parameters  
NAME: CMA-03-233-01  
EXPNO: 1  
PROCNO: 1  
F2 - Acquisition Parameters  
Date\_: 20120807  
Time: 10.00  
INSTRUM: spect  
PROBHD: 5 mm PABBO BB-  
PULPROG: zgpg30  
TD: 65536  
SOLVENT: CDCl3  
NS: 1024  
DS: 2  
SWH: 10245.465 Hz  
F2: 101.625400 MHz  
AQ: 3.1855996 sec  
RG: 327.66  
WM: 48.460 usec  
DE: 3.00  
TE: 300.2 K  
D1: 1.00000000 sec  
T0: 1  
===== CHANNEL f1 =====  
NUC1: 1H  
P1: 9.18 usec  
PL1: -3.40 dB  
SFO1: 500.1360885 MHz  
F2 - Processing parameters  
SI: 32768  
SF: 500.1360885 MHz  
WDW: EM  
SSB: 0  
GB: 0  
PC: 1.00



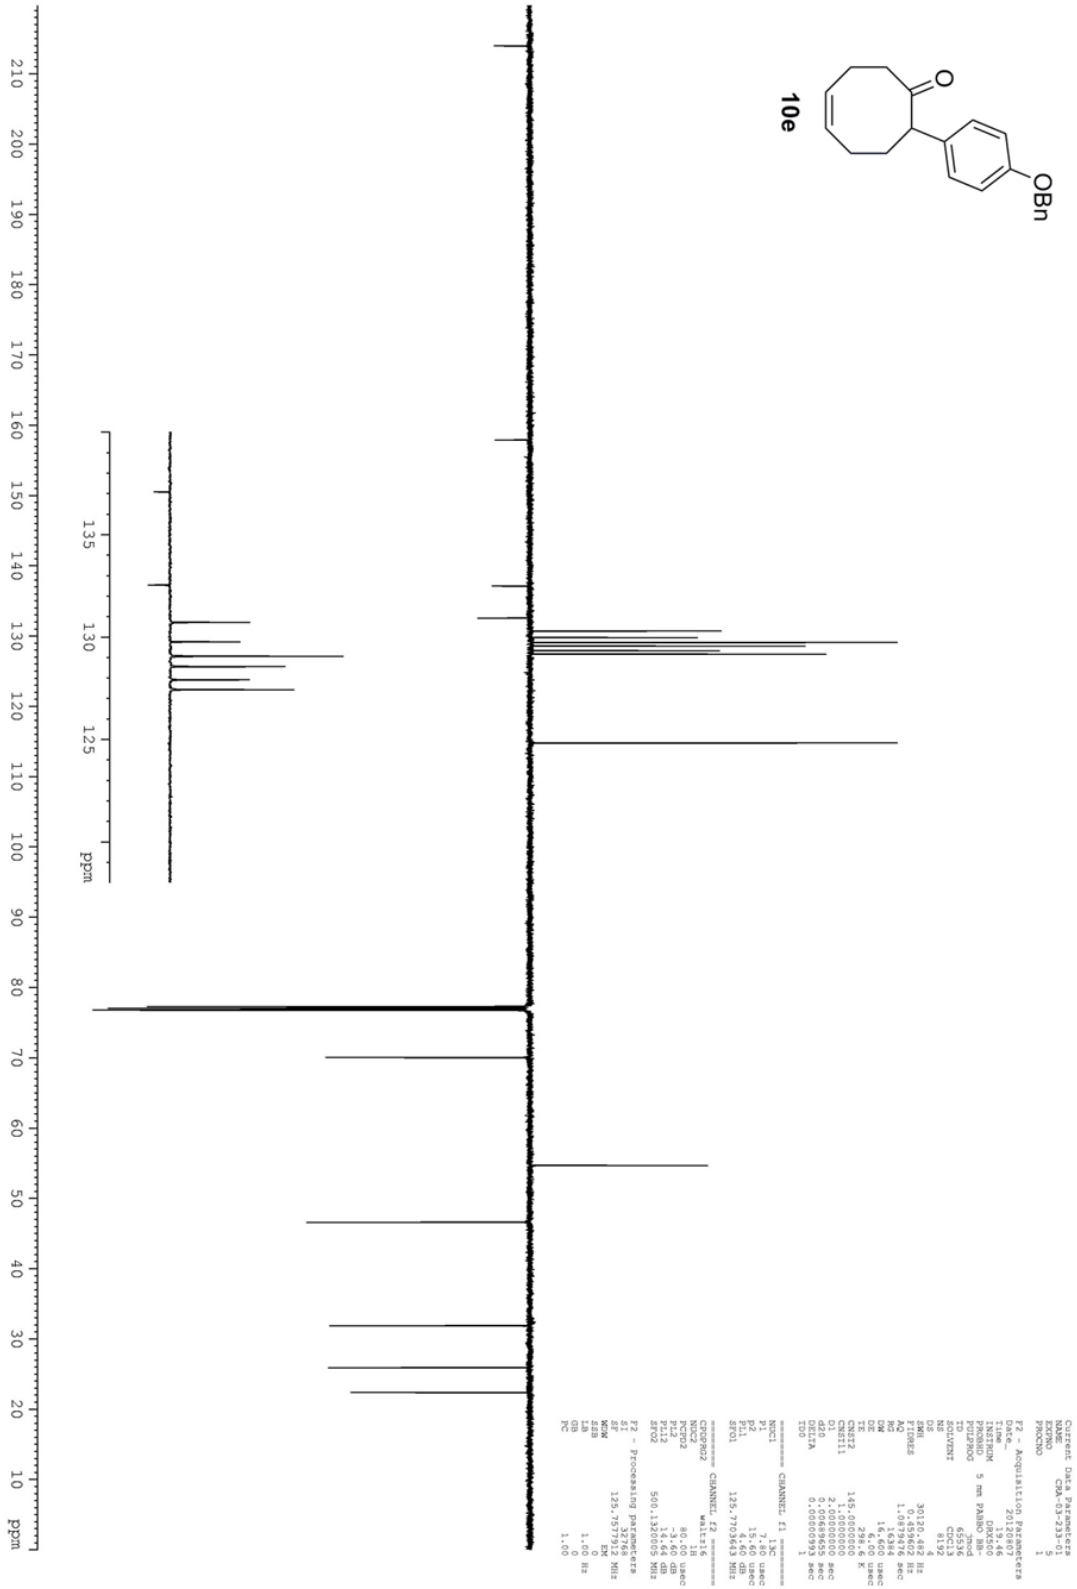

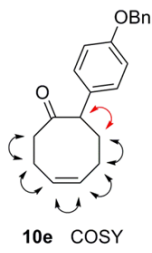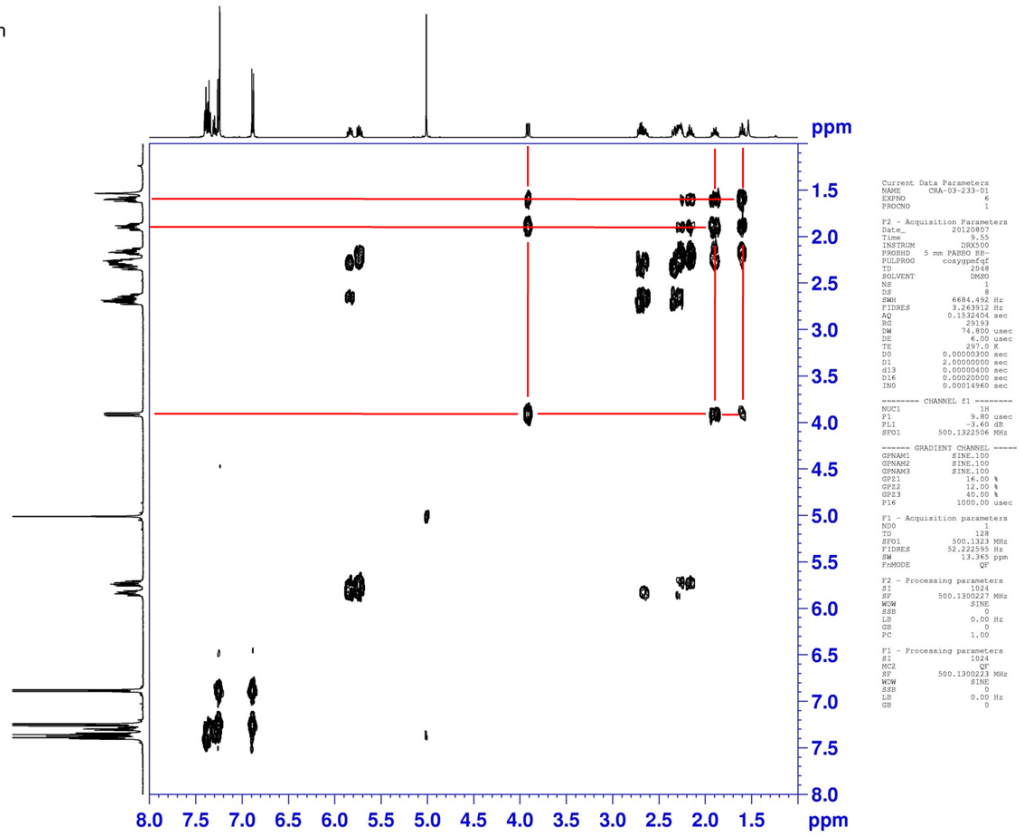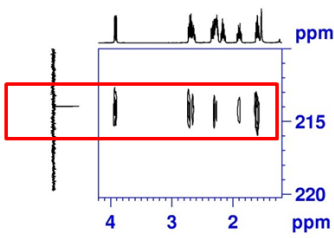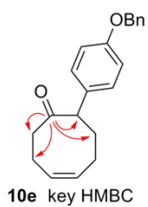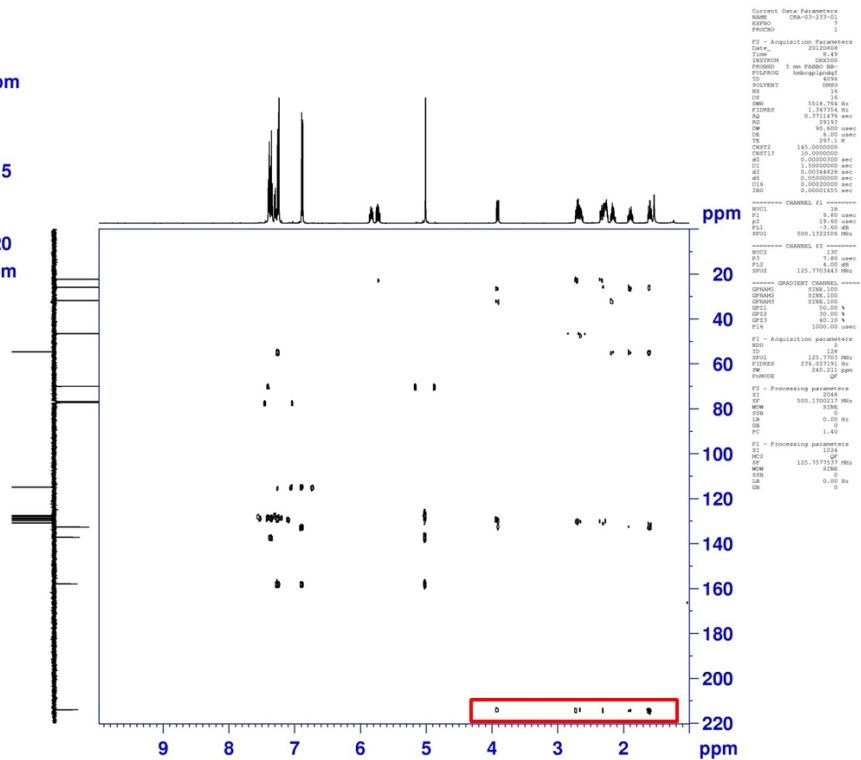

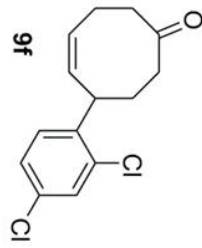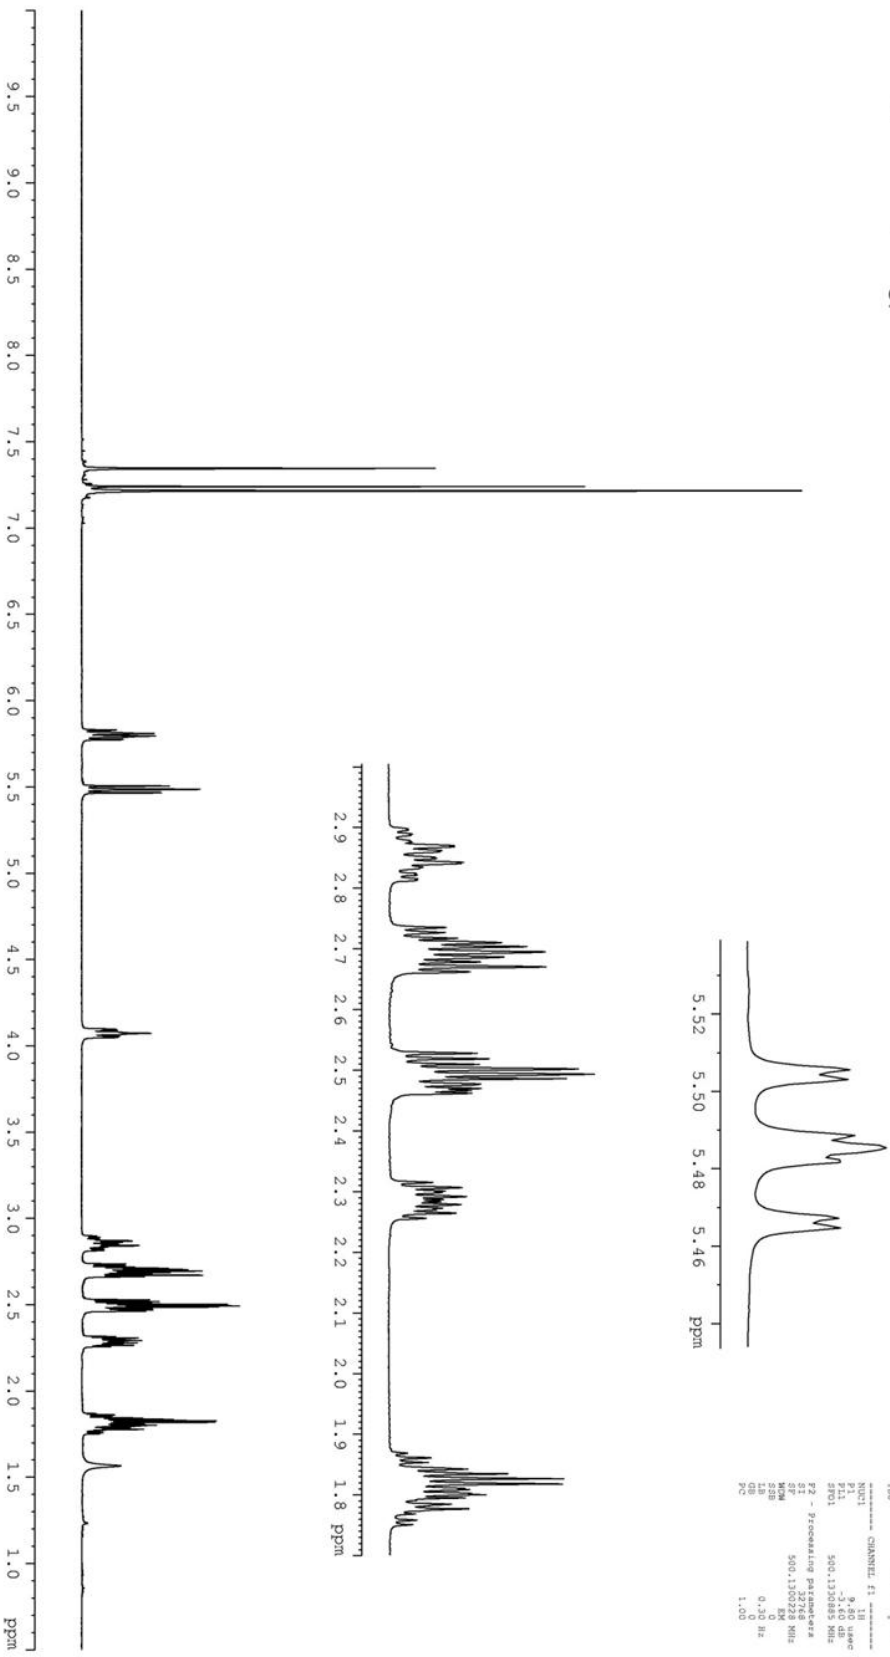

Current Data Parameters  
NAME CMA-03-235-01  
EXPNO 1  
PROCNO 2  
F2 - Acquisition Parameters  
Date\_ 20130809  
Time 13.25  
INSTRUM spect  
PROBHD 5 mm PABBO BB-  
PULPROG zgpg30  
TD 65536  
SOLVENT CDCl3  
DS 16  
SS 16  
SFO 10284.065 Hz  
AQ 2.6  
RG 320  
DE 4.00 usec  
TE 300.2 K  
D1 1.00000000 sec  
TDO 1  
===== CHANNEL f1 =====  
NUC1 1H  
P1 9.40 usec  
PL1 -1.40 dB  
FREQ1 500.130085 MHz  
F2 - Processing parameters  
SF 500.130028 MHz  
WDW EM  
SS 16  
LB 0.30 Hz  
GB 0  
PC 1.00

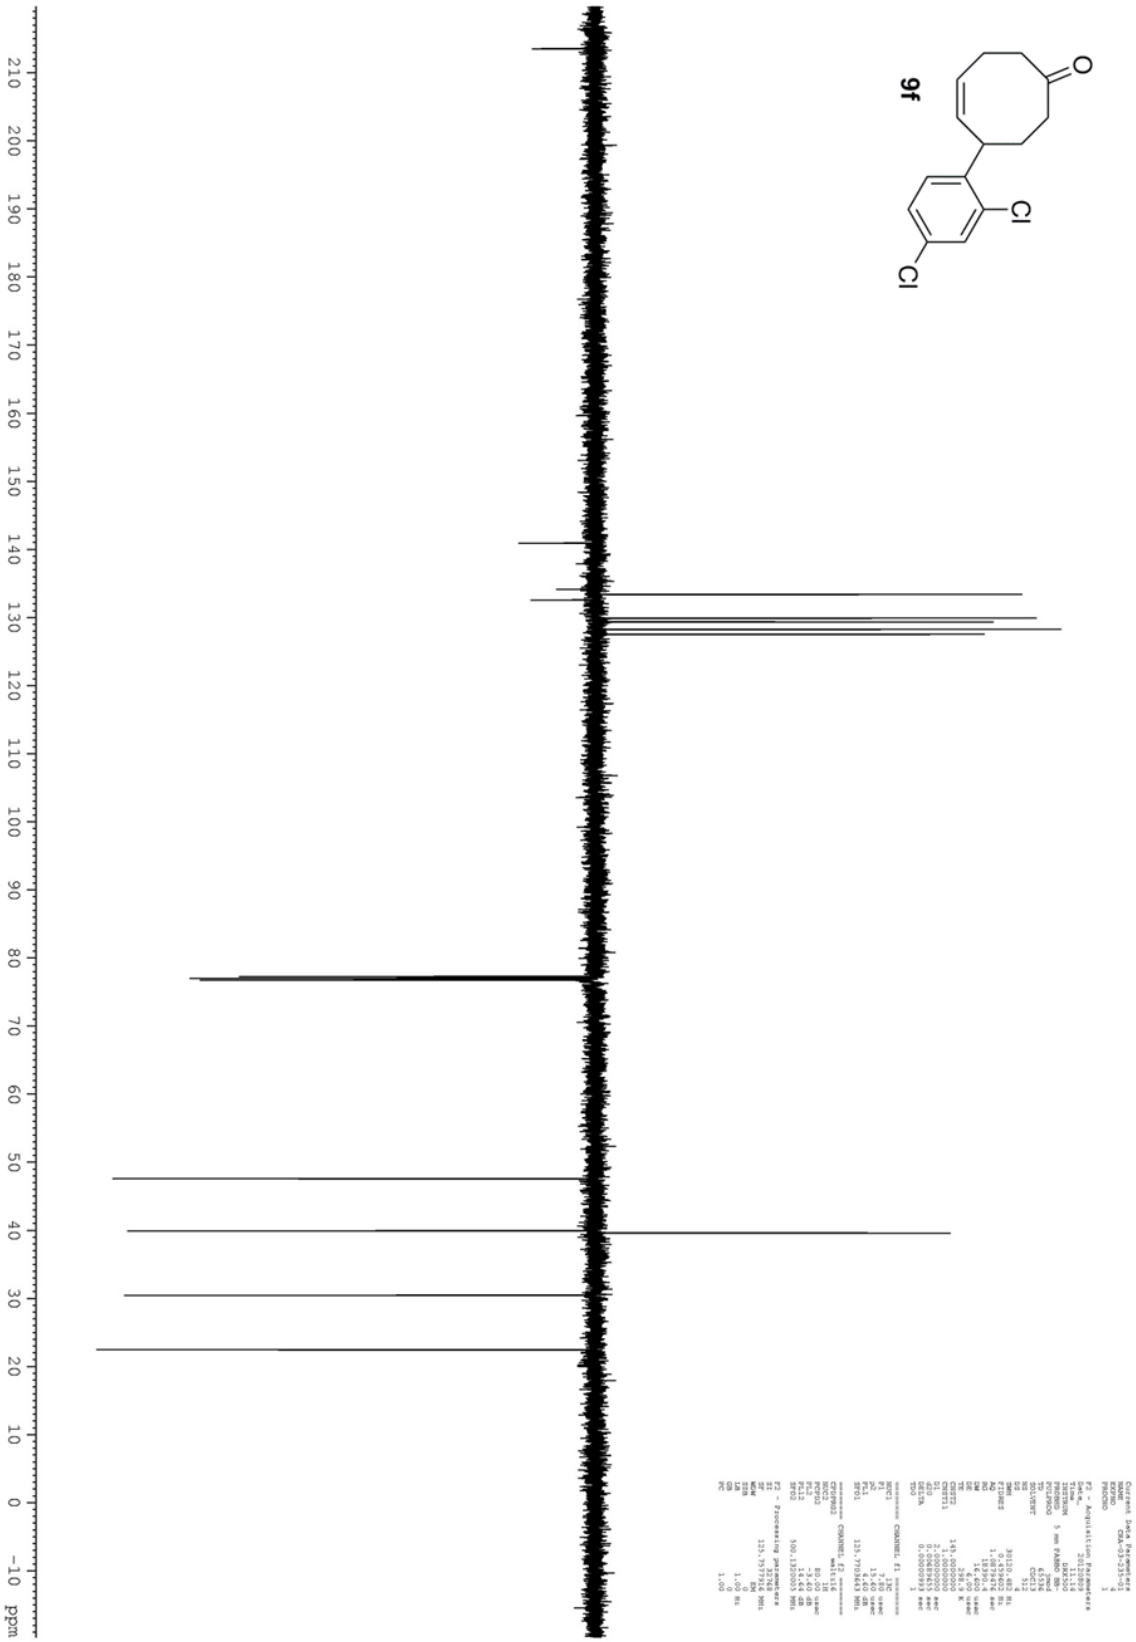

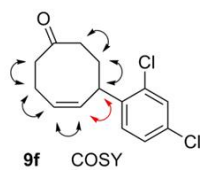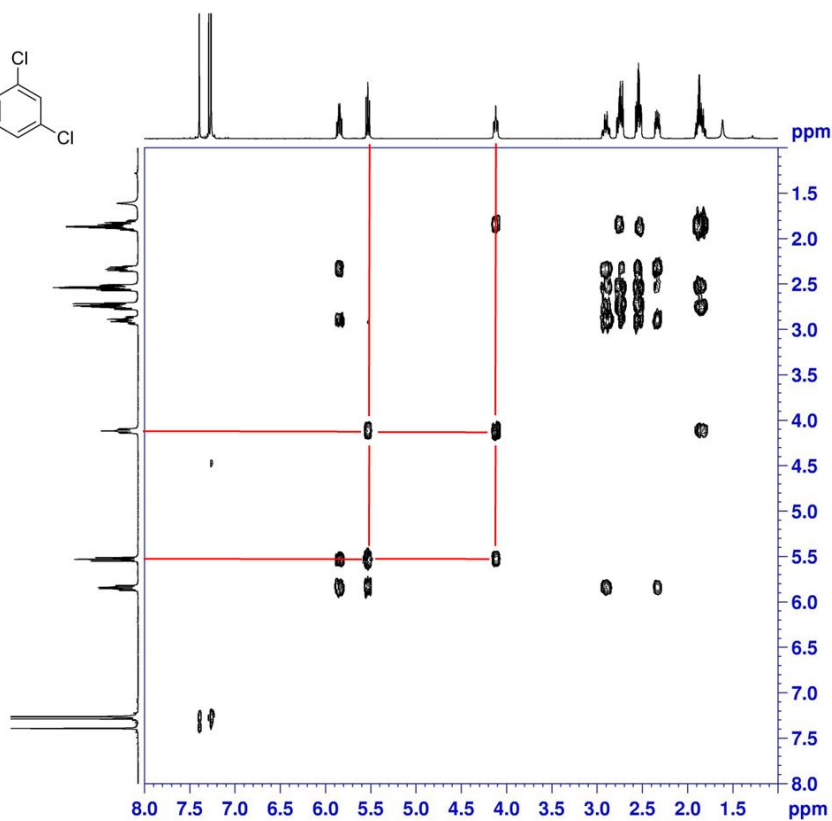

Current Data Parameters  
NAME: 09b-09-19-01  
EXPNO: 1  
PROCNO: 1

F2 - Acquisition Parameters  
Date\_: 201203  
Time: 12.11  
INSTRUM: spect  
PROBHD: 5 mm BBOBO-1H  
PULPROG: zgpg30  
TD: 65536  
SOLVENT: DMSO  
DS: 4  
SWH: 6064.161 Hz  
FIDRES: 0.121012 Hz  
AQ: 0.110164 sec  
RG: 1024  
WM: 74.400 usec  
WDW: EM  
SSB: 0.000000  
LB: 200.2 Hz  
GB: 0.000000000  
PC: 0.000000000  
SFO: 500.1362600 MHz  
D1: 0.000000000  
D15: 0.000000000  
D16: 0.000000000  
D17: 0.000000000

===== CHANNEL f1 =====  
NUC1: 13C  
P1: 12.00 usec  
PL1: 0.00 dB  
SFO1: 100.6261800 MHz

===== GRABBER CHANNEL =====  
OPBAND1: 125.010000 MHz  
OPBAND2: 125.010000 MHz  
OPBAND3: 125.010000 MHz  
SFO2: 500.1362600 MHz  
SFO3: 500.1362600 MHz  
SFO4: 500.1362600 MHz  
SFO5: 500.1362600 MHz  
SFO6: 500.1362600 MHz  
SFO7: 500.1362600 MHz  
SFO8: 500.1362600 MHz  
SFO9: 500.1362600 MHz  
SFO10: 500.1362600 MHz  
SFO11: 500.1362600 MHz  
SFO12: 500.1362600 MHz  
SFO13: 500.1362600 MHz  
SFO14: 500.1362600 MHz  
SFO15: 500.1362600 MHz  
SFO16: 500.1362600 MHz  
SFO17: 500.1362600 MHz  
SFO18: 500.1362600 MHz  
SFO19: 500.1362600 MHz  
SFO20: 500.1362600 MHz  
SFO21: 500.1362600 MHz  
SFO22: 500.1362600 MHz  
SFO23: 500.1362600 MHz  
SFO24: 500.1362600 MHz  
SFO25: 500.1362600 MHz  
SFO26: 500.1362600 MHz  
SFO27: 500.1362600 MHz  
SFO28: 500.1362600 MHz  
SFO29: 500.1362600 MHz  
SFO30: 500.1362600 MHz  
SFO31: 500.1362600 MHz  
SFO32: 500.1362600 MHz  
SFO33: 500.1362600 MHz  
SFO34: 500.1362600 MHz  
SFO35: 500.1362600 MHz  
SFO36: 500.1362600 MHz  
SFO37: 500.1362600 MHz  
SFO38: 500.1362600 MHz  
SFO39: 500.1362600 MHz  
SFO40: 500.1362600 MHz  
SFO41: 500.1362600 MHz  
SFO42: 500.1362600 MHz  
SFO43: 500.1362600 MHz  
SFO44: 500.1362600 MHz  
SFO45: 500.1362600 MHz  
SFO46: 500.1362600 MHz  
SFO47: 500.1362600 MHz  
SFO48: 500.1362600 MHz  
SFO49: 500.1362600 MHz  
SFO50: 500.1362600 MHz  
SFO51: 500.1362600 MHz  
SFO52: 500.1362600 MHz  
SFO53: 500.1362600 MHz  
SFO54: 500.1362600 MHz  
SFO55: 500.1362600 MHz  
SFO56: 500.1362600 MHz  
SFO57: 500.1362600 MHz  
SFO58: 500.1362600 MHz  
SFO59: 500.1362600 MHz  
SFO60: 500.1362600 MHz  
SFO61: 500.1362600 MHz  
SFO62: 500.1362600 MHz  
SFO63: 500.1362600 MHz  
SFO64: 500.1362600 MHz  
SFO65: 500.1362600 MHz  
SFO66: 500.1362600 MHz  
SFO67: 500.1362600 MHz  
SFO68: 500.1362600 MHz  
SFO69: 500.1362600 MHz  
SFO70: 500.1362600 MHz  
SFO71: 500.1362600 MHz  
SFO72: 500.1362600 MHz  
SFO73: 500.1362600 MHz  
SFO74: 500.1362600 MHz  
SFO75: 500.1362600 MHz  
SFO76: 500.1362600 MHz  
SFO77: 500.1362600 MHz  
SFO78: 500.1362600 MHz  
SFO79: 500.1362600 MHz  
SFO80: 500.1362600 MHz  
SFO81: 500.1362600 MHz  
SFO82: 500.1362600 MHz  
SFO83: 500.1362600 MHz  
SFO84: 500.1362600 MHz  
SFO85: 500.1362600 MHz  
SFO86: 500.1362600 MHz  
SFO87: 500.1362600 MHz  
SFO88: 500.1362600 MHz  
SFO89: 500.1362600 MHz  
SFO90: 500.1362600 MHz  
SFO91: 500.1362600 MHz  
SFO92: 500.1362600 MHz  
SFO93: 500.1362600 MHz  
SFO94: 500.1362600 MHz  
SFO95: 500.1362600 MHz  
SFO96: 500.1362600 MHz  
SFO97: 500.1362600 MHz  
SFO98: 500.1362600 MHz  
SFO99: 500.1362600 MHz  
SFO100: 500.1362600 MHz

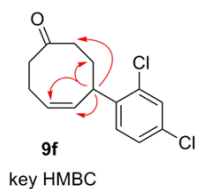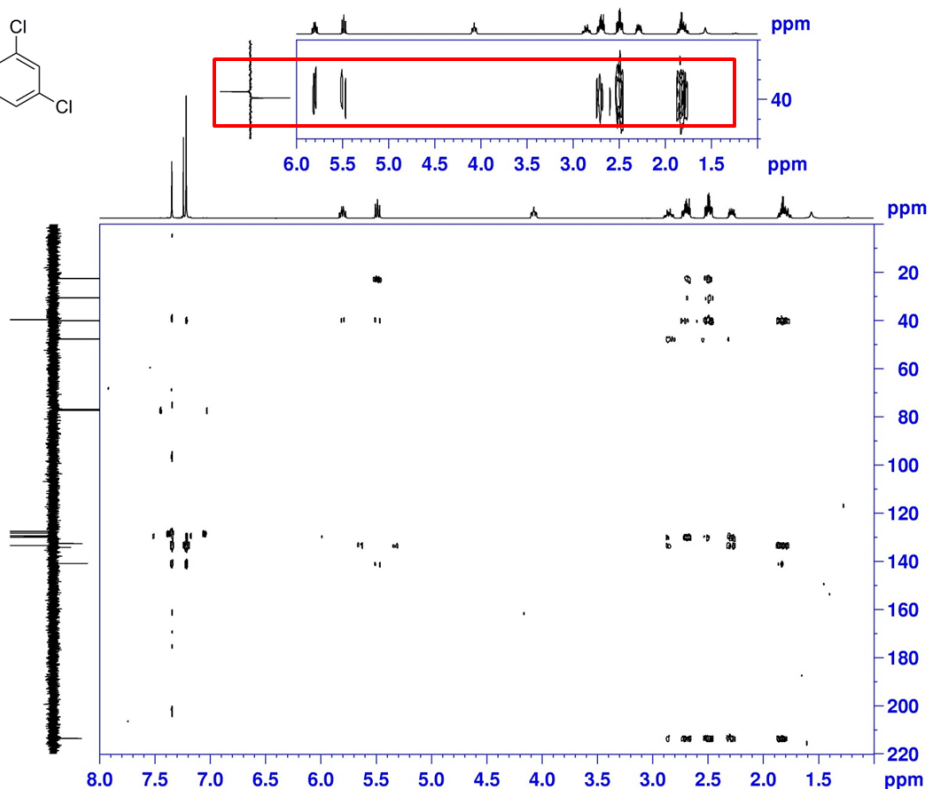

Current Data Parameters  
NAME: 09b-09-19-01  
EXPNO: 1  
PROCNO: 1

F2 - Acquisition Parameters  
Date\_: 201203  
Time: 12.11  
INSTRUM: spect  
PROBHD: 5 mm BBOBO-1H  
PULPROG: zgpg30  
TD: 65536  
SOLVENT: DMSO  
DS: 4  
SWH: 6064.161 Hz  
FIDRES: 0.121012 Hz  
AQ: 0.110164 sec  
RG: 1024  
WM: 74.400 usec  
WDW: EM  
SSB: 0.000000  
LB: 200.2 Hz  
GB: 0.000000000  
PC: 0.000000000  
SFO: 500.1362600 MHz  
D1: 0.000000000  
D15: 0.000000000  
D16: 0.000000000  
D17: 0.000000000

===== CHANNEL f1 =====  
NUC1: 13C  
P1: 12.00 usec  
PL1: 0.00 dB  
SFO1: 100.6261800 MHz

===== GRABBER CHANNEL =====  
OPBAND1: 125.010000 MHz  
OPBAND2: 125.010000 MHz  
OPBAND3: 125.010000 MHz  
SFO2: 500.1362600 MHz  
SFO3: 500.1362600 MHz  
SFO4: 500.1362600 MHz  
SFO5: 500.1362600 MHz  
SFO6: 500.1362600 MHz  
SFO7: 500.1362600 MHz  
SFO8: 500.1362600 MHz  
SFO9: 500.1362600 MHz  
SFO10: 500.1362600 MHz  
SFO11: 500.1362600 MHz  
SFO12: 500.1362600 MHz  
SFO13: 500.1362600 MHz  
SFO14: 500.1362600 MHz  
SFO15: 500.1362600 MHz  
SFO16: 500.1362600 MHz  
SFO17: 500.1362600 MHz  
SFO18: 500.1362600 MHz  
SFO19: 500.1362600 MHz  
SFO20: 500.1362600 MHz  
SFO21: 500.1362600 MHz  
SFO22: 500.1362600 MHz  
SFO23: 500.1362600 MHz  
SFO24: 500.1362600 MHz  
SFO25: 500.1362600 MHz  
SFO26: 500.1362600 MHz  
SFO27: 500.1362600 MHz  
SFO28: 500.1362600 MHz  
SFO29: 500.1362600 MHz  
SFO30: 500.1362600 MHz  
SFO31: 500.1362600 MHz  
SFO32: 500.1362600 MHz  
SFO33: 500.1362600 MHz  
SFO34: 500.1362600 MHz  
SFO35: 500.1362600 MHz  
SFO36: 500.1362600 MHz  
SFO37: 500.1362600 MHz  
SFO38: 500.1362600 MHz  
SFO39: 500.1362600 MHz  
SFO40: 500.1362600 MHz  
SFO41: 500.1362600 MHz  
SFO42: 500.1362600 MHz  
SFO43: 500.1362600 MHz  
SFO44: 500.1362600 MHz  
SFO45: 500.1362600 MHz  
SFO46: 500.1362600 MHz  
SFO47: 500.1362600 MHz  
SFO48: 500.1362600 MHz  
SFO49: 500.1362600 MHz  
SFO50: 500.1362600 MHz  
SFO51: 500.1362600 MHz  
SFO52: 500.1362600 MHz  
SFO53: 500.1362600 MHz  
SFO54: 500.1362600 MHz  
SFO55: 500.1362600 MHz  
SFO56: 500.1362600 MHz  
SFO57: 500.1362600 MHz  
SFO58: 500.1362600 MHz  
SFO59: 500.1362600 MHz  
SFO60: 500.1362600 MHz  
SFO61: 500.1362600 MHz  
SFO62: 500.1362600 MHz  
SFO63: 500.1362600 MHz  
SFO64: 500.1362600 MHz  
SFO65: 500.1362600 MHz  
SFO66: 500.1362600 MHz  
SFO67: 500.1362600 MHz  
SFO68: 500.1362600 MHz  
SFO69: 500.1362600 MHz  
SFO70: 500.1362600 MHz  
SFO71: 500.1362600 MHz  
SFO72: 500.1362600 MHz  
SFO73: 500.1362600 MHz  
SFO74: 500.1362600 MHz  
SFO75: 500.1362600 MHz  
SFO76: 500.1362600 MHz  
SFO77: 500.1362600 MHz  
SFO78: 500.1362600 MHz  
SFO79: 500.1362600 MHz  
SFO80: 500.1362600 MHz  
SFO81: 500.1362600 MHz  
SFO82: 500.1362600 MHz  
SFO83: 500.1362600 MHz  
SFO84: 500.1362600 MHz  
SFO85: 500.1362600 MHz  
SFO86: 500.1362600 MHz  
SFO87: 500.1362600 MHz  
SFO88: 500.1362600 MHz  
SFO89: 500.1362600 MHz  
SFO90: 500.1362600 MHz  
SFO91: 500.1362600 MHz  
SFO92: 500.1362600 MHz  
SFO93: 500.1362600 MHz  
SFO94: 500.1362600 MHz  
SFO95: 500.1362600 MHz  
SFO96: 500.1362600 MHz  
SFO97: 500.1362600 MHz  
SFO98: 500.1362600 MHz  
SFO99: 500.1362600 MHz  
SFO100: 500.1362600 MHz

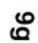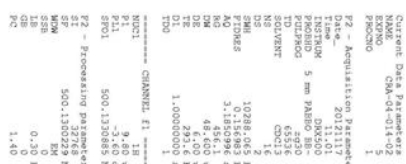

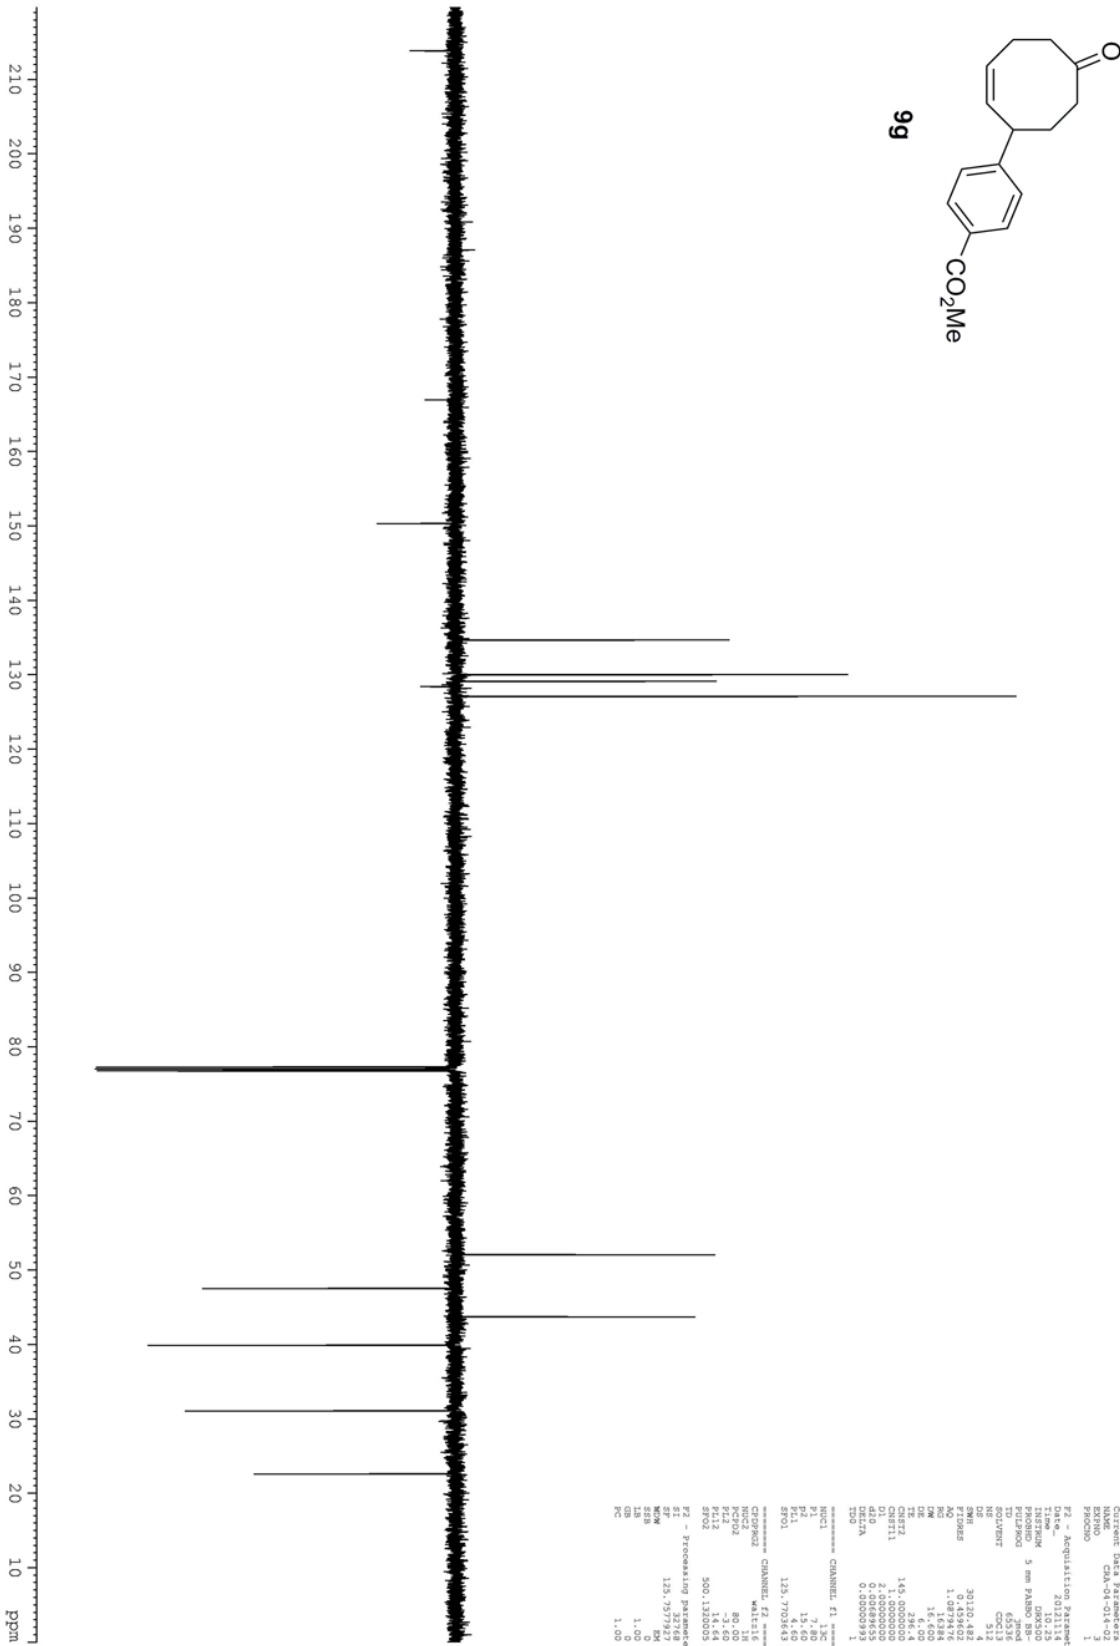

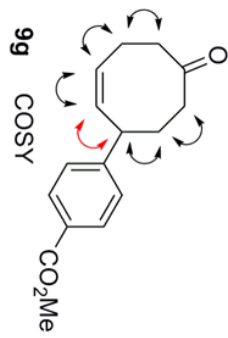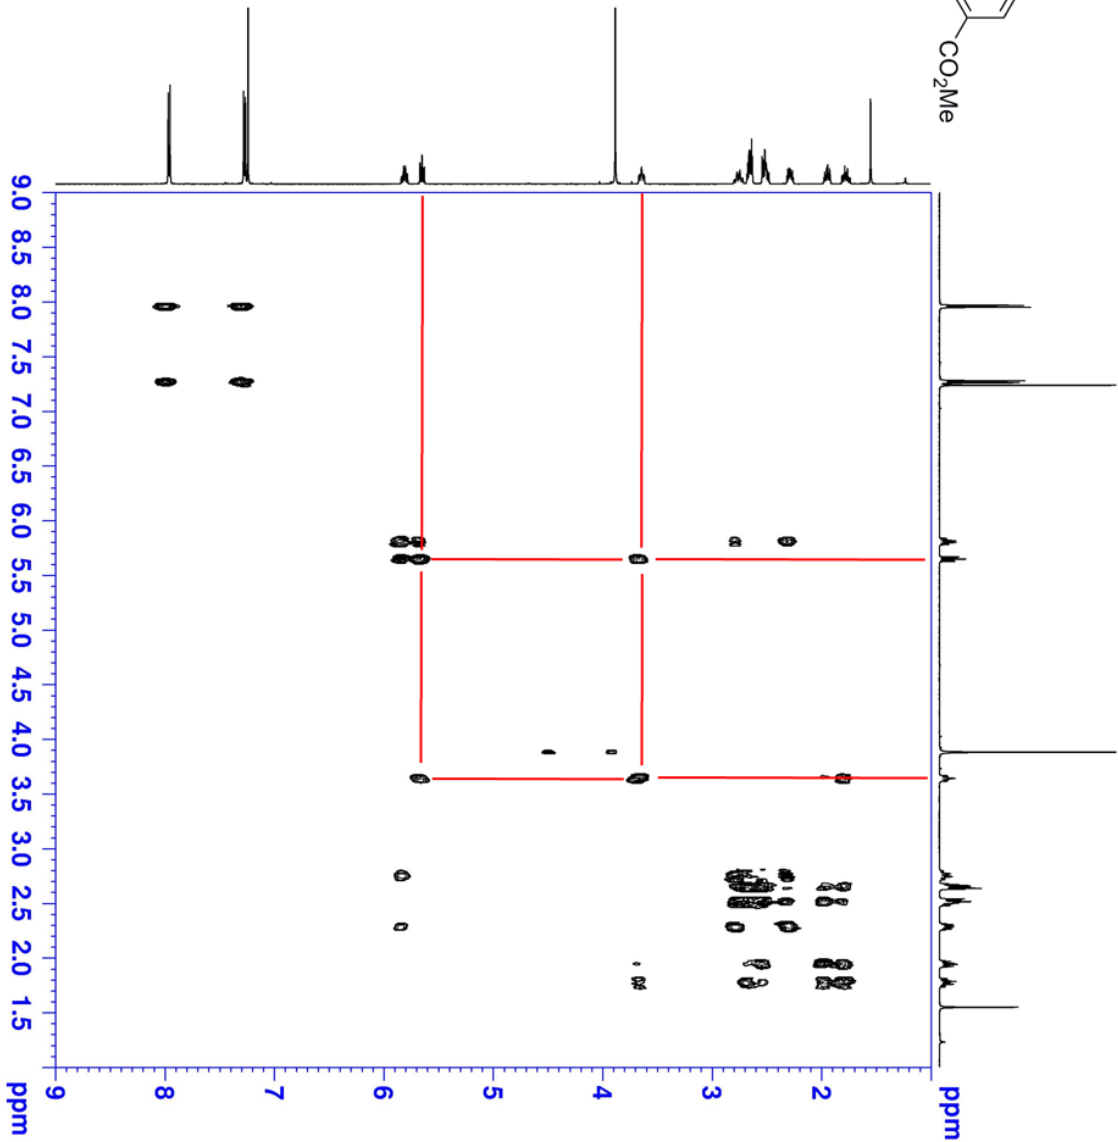

Current Data Parameters  
NAME: CSA-04-014-02  
EXPNO: 6  
PROCNO: 1  
F2 - Acquisition Parameters  
Date\_: 20121117  
Time: 13:02  
INSTRUM: spect  
PROBHD: 5 mm PABBO BB-  
PULPROG: cosygmrgf  
TD: 268  
SOLVENT: DMSO  
NS: 8  
DS: 8  
SWH: 6684.492 Hz  
FIDRES: 0.153204 Hz  
AQ: 0.153204 sec  
RG: 16384  
DE: 74.800 usec  
DI: 6.00 usec  
DO: 2.00 usec  
D1: 0.0000000 sec  
d12: 0.0000000 sec  
d13: 0.0000000 sec  
IN0: 0.0001496 sec  
NUC1: 13C  
P1: 9.40 usec  
PL1: -3.60 dB  
SFO1: 500.1322506 MHz  
GRNAM1: GRN100  
SINE: 100  
GRNAM2: GRN100  
SINE: 100  
GRNAM3: GRN100  
SINE: 100  
GR21: 12.00 %  
GR22: 12.00 %  
GR23: 40.00 %  
P16: 1000.00 usec  
F1 - Acquisition Parameters  
NDO: 1  
TD: 128  
SFO1: 500.1322 MHz  
PC: 1.00  
SFO2: 500.130225 MHz  
PC: 1.00  
F2 - Processing parameters  
SI: 1024  
SF: 500.1300654 MHz  
WDW: SINE  
SSB: 0  
GB: 0  
PC: 1.00  
F1 - Processing parameters  
SI: 1024  
SF: 500.1300654 MHz  
WDW: SINE  
SSB: 0  
GB: 0  
LB: 0.00 Hz  
GB: 0



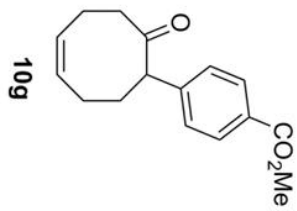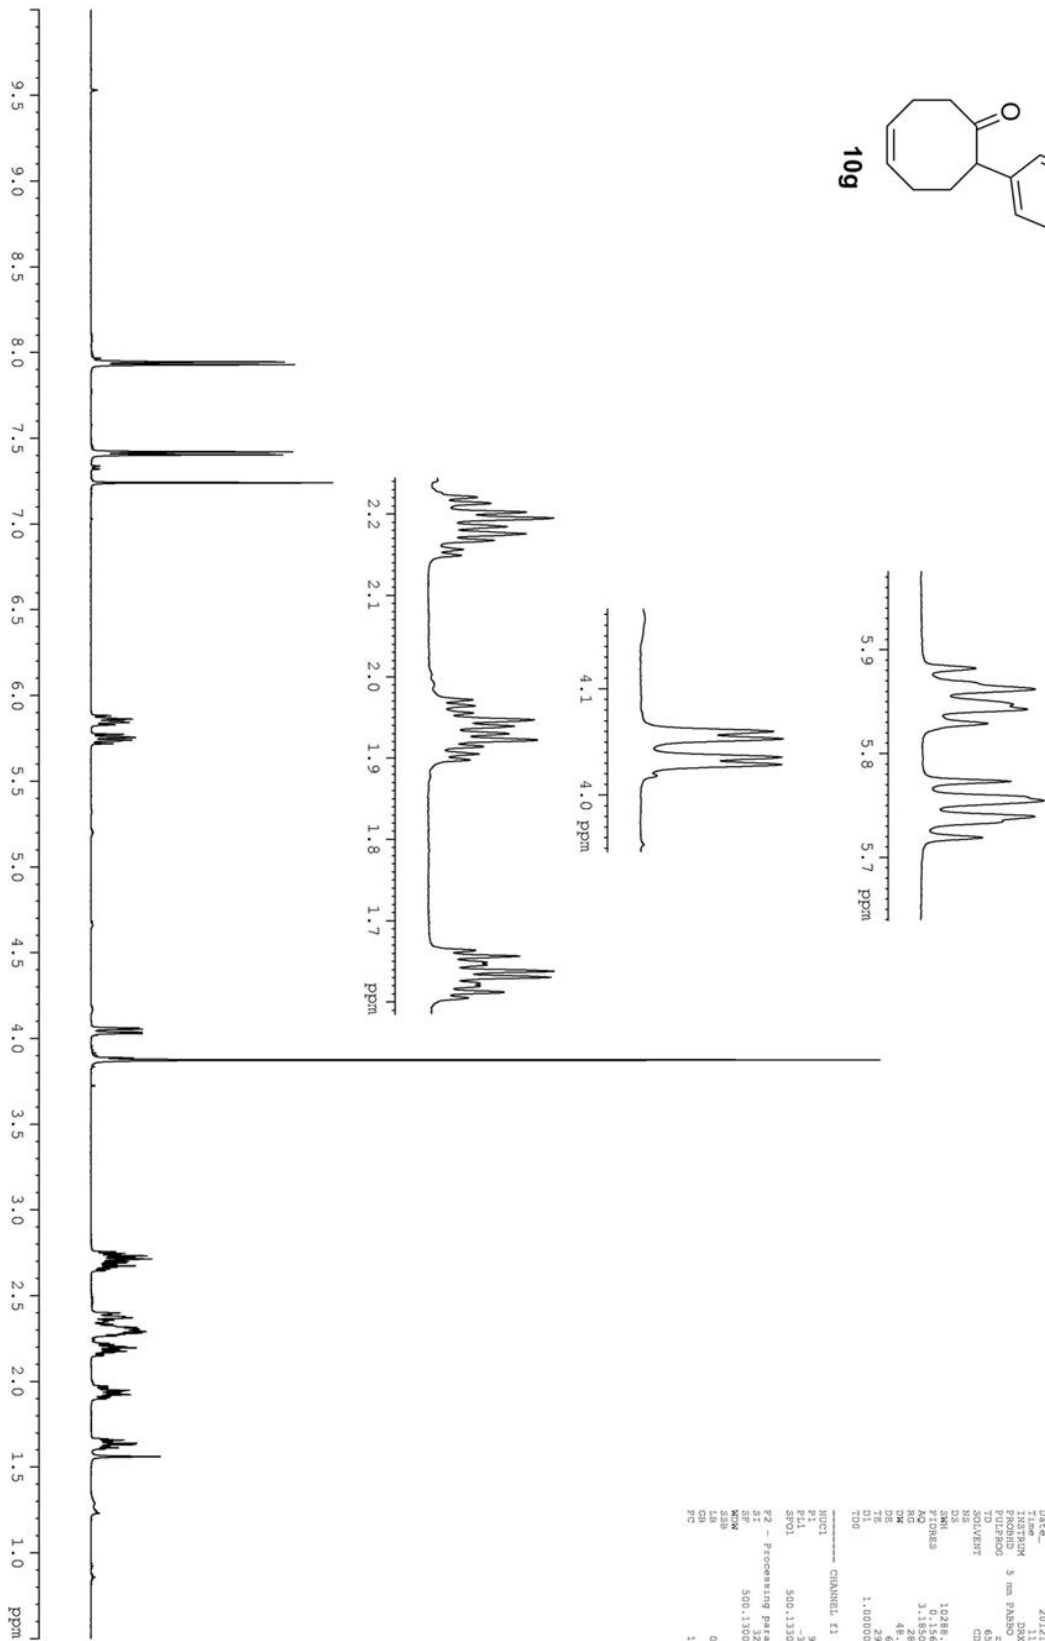

Current Data Parameters  
NAME: CBA-02-014-0  
EXPNO: 1  
PROCNO: 1  
F2 - Acquisition Parameters  
Date\_ : 20121111  
Time : 11:15:11  
INSTRUM : spect  
PROBHD : 5 mm PABBO BH  
PULPROG : zgpg30  
TD : 65536  
SOLVENT : CDCl<sub>3</sub>  
DS : 1  
SS : 1  
SFO1 : 1028.436  
AQ : 3.185099  
RG : 287.2  
DM : 48.60  
TE : 293.2  
D1 : 1.0000000  
100  
----- CHANNEL f1 -----  
NUC1 : 13C  
P1 : 9.81  
PL1 : -3.61  
SFO1 : 500.13088  
F2 - Processing parameters  
SI : 32768  
SF : 500.13088  
WDW : EM  
SSB : 0.3  
GB : 1  
PC : 1.01

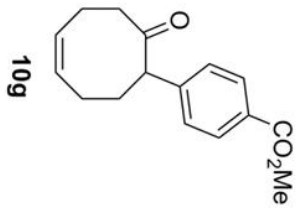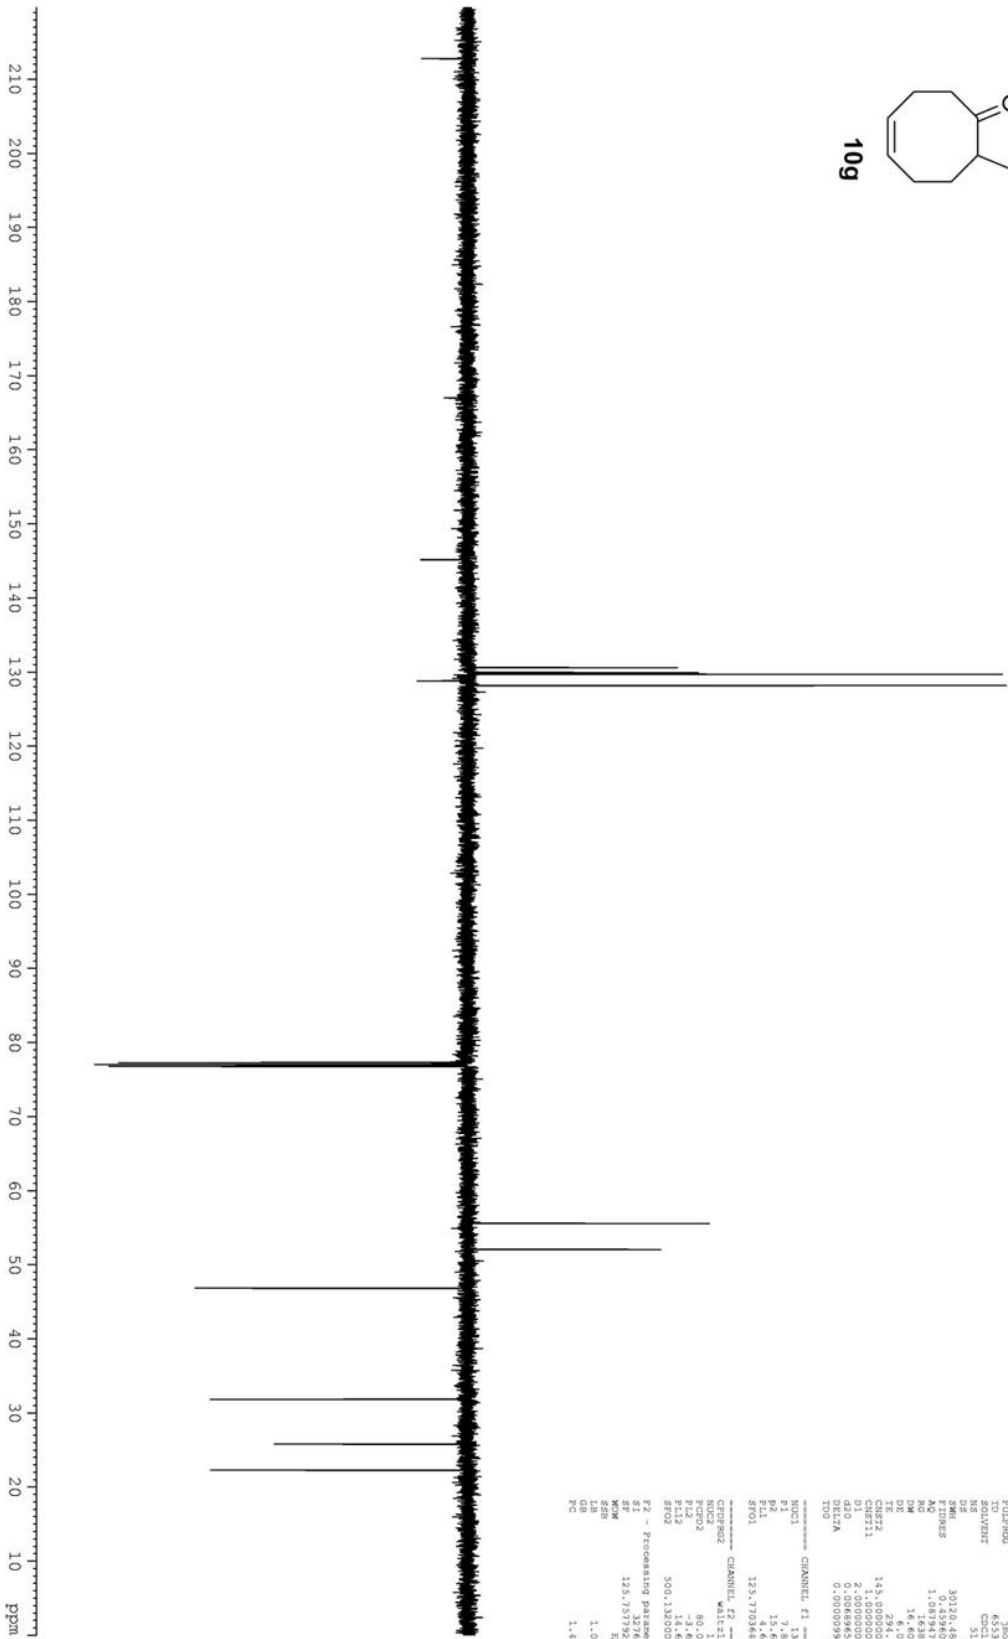

Current Data Parameters  
NAME: C9A-04-014-01  
INSTR: spect  
PROCNO: 1  
F2 - Acquisition Parameters  
Date\_: 2011117  
Time: 12.26  
INSTRUM: spect  
PROBHD: 5 mm BBO-BB-  
PULPROG: zgpg30  
TD: 65536  
SOLVENT: CDCl3  
NS: 512  
DS: 4  
SWH: 30120.492 Hz  
FIDRES: 0.459402 Hz  
AQ: 11.01295000 s  
RG: 16384  
OW: 16.600 s  
TE: 294.1 K  
C13F2: 145.000000  
C13F1: 125.000000  
D1F2F1: 2.0000000 Hz  
D1F1: 0.06656455 Hz  
D1F0: 0.00000000 Hz  
TDO: 0.00000000 s  
===== CHANNEL f1 =====  
NUC1: 13C  
P1: 7.00 s  
PL1: 0.00 dB  
PL2: 12.00 dB  
PL: 4.00 dB  
SFO1: 125.7703613 MHz  
===== CHANNEL f2 =====  
CPDPRG2: waltz16  
NUC2: 1H  
P2: 12.00 s  
PL2: -3.00 dB  
PL: 0.00 dB  
SFO2: 500.1360005 MHz  
F2 - Processing parameters  
SI: 32768  
SF: 125.7577929 MHz  
WDW: EM  
SSB: 0  
GB: 0  
LB: 1.00 Hz  
GB1: 0  
PC: 1.40



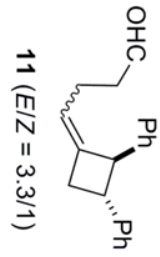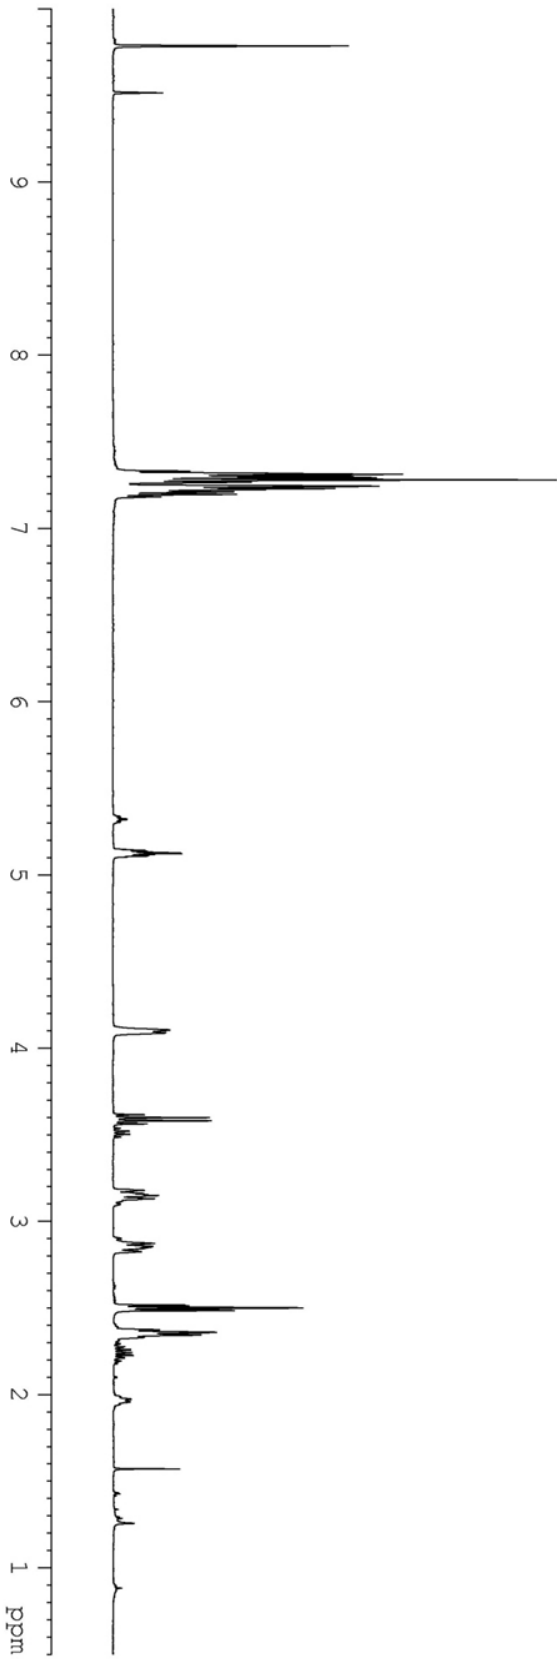

Current Data Parameters  
NAME: 11-13-18-01  
EXPNO: 1  
PROCNO: 1  
F2 - Acquisition Parameters  
Date\_ Time: 20180313 13:32  
INSTRUM: spect  
PROBHD: 5 mm PABBO 1H-  
PULPROG: zgpg30  
TD: 65536  
SOLVENT: CDCl3  
NS: 16  
DS: 4  
SWH: 10280.65 Hz  
FIDRES: 0.22 Hz  
AQ: 3.180096 sec  
RG: 48.000  
DE: 48.000 umsec  
TE: 300.2 K  
D1: 1.0000000 sec  
D10: 1  
===== CHANNEL f1 =====  
NUC1: 13C  
P1: 9.00 umsec  
PL1: -1.00 dB  
SFO1: 500.1300000 MHz  
F2 - Processing parameters  
SI: 32768  
SF: 500.1300000 MHz  
WDW: EM  
SSB: 0  
LB: 0.30 Hz  
GB: 0  
PC: 1.00

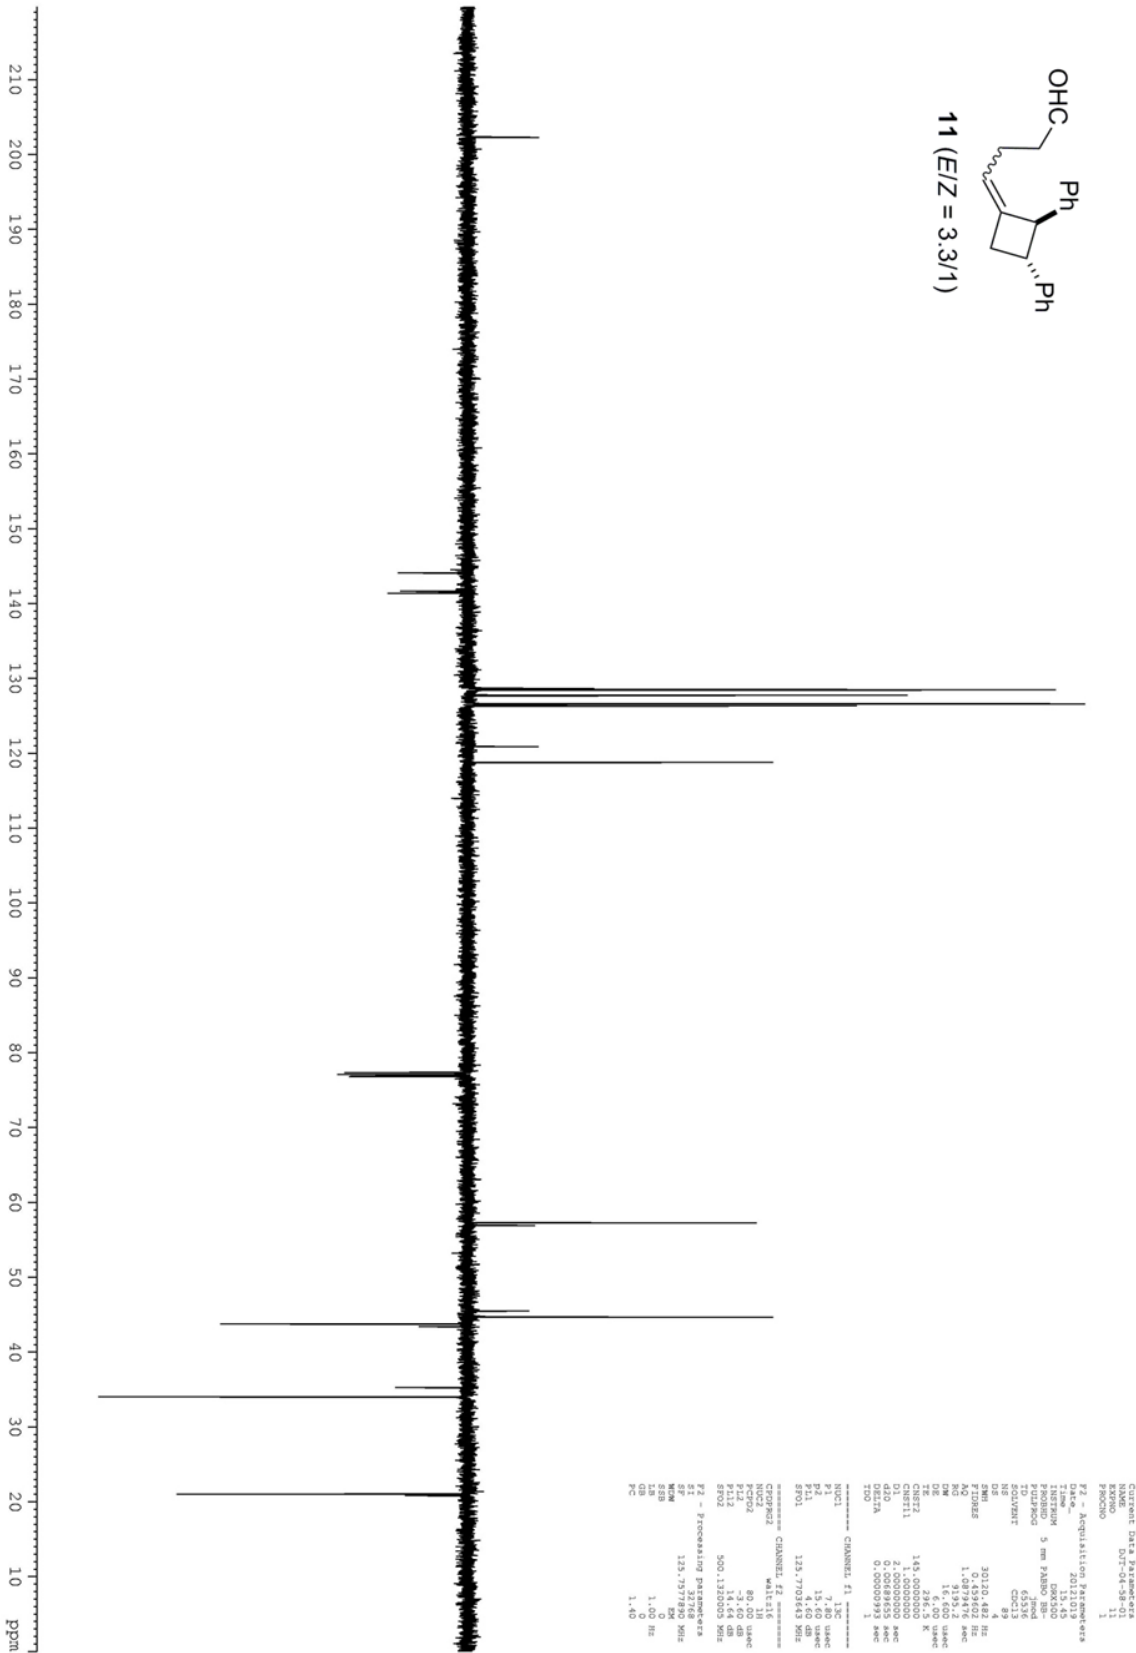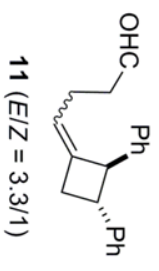

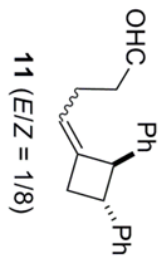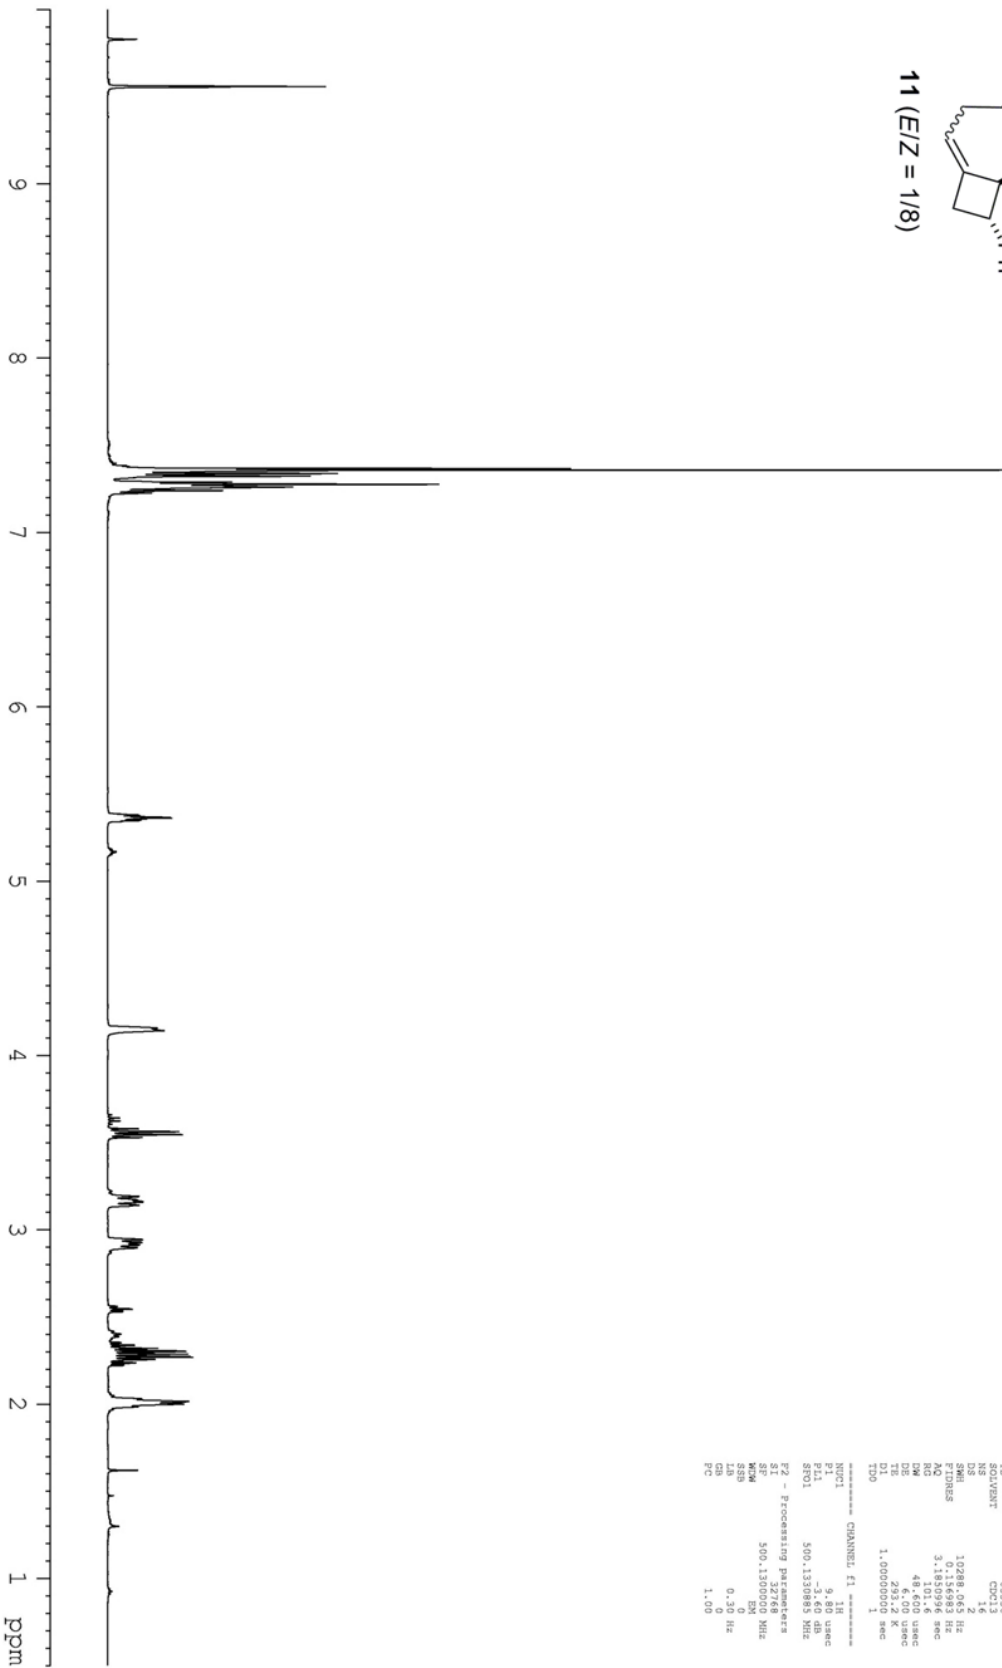

Current Data Parameters  
NAME 11  
EXPNO 1  
PROCNO 1  
F2 - Acquisition Parameters  
Date\_ 20121015  
Time 12.45  
INSTRUM spect  
PROBHD 5 mm PABBO BB-  
PULPROG zgpg30  
TD 65536  
FIDRES 0.15982 Hz  
SOLVENT CDCl3  
NS 16  
DS 4  
SWH 10288.065 Hz  
FIDRES 0.15982 Hz  
AQ 4.433992 sec  
RG 3.1014 sec  
DW 48.400 usec  
TE 293.2 K  
D1 1.0000000 sec  
D1 1  
===== CHANNEL f1 =====  
NUC1 13C  
P1 10.00 usec  
PL1 0.00 dB  
SFO1 500.130885 MHz  
F2 - Processing parameters  
SI 32768  
SF 500.130885 MHz  
WDW EM  
SSB 0 Hz  
GB 0  
PC 1.00

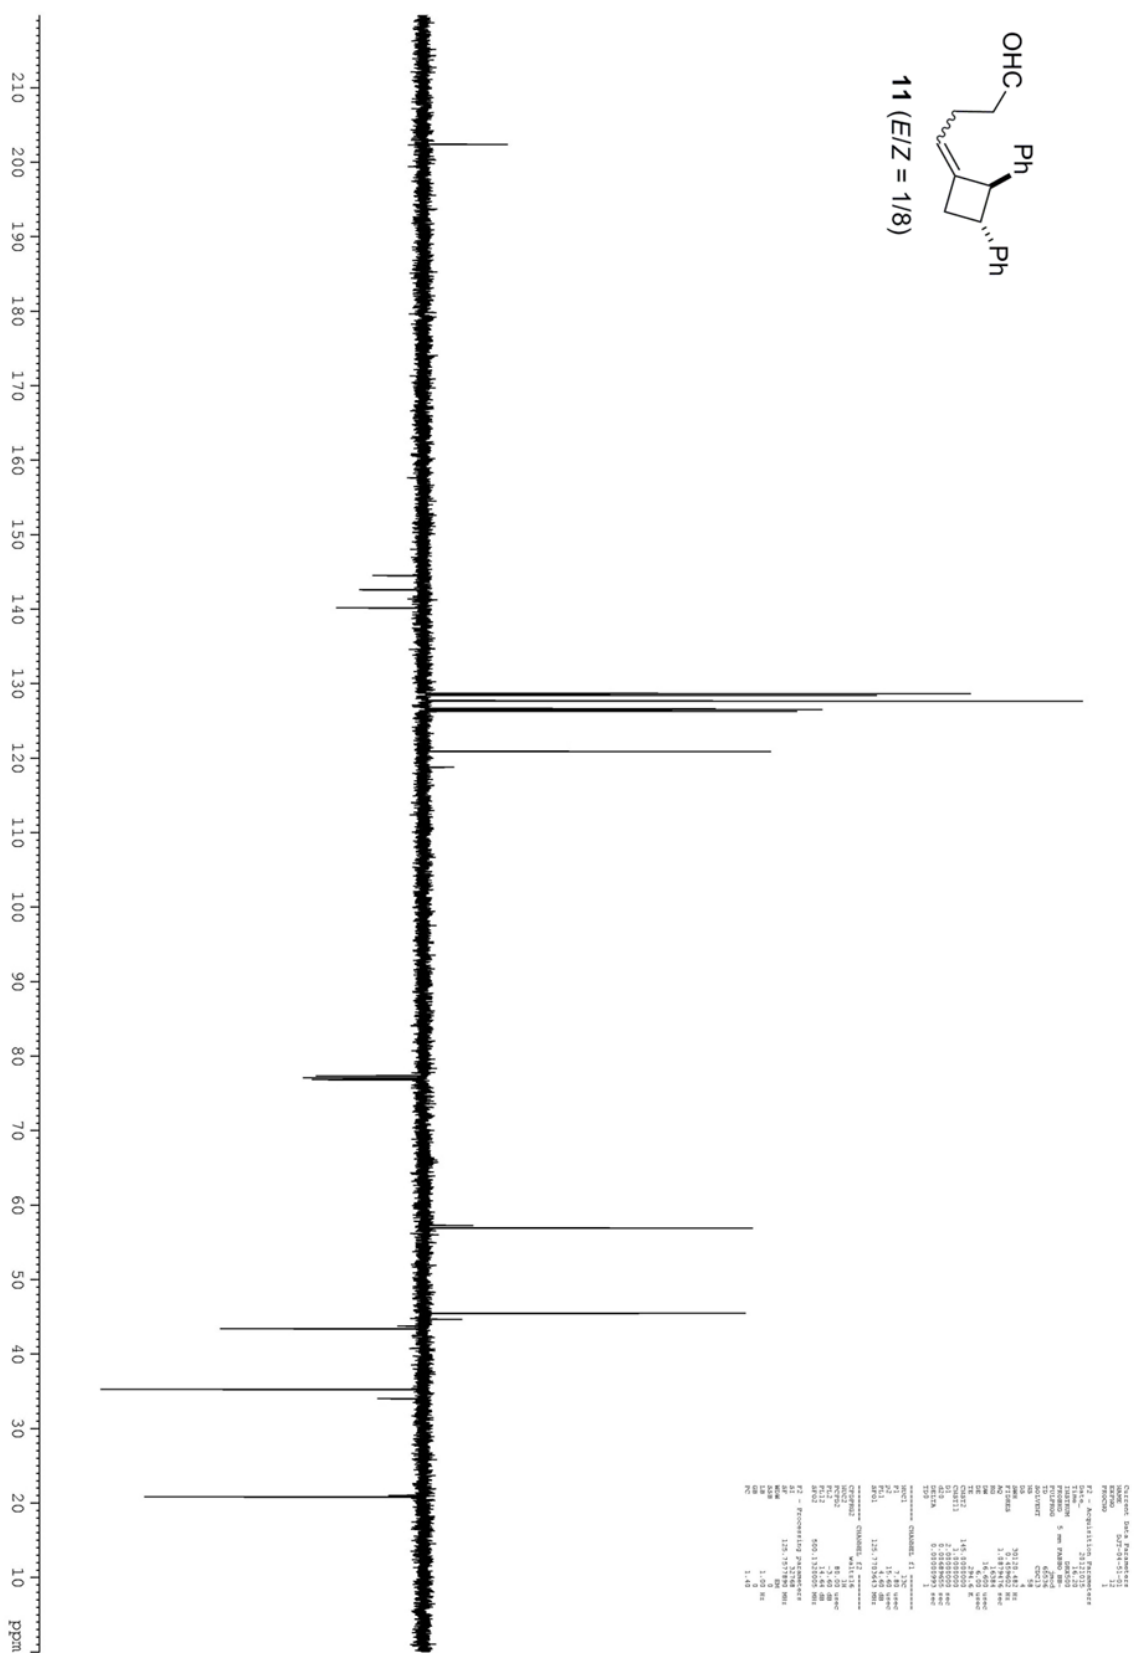

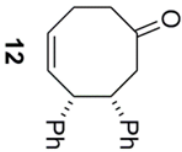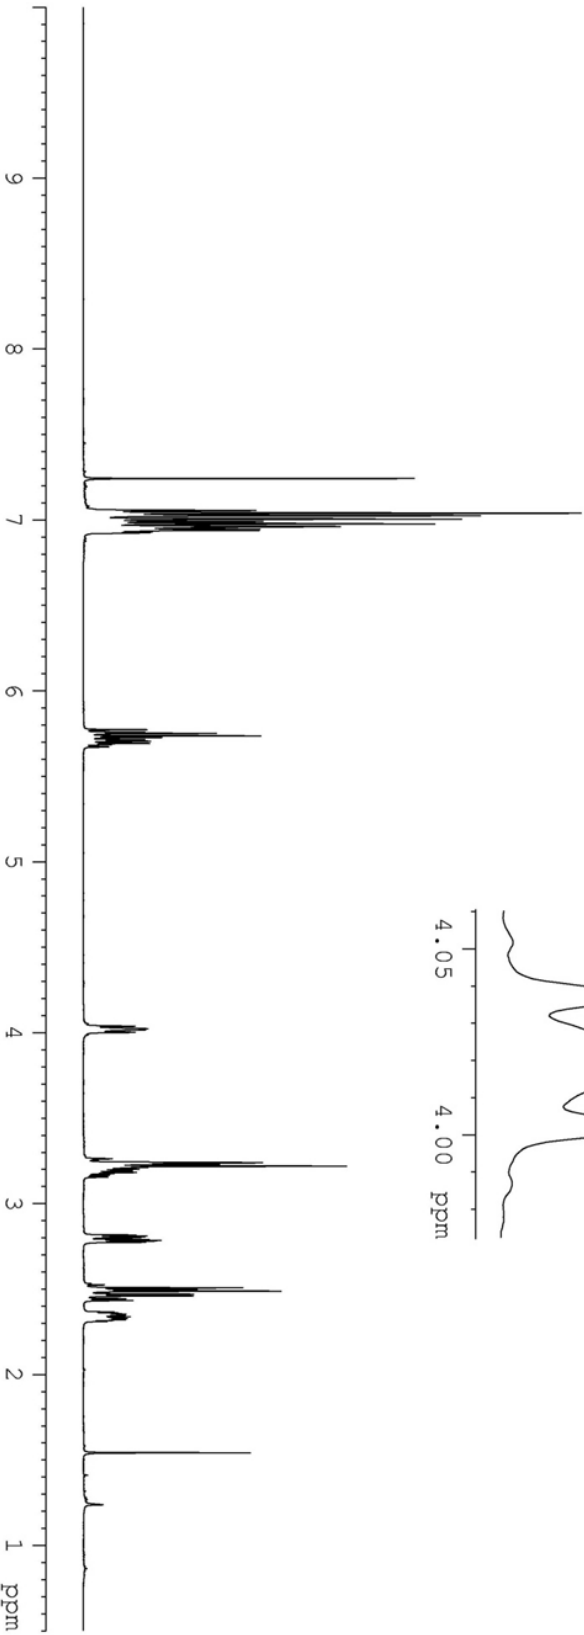

Current Data Parameters  
NAME CDA-04-013-02  
EXPNO 2  
PROCNO 1  
F2 - Acquisition Parameters  
Date\_ 20121024  
Time 11:54:24  
INSTRUM spect  
PROBHD 5 mm PABBO BH-  
PULPROG zgpg30  
TD 65536  
SOLVENT CDCl3  
NS 18  
DS 2  
SWH 10288.065 Hz  
FIDRES 0.185653 Hz  
AQ 3.1850996 sec  
RG 4096  
WDW 4.000000 sec  
DE 5.00 dB  
TE 300.2 K  
D1 1.0000000 sec  
TDO 1

===== CHANNEL f1 =====  
NUC1 13C  
P1 12.00  
PL1 0.00 dB  
PC1 -3.60 dB  
SFO1 500.135085 MHz  
F2 - Processing parameters  
SI 32768  
SF 500.135085 MHz  
WDW EM  
SSB 0.30 Hz  
GB 1.00  
PC



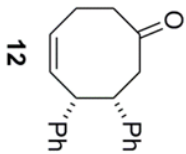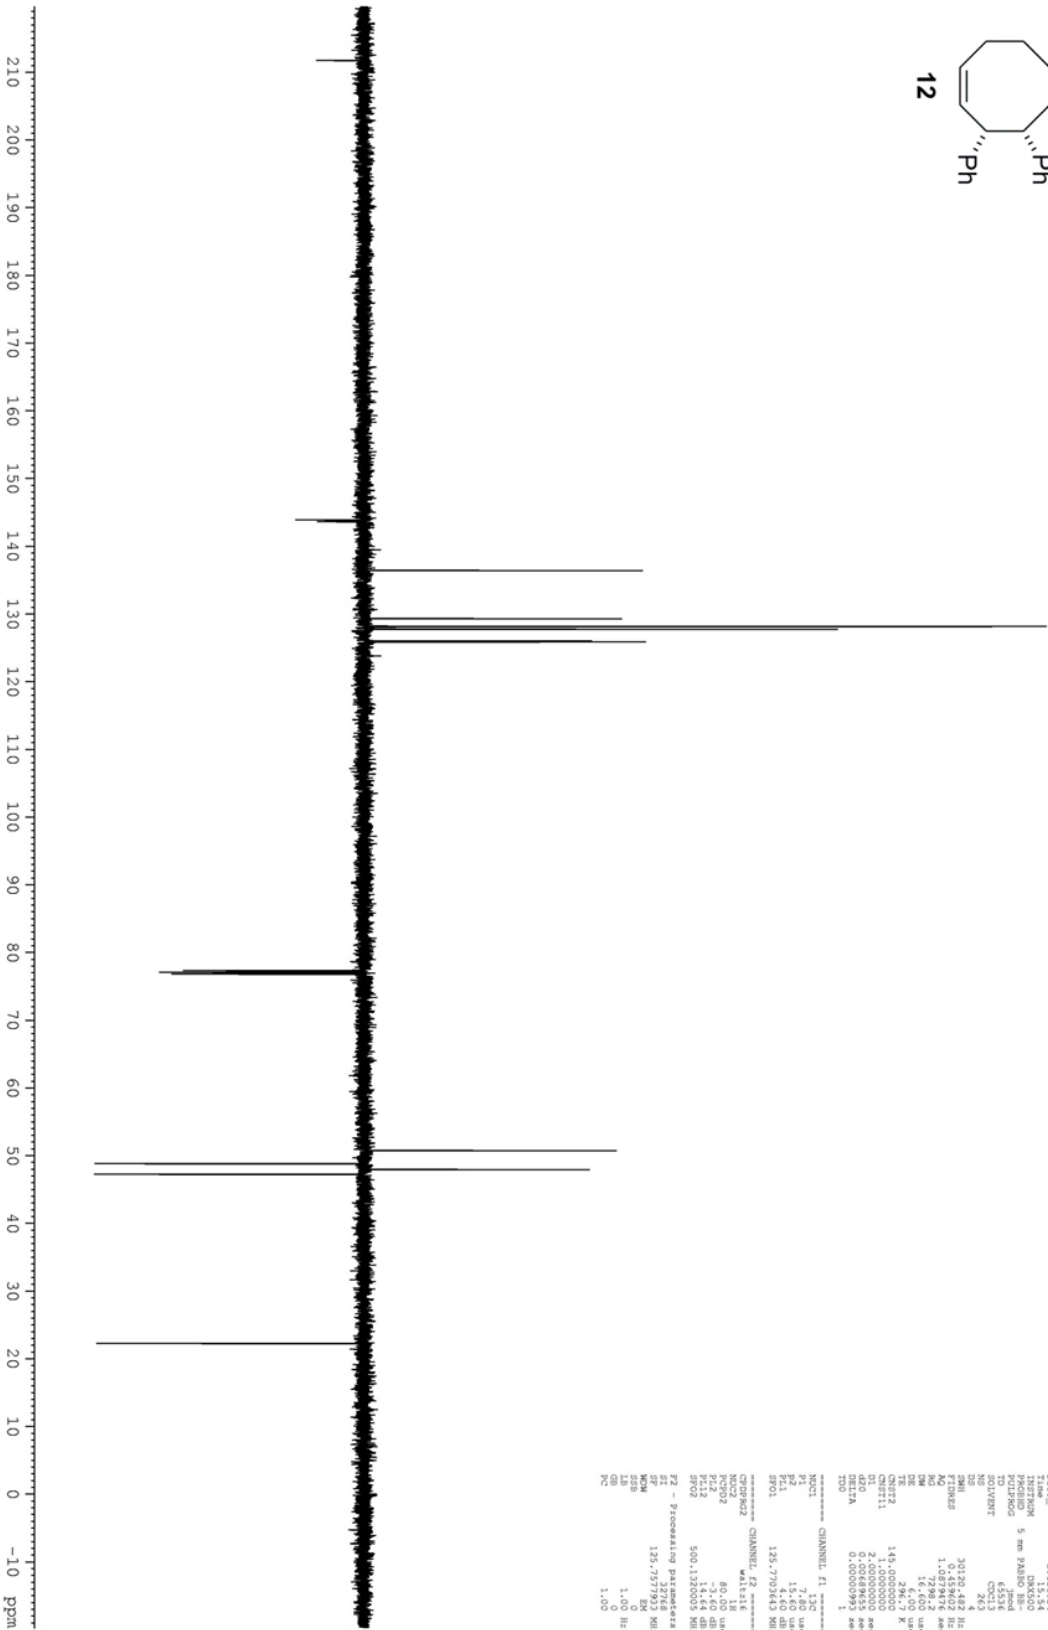

Current Data Parameters  
NAME CMA-04-012-02  
EXPNO 1  
PROCNO 1  
F2 - Acquisition Parameters  
Date\_ 20121024  
Time 14:00:00  
PROBHD 5 mm PABBO BB-  
PULPROG zgpg30  
TD 65536  
SOLVENT CDCl3  
NS 4  
DS 4  
SWH 30136.444 Hz  
AQ 1.0879876 sec  
RG 327.273 Hz  
FM 16.400 usec  
SFO 500.136099 MHz  
TE 300.2 K  
FIDRES 0.145000000  
AQRES 0.0000000  
D1 2.00000000 sec  
DELTA 0.00000000 sec  
T1 0.00000000 sec  
T2 0.00000000 sec  
T2RHO 1  
T3 0.00000000 sec  
T3RHO 1  
T4 0.00000000 sec  
T4RHO 1  
===== CHANNEL f1 =====  
NUC1 13C  
P1 15.40 usec  
PL1 0.00 dB  
SFO1 125.770449 MHz  
===== CHANNEL f2 =====  
NUC2 1H  
P2 15.40 usec  
PL2 0.00 dB  
SFO2 500.136099 MHz  
===== CHANNEL f3 =====  
NUC3 1H  
P3 15.40 usec  
PL3 0.00 dB  
SFO3 500.136099 MHz  
F2 - Processing parameters  
SI 32768  
SF 500.136099 MHz  
WDW EM  
SSB 0  
GB 0  
PC 1.00

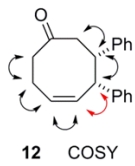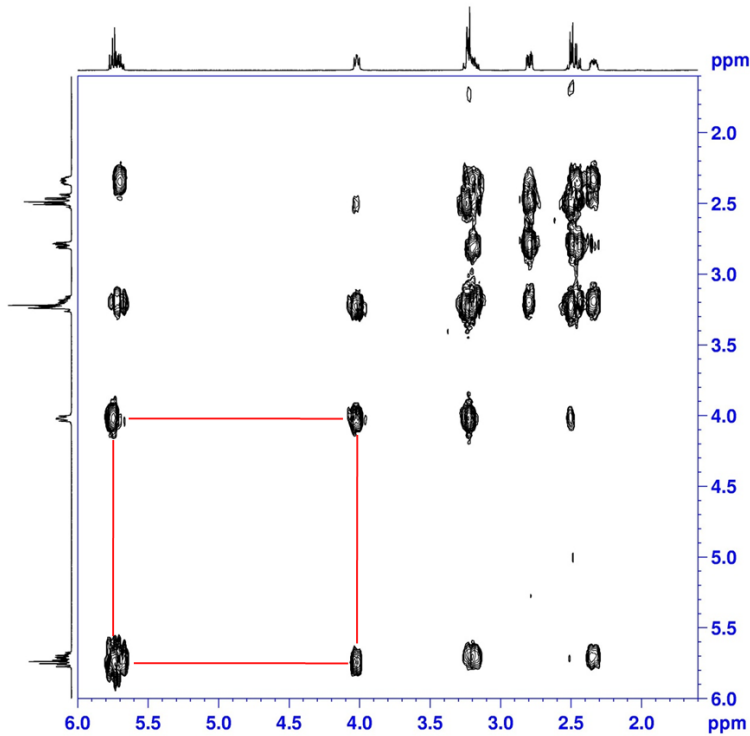

Current Data Parameters  
NAME CHA-04-012-02  
EXPNO 2  
PROCNO 1

F2 - Acquisition Parameters  
Date\_ 20121024  
Time 15.25  
INSTRUM spect  
PROBHD 5 mm PABBO 80-  
PULPROG zgpg30  
TD 65536  
SOLVENT DMSO  
DS 3  
SWH 6684.492 Hz  
FIDRES 0.1532404 Hz  
AQ 0.13004  
RG 74.800 usec  
DE 1.000  
TE 296.2 K  
D0 0.0000000 sec  
D1 2.0000000 sec  
d11 0.0000000 sec  
D16 0.0002000 sec  
D10 0.0004960 sec

===== CHANNEL F1 =====  
NUC1 1H  
P1 18 usec  
PL1 -1.50 dB  
SFO1 500.132504 MHz  
===== GRADIENT CHANNEL =====  
GPM1 SINE-100  
GPM2 SINE-100  
GPM3 SINE-100  
GP1 14.00 usec  
GP2 12.00 usec  
GP3 40.00 usec  
P16 1000.00 usec

F1 - Acquisition Parameters  
NO 1  
TD 128  
SFO1 500.1323 MHz  
FIDRES 52.222595 Hz  
SW 13.565 ppm  
FMODE QF

F2 - Processing parameters  
SI 32768  
SF 500.1300214 MHz  
WDW EM  
SSB 0.00 Hz  
LB 0.00 Hz  
GB 1.00  
PC 1.00

F1 - Processing parameters  
SI 1024  
SF 500.1300194 MHz  
WDW EM  
SSB 0.00 Hz  
LB 0.00 Hz  
GB 0.00

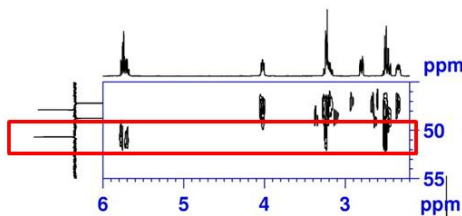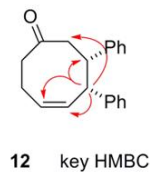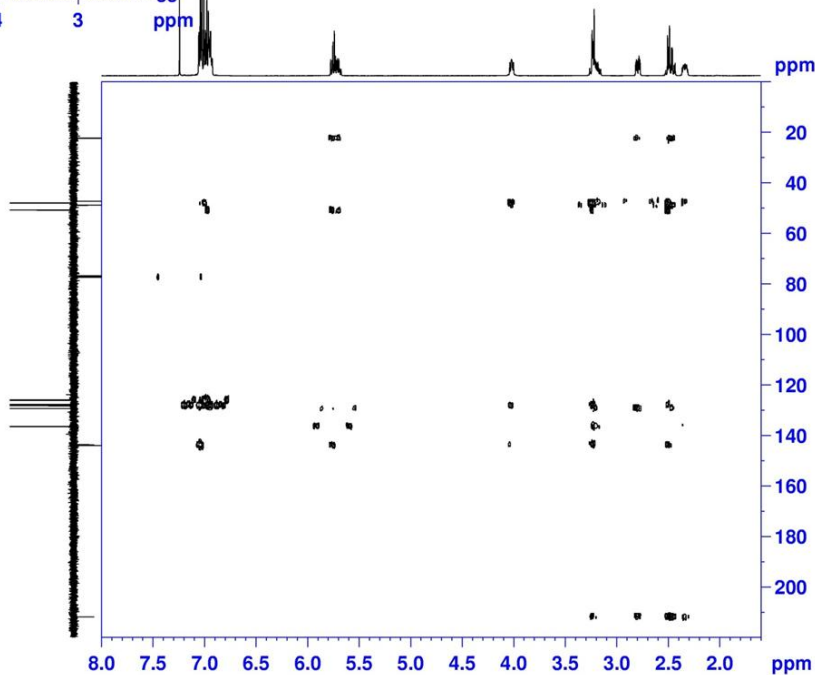

Current Data Parameters  
NAME CHA-04-012-02  
EXPNO 6  
PROCNO 1

F2 - Acquisition Parameters  
Date\_ 20121024  
Time 16.34  
INSTRUM spect  
PROBHD 5 mm PABBO 80-  
PULPROG zgpg30  
TD 65536  
SOLVENT DMSO  
DS 3  
SWH 5518.164 Hz  
FIDRES 1.347354 Hz  
AQ 0.171116 sec  
RG 18396.4  
DE 1.000  
TE 296.2 K  
D0 0.0000000 sec  
D1 1.5000000 sec  
d1 0.0000000 sec  
d2 0.0000000 sec  
d3 0.0000000 sec  
d4 0.0000000 sec  
d16 0.0000000 sec  
D10 0.0001635 sec

===== CHANNEL F1 =====  
NUC1 1H  
P1 9.80 usec  
PL1 -1.50 dB  
SFO1 500.132504 MHz  
===== CHANNEL F2 =====  
NUC2 13C  
P2 7.80 usec  
PL2 1.50 dB  
SFO2 125.7703443 MHz  
===== GRADIENT CHANNEL =====  
GPM1 SINE-100  
GPM2 SINE-100  
GPM3 SINE-100  
GP1 30.00 usec  
GP2 30.00 usec  
GP3 40.00 usec  
P16 1000.00 usec

F1 - Acquisition parameters  
NO 2  
TD 128  
SFO1 125.7703 MHz  
FIDRES 216.07191 Hz  
SW 240.211 ppm  
FMODE QF

F2 - Processing parameters  
SI 2048  
SF 500.1300214 MHz  
WDW EM  
SSB 0.00 Hz  
LB 0.00 Hz  
GB 1.00

F1 - Processing parameters  
SI 1024  
SF 125.757595 MHz  
WDW EM  
SSB 0.00 Hz  
LB 0.00 Hz  
GB 0.00

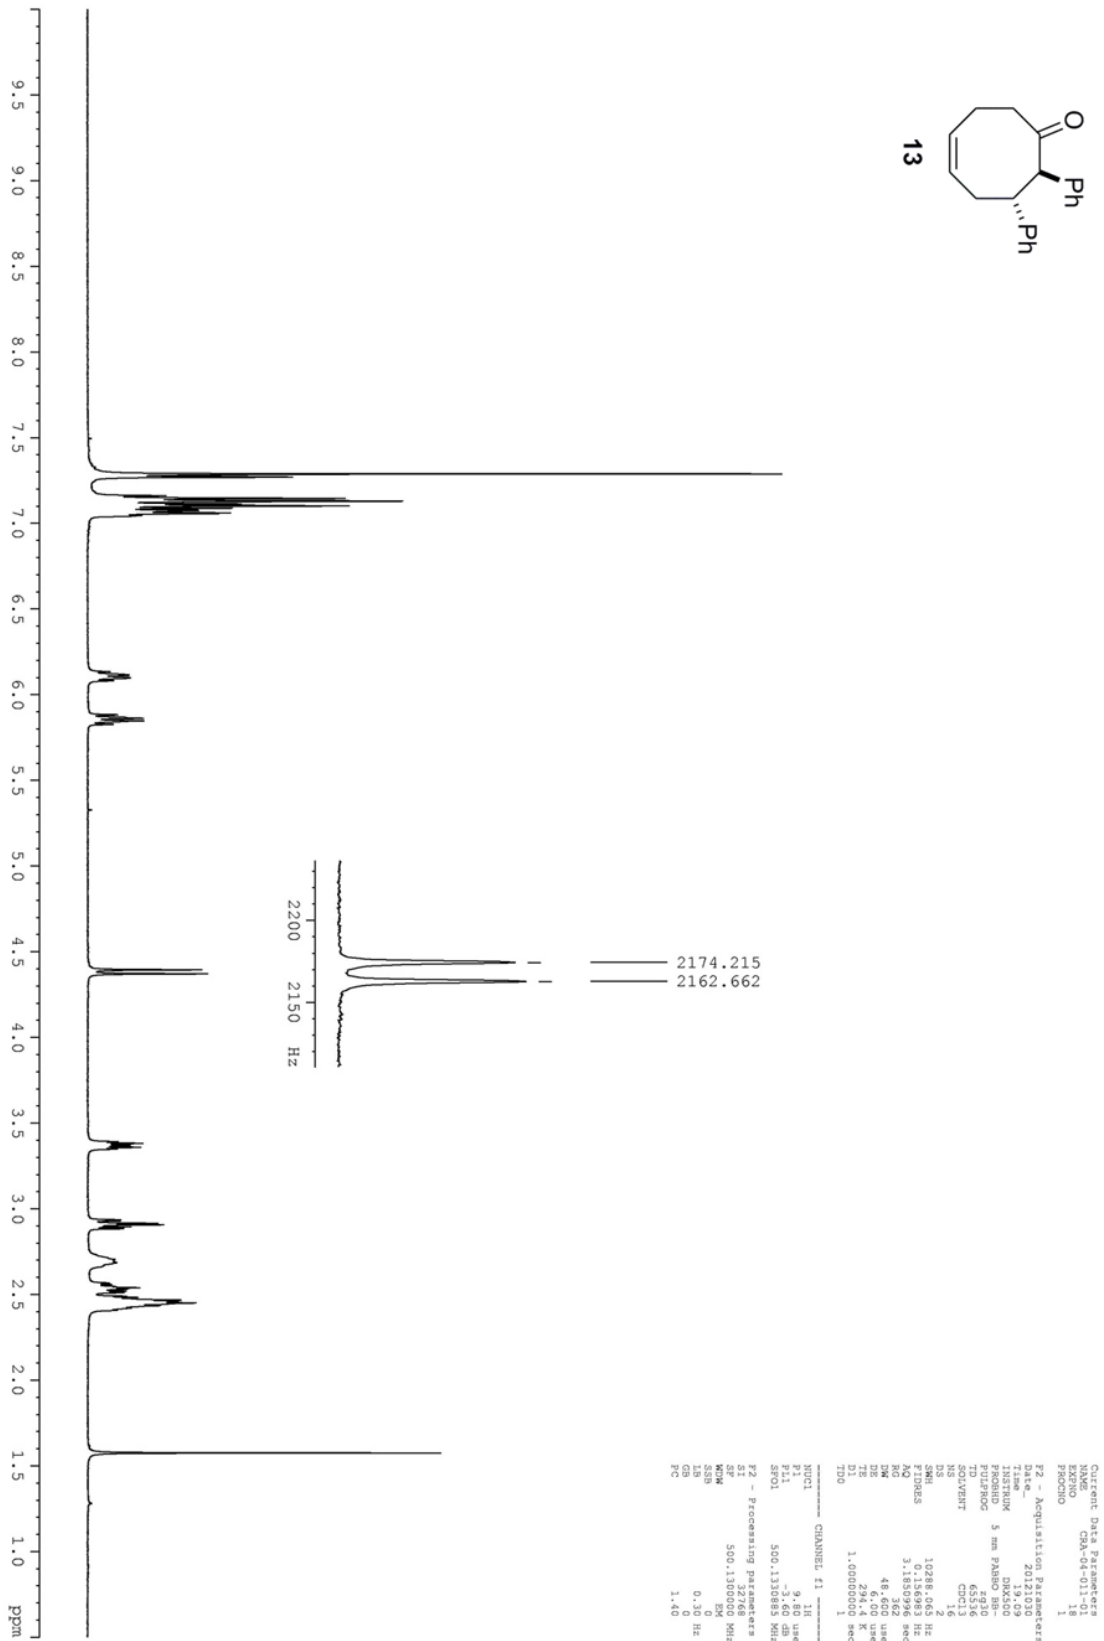

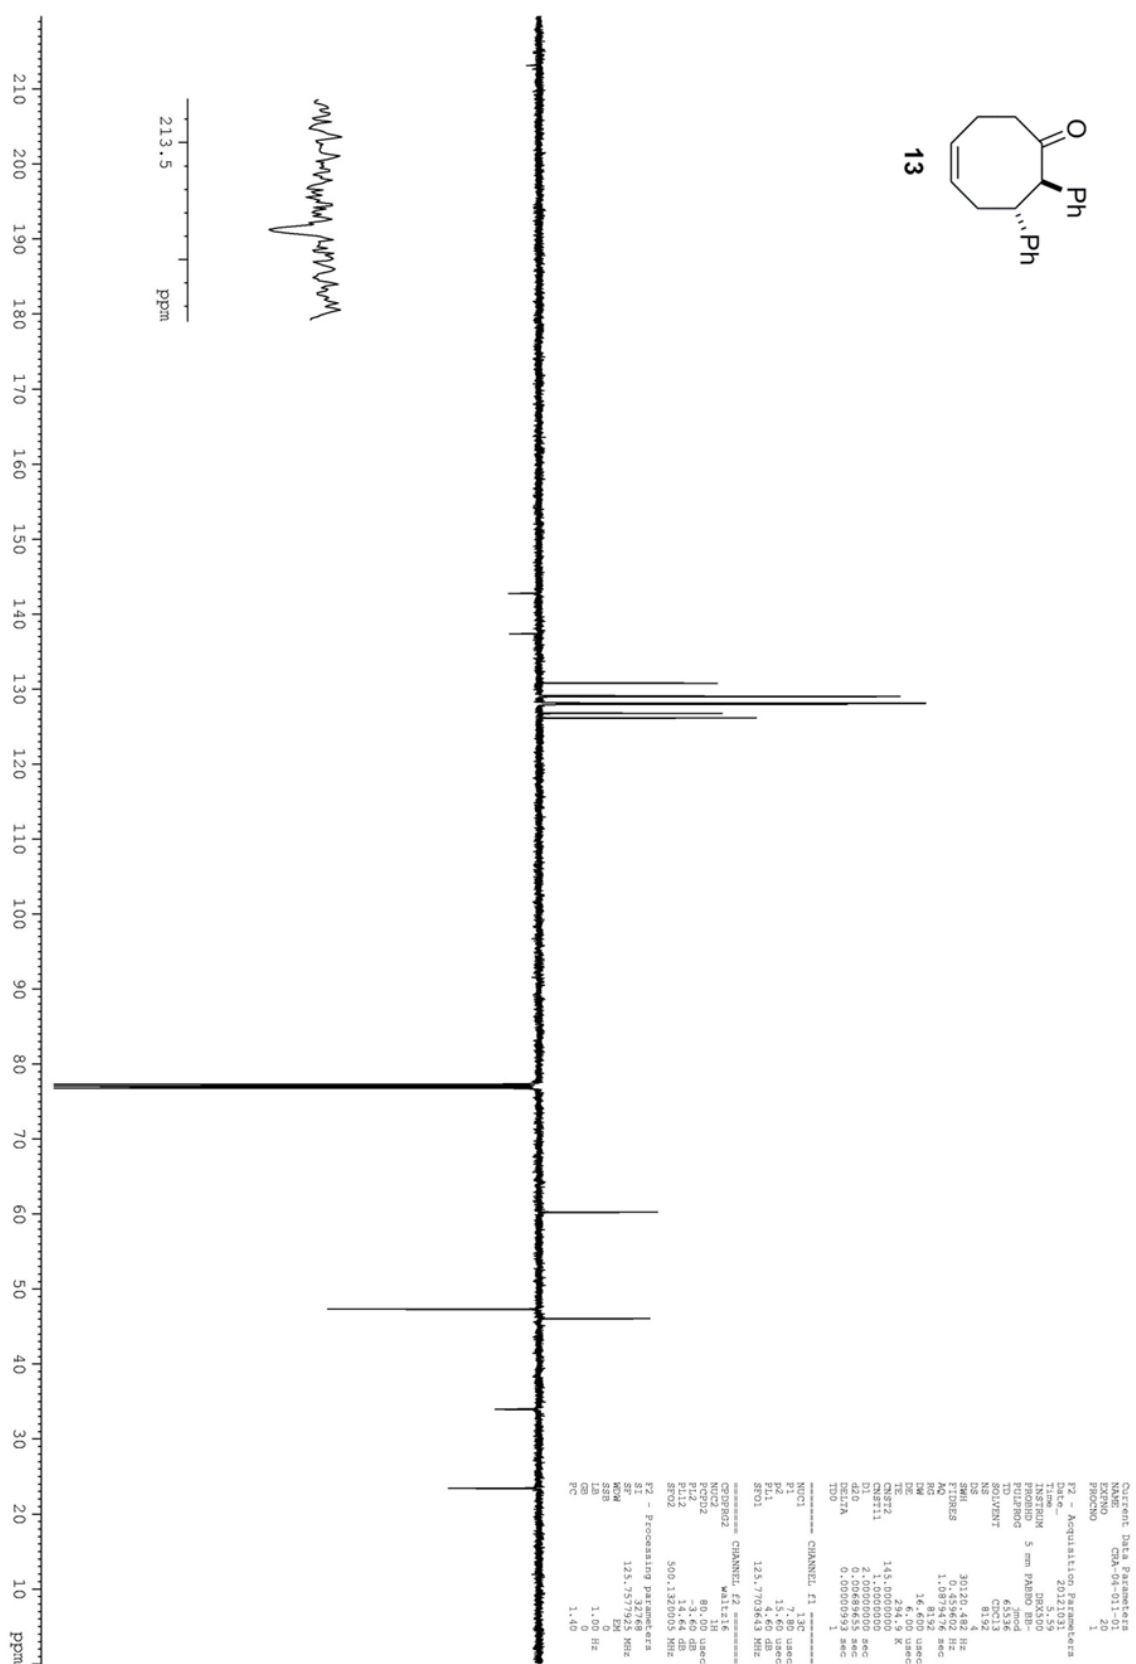

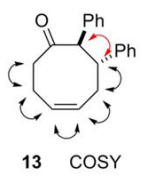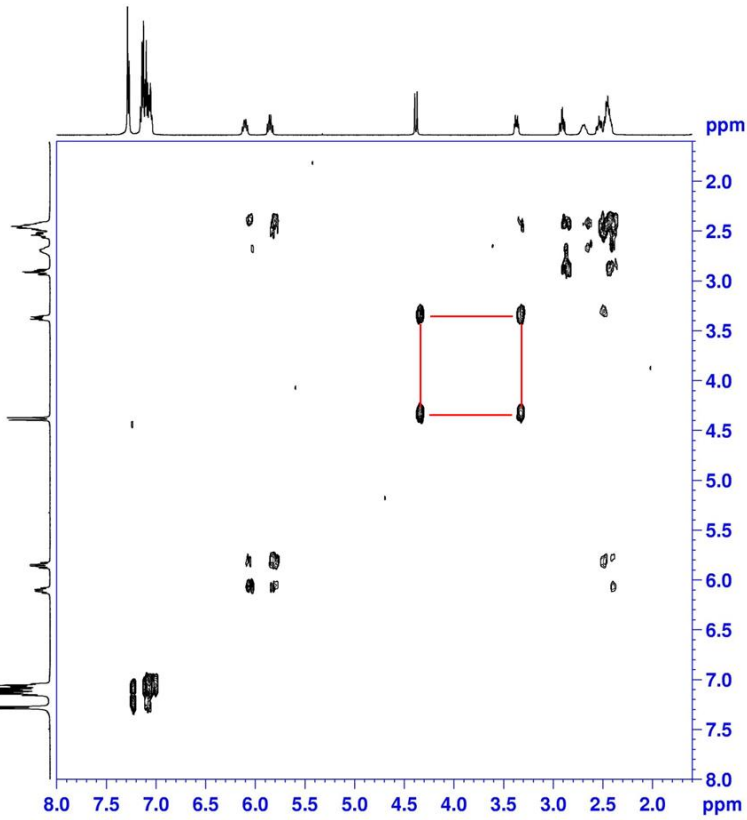

Current Data Parameters  
NAME CRA-04-012-01  
EXPNO 4  
PROCNO 1

F2 - Acquisition Parameters  
Date\_ 20121026  
Time 17.22  
INSTRUM DMS300  
PROBHD 5 mm FASBO BB-  
PULPROG cosygpcrf  
TD 2048  
SOLVENT DMSO  
NS 1  
DS 1  
SHE 6684.482 Hz  
FIDRES 3.243912 Hz  
AQ 0.1532404 sec  
RG 11585.2  
DW 74.800 usec  
DE 6.00 usec  
TE 292.4 K  
DO 0.00000000 sec  
D1 2.00000000 sec  
d13 0.00000400 sec  
D16 0.00020000 sec  
INO 0.00014960 sec

===== CHANNEL f1 =====  
NUC1 1H  
P1 9.80 usec  
PL1 -3.40 dB  
SFO1 500.1322504 MHz

===== GRADIENT CHANNEL =====  
GPNAM1 SINE.100  
GPNAM2 SINE.100  
GPNAM3 SINE.100  
GPZ1 16.00 %  
GPZ2 12.00 %  
GPZ3 40.00 %  
P16 1000.00 usec

F1 - Acquisition parameters  
NO 1  
TD 128  
SFO1 500.1323 MHz  
FIDRES 52.222595 Hz  
SW 13.365 ppm  
FMODE QF

F2 - Processing parameters  
SI 1024  
SF 500.1300212 MHz  
WDW SINC  
SSB 0  
LB 0.00 Hz  
GB 0  
PC 1.00

F1 - Processing parameters  
SI 1024  
SF 500.1300130 MHz  
WDW SINC  
SSB 0  
LB 0.00 Hz  
GB 0

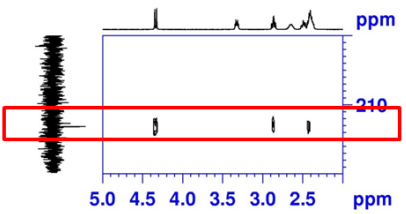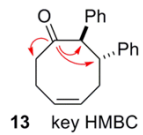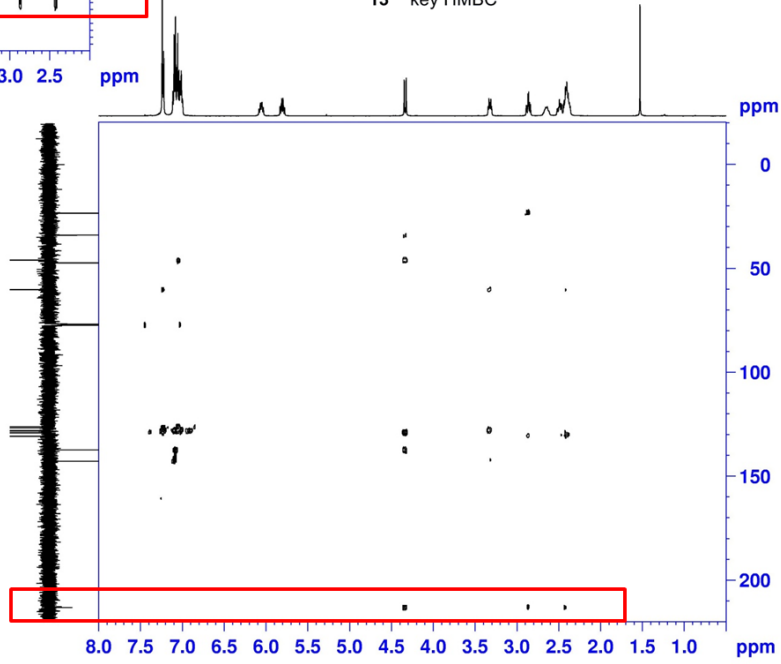

Current Data Parameters  
NAME CRA-04-011-01  
EXPNO 21  
PROCNO 1

F2 - Acquisition Parameters  
Date\_ 20121031  
Time 16.00  
INSTRUM DMS300  
PROBHD 5 mm FASBO BB-  
PULPROG hmbcgp1pndgr  
TD 65536  
SOLVENT DMSO  
NS 16  
DS 16  
SHE 5318.764 Hz  
FIDRES 0.347354 Hz  
AQ 0.3711476 sec  
RG 16384  
DW 90.600 usec  
DE 6.00 usec  
TE 298.2 K  
DO 0.00000000 sec  
D1 15.00000000 sec  
D13 0.00000000 sec  
D16 0.00000000 sec  
INO 0.00000000 sec

===== CHANNEL f1 =====  
NUC1 1H  
P1 9.80 usec  
PL1 -3.40 dB  
SFO1 500.1322504 MHz

===== CHANNEL f2 =====  
NUC2 13C  
P2 13.00 usec  
PL2 -4.00 dB  
SFO2 125.7703443 MHz

===== GRADIENT CHANNEL =====  
GPNAM1 SINE.100  
GPNAM2 SINE.100  
GPNAM3 SINE.100  
GPZ1 50.00 %  
GPZ2 30.00 %  
GPZ3 40.00 %  
P16 1000.00 usec

F1 - Acquisition parameter  
NO 2  
TD 128  
SFO1 125.7703 MHz  
FIDRES 236.027191 Hz  
SW 240.211 ppm  
FMODE QF

F2 - Processing parameters  
SI 2048  
SF 500.1300224 MHz  
WDW SINC  
SSB 0  
LB 0.00 Hz  
GB 0  
PC 1.40

F1 - Processing parameters  
SI 1024  
SF 500.1300130 MHz  
WDW SINC  
SSB 0  
LB 0.00 Hz  
GB 0
